# Supplementary material
Source: publisher figshare collection journal article supplement (https://acs.figshare.com/ndownloader/files/5619594)
Supplement: Supplementary file 1 [file 5619594]

 
data_m
#complex 1
_audit_creation_method           SHELXL-2014/7
_shelx_SHELXL_version_number     2014/7
_chemical_name_systematic        ?
_chemical_name_common            ?
_chemical_melting_point          ?
_chemical_formula_moiety         ?
_chemical_formula_structural ((C4H9)4N)2[Mo6I8(O2CCH3)6]
_chemical_formula_sum            'C44 H90 I8 Mo6 N2 O12'
_chemical_formula_weight         2430.01

loop_
_atom_type_symbol
_atom_type_description
_atom_type_scat_dispersion_real
_atom_type_scat_dispersion_imag
_atom_type_scat_source
C C 0.0033 0.0016 'International Tables Vol C Tables 4.2.6.8 and 6.1.1.4'
H H 0.0000 0.0000 'International Tables Vol C Tables 4.2.6.8 and 6.1.1.4'
N N 0.0061 0.0033 'International Tables Vol C Tables 4.2.6.8 and 6.1.1.4'
O O 0.0106 0.0060 'International Tables Vol C Tables 4.2.6.8 and 6.1.1.4'
Mo Mo -1.6832 0.6857 'International Tables Vol C Tables 4.2.6.8 and 6.1.1.4'
I I -0.4742 1.8119 'International Tables Vol C Tables 4.2.6.8 and 6.1.1.4'

_space_group_crystal_system      monoclinic
_space_group_IT_number           14
_space_group_name_H-M_alt        'P 21/n'
_space_group_name_Hall           '-P 2yn'

_shelx_space_group_comment       
;
The symmetry employed for this shelxl refinement is uniquely defined
by the following loop, which should always be used as a source of
symmetry information in preference to the above space-group names.
They are only intended as comments.
;

loop_
_space_group_symop_operation_xyz
'x, y, z'
'-x+1/2, y+1/2, -z+1/2'
'-x, -y, -z'
'x-1/2, -y-1/2, z-1/2'

_cell_length_a                   11.8966(4)
_cell_length_b                   20.0367(7)
_cell_length_c                   14.4535(5)
_cell_angle_alpha                90
_cell_angle_beta                 95.4780(10)
_cell_angle_gamma                90
_cell_volume                     3429.5(2)
_cell_formula_units_Z            2
_cell_measurement_temperature    100(2)
_cell_measurement_reflns_used    6615
_cell_measurement_theta_min      2.83
_cell_measurement_theta_max      38.11

_exptl_crystal_description       plate
_exptl_crystal_colour            brown
_exptl_crystal_density_meas      ?
_exptl_crystal_density_method    ?
_exptl_crystal_density_diffrn    2.353
_exptl_crystal_F_000             2280
_exptl_transmission_factor_min   ?
_exptl_transmission_factor_max   ?
_exptl_crystal_size_max          0.216
_exptl_crystal_size_mid          0.139
_exptl_crystal_size_min          0.050
_exptl_absorpt_coefficient_mu    4.714
_shelx_estimated_absorpt_T_min   0.429
_shelx_estimated_absorpt_T_max   0.798
_exptl_absorpt_correction_type   multi-scan
_exptl_absorpt_correction_T_min  0.429
_exptl_absorpt_correction_T_max  0.798
_exptl_absorpt_process_details   'SADABS (Bruker-AXS, 2004)'
_exptl_absorpt_special_details   ?
_diffrn_ambient_temperature      100(2)
_diffrn_radiation_wavelength     0.71073
_diffrn_radiation_type           MoK\a
_diffrn_source                   ?
_diffrn_measurement_device_type  'Bruker Apex Duo'
_diffrn_measurement_method       '\f and \w scans'
_diffrn_detector_area_resol_mean 25
_diffrn_reflns_number            30771
_diffrn_reflns_av_unetI/netI     0.0585
_diffrn_reflns_av_R_equivalents  0.0336
_diffrn_reflns_limit_h_min       -19
_diffrn_reflns_limit_h_max       8
_diffrn_reflns_limit_k_min       -33
_diffrn_reflns_limit_k_max       29
_diffrn_reflns_limit_l_min       -22
_diffrn_reflns_limit_l_max       24
_diffrn_reflns_theta_min         2.033
_diffrn_reflns_theta_max         36.317
_diffrn_reflns_theta_full        25.000
_diffrn_measured_fraction_theta_max 0.979
_diffrn_measured_fraction_theta_full 1.000
_diffrn_reflns_Laue_measured_fraction_max 0.979
_diffrn_reflns_Laue_measured_fraction_full 1.000
_diffrn_reflns_point_group_measured_fraction_max 0.979
_diffrn_reflns_point_group_measured_fraction_full 1.000
_reflns_number_total             16290
_reflns_number_gt                11375
_reflns_threshold_expression     >2\s(I)
_reflns_Friedel_coverage         0.000
_reflns_Friedel_fraction_max     .
_reflns_Friedel_fraction_full    .

_reflns_special_details          
;
 Reflections were merged by SHELXL according to the crystal
 class for the calculation of statistics and refinement.
 
 _reflns_Friedel_fraction is defined as the number of unique
 Friedel pairs measured divided by the number that would be
 possible theoretically, ignoring centric projections and
 systematic absences.
;
_computing_data_collection       'APEX2 (Bruker-AXS, 2004)'
_computing_cell_refinement       'SAINT (Bruker-AXS, 2004)'
_computing_data_reduction        'SAINT (Bruker-AXS, 2004)'
_computing_structure_solution    'SHELXS-2014 (Sheldrick, 2014)'
_computing_structure_refinement  'SHELXL-2014 (Sheldrick, 2014)'
_computing_molecular_graphics    'SHELXLE (Sheldrick, 2011)'
_computing_publication_material  'CIFTAB-2014 (Sheldrick, 2014)'
_refine_special_details          ?
_refine_ls_structure_factor_coef Fsqd
_refine_ls_matrix_type           full
_refine_ls_weighting_scheme      calc
_refine_ls_weighting_details     
'w=1/[\s^2^(Fo^2^)+(0.0267P)^2^] where P=(Fo^2^+2Fc^2^)/3'
_atom_sites_solution_primary     ?
_atom_sites_solution_secondary   ?
_atom_sites_solution_hydrogens   geom
_refine_ls_hydrogen_treatment    constr
_refine_ls_extinction_method     none
_refine_ls_extinction_coef       .
_refine_ls_number_reflns         16290
_refine_ls_number_parameters     332
_refine_ls_number_restraints     0
_refine_ls_R_factor_all          0.0668
_refine_ls_R_factor_gt           0.0383
_refine_ls_wR_factor_ref         0.0823
_refine_ls_wR_factor_gt          0.0720
_refine_ls_goodness_of_fit_ref   1.013
_refine_ls_restrained_S_all      1.013
_refine_ls_shift/su_max          0.001
_refine_ls_shift/su_mean         0.000

loop_
_atom_site_label
_atom_site_type_symbol
_atom_site_fract_x
_atom_site_fract_y
_atom_site_fract_z
_atom_site_U_iso_or_equiv
_atom_site_adp_type
_atom_site_occupancy
_atom_site_site_symmetry_order
_atom_site_calc_flag
_atom_site_refinement_flags_posn
_atom_site_refinement_flags_adp
_atom_site_refinement_flags_occupancy
_atom_site_disorder_assembly
_atom_site_disorder_group
Mo1 Mo 0.52622(2) 0.09055(2) -0.02858(2) 0.01395(5) Uani 1 1 d . . . . .
Mo2 Mo 0.59107(2) 0.00937(2) 0.11383(2) 0.01429(5) Uani 1 1 d . . . . .
Mo3 Mo 0.37181(2) 0.02475(2) 0.05896(2) 0.01335(5) Uani 1 1 d . . . . .
I1 I 0.48750(2) 0.12940(2) 0.15088(2) 0.01895(5) Uani 1 1 d . . . . .
I2 I 0.75442(2) 0.07907(2) 0.02848(2) 0.01902(5) Uani 1 1 d . . . . .
I3 I 0.29824(2) 0.11080(2) -0.08516(2) 0.01809(5) Uani 1 1 d . . . . .
I4 I 0.43524(2) -0.05855(2) 0.20999(2) 0.01885(5) Uani 1 1 d . . . . .
O11 O 0.5466(2) 0.19391(13) -0.06296(19) 0.0239(6) Uani 1 1 d . . . . .
O12 O 0.7096(3) 0.20097(16) -0.1269(2) 0.0416(8) Uani 1 1 d . . . . .
O21 O 0.7054(2) 0.01633(15) 0.23330(18) 0.0259(6) Uani 1 1 d . . . . .
O22 O 0.6224(3) 0.06301(19) 0.3495(2) 0.0423(8) Uani 1 1 d . . . . .
O31 O 0.2247(2) 0.04344(12) 0.12517(18) 0.0198(5) Uani 1 1 d . . . . .
O32 O 0.1935(3) 0.15333(14) 0.1159(2) 0.0365(7) Uani 1 1 d . . . . .
C1 C 0.6199(3) 0.2236(2) -0.1056(3) 0.0290(9) Uani 1 1 d . . . . .
C2 C 0.5894(4) 0.2959(2) -0.1288(4) 0.0463(13) Uani 1 1 d . . . . .
H2A H 0.6421 0.3139 -0.1705 0.069 Uiso 1 1 calc R U . . .
H2B H 0.5942 0.3222 -0.0714 0.069 Uiso 1 1 calc R U . . .
H2C H 0.5123 0.2980 -0.1592 0.069 Uiso 1 1 calc R U . . .
C3 C 0.7044(3) 0.0408(2) 0.3153(3) 0.0268(8) Uani 1 1 d . . . . .
C4 C 0.8214(4) 0.0411(3) 0.3691(3) 0.0464(13) Uani 1 1 d . . . . .
H4A H 0.8173 0.0628 0.4294 0.070 Uiso 1 1 calc R U . . .
H4B H 0.8741 0.0657 0.3335 0.070 Uiso 1 1 calc R U . . .
H4C H 0.8479 -0.0049 0.3787 0.070 Uiso 1 1 calc R U . . .
C5 C 0.1656(3) 0.09664(18) 0.1344(3) 0.0213(7) Uani 1 1 d . . . . .
C6 C 0.0510(3) 0.0829(2) 0.1691(3) 0.0309(9) Uani 1 1 d . . . . .
H6A H 0.0091 0.1249 0.1716 0.046 Uiso 1 1 calc R U . . .
H6B H 0.0618 0.0632 0.2314 0.046 Uiso 1 1 calc R U . . .
H6C H 0.0085 0.0519 0.1267 0.046 Uiso 1 1 calc R U . . .
N1 N 0.9704(2) 0.30618(14) 0.0137(2) 0.0185(6) Uani 1 1 d . . . . .
C11 C 0.9570(3) 0.38069(17) -0.0044(3) 0.0207(7) Uani 1 1 d . . . . .
H11A H 0.9610 0.4040 0.0562 0.025 Uiso 1 1 calc R U . . .
H11B H 1.0217 0.3962 -0.0371 0.025 Uiso 1 1 calc R U . . .
C12 C 0.8486(3) 0.40116(18) -0.0611(3) 0.0235(7) Uani 1 1 d . . . . .
H12A H 0.7829 0.3831 -0.0321 0.028 Uiso 1 1 calc R U . . .
H12B H 0.8472 0.3826 -0.1246 0.028 Uiso 1 1 calc R U . . .
C13 C 0.8407(3) 0.47715(18) -0.0660(3) 0.0230(7) Uani 1 1 d . . . . .
H13A H 0.8434 0.4955 -0.0022 0.028 Uiso 1 1 calc R U . . .
H13B H 0.9062 0.4949 -0.0954 0.028 Uiso 1 1 calc R U . . .
C14 C 0.7319(3) 0.4996(2) -0.1215(3) 0.0300(9) Uani 1 1 d . . . . .
H14A H 0.7270 0.5484 -0.1201 0.045 Uiso 1 1 calc R U . . .
H14B H 0.6670 0.4804 -0.0941 0.045 Uiso 1 1 calc R U . . .
H14C H 0.7318 0.4844 -0.1860 0.045 Uiso 1 1 calc R U . . .
C21 C 0.8713(3) 0.27815(18) 0.0617(3) 0.0205(7) Uani 1 1 d . . . . .
H21A H 0.8048 0.2753 0.0153 0.025 Uiso 1 1 calc R U . . .
H21B H 0.8906 0.2321 0.0825 0.025 Uiso 1 1 calc R U . . .
C22 C 0.8382(3) 0.3174(2) 0.1445(3) 0.0279(8) Uani 1 1 d . . . . .
H22A H 0.8150 0.3631 0.1248 0.034 Uiso 1 1 calc R U . . .
H22B H 0.9036 0.3209 0.1920 0.034 Uiso 1 1 calc R U . . .
C23 C 0.7401(3) 0.2819(2) 0.1859(3) 0.0289(9) Uani 1 1 d . . . . .
H23A H 0.7002 0.3146 0.2223 0.035 Uiso 1 1 calc R U . . .
H23B H 0.6859 0.2659 0.1344 0.035 Uiso 1 1 calc R U . . .
C24 C 0.7761(4) 0.2233(2) 0.2480(3) 0.0348(10) Uani 1 1 d . . . . .
H24A H 0.7094 0.2031 0.2716 0.052 Uiso 1 1 calc R U . . .
H24B H 0.8280 0.2388 0.3004 0.052 Uiso 1 1 calc R U . . .
H24C H 0.8141 0.1900 0.2123 0.052 Uiso 1 1 calc R U . . .
C31 C 0.9728(3) 0.27095(17) -0.0800(2) 0.0201(7) Uani 1 1 d . . . . .
H31A H 0.9019 0.2816 -0.1187 0.024 Uiso 1 1 calc R U . . .
H31B H 1.0358 0.2897 -0.1118 0.024 Uiso 1 1 calc R U . . .
C32 C 0.9860(3) 0.19614(17) -0.0763(3) 0.0209(7) Uani 1 1 d . . . . .
H32A H 0.9246 0.1760 -0.0440 0.025 Uiso 1 1 calc R U . . .
H32B H 1.0591 0.1841 -0.0417 0.025 Uiso 1 1 calc R U . . .
C33 C 0.9814(3) 0.17015(19) -0.1758(3) 0.0252(8) Uani 1 1 d . . . . .
H33A H 0.9140 0.1890 -0.2120 0.030 Uiso 1 1 calc R U . . .
H33B H 1.0488 0.1862 -0.2043 0.030 Uiso 1 1 calc R U . . .
C34 C 0.9767(3) 0.0947(2) -0.1830(3) 0.0344(10) Uani 1 1 d . . . . .
H34A H 0.9759 0.0814 -0.2484 0.052 Uiso 1 1 calc R U . . .
H34B H 0.9080 0.0784 -0.1581 0.052 Uiso 1 1 calc R U . . .
H34C H 1.0430 0.0755 -0.1473 0.052 Uiso 1 1 calc R U . . .
C41 C 1.0791(3) 0.29433(18) 0.0764(3) 0.0201(7) Uani 1 1 d . . . . .
H41A H 1.0775 0.3228 0.1322 0.024 Uiso 1 1 calc R U . . .
H41B H 1.0799 0.2473 0.0974 0.024 Uiso 1 1 calc R U . . .
C42 C 1.1886(3) 0.30804(19) 0.0332(3) 0.0222(7) Uani 1 1 d . . . . .
H42A H 1.1987 0.2747 -0.0159 0.027 Uiso 1 1 calc R U . . .
H42B H 1.1855 0.3529 0.0043 0.027 Uiso 1 1 calc R U . . .
C43 C 1.2872(3) 0.3044(2) 0.1078(3) 0.0260(8) Uani 1 1 d . . . . .
H43A H 1.2877 0.2601 0.1382 0.031 Uiso 1 1 calc R U . . .
H43B H 1.2775 0.3387 0.1557 0.031 Uiso 1 1 calc R U . . .
C44 C 1.3996(3) 0.3154(2) 0.0677(3) 0.0321(9) Uani 1 1 d . . . . .
H44A H 1.4612 0.3127 0.1177 0.048 Uiso 1 1 calc R U . . .
H44B H 1.3999 0.3596 0.0387 0.048 Uiso 1 1 calc R U . . .
H44C H 1.4100 0.2811 0.0210 0.048 Uiso 1 1 calc R U . . .

loop_
_atom_site_aniso_label
_atom_site_aniso_U_11
_atom_site_aniso_U_22
_atom_site_aniso_U_33
_atom_site_aniso_U_23
_atom_site_aniso_U_13
_atom_site_aniso_U_12
Mo1 0.01336(11) 0.01211(12) 0.01642(12) 0.00211(10) 0.00156(9) -0.00009(10)
Mo2 0.01336(11) 0.01550(13) 0.01367(12) 0.00089(10) -0.00056(9) 0.00068(10)
Mo3 0.01219(11) 0.01289(12) 0.01496(12) 0.00220(10) 0.00121(9) 0.00085(10)
I1 0.02040(10) 0.01677(10) 0.01956(10) -0.00276(8) 0.00123(8) 0.00043(8)
I2 0.01393(9) 0.01900(11) 0.02400(11) -0.00012(9) 0.00114(8) -0.00340(8)
I3 0.01560(9) 0.01865(10) 0.01989(10) 0.00511(8) 0.00099(7) 0.00439(8)
I4 0.02003(10) 0.02034(11) 0.01664(10) 0.00545(8) 0.00417(8) 0.00369(8)
O11 0.0223(12) 0.0225(13) 0.0278(14) 0.0081(11) 0.0077(11) 0.0042(11)
O12 0.0320(16) 0.0386(18) 0.056(2) 0.0155(17) 0.0127(15) 0.0007(14)
O21 0.0198(12) 0.0384(16) 0.0181(12) -0.0036(12) -0.0057(10) 0.0031(12)
O22 0.0299(16) 0.076(3) 0.0213(14) -0.0030(16) 0.0043(12) 0.0094(17)
O31 0.0175(11) 0.0173(12) 0.0252(13) 0.0045(10) 0.0059(10) 0.0026(10)
O32 0.0348(16) 0.0206(14) 0.056(2) 0.0048(14) 0.0149(15) 0.0058(12)
C1 0.0283(19) 0.0223(19) 0.035(2) 0.0077(17) -0.0055(17) -0.0076(16)
C2 0.033(2) 0.028(2) 0.076(4) 0.028(2) -0.005(2) -0.0070(19)
C3 0.0241(18) 0.038(2) 0.0183(17) 0.0056(16) 0.0004(14) -0.0018(17)
C4 0.028(2) 0.088(4) 0.022(2) -0.008(2) -0.0040(17) -0.004(3)
C5 0.0231(17) 0.0190(17) 0.0222(17) 0.0008(14) 0.0039(13) 0.0023(14)
C6 0.0195(17) 0.033(2) 0.041(2) -0.0005(19) 0.0064(16) 0.0062(16)
N1 0.0163(12) 0.0161(13) 0.0229(14) -0.0019(12) 0.0007(11) -0.0004(11)
C11 0.0176(15) 0.0151(16) 0.0295(19) -0.0014(14) 0.0020(13) 0.0006(13)
C12 0.0189(16) 0.0192(17) 0.031(2) -0.0006(15) -0.0038(14) -0.0007(14)
C13 0.0227(17) 0.0187(17) 0.0273(18) -0.0021(15) 0.0010(14) -0.0009(14)
C14 0.031(2) 0.026(2) 0.032(2) 0.0013(17) -0.0024(17) 0.0053(17)
C21 0.0184(15) 0.0202(17) 0.0240(17) -0.0033(14) 0.0071(13) -0.0059(13)
C22 0.0259(19) 0.028(2) 0.032(2) -0.0098(17) 0.0110(16) -0.0036(16)
C23 0.0213(17) 0.039(2) 0.0272(19) -0.0097(18) 0.0068(15) -0.0059(17)
C24 0.033(2) 0.043(3) 0.029(2) -0.005(2) 0.0077(17) -0.008(2)
C31 0.0219(16) 0.0198(16) 0.0191(16) -0.0019(14) 0.0036(13) -0.0010(14)
C32 0.0194(15) 0.0191(16) 0.0240(17) -0.0055(14) 0.0012(13) -0.0031(13)
C33 0.0240(17) 0.0254(19) 0.0272(19) -0.0106(16) 0.0074(14) -0.0010(15)
C34 0.0239(19) 0.037(2) 0.043(2) -0.022(2) 0.0049(17) -0.0083(18)
C41 0.0186(15) 0.0185(16) 0.0229(17) -0.0028(14) -0.0003(13) -0.0017(13)
C42 0.0158(15) 0.0220(18) 0.0284(19) 0.0008(15) 0.0012(13) -0.0008(13)
C43 0.0184(16) 0.0234(19) 0.035(2) 0.0027(16) -0.0019(15) 0.0009(14)
C44 0.0173(17) 0.035(2) 0.043(2) 0.004(2) -0.0010(16) 0.0011(16)

_geom_special_details            
;
 All esds (except the esd in the dihedral angle between two l.s. planes)
 are estimated using the full covariance matrix.  The cell esds are taken
 into account individually in the estimation of esds in distances, angles
 and torsion angles; correlations between esds in cell parameters are only
 used when they are defined by crystal symmetry.  An approximate (isotropic)
 treatment of cell esds is used for estimating esds involving l.s. planes.
;

loop_
_geom_bond_atom_site_label_1
_geom_bond_atom_site_label_2
_geom_bond_distance
_geom_bond_site_symmetry_2
_geom_bond_publ_flag
Mo1 O11 2.149(3) . ?
Mo1 Mo3 2.6652(4) 3_655 ?
Mo1 Mo2 2.6731(4) 3_655 ?
Mo1 Mo3 2.6752(4) . ?
Mo1 Mo2 2.6784(4) . ?
Mo1 I2 2.7705(4) . ?
Mo1 I4 2.7795(4) 3_655 ?
Mo1 I3 2.7868(4) . ?
Mo1 I1 2.7883(4) . ?
Mo2 O21 2.098(2) . ?
Mo2 Mo3 2.6665(4) 3_655 ?
Mo2 Mo3 2.6708(4) . ?
Mo2 Mo1 2.6731(4) 3_655 ?
Mo2 I2 2.7761(4) . ?
Mo2 I4 2.7771(4) . ?
Mo2 I1 2.7776(4) . ?
Mo2 I3 2.7942(4) 3_655 ?
Mo3 O31 2.107(2) . ?
Mo3 Mo1 2.6652(4) 3_655 ?
Mo3 Mo2 2.6665(4) 3_655 ?
Mo3 I1 2.7762(4) . ?
Mo3 I3 2.7801(4) . ?
Mo3 I4 2.7940(4) . ?
Mo3 I2 2.7960(4) 3_655 ?
I2 Mo3 2.7960(4) 3_655 ?
I3 Mo2 2.7942(4) 3_655 ?
I4 Mo1 2.7795(4) 3_655 ?
O11 C1 1.263(5) . ?
O12 C1 1.226(5) . ?
O21 C3 1.285(5) . ?
O22 C3 1.218(5) . ?
O31 C5 1.291(4) . ?
O32 C5 1.220(5) . ?
C1 C2 1.523(6) . ?
C3 C4 1.528(6) . ?
C5 C6 1.522(5) . ?
N1 C11 1.521(4) . ?
N1 C41 1.525(4) . ?
N1 C31 1.530(4) . ?
N1 C21 1.530(4) . ?
C11 C12 1.517(5) . ?
C12 C13 1.527(5) . ?
C13 C14 1.524(5) . ?
C21 C22 1.515(5) . ?
C22 C23 1.536(5) . ?
C23 C24 1.514(6) . ?
C31 C32 1.508(5) . ?
C32 C33 1.526(5) . ?
C33 C34 1.516(5) . ?
C41 C42 1.522(5) . ?
C42 C43 1.517(5) . ?
C43 C44 1.524(5) . ?

loop_
_geom_angle_atom_site_label_1
_geom_angle_atom_site_label_2
_geom_angle_atom_site_label_3
_geom_angle
_geom_angle_site_symmetry_1
_geom_angle_site_symmetry_3
_geom_angle_publ_flag
O11 Mo1 Mo3 137.23(7) . 3_655 ?
O11 Mo1 Mo2 132.90(7) . 3_655 ?
Mo3 Mo1 Mo2 60.041(11) 3_655 3_655 ?
O11 Mo1 Mo3 133.01(7) . . ?
Mo3 Mo1 Mo3 89.694(12) 3_655 . ?
Mo2 Mo1 Mo3 59.811(11) 3_655 . ?
O11 Mo1 Mo2 137.08(8) . . ?
Mo3 Mo1 Mo2 59.866(11) 3_655 . ?
Mo2 Mo1 Mo2 89.931(12) 3_655 . ?
Mo3 Mo1 Mo2 59.850(10) . . ?
O11 Mo1 I2 91.13(7) . . ?
Mo3 Mo1 I2 61.876(10) 3_655 . ?
Mo2 Mo1 I2 121.912(13) 3_655 . ?
Mo3 Mo1 I2 121.060(13) . . ?
Mo2 Mo1 I2 61.231(10) . . ?
O11 Mo1 I4 88.38(7) . 3_655 ?
Mo3 Mo1 I4 61.708(10) 3_655 3_655 ?
Mo2 Mo1 I4 61.201(10) 3_655 3_655 ?
Mo3 Mo1 I4 120.999(13) . 3_655 ?
Mo2 Mo1 I4 121.570(13) . 3_655 ?
I2 Mo1 I4 90.945(11) . 3_655 ?
O11 Mo1 I3 85.42(7) . . ?
Mo3 Mo1 I3 121.562(13) 3_655 . ?
Mo2 Mo1 I3 61.524(10) 3_655 . ?
Mo3 Mo1 I3 61.152(10) . . ?
Mo2 Mo1 I3 120.981(12) . . ?
I2 Mo1 I3 176.385(13) . . ?
I4 Mo1 I3 90.018(11) 3_655 . ?
O11 Mo1 I1 88.76(7) . . ?
Mo3 Mo1 I1 120.896(13) 3_655 . ?
Mo2 Mo1 I1 120.840(13) 3_655 . ?
Mo3 Mo1 I1 61.038(10) . . ?
Mo2 Mo1 I1 61.033(10) . . ?
I2 Mo1 I1 89.453(11) . . ?
I4 Mo1 I1 177.118(13) 3_655 . ?
I3 Mo1 I1 89.413(10) . . ?
O21 Mo2 Mo3 129.46(7) . 3_655 ?
O21 Mo2 Mo3 140.78(7) . . ?
Mo3 Mo2 Mo3 89.764(12) 3_655 . ?
O21 Mo2 Mo1 134.26(8) . 3_655 ?
Mo3 Mo2 Mo1 60.135(10) 3_655 3_655 ?
Mo3 Mo2 Mo1 59.833(10) . 3_655 ?
O21 Mo2 Mo1 135.12(8) . . ?
Mo3 Mo2 Mo1 59.821(11) 3_655 . ?
Mo3 Mo2 Mo1 60.016(10) . . ?
Mo1 Mo2 Mo1 90.067(12) 3_655 . ?
O21 Mo2 I2 84.61(8) . . ?
Mo3 Mo2 I2 61.786(10) 3_655 . ?
Mo3 Mo2 I2 121.016(13) . . ?
Mo1 Mo2 I2 121.917(13) 3_655 . ?
Mo1 Mo2 I2 61.020(10) . . ?
O21 Mo2 I4 91.83(8) . . ?
Mo3 Mo2 I4 121.413(13) 3_655 . ?
Mo3 Mo2 I4 61.672(10) . . ?
Mo1 Mo2 I4 61.290(10) 3_655 . ?
Mo1 Mo2 I4 121.677(13) . . ?
I2 Mo2 I4 176.366(13) . . ?
O21 Mo2 I1 92.77(8) . . ?
Mo3 Mo2 I1 121.254(13) 3_655 . ?
Mo3 Mo2 I1 61.232(10) . . ?
Mo1 Mo2 I1 121.049(13) 3_655 . ?
Mo1 Mo2 I1 61.437(10) . . ?
I2 Mo2 I1 89.559(11) . . ?
I4 Mo2 I1 89.901(11) . . ?
O21 Mo2 I3 84.36(8) . 3_655 ?
Mo3 Mo2 I3 61.154(10) 3_655 3_655 ?
Mo3 Mo2 I3 121.074(13) . 3_655 ?
Mo1 Mo2 I3 61.243(10) 3_655 3_655 ?
Mo1 Mo2 I3 120.965(13) . 3_655 ?
I2 Mo2 I3 90.445(11) . 3_655 ?
I4 Mo2 I3 89.914(11) . 3_655 ?
I1 Mo2 I3 177.117(13) . 3_655 ?
O31 Mo3 Mo1 129.78(7) . 3_655 ?
O31 Mo3 Mo2 133.64(7) . 3_655 ?
Mo1 Mo3 Mo2 60.311(11) 3_655 3_655 ?
O31 Mo3 Mo2 135.69(7) . . ?
Mo1 Mo3 Mo2 60.126(11) 3_655 . ?
Mo2 Mo3 Mo2 90.237(12) 3_655 . ?
O31 Mo3 Mo1 139.90(7) . . ?
Mo1 Mo3 Mo1 90.305(12) 3_655 . ?
Mo2 Mo3 Mo1 60.054(11) 3_655 . ?
Mo2 Mo3 Mo1 60.134(10) . . ?
O31 Mo3 I1 92.50(7) . . ?
Mo1 Mo3 I1 121.390(13) 3_655 . ?
Mo2 Mo3 I1 121.537(12) 3_655 . ?
Mo2 Mo3 I1 61.281(10) . . ?
Mo1 Mo3 I1 61.492(10) . . ?
O31 Mo3 I3 90.83(7) . . ?
Mo1 Mo3 I3 121.992(13) 3_655 . ?
Mo2 Mo3 I3 61.690(10) 3_655 . ?
Mo2 Mo3 I3 121.516(13) . . ?
Mo1 Mo3 I3 61.403(10) . . ?
I1 Mo3 I3 89.796(11) . . ?
O31 Mo3 I4 85.72(7) . . ?
Mo1 Mo3 I4 61.160(10) 3_655 . ?
Mo2 Mo3 I4 121.467(13) 3_655 . ?
Mo2 Mo3 I4 61.037(10) . . ?
Mo1 Mo3 I4 121.161(12) . . ?
I1 Mo3 I4 89.582(11) . . ?
I3 Mo3 I4 176.459(13) . . ?
O31 Mo3 I2 84.49(7) . 3_655 ?
Mo1 Mo3 I2 60.914(10) 3_655 3_655 ?
Mo2 Mo3 I2 61.034(10) 3_655 3_655 ?
Mo2 Mo3 I2 121.036(13) . 3_655 ?
Mo1 Mo3 I2 121.084(13) . 3_655 ?
I1 Mo3 I2 176.994(13) . 3_655 ?
I3 Mo3 I2 90.324(11) . 3_655 ?
I4 Mo3 I2 90.115(11) . 3_655 ?
Mo3 I1 Mo2 57.487(9) . . ?
Mo3 I1 Mo1 57.470(9) . . ?
Mo2 I1 Mo1 57.530(9) . . ?
Mo1 I2 Mo2 57.749(9) . . ?
Mo1 I2 Mo3 57.212(9) . 3_655 ?
Mo2 I2 Mo3 57.178(9) . 3_655 ?
Mo3 I3 Mo1 57.445(9) . . ?
Mo3 I3 Mo2 57.155(9) . 3_655 ?
Mo1 I3 Mo2 57.234(9) . 3_655 ?
Mo2 I4 Mo1 57.509(9) . 3_655 ?
Mo2 I4 Mo3 57.291(9) . . ?
Mo1 I4 Mo3 57.134(9) 3_655 . ?
C1 O11 Mo1 131.7(3) . . ?
C3 O21 Mo2 136.3(3) . . ?
C5 O31 Mo3 132.7(2) . . ?
O12 C1 O11 127.4(4) . . ?
O12 C1 C2 119.4(4) . . ?
O11 C1 C2 113.2(4) . . ?
O22 C3 O21 126.2(4) . . ?
O22 C3 C4 121.3(4) . . ?
O21 C3 C4 112.5(4) . . ?
O32 C5 O31 125.7(3) . . ?
O32 C5 C6 120.7(3) . . ?
O31 C5 C6 113.5(3) . . ?
C11 N1 C41 108.9(3) . . ?
C11 N1 C31 108.1(3) . . ?
C41 N1 C31 111.6(3) . . ?
C11 N1 C21 111.4(3) . . ?
C41 N1 C21 108.6(3) . . ?
C31 N1 C21 108.2(3) . . ?
C12 C11 N1 115.3(3) . . ?
C11 C12 C13 109.9(3) . . ?
C14 C13 C12 111.4(3) . . ?
C22 C21 N1 115.9(3) . . ?
C21 C22 C23 109.4(3) . . ?
C24 C23 C22 114.1(3) . . ?
C32 C31 N1 116.0(3) . . ?
C31 C32 C33 108.1(3) . . ?
C34 C33 C32 113.8(4) . . ?
C42 C41 N1 116.0(3) . . ?
C43 C42 C41 109.5(3) . . ?
C42 C43 C44 111.7(3) . . ?

_refine_diff_density_max         2.715
_refine_diff_density_min         -1.662
_refine_diff_density_rms         0.223

_shelx_res_file                  
;

    m.res created by SHELXL-2014/7


TITL mxm640 in P2(1)/n DUO at 100K
CELL 0.71073  11.8966  20.0367  14.4535  90.000  95.478  90.000
ZERR    2.00   0.0004   0.0007   0.0005   0.000   0.001   0.000
LATT  1
SYMM 0.5-X, 0.5+Y, 0.5-Z
SFAC C H N O MO I
UNIT 88 180 4 24 12 16
LIST 4 ! automatically inserted. Change 6 to 4 for CHECKCIF!!
TEMP -173.000
SIZE 0.05 0.139 0.216
L.S. 10
BOND
FMAP 2
PLAN 10
ACTA 50
OMIT 1 1 0
SHEL 9999 0.6
WGHT    0.026700
FVAR       0.04698
MO1   5    0.526222    0.090545   -0.028582    11.00000    0.01336    0.01211 =
         0.01642    0.00211    0.00156   -0.00009
MO2   5    0.591066    0.009374    0.113831    11.00000    0.01336    0.01550 =
         0.01367    0.00089   -0.00056    0.00068
MO3   5    0.371807    0.024754    0.058955    11.00000    0.01219    0.01289 =
         0.01496    0.00220    0.00121    0.00085
I1    6    0.487504    0.129405    0.150883    11.00000    0.02040    0.01677 =
         0.01956   -0.00276    0.00123    0.00043
I2    6    0.754423    0.079074    0.028477    11.00000    0.01393    0.01900 =
         0.02400   -0.00012    0.00114   -0.00340
I3    6    0.298240    0.110795   -0.085160    11.00000    0.01560    0.01865 =
         0.01989    0.00511    0.00099    0.00439
I4    6    0.435238   -0.058550    0.209990    11.00000    0.02003    0.02034 =
         0.01664    0.00545    0.00417    0.00369
O11   4    0.546629    0.193909   -0.062964    11.00000    0.02226    0.02250 =
         0.02783    0.00808    0.00765    0.00418
O12   4    0.709638    0.200973   -0.126895    11.00000    0.03195    0.03864 =
         0.05596    0.01547    0.01271    0.00075
O21   4    0.705390    0.016330    0.233302    11.00000    0.01976    0.03843 =
         0.01814   -0.00363   -0.00566    0.00314
O22   4    0.622408    0.063013    0.349460    11.00000    0.02993    0.07605 =
         0.02125   -0.00301    0.00428    0.00944
O31   4    0.224728    0.043439    0.125174    11.00000    0.01752    0.01732 =
         0.02525    0.00448    0.00590    0.00262
O32   4    0.193543    0.153326    0.115933    11.00000    0.03476    0.02064 =
         0.05603    0.00476    0.01492    0.00584
C1    1    0.619898    0.223558   -0.105595    11.00000    0.02833    0.02227 =
         0.03483    0.00773   -0.00554   -0.00763
C2    1    0.589394    0.295876   -0.128762    11.00000    0.03311    0.02823 =
         0.07551    0.02754   -0.00526   -0.00698
AFIX 137
H2A   2    0.642080    0.313915   -0.170541    11.00000   -1.50000
H2B   2    0.594199    0.322238   -0.071408    11.00000   -1.50000
H2C   2    0.512277    0.298002   -0.159243    11.00000   -1.50000
AFIX   0
C3    1    0.704409    0.040835    0.315348    11.00000    0.02410    0.03753 =
         0.01831    0.00562    0.00045   -0.00182
C4    1    0.821408    0.041117    0.369068    11.00000    0.02754    0.08804 =
         0.02240   -0.00808   -0.00396   -0.00444
AFIX 137
H4A   2    0.817267    0.062784    0.429435    11.00000   -1.50000
H4B   2    0.874142    0.065653    0.333543    11.00000   -1.50000
H4C   2    0.847868   -0.004906    0.378685    11.00000   -1.50000
AFIX   0
C5    1    0.165608    0.096636    0.134370    11.00000    0.02314    0.01902 =
         0.02221    0.00076    0.00390    0.00230
C6    1    0.051042    0.082935    0.169109    11.00000    0.01947    0.03297 =
         0.04093   -0.00051    0.00641    0.00623
AFIX 137
H6A   2    0.009059    0.124873    0.171639    11.00000   -1.50000
H6B   2    0.061785    0.063235    0.231386    11.00000   -1.50000
H6C   2    0.008503    0.051873    0.126672    11.00000   -1.50000
AFIX   0
N1    3    0.970385    0.306184    0.013675    11.00000    0.01628    0.01608 =
         0.02287   -0.00195    0.00067   -0.00036
C11   1    0.957032    0.380688   -0.004380    11.00000    0.01761    0.01507 =
         0.02946   -0.00145    0.00203    0.00062
AFIX  23
H11A  2    0.961010    0.404029    0.056215    11.00000   -1.20000
H11B  2    1.021658    0.396179   -0.037073    11.00000   -1.20000
AFIX   0
C12   1    0.848583    0.401165   -0.061081    11.00000    0.01892    0.01918 =
         0.03127   -0.00060   -0.00380   -0.00073
AFIX  23
H12A  2    0.782913    0.383084   -0.032061    11.00000   -1.20000
H12B  2    0.847248    0.382573   -0.124638    11.00000   -1.20000
AFIX   0
C13   1    0.840672    0.477150   -0.065967    11.00000    0.02271    0.01871 =
         0.02732   -0.00209    0.00103   -0.00095
AFIX  23
H13A  2    0.843416    0.495526   -0.002209    11.00000   -1.20000
H13B  2    0.906243    0.494946   -0.095407    11.00000   -1.20000
AFIX   0
C14   1    0.731944    0.499597   -0.121495    11.00000    0.03095    0.02600 =
         0.03196    0.00134   -0.00239    0.00531
AFIX 137
H14A  2    0.727032    0.548405   -0.120146    11.00000   -1.50000
H14B  2    0.667014    0.480375   -0.094083    11.00000   -1.50000
H14C  2    0.731850    0.484448   -0.185971    11.00000   -1.50000
AFIX   0
C21   1    0.871342    0.278152    0.061726    11.00000    0.01841    0.02022 =
         0.02399   -0.00327    0.00708   -0.00586
AFIX  23
H21A  2    0.804758    0.275325    0.015263    11.00000   -1.20000
H21B  2    0.890564    0.232117    0.082497    11.00000   -1.20000
AFIX   0
C22   1    0.838242    0.317393    0.144510    11.00000    0.02589    0.02752 =
         0.03196   -0.00978    0.01100   -0.00357
AFIX  23
H22A  2    0.815028    0.363068    0.124781    11.00000   -1.20000
H22B  2    0.903641    0.320915    0.192035    11.00000   -1.20000
AFIX   0
C23   1    0.740112    0.281900    0.185930    11.00000    0.02135    0.03919 =
         0.02717   -0.00966    0.00677   -0.00589
AFIX  23
H23A  2    0.700204    0.314631    0.222336    11.00000   -1.20000
H23B  2    0.685940    0.265911    0.134447    11.00000   -1.20000
AFIX   0
C24   1    0.776061    0.223299    0.248022    11.00000    0.03340    0.04318 =
         0.02878   -0.00524    0.00771   -0.00766
AFIX 137
H24A  2    0.709365    0.203144    0.271599    11.00000   -1.50000
H24B  2    0.827950    0.238787    0.300358    11.00000   -1.50000
H24C  2    0.814128    0.190048    0.212288    11.00000   -1.50000
AFIX   0
C31   1    0.972819    0.270951   -0.080017    11.00000    0.02191    0.01976 =
         0.01905   -0.00189    0.00364   -0.00099
AFIX  23
H31A  2    0.901879    0.281555   -0.118714    11.00000   -1.20000
H31B  2    1.035844    0.289742   -0.111760    11.00000   -1.20000
AFIX   0
C32   1    0.986014    0.196144   -0.076271    11.00000    0.01938    0.01914 =
         0.02396   -0.00547    0.00116   -0.00308
AFIX  23
H32A  2    0.924567    0.176001   -0.043990    11.00000   -1.20000
H32B  2    1.059102    0.184133   -0.041747    11.00000   -1.20000
AFIX   0
C33   1    0.981367    0.170146   -0.175815    11.00000    0.02400    0.02542 =
         0.02720   -0.01065    0.00743   -0.00105
AFIX  23
H33A  2    0.913962    0.189043   -0.212020    11.00000   -1.20000
H33B  2    1.048825    0.186248   -0.204258    11.00000   -1.20000
AFIX   0
C34   1    0.976677    0.094691   -0.183032    11.00000    0.02390    0.03703 =
         0.04250   -0.02162    0.00487   -0.00830
AFIX 137
H34A  2    0.975949    0.081440   -0.248355    11.00000   -1.50000
H34B  2    0.908001    0.078400   -0.158078    11.00000   -1.50000
H34C  2    1.043047    0.075461   -0.147330    11.00000   -1.50000
AFIX   0
C41   1    1.079090    0.294329    0.076370    11.00000    0.01860    0.01847 =
         0.02291   -0.00283   -0.00032   -0.00170
AFIX  23
H41A  2    1.077521    0.322804    0.132210    11.00000   -1.20000
H41B  2    1.079927    0.247290    0.097387    11.00000   -1.20000
AFIX   0
C42   1    1.188594    0.308042    0.033190    11.00000    0.01583    0.02203 =
         0.02845    0.00080    0.00119   -0.00083
AFIX  23
H42A  2    1.198657    0.274670   -0.015854    11.00000   -1.20000
H42B  2    1.185535    0.352881    0.004289    11.00000   -1.20000
AFIX   0
C43   1    1.287171    0.304398    0.107814    11.00000    0.01842    0.02335 =
         0.03548    0.00272   -0.00192    0.00088
AFIX  23
H43A  2    1.287701    0.260101    0.138194    11.00000   -1.20000
H43B  2    1.277484    0.338684    0.155729    11.00000   -1.20000
AFIX   0
C44   1    1.399618    0.315444    0.067737    11.00000    0.01726    0.03508 =
         0.04309    0.00364   -0.00095    0.00112
AFIX 137
H44A  2    1.461200    0.312693    0.117708    11.00000   -1.50000
H44B  2    1.399926    0.359633    0.038700    11.00000   -1.50000
H44C  2    1.410043    0.281109    0.021030    11.00000   -1.50000

AFIX   0
HKLF 4

REM  mxm640 in P2(1)/n DUO at 100K
REM R1 =  0.0383 for   11375 Fo > 4sig(Fo)  and  0.0668 for all   16290 data
REM    332 parameters refined using      0 restraints

END

WGHT      0.0267      0.0000

REM Highest difference peak  2.715,  deepest hole -1.662,  1-sigma level  0.223
Q1    1   0.7475  0.0825  0.0760  11.00000  0.05    2.72
Q2    1   0.3787 -0.0673  0.2013  11.00000  0.05    1.89
Q3    1   0.5186  0.1236  0.1982  11.00000  0.05    1.67
Q4    1   0.3235  0.1392 -0.0598  11.00000  0.05    1.66
Q5    1   0.7610  0.0438  0.0201  11.00000  0.05    1.66
Q6    1   0.4392  0.1332  0.1695  11.00000  0.05    1.53
Q7    1   0.7983  0.0574  0.0223  11.00000  0.05    1.50
Q8    1   0.8349  0.4401 -0.2599  11.00000  0.05    1.43
Q9    1   0.6773  0.0170  0.2801  11.00000  0.05    1.35
Q10   1   0.5577  0.0150  0.1464  11.00000  0.05    1.30
;
_shelx_res_checksum              79726

_shelx_hkl_file                  
;
  -2   0   0   25.51    0.58
  -3   0   0   -0.02    0.08
  -3   0   0    0.14    0.08
  -4   0   0  256.90    5.01
  -4   0   0  257.76    5.03
  -5   0   0    0.04    0.09
  -5   0   0    0.07    0.11
  -6   0   0   19.70    0.65
  -6   0   0   19.22    0.66
  -7   0   0   -0.03    0.13
  -7   0   0   -0.04    0.11
  -8   0   0   15.24    0.65
  -8   0   0   16.58    0.67
  -9   0   0    0.13    0.18
  -9   0   0    0.35    0.19
 -10   0   0    9.40    0.59
 -11   0   0   -0.05    0.21
 -12   0   0    0.16    0.22
 -13   0   0    0.18    0.24
 -14   0   0   -0.11    0.25
 -15   0   0    0.10    0.31
 -16   0   0    9.55    0.85
 -17   0   0   -0.47    0.33
 -18   0   0   25.20    1.35
   0  -1   0   -0.87    0.01
  -1   1   0  989.61   19.25
  -2   1   0    1.45    0.14
  -3  -1   0    0.47    0.08
  -3   1   0    0.50    0.13
  -4  -1   0   59.51    1.26
  -4   1   0   59.33    1.39
  -5  -1   0    0.56    0.13
  -5  -1   0    0.60    0.12
  -5   1   0    0.80    0.17
  -6  -1   0    2.95    0.25
  -6  -1   0    2.46    0.24
  -6   1   0    2.73    0.29
  -7  -1   0    2.92    0.28
  -7  -1   0    3.26    0.29
  -7   1   0    3.20    0.34
  -7   1   0    2.81    0.31
  -8  -1   0    0.47    0.17
  -8  -1   0    0.09    0.13
  -8   1   0    0.05    0.15
  -8   1   0   -0.14    0.13
  -9  -1   0    7.18    0.46
  -9  -1   0    6.31    0.45
  -9   1   0    6.92    0.52
  -9   1   0    5.81    0.48
 -10  -1   0   20.10    0.82
 -10   1   0   20.18    0.90
 -11  -1   0    4.16    0.45
 -11   1   0    4.37    0.52
 -12  -1   0    7.49    0.57
 -12   1   0    7.48    0.67
 -13  -1   0    5.54    0.56
 -13   1   0    5.51    0.61
 -14  -1   0    0.43    0.29
 -14   1   0    0.21    0.30
 -15  -1   0   31.09    1.29
 -15   1   0   31.39    1.39
 -16  -1   0    4.09    0.57
 -16   1   0    4.48    0.63
 -17  -1   0   10.84    0.87
 -17   1   0   11.62    0.95
 -18   1   0    0.06    0.43
   0  -2   0  566.02   11.82
   0   2   0  616.45   11.72
   1  -2   0    0.19    0.08
  -1  -2   0    0.22    0.06
  -1   2   0    0.20    0.08
   2  -2   0    1.12    0.19
  -2  -2   0    1.36    0.14
  -2  -2   0    1.51    0.13
  -2   2   0    1.24    0.20
  -3   2   0   14.86    0.54
  -4   2   0   24.03    0.76
  -5  -2   0  185.79    3.60
  -5   2   0  180.09    3.83
  -6  -2   0   89.48    1.91
  -6   2   0   90.02    2.14
  -7  -2   0   51.43    1.24
  -7  -2   0   51.57    1.26
  -7   2   0   50.69    1.44
  -8  -2   0    3.52    0.32
  -8  -2   0    3.20    0.29
  -8   2   0    3.11    0.37
  -9  -2   0   28.52    0.92
  -9  -2   0   29.04    0.92
  -9   2   0   28.60    1.08
 -10  -2   0    5.26    0.45
 -10   2   0    4.80    0.53
 -11  -2   0   80.48    2.05
 -11   2   0   80.02    2.26
 -12  -2   0    0.84    0.26
 -12   2   0    0.88    0.33
 -13  -2   0   13.69    0.75
 -13   2   0   13.91    0.94
 -14  -2   0   -0.09    0.23
 -14   2   0   -0.35    0.31
 -15  -2   0    9.66    0.72
 -15   2   0   11.55    0.91
 -16  -2   0    4.96    0.58
 -16   2   0    4.52    0.67
 -17  -2   0   -0.26    0.30
 -17   2   0   -0.20    0.35
 -18   2   0    5.43    0.78
 -19   2   0    0.08    0.42
   0  -3   0   -0.03    0.08
   0   3   0    0.04    0.09
   1  -3   0   20.29    0.62
  -1  -3   0   21.41    0.57
   2  -3   0    0.31    0.16
  -2  -3   0    0.34    0.11
  -2   3   0    0.18    0.15
  -3  -3   0   64.18    1.36
  -3  -3   0   64.50    1.34
   3  -3   0   67.38    1.55
  -3   3   0   64.03    1.56
  -4  -3   0  259.08    5.02
  -4   3   0  263.19    5.31
  -5  -3   0  356.37    6.87
  -5   3   0  360.24    7.20
  -6  -3   0    2.60    0.21
  -6   3   0    2.80    0.35
  -7  -3   0   11.85    0.45
  -7   3   0   10.63    0.63
  -8  -3   0   19.23    0.65
  -8  -3   0   20.11    0.67
  -8   3   0   19.71    0.87
  -9  -3   0    1.04    0.21
  -9  -3   0    0.90    0.19
  -9   3   0    1.05    0.29
 -10  -3   0   15.40    0.66
 -10   3   0   14.27    0.82
 -11  -3   0    0.38    0.23
 -11   3   0    0.51    0.30
 -12  -3   0    2.89    0.37
 -12   3   0    4.09    0.55
 -13  -3   0    0.83    0.27
 -13   3   0   -0.33    0.35
 -14  -3   0    1.89    0.36
 -14   3   0    1.54    0.51
 -15  -3   0    0.08    0.26
 -15   3   0    0.25    0.37
 -16  -3   0    0.98    0.34
 -16   3   0    1.36    0.47
 -17   3   0    0.70    0.44
 -18   3   0   -0.27    0.41
 -19   3   0    0.10    0.43
   0  -4   0   45.72    1.14
   0   4   0   45.64    1.14
  -1  -4   0   30.23    0.83
  -1   4   0   32.85    0.91
   1   4   0   31.96    0.84
  -2  -4   0   17.65    0.54
   2  -4   0   17.12    0.64
  -2   4   0   18.25    0.67
  -3  -4   0   11.05    0.39
  -3  -4   0   11.24    0.43
   3  -4   0   11.04    0.53
  -3   4   0   11.43    0.54
  -4  -4   0  544.75   10.33
   4  -4   0  529.70   10.47
  -4  -4   0  533.35   10.46
  -4   4   0  536.30   10.53
  -5  -4   0  255.73    5.01
   5  -4   0  256.51    5.27
  -5   4   0  257.02    5.36
  -6  -4   0  164.31    3.24
  -6   4   0  155.72    3.59
  -7  -4   0    1.29    0.18
  -7   4   0    1.16    0.28
  -8  -4   0    0.29    0.13
  -8   4   0   -0.24    0.16
  -9  -4   0   22.55    0.75
  -9  -4   0   21.35    0.74
  -9   4   0   23.83    1.03
 -10  -4   0    6.67    0.47
 -10  -4   0    6.08    0.43
 -10   4   0    6.16    0.64
 -11  -4   0   44.81    1.31
 -11   4   0   46.96    1.67
 -12  -4   0    0.08    0.18
 -12   4   0   -0.02    0.25
 -13  -4   0   29.40    1.05
 -13   4   0   29.09    1.43
 -14  -4   0    0.17    0.23
 -14   4   0   -0.18    0.39
 -15  -4   0    1.55    0.32
 -15   4   0    1.62    0.53
 -16   4   0    0.76    0.45
 -17   4   0    9.10    1.03
 -18   4   0    1.55    0.58
   0  -5   0    0.02    0.14
   0   5   0   -0.18    0.13
   1  -5   0   20.17    0.74
  -1  -5   0   21.15    0.69
  -1   5   0   20.44    0.74
   1   5   0   21.44    0.69
  -2  -5   0   54.47    1.32
   2  -5   0   57.75    1.47
  -2   5   0   53.80    1.46
   3  -5   0   87.67    2.12
  -3  -5   0   89.06    1.93
  -3   5   0   89.52    2.16
  -4  -5   0  120.07    2.48
  -4  -5   0  116.31    2.51
   4  -5   0  118.25    2.72
  -4   5   0  121.01    2.79
  -5  -5   0  331.70    6.38
   5  -5   0  327.99    6.64
  -5  -5   0  319.52    6.33
  -5   5   0  322.04    6.72
  -6  -5   0  138.44    2.90
   6  -5   0  144.04    3.18
  -6   5   0  135.00    3.26
  -7  -5   0    0.31    0.13
  -7   5   0    0.18    0.19
  -8  -5   0    0.08    0.12
  -8   5   0   -0.04    0.18
  -9  -5   0    1.78    0.25
  -9   5   0    1.74    0.38
 -10  -5   0    7.11    0.44
 -10   5   0    6.26    0.68
 -11  -5   0    1.52    0.27
 -11   5   0    1.71    0.43
 -12  -5   0    3.64    0.38
 -12   5   0    2.65    0.53
 -13  -5   0    4.29    0.44
 -13   5   0    3.33    0.62
 -14  -5   0    2.37    0.36
 -14   5   0    0.50    0.45
 -15   5   0    3.62    0.69
 -16   5   0    9.64    1.03
 -17   5   0    5.43    0.84
 -18   5   0   -0.15    0.40
 -19   5   0    1.39    0.61
 -20   5   0    9.42    1.12
   0  -6   0  100.40    2.30
   0   6   0   98.34    2.29
   1  -6   0  184.05    3.88
  -1  -6   0  187.26    3.82
   1   6   0  176.68    3.80
  -1   6   0  179.38    3.89
   2  -6   0   16.93    0.72
  -2  -6   0   15.36    0.61
  -2   6   0   17.46    0.73
   3  -6   0    0.40    0.19
  -3  -6   0    0.03    0.13
  -3   6   0    0.01    0.17
  -4  -6   0  260.40    5.25
  -4  -6   0  262.57    5.22
   4  -6   0  258.10    5.47
  -4   6   0  263.96    5.56
  -5  -6   0  124.81    2.66
  -5  -6   0  125.07    2.70
   5  -6   0  124.74    2.94
  -5   6   0  125.17    3.03
  -6  -6   0    9.57    0.46
   6  -6   0   11.98    0.67
  -6  -6   0    9.83    0.48
  -6   6   0    9.77    0.67
  -7  -6   0   52.44    1.33
   7  -6   0   52.64    1.56
  -7   6   0   50.14    1.67
  -8  -6   0   -0.02    0.12
  -8   6   0    0.19    0.24
  -9  -6   0   68.58    1.69
  -9   6   0   66.77    2.13
 -10   6   0   57.24    1.98
 -11  -6   0    2.20    0.30
 -11   6   0    2.36    0.49
 -12  -6   0    0.63    0.22
 -12   6   0    0.03    0.32
 -13  -6   0    0.13    0.21
 -13   6   0    0.07    0.33
 -14   6   0    6.19    0.81
 -15   6   0    4.29    0.73
 -16   6   0    6.36    0.89
 -17   6   0    3.09    0.70
 -18   6   0    4.12    0.81
 -19   6   0   -0.36    0.43
 -20   6   0    0.90    0.62
   0  -7   0   -0.20    0.12
   0   7   0    0.09    0.16
   1  -7   0    6.34    0.46
  -1  -7   0    5.91    0.43
  -1   7   0    6.87    0.48
   1   7   0    6.23    0.44
  -2  -7   0   24.14    0.82
   2  -7   0   21.74    0.88
  -2   7   0   23.51    0.91
   2   7   0   21.50    0.78
  -3  -7   0    7.70    0.45
   3  -7   0    7.45    0.54
  -3   7   0    7.26    0.54
   4  -7   0    8.09    0.56
  -4  -7   0    8.08    0.45
  -4   7   0    7.95    0.58
  -5  -7   0    4.00    0.34
   5  -7   0    4.88    0.49
  -5  -7   0    5.21    0.40
  -5   7   0    4.32    0.49
  -6  -7   0  156.76    3.34
  -6  -7   0  152.69    3.29
   6  -7   0  159.79    3.65
  -6   7   0  153.66    3.75
   7  -7   0   13.70    0.77
  -7  -7   0   12.91    0.59
  -7   7   0   15.51    0.88
  -8  -7   0   69.23    1.74
   8  -7   0   70.37    2.02
  -8   7   0   68.67    2.17
  -9  -7   0   84.57    2.01
  -9   7   0   77.34    2.46
 -10   7   0   19.16    1.15
 -11  -7   0   14.26    0.65
 -11   7   0   15.27    1.03
 -12   7   0    0.01    0.32
 -13   7   0    6.73    0.85
 -14   7   0    1.20    0.49
 -15   7   0    1.94    0.59
 -16   7   0    5.73    0.88
 -17   7   0    0.00    0.41
 -18   7   0    4.22    0.85
 -19   7   0   -0.33    0.48
 -20   7   0    2.15    0.75
   0  -8   0    0.16    0.16
   0   8   0    0.24    0.18
  -1  -8   0   17.12    0.75
   1  -8   0   17.82    0.80
   1   8   0   18.47    0.77
  -1   8   0   18.18    0.81
  -2  -8   0    2.55    0.32
   2  -8   0    2.91    0.38
   2   8   0    3.21    0.36
  -2   8   0    3.29    0.41
   3  -8   0    0.60    0.23
  -3  -8   0    1.09    0.24
  -3   8   0    0.95    0.27
   4  -8   0    3.34    0.43
  -4  -8   0    3.55    0.35
  -4   8   0    2.72    0.41
  -5  -8   0   10.42    0.54
   5  -8   0   11.25    0.72
  -5   8   0   10.53    0.73
   6  -8   0  107.36    2.80
  -6  -8   0  111.46    2.54
  -6  -8   0  107.72    2.49
  -6   8   0  112.05    2.94
  -7  -8   0    9.62    0.55
   7  -8   0   12.21    0.76
  -7  -8   0   10.64    0.54
  -7   8   0    8.74    0.72
   8  -8   0   10.02    0.80
  -8  -8   0    9.88    0.57
  -8   8   0    7.94    0.80
  -9   8   0  185.90    4.63
 -10   8   0  146.42    3.92
 -11   8   0    0.20    0.33
 -12  -8   0    3.24    0.37
 -12   8   0    2.40    0.56
 -13   8   0   12.62    1.17
 -14   8   0    2.80    0.64
 -15   8   0    2.74    0.67
 -16   8   0    7.25    1.01
 -17   8   0   11.93    1.28
 -18   8   0    1.91    0.70
 -19   8   0    0.70    0.62
 -20   8   0    2.13    0.75
   0  -9   0   -0.08    0.16
   0   9   0    0.17    0.20
   1  -9   0   74.00    2.10
  -1  -9   0   79.14    2.08
  -1   9   0   80.74    2.15
   1   9   0   80.94    2.07
  -2  -9   0   47.89    1.42
   2  -9   0   47.93    1.53
   2   9   0   45.00    1.37
  -2   9   0   47.04    1.54
  -3  -9   0   16.03    0.73
   3  -9   0   14.77    0.80
  -3   9   0   17.26    0.87
   4  -9   0   28.40    1.15
  -4  -9   0   29.54    1.01
  -4   9   0   26.63    1.17
  -5  -9   0   87.50    2.16
   5  -9   0   87.32    2.42
  -5   9   0   88.91    2.51
  -6  -9   0    0.86    0.23
  -6  -9   0    1.01    0.23
   6  -9   0    0.94    0.31
  -6   9   0    1.25    0.35
   7  -9   0    1.33    0.35
  -7  -9   0    0.97    0.23
  -7  -9   0    1.28    0.26
  -7   9   0    1.07    0.33
  -8  -9   0   85.15    2.17
   8  -9   0   87.58    2.50
  -8   9   0   90.14    2.70
  -9   9   0   79.17    2.59
 -10   9   0   37.32    1.70
 -11   9   0   14.80    1.09
 -12   9   0    8.49    0.96
 -13   9   0    7.68    0.97
 -14   9   0    2.06    0.59
 -15   9   0    0.49    0.49
 -16   9   0    8.36    1.09
 -17   9   0   21.16    1.58
 -18   9   0    9.96    1.24
 -19   9   0   -0.29    0.54
 -20   9   0    1.49    0.75
   0 -10   0  183.50    4.23
   0  10   0  188.88    4.23
  -1 -10   0  242.98    5.22
   1 -10   0  234.97    5.26
   1  10   0  237.72    5.18
  -1  10   0  241.79    5.30
   2 -10   0   15.27    0.85
  -2 -10   0   14.16    0.75
   2  10   0   15.87    0.76
  -2  10   0   13.44    0.82
  -3 -10   0    1.00    0.26
   3 -10   0    1.24    0.31
  -3  10   0    0.56    0.27
  -4 -10   0    8.47    0.58
   4 -10   0    8.59    0.68
  -4  10   0   10.34    0.74
   5 -10   0   67.89    2.09
  -5 -10   0   68.45    1.86
  -5  10   0   69.70    2.18
  -6 -10   0    0.40    0.19
   6 -10   0    0.16    0.23
  -6  10   0    0.63    0.29
  -7 -10   0    1.38    0.27
   7 -10   0    1.31    0.37
  -7 -10   0    1.82    0.32
  -7  10   0    1.40    0.40
   8 -10   0    1.71    0.43
  -8  10   0    2.25    0.53
  -9  10   0   97.43    3.01
 -10  10   0   19.48    1.24
 -11  10   0    6.89    0.86
 -12  10   0    1.54    0.54
 -13  10   0    1.48    0.54
 -14  10   0    7.68    1.02
 -15  10   0    2.31    0.68
 -16  10   0   15.98    1.50
 -17  10   0   44.28    2.30
 -18  10   0   18.69    1.71
 -19  10   0    0.45    0.63
 -20  10   0    0.53    0.67
   0 -11   0   -0.08    0.17
   0  11   0    0.23    0.23
  -1 -11   0    9.17    0.65
   1 -11   0    8.58    0.69
  -1  11   0    8.75    0.75
   1  11   0    8.56    0.64
  -2 -11   0   95.04    2.52
   2 -11   0   97.04    2.63
  -2  11   0   98.24    2.67
   2  11   0   95.38    2.48
   3 -11   0   20.78    1.03
  -3 -11   0   18.07    0.88
   3  11   0   18.48    0.85
  -3  11   0   19.07    1.02
  -4 -11   0    3.12    0.41
   4 -11   0    2.29    0.43
  -4  11   0    2.38    0.47
   5 -11   0    1.53    0.39
  -5 -11   0    1.39    0.30
  -5  11   0    1.50    0.41
  -6 -11   0   13.57    0.76
   6 -11   0   13.30    0.90
  -6  11   0   14.30    0.97
   7 -11   0    9.79    0.80
  -7 -11   0    8.83    0.62
  -7  11   0    7.40    0.82
   8 -11   0    7.10    0.78
  -8 -11   0    8.10    0.60
  -8  11   0    6.74    0.83
  -9  11   0    0.14    0.31
 -10  11   0    6.42    0.84
 -11  11   0    0.34    0.40
 -12  11   0   -0.49    0.32
 -13  11   0    5.76    0.91
 -14  11   0   42.91    2.14
 -15  11   0   11.18    1.25
 -16  11   0   15.78    1.55
 -17  11   0   24.77    1.80
 -18  11   0    1.89    0.76
 -19  11   0    0.70    0.65
   0 -12   0    0.78    0.28
   0  12   0    0.51    0.26
  -1 -12   0   88.05    2.50
   1 -12   0   92.74    2.58
  -1  12   0   90.52    2.56
   1  12   0   95.02    2.52
   2 -12   0   17.11    0.97
  -2 -12   0   19.13    0.95
  -2  12   0   17.65    1.00
   2  12   0   18.77    0.92
  -3 -12   0    0.16    0.20
   3 -12   0    0.20    0.23
  -3  12   0    0.09    0.24
   3  12   0    0.15    0.21
   4 -12   0    0.24    0.30
  -4 -12   0    0.62    0.26
  -4  12   0    0.83    0.38
   5 -12   0    1.89    0.45
  -5 -12   0    2.56    0.42
  -5  12   0    2.41    0.54
   6 -12   0   76.25    2.43
  -6 -12   0   76.05    2.16
  -6  12   0   79.29    2.55
  -7 -12   0    2.38    0.40
   7 -12   0    2.63    0.51
  -7  12   0    2.58    0.55
  -8 -12   0   11.07    0.73
  -8  12   0   11.41    1.08
  -9  12   0    0.59    0.40
 -10  12   0   28.14    1.56
 -11  12   0    6.19    0.87
 -12  12   0   19.92    1.45
 -13  12   0   59.95    2.58
 -14  12   0   32.46    1.90
 -15  12   0   10.72    1.29
 -16  12   0    4.75    0.95
 -17  12   0    5.89    1.07
 -18  12   0   10.27    1.34
 -19  12   0    0.94    0.68
   0 -13   0   -0.01    0.19
   0  13   0    0.00    0.22
   1 -13   0    1.86    0.40
  -1 -13   0    1.67    0.37
  -1  13   0    2.58    0.46
   1  13   0    2.33    0.44
   2 -13   0   28.90    1.30
  -2 -13   0   28.15    1.23
  -2  13   0   29.99    1.34
   2  13   0   29.61    1.21
  -3 -13   0   22.67    1.06
   3 -13   0   19.30    1.10
   3  13   0   22.31    1.02
  -3  13   0   21.52    1.16
  -4 -13   0    4.28    0.52
   4 -13   0    5.08    0.66
  -4  13   0    3.77    0.62
  -5 -13   0   86.29    2.42
   5 -13   0   87.80    2.67
  -5  13   0   84.14    2.73
  -6 -13   0   10.86    0.79
   6 -13   0   10.17    0.95
  -6  13   0    8.95    0.96
  -7 -13   0    1.88    0.39
   7 -13   0    1.68    0.50
  -7  13   0    1.67    0.53
  -8 -13   0   14.06    0.85
  -8  13   0   13.36    1.25
  -9  13   0    4.16    0.76
 -10  13   0    9.47    1.06
 -11  13   0    6.35    0.97
 -12  13   0   60.33    2.60
 -13  13   0    2.87    0.79
 -14  13   0   54.32    2.54
 -15  13   0    8.88    1.25
 -16  13   0    1.48    0.69
 -17  13   0    1.17    0.67
 -18  13   0    1.11    0.73
 -19  13   0   -0.57    0.52
   0 -14   0   10.18    0.80
   0  14   0    9.28    0.76
  -1 -14   0    2.58    0.48
   1 -14   0    2.66    0.49
  -1  14   0    3.73    0.57
   1  14   0    2.79    0.49
  -2 -14   0   15.23    0.93
   2 -14   0   15.15    0.98
   2  14   0   14.02    0.87
  -2  14   0   15.58    0.99
  -3 -14   0   23.61    1.15
   3 -14   0   22.63    1.22
  -3  14   0   23.28    1.27
   3  14   0   22.68    1.08
  -4 -14   0   14.23    0.88
   4 -14   0   11.93    0.93
  -4  14   0   12.34    0.99
   5 -14   0   54.76    2.06
  -5 -14   0   56.25    1.86
  -5  14   0   53.45    2.11
   6 -14   0   67.14    2.34
  -6 -14   0   67.32    2.10
  -6  14   0   65.57    2.44
  -7 -14   0    2.22    0.43
   7 -14   0    1.68    0.51
  -7  14   0    1.39    0.51
  -8 -14   0   14.07    0.89
  -8  14   0   14.80    1.20
  -9  14   0   17.70    1.32
 -10  14   0   11.75    1.27
 -11  14   0   26.94    1.71
 -12  14   0   61.41    2.68
 -13  14   0   88.17    3.34
 -14  14   0    4.41    0.93
 -15  14   0   11.74    1.43
 -16  14   0    1.31    0.72
 -17  14   0    1.51    0.72
 -18  14   0    0.69    0.66
 -19  14   0    4.52    1.03
   0 -15   0    0.19    0.28
   0  15   0    0.01    0.26
  -1 -15   0   31.26    1.43
   1 -15   0   31.27    1.45
  -1  15   0   30.84    1.44
   1  15   0   32.65    1.42
  -2 -15   0    2.68    0.49
   2 -15   0    3.61    0.58
  -2  15   0    3.66    0.62
   2  15   0    3.65    0.56
   3 -15   0   51.00    1.96
  -3 -15   0   54.53    1.90
   3  15   0   50.47    1.77
  -3  15   0   49.65    1.98
  -4 -15   0    2.98    0.52
   4 -15   0    3.28    0.61
  -4  15   0    2.48    0.57
  -5 -15   0    2.47    0.49
   5 -15   0    2.37    0.56
  -5  15   0    2.47    0.59
   6 -15   0   37.88    1.73
  -6 -15   0   36.30    1.49
  -6  15   0   33.69    1.73
  -7 -15   0    2.43    0.48
   7 -15   0    3.05    0.64
  -7  15   0    1.81    0.56
  -8 -15   0    0.12    0.30
  -8  15   0    1.22    0.48
  -9  15   0    4.82    0.85
 -10  15   0   -0.06    0.40
 -11  15   0   23.68    1.64
 -12  15   0   62.85    2.76
 -13  15   0   13.11    1.44
 -14  15   0    8.31    1.25
 -15  15   0    0.26    0.60
 -16  15   0   12.03    1.48
 -17  15   0    0.48    0.69
 -18  15   0   10.45    1.47
   0 -16   0   18.21    1.16
   0  16   0   16.13    1.11
  -1 -16   0   92.77    2.79
   1 -16   0   86.73    2.76
  -1  16   0   86.16    2.76
   1  16   0   84.68    2.66
   2 -16   0   31.83    1.54
  -2 -16   0   34.90    1.55
  -2  16   0   33.87    1.58
   2  16   0   30.93    1.42
   3 -16   0   62.00    2.27
  -3 -16   0   63.68    2.17
  -3  16   0   62.42    2.30
   4 -16   0    6.40    0.83
  -4 -16   0    6.38    0.74
  -4  16   0    4.70    0.73
   5 -16   0   30.71    1.57
  -5 -16   0   32.85    1.48
  -5  16   0   30.56    1.64
  -6 -16   0    8.64    0.86
   6 -16   0    6.53    0.86
  -6  16   0    7.64    0.95
  -7 -16   0    8.68    0.83
   7 -16   0    6.49    0.88
  -7  16   0    7.11    0.96
  -8 -16   0   23.67    1.22
  -8  16   0   24.68    1.58
  -9  16   0    4.76    0.85
 -10  16   0    7.40    1.07
 -11  16   0   -0.59    0.42
 -12  16   0   19.15    1.77
 -13  16   0    9.06    1.27
 -14  16   0    6.15    1.12
 -15  16   0   -0.06    0.55
 -16  16   0    0.54    0.65
 -17  16   0    0.22    0.71
 -18  16   0    2.46    0.94
   0 -17   0   -0.26    0.31
   0  17   0   -0.01    0.39
   1 -17   0    7.35    0.87
  -1 -17   0    7.16    0.87
  -1  17   0    7.98    0.89
   1  17   0    7.77    0.86
   2 -17   0    2.05    0.52
  -2 -17   0    1.70    0.47
  -2  17   0    1.80    0.51
   2  17   0    1.98    0.49
   3 -17   0    0.58    0.40
  -3 -17   0    0.83    0.38
  -3  17   0    0.58    0.41
   4 -17   0    1.42    0.49
  -4 -17   0    1.94    0.47
  -4  17   0    1.61    0.52
  -5 -17   0   -0.50    0.24
   5 -17   0    0.49    0.39
  -5  17   0    0.36    0.39
   6 -17   0    0.16    0.35
  -6 -17   0   -0.38    0.24
  -6  17   0    0.30    0.40
  -7 -17   0   71.31    2.35
   7 -17   0   68.35    2.59
  -7  17   0   70.44    2.77
  -8 -17   0   32.67    1.53
  -8  17   0   33.54    1.91
  -9  17   0    3.37    0.80
 -10  17   0   23.78    1.70
 -11  17   0   12.45    1.47
 -12  17   0    0.44    0.53
 -13  17   0    4.33    0.96
 -14  17   0    3.42    0.85
 -15  17   0    4.82    1.02
 -16  17   0    0.12    0.59
 -17  17   0   -0.60    0.54
 -18  17   0   14.91    1.76
   0 -18   0    3.84    0.72
   0  18   0    3.73    0.69
  -1 -18   0   12.24    1.15
   1 -18   0    8.18    0.95
  -1  18   0    9.28    0.99
   1  18   0   11.70    1.07
   2 -18   0    1.39    0.48
  -2 -18   0    1.31    0.46
  -2  18   0    1.12    0.47
  -3 -18   0    1.04    0.43
   3 -18   0    1.21    0.50
  -3  18   0    1.33    0.53
  -4 -18   0   15.18    1.10
   4 -18   0   17.28    1.26
  -4  18   0   16.18    1.24
  -5 -18   0    1.09    0.42
   5 -18   0    1.15    0.50
  -5  18   0    1.13    0.49
   6 -18   0   10.94    1.20
  -6 -18   0    8.00    0.89
  -6  18   0    7.92    1.06
  -7 -18   0   46.33    1.91
   7 -18   0   44.69    2.16
  -7  18   0   45.04    2.26
  -8 -18   0  120.74    3.44
  -8  18   0  114.62    3.98
  -9  18   0   30.87    1.94
 -10  18   0   14.29    1.61
 -11  18   0   26.67    1.94
 -12  18   0    2.25    0.80
 -13  18   0   -0.23    0.50
 -14  18   0   11.65    1.52
 -15  18   0    3.25    0.94
 -16  18   0    1.37    0.74
 -17  18   0    2.04    0.88
   0 -19   0   -0.30    0.28
   0  19   0   -0.42    0.31
  -1 -19   0    4.47    0.74
   1 -19   0    6.37    0.86
   1  19   0    3.80    0.69
  -1  19   0    2.98    0.66
  -2 -19   0    0.00    0.33
   2 -19   0   -0.18    0.35
  -2  19   0   -0.71    0.30
   3 -19   0    9.44    1.10
  -3 -19   0    9.44    1.02
  -3  19   0    8.62    1.08
   4 -19   0   18.00    1.36
  -4 -19   0   20.85    1.31
  -4  19   0   19.18    1.39
   5 -19   0    3.99    0.77
  -5 -19   0    3.19    0.63
  -5  19   0    3.93    0.80
  -6 -19   0   21.59    1.34
   6 -19   0   19.00    1.45
  -6  19   0   20.73    1.52
  -7 -19   0  100.62    3.21
   7 -19   0  107.96    3.56
  -7  19   0  107.52    3.72
  -8 -19   0   15.13    1.24
  -8  19   0   19.77    1.62
  -9  19   0    7.20    1.15
 -10  19   0   28.17    1.94
 -11  19   0    0.03    0.58
 -12  19   0    6.18    1.14
 -13  19   0    0.72    0.66
 -14  19   0   -0.32    0.59
 -15  19   0    0.22    0.66
 -16  19   0    1.03    0.79
 -17  19   0    0.40    0.72
   0 -20   0   11.42    1.19
   0  20   0   14.72    1.33
   1 -20   0    8.23    1.05
  -1 -20   0    7.71    0.98
  -1  20   0   12.65    1.25
   2 -20   0    1.46    0.57
  -2 -20   0    2.02    0.57
  -2  20   0    1.36    0.55
   3 -20   0   69.58    2.70
  -3 -20   0   68.32    2.54
  -3  20   0   62.85    2.63
   4 -20   0    2.23    0.66
  -4 -20   0    3.00    0.67
  -4  20   0    2.05    0.66
  -5 -20   0   -0.73    0.28
   5 -20   0    0.07    0.39
  -5  20   0   -0.12    0.40
  -6 -20   0    1.27    0.50
   6 -20   0    1.72    0.62
  -6  20   0    1.91    0.70
  -7 -20   0    6.75    0.89
   7 -20   0    7.22    1.05
  -7  20   0    8.22    1.20
  -8 -20   0   76.65    2.69
  -8  20   0   75.83    3.15
  -9  20   0    8.49    1.23
 -10  20   0    3.92    0.94
 -11  20   0   13.78    1.65
 -12  20   0    1.53    0.75
 -13  20   0   -0.74    0.55
 -14  20   0    0.82    0.78
 -15  20   0    2.34    0.92
 -16  20   0   10.52    1.59
 -17  20   0    1.38    0.86
   0 -21   0    0.14    0.46
   1 -21   0   -0.07    0.37
  -1 -21   0   -0.20    0.39
  -1  21   0    0.57    0.49
   2 -21   0   17.36    1.42
  -2 -21   0   17.79    1.36
  -2  21   0   16.88    1.56
   3 -21   0   26.94    1.76
  -3 -21   0   23.23    1.58
  -3  21   0   24.22    1.67
   4 -21   0   48.18    2.30
  -4 -21   0   51.59    2.27
  -4  21   0   51.08    2.40
  -5 -21   0    0.03    0.45
   5 -21   0    0.42    0.49
  -5  21   0    1.12    0.57
  -6 -21   0    0.74    0.46
   6 -21   0    1.44    0.63
  -6  21   0    1.54    0.65
   7 -21   0    3.62    0.81
  -7 -21   0    2.64    0.66
  -7  21   0    3.66    0.88
  -8 -21   0    0.39    0.41
  -8  21   0    0.88    0.59
  -9  21   0    2.50    0.79
 -10  21   0    4.07    0.96
 -11  21   0    0.74    0.63
 -12  21   0    0.32    0.66
 -13  21   0    0.71    0.76
 -14  21   0    7.16    1.32
 -15  21   0   15.01    1.83
 -16  21   0   -1.05    0.61
   0 -22   0    0.40    0.48
   1 -22   0    1.18    0.55
  -1 -22   0    1.38    0.58
  -1  22   0    0.36    0.48
   2 -22   0   40.99    2.12
  -2 -22   0   39.94    2.07
  -2  22   0   40.95    2.12
   3 -22   0   98.69    3.51
  -3 -22   0   91.97    3.32
  -3  22   0   97.50    3.51
  -4 -22   0   24.05    1.65
   4 -22   0   25.08    1.74
  -4  22   0   25.29    1.76
  -5 -22   0   -0.30    0.43
   5 -22   0    1.64    0.65
  -5  22   0    1.68    0.66
  -6 -22   0    3.12    0.70
   6 -22   0    4.02    0.90
  -6  22   0    4.60    0.98
  -7 -22   0    2.94    0.69
  -7  22   0    3.70    0.92
  -8 -22   0    6.74    0.94
  -8  22   0    6.26    1.15
  -9  22   0    7.13    1.22
 -10  22   0    0.42    0.61
 -11  22   0    1.15    0.71
 -12  22   0   10.74    1.53
 -13  22   0   -0.25    0.63
 -14  22   0    5.74    1.28
 -15  22   0    6.19    1.32
 -16  22   0    9.20    1.53
   0 -23   0   -0.42    0.39
   1 -23   0    0.74    0.51
  -1 -23   0    0.78    0.53
   2 -23   0   32.41    1.97
  -2 -23   0   28.85    1.82
  -2  23   0   26.88    1.80
  -3 -23   0   58.89    2.60
   3 -23   0   60.96    2.74
  -3  23   0   60.09    2.72
  -4 -23   0    9.61    1.20
   4 -23   0   10.33    1.34
  -4  23   0    9.38    1.25
   5 -23   0    5.95    1.06
  -5 -23   0    5.51    0.93
  -5  23   0    6.46    1.09
  -6 -23   0    3.67    0.79
   6 -23   0    3.66    0.92
  -6  23   0    5.02    1.08
  -7 -23   0   23.86    1.57
  -7  23   0   18.01    1.83
  -8 -23   0    0.79    0.51
  -8  23   0    1.00    0.75
  -9  23   0    0.96    0.71
 -10  23   0   -0.15    0.60
 -11  23   0    7.76    1.42
 -12  23   0    0.54    0.74
 -13  23   0    0.92    0.80
 -14  23   0    0.06    0.74
 -15  23   0    9.93    1.61
   0 -24   0    0.19    0.44
   1 -24   0    9.20    1.24
  -1 -24   0    9.45    1.26
   2 -24   0    0.89    0.60
  -2 -24   0    1.78    0.69
  -3 -24   0   28.22    1.83
   3 -24   0   29.13    1.98
  -3  24   0   29.75    1.96
   4 -24   0   45.38    2.45
  -4 -24   0   39.79    2.16
  -4  24   0   48.00    2.47
   5 -24   0   -0.06    0.53
  -5 -24   0    0.27    0.48
  -5  24   0   -0.33    0.52
  -6 -24   0   -0.31    0.38
   6 -24   0    0.07    0.57
  -6  24   0   -0.34    0.54
  -7 -24   0    3.01    0.78
  -7  24   0    2.03    0.91
  -8 -24   0   15.05    1.45
  -8  24   0   15.23    1.78
  -9  24   0    9.30    1.45
 -10  24   0    0.35    0.76
 -11  24   0    8.23    1.44
 -12  24   0   16.22    1.91
 -13  24   0    2.24    0.95
 -14  24   0    5.72    1.26
 -15  24   0    1.12    0.83
   0 -25   0    0.42    0.55
  -1 -25   0   10.92    1.37
   1 -25   0   10.38    1.40
  -2 -25   0   33.74    2.02
   2 -25   0   28.18    1.96
  -3 -25   0    2.42    0.70
   3 -25   0    2.15    0.74
   4 -25   0   -0.80    0.48
  -4 -25   0   -0.82    0.36
  -4  25   0   -0.27    0.53
  -5 -25   0    3.24    0.80
   5 -25   0    3.05    0.85
  -5  25   0    3.13    0.92
  -6 -25   0    2.16    0.69
   6 -25   0    2.76    0.88
  -6  25   0    3.59    0.96
  -7 -25   0    0.61    0.54
  -7  25   0    0.77    0.73
  -8 -25   0    5.02    0.92
  -8  25   0    6.87    1.28
  -9  25   0    0.61    0.73
 -10  25   0    0.75    0.78
 -11  25   0    7.47    1.44
 -12  25   0    0.64    0.80
 -13  25   0    0.97    0.88
 -14  25   0   -0.24    0.78
   0 -26   0    2.07    0.82
   1 -26   0   27.64    2.00
  -1 -26   0   25.65    1.93
  -2 -26   0   60.98    2.87
   2 -26   0   63.77    3.00
  -3 -26   0    0.08    0.54
   3 -26   0    1.54    0.72
  -4 -26   0    5.53    1.03
   4 -26   0    4.98    1.08
  -4  26   0    5.11    1.09
  -5 -26   0   -0.22    0.46
   5 -26   0   -0.39    0.50
  -5  26   0    1.09    0.71
  -6 -26   0    5.47    0.99
   6 -26   0    5.76    1.13
  -6  26   0    4.83    1.06
  -7 -26   0    1.32    0.62
  -7  26   0    1.72    0.82
  -8 -26   0   -0.14    0.44
  -8  26   0   -1.19    0.53
  -9  26   0   -0.51    0.60
 -10  26   0   -0.19    0.70
 -11  26   0    1.52    0.95
 -12  26   0   -1.05    0.68
 -13  26   0    0.29    0.86
 -14  26   0    3.06    1.19
   0 -27   0    0.41    0.58
   1 -27   0   36.03    2.30
  -1 -27   0   33.08    2.20
   2 -27   0   10.31    1.51
  -2 -27   0    7.65    1.32
  -3 -27   0   20.12    1.90
   3 -27   0   27.09    2.00
   4 -27   0   -0.54    0.49
  -4 -27   0   -0.17    0.46
   5 -27   0    0.35    0.62
  -5 -27   0    0.52    0.57
  -5  27   0   -0.67    0.61
  -6 -27   0    3.70    0.89
  -6  27   0    3.80    1.07
  -7 -27   0    4.68    0.97
  -7  27   0    3.32    1.05
  -8  27   0    0.38    0.76
  -9  27   0   -0.40    0.70
 -10  27   0    0.83    0.85
 -11  27   0    0.25    0.87
 -12  27   0    0.26    0.88
 -13  27   0    2.41    1.07
   0 -28   0   19.07    2.00
   1 -28   0    6.57    1.23
  -1 -28   0    8.24    1.36
  -2 -28   0   38.97    2.37
   2 -28   0   40.65    2.50
   3 -28   0    0.94    0.66
  -3 -28   0    0.97    0.62
   4 -28   0    1.89    0.86
  -4 -28   0    2.62    0.89
  -5 -28   0    0.20    0.58
   5 -28   0   -0.58    0.60
  -6 -28   0    3.10    0.90
  -7 -28   0   20.38    1.66
  -7  28   0   19.96    2.18
  -8  28   0    1.55    0.94
  -9  28   0   10.22    1.67
 -10  28   0    0.64    0.85
 -11  28   0   -0.92    0.78
 -12  28   0   -0.17    0.87
 -13  28   0   11.03    1.80
   0 -29   0   -0.05    0.56
   1 -29   0    7.19    1.33
  -1 -29   0    7.16    1.24
  -2 -29   0   -0.06    0.58
   2 -29   0    1.11    0.71
  -3 -29   0    2.19    0.79
   3 -29   0    1.22    0.80
  -4 -29   0    0.89    0.68
   4 -29   0    0.86    0.80
   5 -29   0   -1.30    0.58
  -5 -29   0   -0.03    0.61
  -6 -29   0   18.72    1.86
  -7 -29   0    1.32    0.70
  -8  29   0   -0.75    0.72
  -9  29   0   -0.81    0.79
 -10  29   0    1.97    1.06
 -11  29   0    0.21    0.94
 -12  29   0    1.18    1.06
   0 -30   0    0.79    0.76
   1 -30   0    0.24    0.65
  -1 -30   0    0.60    0.71
  -2 -30   0    8.29    1.34
   2 -30   0   10.67    1.61
   3 -30   0   -0.19    0.64
  -3 -30   0    0.84    0.67
  -4 -30   0    0.25    0.62
   4 -30   0   -0.18    0.68
  -5 -30   0    5.13    1.10
   5 -30   0    3.69    1.11
  -6 -30   0    3.33    0.93
  -9  30   0    6.61    1.44
 -10  30   0    1.41    1.01
 -11  30   0    0.69    0.99
   0 -31   0   -0.32    0.52
  -1 -31   0    5.55    1.23
   1 -31   0    7.09    1.35
   2 -31   0    0.69    0.77
  -2 -31   0    1.49    0.85
   3 -31   0   11.14    1.63
  -3 -31   0   11.58    1.57
   4 -31   0    0.96    0.76
  -4 -31   0    0.25    0.56
  -5 -31   0   -1.10    0.52
  -6 -31   0   22.52    1.84
   0 -32   0   -0.14    0.68
   1 -32   0    1.60    0.94
  -1 -32   0    2.12    0.97
   2 -32   0   25.03    2.40
  -2 -32   0   24.69    2.34
  -3 -32   0   -0.03    0.67
   3 -32   0    0.64    0.71
   4 -32   0    0.17    0.70
  -4 -32   0   -0.32    0.61
  -5 -32   0    8.83    1.40
   0 -33   0   -0.21    0.69
   1 -33   0    3.57    1.16
  -1 -33   0    3.91    1.16
  -2 -33   0    5.13    1.25
   2 -33   0    5.07    1.24
   3 -33   0    2.47    1.01
  -3 -33   0    2.86    1.00
  -4 -33   0    1.88    0.86
   0 -34   0    1.08    0.79
  -1 -34   0    1.17    0.90
   1 -34   0    3.41    1.10
   2 -34   0    2.66    1.02
  -2 -34   0    1.42    0.87
   3 -34   0    6.17    1.42
  -3 -34   0    4.57    1.18
  -4 -34   0    0.39    0.73
   0 -35   0   -0.20    0.72
  -1 -35   0   -0.13    0.73
   1 -35   0    0.31    0.79
   2 -35   0    9.65    1.62
  -2 -35   0    7.54    1.48
   3 -35   0    1.89    1.03
  -3 -35   0    3.29    1.10
 -17   0   1   39.21    1.57
 -16   0   1    0.11    0.31
 -15   0   1    8.81    0.72
 -14   0   1   -0.63    0.21
 -13   0   1    5.20    0.56
 -12   0   1    0.05    0.19
 -11   0   1   13.18    0.70
 -10   0   1   -0.22    0.18
  -9   0   1   -0.02    0.14
  -9   0   1    0.08    0.16
  -8   0   1   -0.09    0.10
  -8   0   1    0.15    0.14
  -7   0   1   56.18    1.39
  -7   0   1   56.63    1.38
  -6   0   1    0.19    0.11
  -6   0   1    0.12    0.11
  -5   0   1   38.15    0.92
  -5   0   1   37.64    0.92
  -4   0   1    0.33    0.09
  -4   0   1    0.15    0.08
  -3   0   1  206.01    3.96
  -2   0   1    0.11    0.06
  -1   0   1  428.20    8.35
   0   0   1   -0.50    0.02
  -2   0  -1   -0.09    0.10
  -3   0  -1  234.76    4.64
  -4   0  -1   -0.43    0.12
  -5   0  -1   98.76    2.21
  -6   0  -1   -0.03    0.12
  -7   0  -1   32.86    1.04
  -8   0  -1    1.16    0.25
  -8   0  -1    0.23    0.19
  -9   0  -1  149.83    3.44
 -10   0  -1    0.03    0.20
 -11   0  -1    1.13    0.33
 -12   0  -1    0.18    0.23
 -13   0  -1   26.72    1.20
 -14   0  -1    0.43    0.31
 -15   0  -1   17.93    1.05
 -16   0  -1    0.26    0.33
 -17   0  -1    2.22    0.54
 -18   0  -1    0.11    0.40
 -18   1   1   80.01    2.51
 -17  -1   1    0.29    0.37
 -17   1   1    0.23    0.40
 -16  -1   1    3.93    0.54
 -16   1   1    3.60    0.57
 -15  -1   1    0.01    0.25
 -15   1   1    0.19    0.30
 -14  -1   1    0.18    0.28
 -14   1   1    0.35    0.30
 -13  -1   1    4.24    0.50
 -13   1   1    5.12    0.59
 -12  -1   1   10.74    0.63
 -12   1   1   11.83    0.73
 -11  -1   1   30.00    1.04
 -11   1   1   31.49    1.15
 -10  -1   1    1.16    0.25
 -10   1   1    0.49    0.25
  -9  -1   1   13.70    0.58
  -9  -1   1   14.20    0.59
  -9   1   1   13.27    0.66
  -9   1   1   13.04    0.66
  -8  -1   1    0.19    0.12
  -8  -1   1    0.33    0.14
  -8   1   1    0.21    0.15
  -8   1   1    0.35    0.16
  -7  -1   1  104.30    2.24
  -7  -1   1  104.79    2.25
  -7   1   1  105.25    2.39
  -7   1   1  108.67    2.38
  -6  -1   1   30.48    0.79
  -6  -1   1   32.54    0.79
  -6   1   1   31.75    0.91
  -6   1   1   31.44    0.91
  -5   1   1   22.76    0.69
  -5   1   1   22.30    0.69
  -4   1   1    0.13    0.10
  -3   1   1   36.85    0.88
  -2   1   1    1.14    0.13
  -1  -1   1    0.49    0.07
  -1   1   1    0.51    0.09
   1  -1   1    0.36    0.10
  -1   1  -1    0.62    0.11
  -2   1  -1    1.67    0.18
  -3   1  -1  141.14    2.94
  -4   1  -1  371.81    7.32
  -5  -1  -1   83.21    1.89
  -5  -1  -1   83.58    1.87
  -5   1  -1   84.63    1.97
  -6  -1  -1   19.19    0.66
  -6  -1  -1   18.59    0.67
  -6   1  -1   17.48    0.72
  -7  -1  -1   29.32    0.95
  -7  -1  -1   29.72    0.93
  -7   1  -1   29.66    1.01
  -8  -1  -1  184.68    3.95
  -8  -1  -1  182.87    3.98
  -8   1  -1  186.52    4.08
  -9  -1  -1  114.47    2.76
  -9  -1  -1  122.83    2.78
  -9   1  -1  114.99    2.86
 -10  -1  -1    3.46    0.42
 -10   1  -1    3.67    0.47
 -11  -1  -1    5.25    0.52
 -11   1  -1    4.65    0.56
 -12  -1  -1   11.02    0.71
 -12   1  -1    9.88    0.74
 -13  -1  -1   18.78    0.97
 -13   1  -1   17.47    1.03
 -14  -1  -1    5.64    0.62
 -14   1  -1    4.83    0.64
 -15  -1  -1    5.15    0.64
 -15   1  -1    4.71    0.68
 -16  -1  -1    4.59    0.63
 -16   1  -1    3.69    0.62
 -17  -1  -1   -0.72    0.27
 -17   1  -1    0.33    0.38
 -18  -1  -1   -1.26    0.33
 -18   1  -1   -0.04    0.38
 -19   1  -1    0.07    0.42
 -18   2   1    1.84    0.57
 -17   2   1    7.55    0.83
 -16   2   1    4.45    0.64
 -15  -2   1   12.35    0.74
 -15   2   1   12.64    0.91
 -14  -2   1   10.92    0.69
 -14   2   1    9.68    0.86
 -13  -2   1    4.30    0.45
 -13   2   1    3.57    0.55
 -12  -2   1   12.87    0.65
 -12   2   1   14.18    0.84
 -11  -2   1   19.55    0.78
 -11   2   1   19.88    0.96
 -10  -2   1    6.67    0.44
 -10  -2   1    8.11    0.47
 -10   2   1    6.56    0.59
  -9  -2   1    2.58    0.27
  -9  -2   1    2.16    0.26
  -9   2   1    2.72    0.38
  -8  -2   1   13.38    0.49
  -8  -2   1   12.72    0.47
  -8   2   1   13.81    0.66
  -7   2   1    0.30    0.21
  -6   2   1   38.03    1.10
  -5   2   1   45.74    1.20
  -4   2   1   47.71    1.20
  -3   2   1   11.86    0.46
  -2   2   1    2.53    0.22
  -1  -2   1  226.72    4.38
   1  -2  -1  219.91    4.39
  -1   2   1  225.43    4.41
   0  -2  -1    0.97    0.12
   0  -2   1    0.92    0.12
   0   2  -1    1.25    0.13
   0   2   1    1.00    0.13
   1  -2   1  178.43    3.53
  -1   2  -1  174.67    3.54
   2  -2   1    5.09    0.32
  -2   2  -1    4.56    0.33
   3  -2   1    1.25    0.18
  -3   2  -1    1.66    0.22
  -4  -2  -1  165.03    3.32
  -4   2  -1  162.24    3.47
  -5  -2  -1    7.26    0.38
  -5   2  -1    7.04    0.47
  -6  -2  -1   24.86    0.77
  -6   2  -1   24.92    0.90
  -7  -2  -1   13.44    0.56
  -7  -2  -1   11.98    0.56
  -7   2  -1   12.04    0.65
  -8  -2  -1  233.46    4.97
  -8  -2  -1  239.38    4.96
  -8   2  -1  246.94    5.18
  -9  -2  -1   22.73    0.88
  -9  -2  -1   22.50    0.87
  -9   2  -1   22.24    0.99
 -10  -2  -1    0.09    0.18
 -10   2  -1    0.03    0.22
 -11  -2  -1    6.86    0.55
 -11   2  -1    5.46    0.62
 -12  -2  -1    7.81    0.61
 -12   2  -1    7.88    0.75
 -13  -2  -1   34.62    1.31
 -13   2  -1   33.94    1.46
 -14  -2  -1    0.88    0.32
 -14   2  -1    0.27    0.37
 -15  -2  -1   -0.09    0.27
 -15   2  -1   -0.49    0.30
 -16  -2  -1    5.33    0.64
 -16   2  -1    4.71    0.69
 -17  -2  -1    0.40    0.39
 -17   2  -1    0.64    0.43
 -18   2  -1    0.44    0.44
 -19   2  -1    0.34    0.46
 -19   3   1    1.48    0.55
 -18   3   1    2.36    0.58
 -17   3   1    1.36    0.51
 -16   3   1    0.16    0.34
 -15   3   1    0.25    0.36
 -14  -3   1   16.63    0.79
 -14   3   1   14.90    1.06
 -13  -3   1   43.54    1.30
 -13   3   1   43.45    1.66
 -12  -3   1   12.74    0.59
 -12   3   1   10.74    0.78
 -11  -3   1   84.64    2.01
 -11   3   1   87.41    2.42
 -10  -3   1   -0.08    0.14
 -10  -3   1    0.13    0.15
 -10   3   1   -0.02    0.23
  -9   3   1    4.89    0.52
  -8   3   1    1.83    0.31
  -7   3   1  213.95    4.58
  -6   3   1   71.35    1.81
  -5   3   1  162.12    3.50
  -4   3   1  124.27    2.73
   3  -3  -1   13.60    0.54
  -3   3   1   13.30    0.54
   2  -3  -1    1.03    0.18
  -2  -3   1    0.85    0.11
  -2  -3   1    0.73    0.11
  -2   3   1    1.07    0.19
   1  -3  -1    2.21    0.22
  -1  -3   1    2.19    0.18
  -1   3   1    2.14    0.22
   0  -3  -1   27.05    0.75
   0  -3   1   26.67    0.73
   0   3   1   28.71    0.77
   0   3  -1   27.61    0.73
   1  -3   1    4.91    0.31
  -1  -3  -1    5.02    0.29
  -1   3  -1    4.70    0.31
   1   3   1    4.80    0.30
   2  -3   1    6.55    0.41
  -2  -3  -1    7.62    0.37
  -2   3  -1    8.02    0.44
   3  -3   1    0.26    0.13
  -3   3  -1    0.03    0.13
   4  -3   1  214.52    4.41
  -4  -3  -1  216.48    4.28
  -4   3  -1  210.22    4.47
  -5  -3  -1  152.99    3.16
  -5   3  -1  152.90    3.39
  -6  -3  -1   92.98    2.06
  -6   3  -1   90.14    2.28
  -7  -3  -1   33.64    0.98
  -7   3  -1   34.03    1.18
  -8  -3  -1   16.24    0.70
  -8  -3  -1   17.32    0.71
  -8   3  -1   16.25    0.83
  -9  -3  -1  175.74    3.76
  -9  -3  -1  174.10    3.77
  -9   3  -1  169.31    4.03
 -10  -3  -1   13.84    0.69
 -10   3  -1   14.10    0.85
 -11  -3  -1   30.59    1.11
 -11   3  -1   29.14    1.28
 -12  -3  -1    7.93    0.60
 -12   3  -1    8.51    0.81
 -13  -3  -1   46.74    1.53
 -13   3  -1   46.97    1.80
 -14  -3  -1   26.75    1.11
 -14   3  -1   25.54    1.36
 -15  -3  -1    9.56    0.75
 -15   3  -1   10.72    1.02
 -16  -3  -1    0.31    0.29
 -16   3  -1    0.79    0.43
 -17  -3  -1   -0.21    0.31
 -17   3  -1   -0.29    0.37
 -18   3  -1   -0.40    0.41
 -19   3  -1    4.62    0.80
 -19   4   1   -0.50    0.42
 -18   4   1   -0.21    0.42
 -17   4   1    5.46    0.81
 -16   4   1    5.74    0.80
 -15   4   1    2.14    0.58
 -14   4   1   30.21    1.49
 -13   4   1   52.41    1.92
 -12   4   1    4.20    0.58
 -11   4   1    1.04    0.35
 -10   4   1   15.00    0.87
  -9   4   1    0.06    0.21
  -8   4   1    5.84    0.57
  -7   4   1    0.98    0.26
  -6   4   1    1.82    0.31
  -5   4   1  174.85    3.82
   4  -4  -1   86.49    2.05
  -4   4   1   85.94    2.09
  -3  -4   1    6.54    0.28
  -3  -4   1    6.35    0.26
   3  -4  -1    6.01    0.42
  -3   4   1    5.80    0.41
  -2  -4   1   45.38    1.08
   2  -4  -1   49.11    1.26
  -2   4   1   47.81    1.26
  -1  -4   1    9.79    0.41
   1  -4  -1   10.44    0.49
  -1   4   1    9.52    0.47
   0  -4  -1    1.30    0.19
   0  -4   1    1.44    0.20
   0   4  -1    1.32    0.19
   0   4   1    1.26    0.20
   1  -4   1    1.72    0.22
  -1  -4  -1    1.70    0.21
   1   4   1    1.52    0.22
  -1   4  -1    1.24    0.21
   2  -4   1  126.09    2.78
  -2  -4  -1  130.69    2.69
  -2   4  -1  127.97    2.81
  -3  -4  -1  193.66    3.88
   3  -4   1  189.60    4.03
  -3   4  -1  193.61    4.08
   4  -4   1   34.28    1.05
  -4  -4  -1   32.12    0.92
  -4   4  -1   32.07    1.07
   5  -4   1  389.36    7.75
  -5  -4  -1  389.17    7.58
  -5   4  -1  381.68    7.84
  -6  -4  -1   31.32    0.90
  -6   4  -1   28.53    1.07
  -7  -4  -1    2.55    0.29
  -7   4  -1    3.19    0.42
  -8  -4  -1  120.09    2.68
  -8   4  -1  118.13    3.00
  -9  -4  -1    6.03    0.49
  -9  -4  -1    6.68    0.52
  -9   4  -1    5.97    0.62
 -10  -4  -1    4.55    0.44
 -10   4  -1    3.51    0.53
 -11  -4  -1   10.01    0.63
 -11   4  -1    9.94    0.79
 -12  -4  -1    5.16    0.51
 -12   4  -1    3.87    0.59
 -13  -4  -1   12.10    0.74
 -13   4  -1   10.71    0.98
 -14  -4  -1    0.54    0.28
 -14   4  -1    0.12    0.41
 -15  -4  -1   23.19    1.05
 -15   4  -1   22.43    1.34
 -16  -4  -1    0.04    0.25
 -16   4  -1   -0.50    0.35
 -17   4  -1    3.25    0.69
 -18   4  -1    0.51    0.48
 -19   4  -1    2.66    0.70
 -20   4  -1    0.16    0.52
 -19   5   1    0.22    0.50
 -18   5   1   12.64    1.22
 -17   5   1   15.88    1.23
 -16   5   1    0.19    0.41
 -15   5   1    4.70    0.77
 -14   5   1   48.77    1.94
 -13   5   1   69.68    2.34
 -12   5   1    0.55    0.35
 -11   5   1    0.14    0.27
 -10   5   1    0.16    0.25
  -9   5   1    2.72    0.45
  -8   5   1    0.26    0.22
  -7   5   1    0.41    0.22
  -6   5   1    9.06    0.60
   5  -5  -1  128.43    2.95
  -5   5   1  131.35    3.04
   4  -5  -1  128.64    2.93
  -4  -5   1  131.55    2.63
  -4  -5   1  129.38    2.64
  -4   5   1  129.38    2.98
  -3  -5   1   58.06    1.31
  -3  -5   1   57.62    1.32
   3  -5  -1   57.57    1.53
  -3   5   1   56.09    1.53
   2  -5  -1   65.94    1.67
  -2  -5   1   66.88    1.52
  -2   5   1   67.20    1.69
  -1  -5   1  308.79    6.17
   1  -5  -1  304.80    6.27
   1   5  -1  320.71    6.17
  -1   5   1  314.41    6.28
   0  -5  -1  349.29    7.05
   0  -5   1  356.12    7.03
   0   5  -1  365.81    7.04
   0   5   1  349.60    7.06
  -1  -5  -1   16.94    0.63
   1  -5   1   17.31    0.66
  -1   5  -1   15.78    0.66
   1   5   1   16.65    0.64
  -2  -5  -1   19.39    0.67
   2  -5   1   18.92    0.72
  -2   5  -1   18.03    0.72
   3  -5   1  226.57    4.67
  -3  -5  -1  216.05    4.49
  -3   5  -1  223.49    4.70
   4  -5   1  804.55   15.17
  -4  -5  -1  753.97   15.47
  -4   5  -1  780.82   15.21
   5  -5   1   61.77    1.70
  -5  -5  -1   65.68    1.57
  -5   5  -1   60.68    1.76
   6  -5   1   10.73    0.62
  -6  -5  -1    9.84    0.50
  -6   5  -1   10.52    0.66
  -7  -5  -1    7.33    0.46
  -7   5  -1    7.61    0.67
  -8  -5  -1    0.34    0.19
  -8   5  -1    0.45    0.27
  -9  -5  -1    7.00    0.52
  -9   5  -1    7.45    0.73
 -10  -5  -1    1.27    0.28
 -10   5  -1    1.61    0.41
 -11  -5  -1    1.21    0.28
 -11   5  -1    0.72    0.35
 -12  -5  -1    4.02    0.45
 -13  -5  -1    1.37    0.34
 -13   5  -1    0.97    0.44
 -14  -5  -1    4.94    0.52
 -14   5  -1    3.49    0.68
 -15  -5  -1    0.93    0.33
 -15   5  -1    0.10    0.39
 -16  -5  -1    1.56    0.36
 -16   5  -1    1.60    0.55
 -17   5  -1    0.58    0.45
 -18   5  -1    6.15    0.92
 -19   5  -1    1.68    0.63
 -20   5  -1    2.14    0.69
 -20   6   1    1.98    0.70
 -19   6   1    0.68    0.57
 -18   6   1   -0.39    0.41
 -17   6   1    2.12    0.61
 -16   6   1   20.37    1.34
 -15   6   1   -0.08    0.41
 -14   6   1    5.12    0.77
 -13   6   1   13.84    1.04
 -12   6   1   37.68    1.62
 -11   6   1   11.13    0.85
 -10   6   1   16.81    0.99
  -9   6   1    0.57    0.29
  -8   6   1    8.85    0.68
  -7   6   1    1.54    0.34
  -6  -6   1  109.07    2.24
  -6  -6   1  107.74    2.26
   6  -6  -1  103.60    2.59
  -6   6   1  106.90    2.72
  -5  -6   1   46.73    1.09
   5  -6  -1   43.23    1.36
  -5  -6   1   43.42    1.09
  -5   6   1   45.02    1.43
  -4  -6   1   13.36    0.51
   4  -6  -1   12.91    0.67
  -4  -6   1   13.15    0.50
  -4   6   1   14.62    0.72
   3  -6  -1   27.46    0.99
  -3  -6   1   28.95    0.83
  -3   6   1   29.29    1.03
   2  -6  -1  275.36    5.71
  -2  -6   1  287.84    5.55
  -2   6   1  265.52    5.71
   1  -6  -1    0.32    0.17
  -1  -6   1    0.49    0.16
   1   6  -1    0.59    0.18
  -1   6   1    0.41    0.19
   0  -6  -1   31.66    0.99
   0  -6   1   30.04    0.96
   0   6   1   29.88    0.98
   0   6  -1   30.66    0.96
  -1  -6  -1    3.92    0.36
   1  -6   1    3.26    0.33
   1   6   1    3.99    0.37
  -1   6  -1    3.47    0.35
  -2  -6  -1  137.12    2.93
   2  -6   1  133.91    3.03
   2   6   1  133.21    2.94
  -2   6  -1  131.12    3.05
   3  -6   1  246.93    5.12
  -3  -6  -1  239.94    4.93
  -3   6  -1  238.41    5.13
   4  -6   1   59.72    1.68
  -4  -6  -1   58.14    1.48
  -4   6  -1   60.23    1.71
  -5  -6  -1  184.86    3.95
   5  -6   1  185.74    4.13
  -5   6  -1  189.09    4.22
   6  -6   1   67.50    1.91
  -6  -6  -1   71.92    1.76
  -6   6  -1   68.44    2.01
   7  -6   1    0.19    0.19
  -7  -6  -1    0.27    0.17
  -7   6  -1    0.38    0.24
  -8  -6  -1    8.06    0.53
  -8   6  -1    7.72    0.74
  -9  -6  -1   47.31    1.38
  -9   6  -1   43.92    1.67
 -10   6  -1    0.47    0.36
 -11  -6  -1    5.77    0.51
 -11   6  -1    4.88    0.67
 -12  -6  -1    0.90    0.27
 -13  -6  -1    7.51    0.59
 -13   6  -1    6.91    0.86
 -14  -6  -1    2.07    0.37
 -14   6  -1    2.19    0.55
 -15  -6  -1    5.27    0.54
 -15   6  -1    4.05    0.74
 -16   6  -1    0.01    0.42
 -17   6  -1   10.19    1.13
 -18   6  -1   11.07    1.21
 -19   6  -1    0.11    0.51
 -20   6  -1    3.22    0.78
 -20   7   1    0.53    0.62
 -19   7   1   -0.51    0.52
 -18   7   1   -0.80    0.39
 -17   7   1    0.78    0.52
 -16   7   1    3.07    0.70
 -15   7   1    5.44    0.84
 -14   7   1    9.21    1.02
 -13   7   1    2.99    0.59
 -12   7   1   19.81    1.20
 -11   7   1    1.12    0.40
 -10   7   1    9.73    0.89
  -9   7   1  172.48    4.25
  -8   7   1   57.27    1.90
   7  -7  -1   34.94    1.26
  -7  -7   1   35.60    0.96
  -7  -7   1   34.87    0.94
  -7   7   1   34.75    1.35
  -6  -7   1   85.24    1.89
  -6  -7   1   86.22    1.92
   6  -7  -1   83.22    2.25
  -6   7   1   83.46    2.34
   5  -7  -1    0.85    0.26
  -5  -7   1    0.55    0.16
  -5  -7   1    0.57    0.16
  -5   7   1    0.29    0.21
   4  -7  -1   50.91    1.54
  -4  -7   1   50.23    1.29
  -4   7   1   51.27    1.57
   3  -7  -1   34.66    1.18
  -3  -7   1   34.64    1.01
  -3   7   1   35.52    1.22
   2  -7  -1  182.43    4.00
  -2  -7   1  177.47    3.82
  -2   7   1  183.21    4.02
  -1  -7   1    2.84    0.32
   1  -7  -1    2.74    0.35
  -1   7   1    4.01    0.43
   1   7  -1    2.89    0.34
   0  -7   1    0.41    0.18
   0   7   1    0.32    0.18
   0   7  -1    0.05    0.15
  -1  -7  -1   13.41    0.63
   1  -7   1   13.46    0.66
   1   7   1   12.34    0.62
  -1   7  -1   13.22    0.65
   2  -7   1    0.25    0.18
  -2  -7  -1    0.04    0.14
  -2   7  -1    1.10    0.26
   2   7   1    0.40    0.19
   3  -7   1  120.87    2.87
  -3  -7  -1  117.90    2.70
  -3   7  -1  119.98    2.91
   4  -7   1  245.80    5.18
  -4  -7  -1  242.57    4.96
  -4   7  -1  230.75    5.21
   5  -7   1    1.18    0.28
  -5  -7  -1    0.70    0.20
  -5   7  -1    0.33    0.24
  -6  -7  -1    2.12    0.31
   6  -7   1    2.47    0.38
  -6   7  -1    2.36    0.42
  -7  -7  -1   10.31    0.59
   7  -7   1    9.56    0.66
  -7   7  -1   10.22    0.74
   8  -7   1   14.37    0.84
  -8  -7  -1   14.39    0.72
  -8   7  -1   13.10    0.89
  -9   7  -1   38.33    1.59
 -10   7  -1  190.17    4.74
 -11  -7  -1    1.11    0.28
 -11   7  -1    0.09    0.34
 -12  -7  -1    2.36    0.37
 -12   7  -1    2.07    0.53
 -13  -7  -1   16.92    0.83
 -13   7  -1   17.98    1.22
 -14  -7  -1   19.50    0.88
 -14   7  -1   17.83    1.26
 -15   7  -1    5.79    0.87
 -16   7  -1   -0.09    0.40
 -17   7  -1   11.25    1.22
 -18   7  -1    2.01    0.69
 -19   7  -1    1.41    0.70
 -20   7  -1   -0.47    0.48
 -20   8   1    0.05    0.56
 -19   8   1    3.40    0.87
 -18   8   1   -0.24    0.47
 -17   8   1    4.54    0.86
 -16   8   1    0.36    0.45
 -15   8   1    0.07    0.38
 -14   8   1    0.14    0.35
 -13   8   1   12.96    1.06
 -12   8   1    0.33    0.37
 -11   8   1    0.31    0.33
 -10   8   1  113.87    3.25
  -9  -8   1    6.13    0.47
  -9   8   1    6.11    0.78
   8  -8  -1   99.77    2.69
  -8  -8   1  101.75    2.28
  -8  -8   1  104.52    2.30
  -8   8   1   99.71    2.87
  -7  -8   1    0.41    0.15
   7  -8  -1    0.66    0.27
  -7  -8   1    0.90    0.19
  -7   8   1    0.60    0.29
   6  -8  -1    3.45    0.46
  -6  -8   1    3.29    0.33
  -6  -8   1    3.37    0.32
  -6   8   1    1.86    0.38
  -5  -8   1  106.35    2.41
   5  -8  -1  106.29    2.72
  -5  -8   1  109.16    2.42
  -5   8   1  104.65    2.77
  -4  -8   1   38.08    1.15
   4  -8  -1   43.12    1.40
  -4   8   1   41.67    1.44
   3  -8  -1   13.08    0.73
  -3  -8   1   14.61    0.64
  -3   8   1   13.51    0.75
  -2  -8   1    1.32    0.25
   2  -8  -1    1.66    0.33
  -2   8   1    1.88    0.35
   2   8  -1    3.66    0.37
   1  -8  -1  181.53    4.03
  -1  -8   1  184.77    3.94
   1   8  -1  179.56    3.90
  -1   8   1  174.76    4.01
   0  -8   1   82.41    2.05
   0  -8  -1   75.54    2.03
   0   8  -1   76.47    2.01
   0   8   1   78.46    2.05
  -1  -8  -1    2.13    0.31
   1  -8   1    1.68    0.31
  -1   8  -1    2.12    0.34
   1   8   1    2.79    0.37
   2  -8   1   26.16    1.00
  -2  -8  -1   21.88    0.87
  -2   8  -1   22.97    0.96
   2   8   1   23.62    0.90
   3  -8   1   98.10    2.49
  -3  -8  -1   94.05    2.32
  -3   8  -1   96.79    2.52
   4  -8   1   38.47    1.32
  -4  -8  -1   35.28    1.14
  -4   8  -1   36.42    1.34
   5  -8   1    0.70    0.26
  -5  -8  -1    0.41    0.18
  -5   8  -1    0.40    0.26
   6  -8   1   37.65    1.36
  -6  -8  -1   35.69    1.18
  -6   8  -1   37.12    1.44
  -7  -8  -1    0.23    0.17
   7  -8   1    0.58    0.25
  -7   8  -1    0.20    0.25
   8  -8   1   70.03    2.09
  -8  -8  -1   69.60    1.88
  -8   8  -1   66.99    2.24
  -9   8  -1  236.42    5.64
 -10   8  -1    4.68    0.75
 -11   8  -1   32.28    1.58
 -12  -8  -1   13.54    0.74
 -12   8  -1   14.17    1.08
 -13  -8  -1   17.28    0.84
 -13   8  -1   18.46    1.28
 -14  -8  -1    1.53    0.35
 -14   8  -1    1.40    0.52
 -15   8  -1    1.85    0.61
 -16   8  -1    1.43    0.59
 -17   8  -1   -0.01    0.54
 -18   8  -1   10.25    1.24
 -19   8  -1   -0.80    0.51
 -20   8  -1    0.38    0.61
 -20   9   1    0.90    0.69
 -19   9   1   -1.00    0.52
 -18   9   1    6.74    1.05
 -17   9   1   26.70    1.69
 -16   9   1    0.52    0.54
 -15   9   1    0.12    0.46
 -14   9   1    2.70    0.64
 -13   9   1   18.32    1.29
 -12   9   1   16.32    1.19
 -11   9   1    9.51    0.96
 -10   9   1    3.14    0.60
  -9   9   1  224.65    5.42
   8  -9  -1   46.65    1.65
  -8  -9   1   43.52    1.26
  -8  -9   1   44.20    1.27
  -8   9   1   45.41    1.75
  -7  -9   1    1.30    0.23
   7  -9  -1    1.70    0.39
  -7  -9   1    1.60    0.25
  -7   9   1    1.65    0.40
   6  -9  -1   65.71    1.97
  -6  -9   1   59.95    1.61
  -6  -9   1   63.91    1.64
  -6   9   1   64.48    2.04
  -5  -9   1   78.15    1.94
   5  -9  -1   76.99    2.22
  -5   9   1   77.83    2.31
   4  -9  -1   14.44    0.82
  -4  -9   1   13.82    0.66
  -4   9   1   14.76    0.84
   3  -9  -1    0.69    0.26
  -3  -9   1    1.09    0.25
  -3   9   1    1.44    0.33
  -2  -9   1   63.15    1.72
   2  -9  -1   60.91    1.83
   2   9  -1   61.99    1.67
  -2   9   1   60.93    1.84
  -1  -9   1  429.37    8.80
   1  -9  -1  445.21    8.92
   1   9  -1  445.51    8.78
  -1   9   1  421.45    8.88
   0  -9   1   69.07    1.92
   0  -9  -1   70.95    1.95
   0   9  -1   69.38    1.90
   0   9   1   68.29    1.93
  -1  -9  -1    0.35    0.21
   1  -9   1    0.61    0.25
  -1   9  -1    0.32    0.22
   1   9   1    0.97    0.27
  -2  -9  -1   39.27    1.30
   2  -9   1   40.15    1.39
   2   9   1   39.65    1.28
  -2   9  -1   43.39    1.43
  -3  -9  -1   22.80    0.93
   3  -9   1   23.70    1.03
  -3   9  -1   22.54    1.03
   3   9   1   25.91    0.95
  -4  -9  -1   21.47    0.89
   4  -9   1   20.88    0.99
  -4   9  -1   23.61    1.08
   5  -9   1   32.61    1.27
  -5  -9  -1   32.98    1.12
  -5   9  -1   29.90    1.31
   6  -9   1    0.23    0.22
  -6  -9  -1    0.38    0.20
  -6   9  -1    0.19    0.25
   7  -9   1    5.24    0.59
  -7  -9  -1    5.01    0.49
  -7   9  -1    4.22    0.59
   8  -9   1   12.67    0.87
  -8   9  -1   13.12    0.96
  -9   9  -1  105.89    3.17
 -10   9  -1  174.50    4.60
 -11   9  -1    0.52    0.38
 -12   9  -1    0.28    0.38
 -13  -9  -1    4.11    0.50
 -13   9  -1    3.31    0.71
 -14  -9  -1    8.59    0.63
 -14   9  -1    8.00    1.02
 -15   9  -1    4.07    0.81
 -16   9  -1    4.82    0.90
 -17   9  -1   24.42    1.72
 -18   9  -1    0.62    0.63
 -19   9  -1    0.17    0.55
 -20   9  -1    0.32    0.62
 -20  10   1    0.60    0.65
 -19  10   1   -0.81    0.51
 -18  10   1    2.22    0.77
 -17  10   1    6.33    1.05
 -16  10   1   16.81    1.57
 -15  10   1    0.03    0.44
 -14  10   1    0.27    0.45
 -13  10   1   14.66    1.20
 -12  10   1   22.75    1.44
 -11  10   1    0.64    0.40
 -10  10   1   41.98    1.82
  -9  10   1    0.39    0.38
  -8 -10   1   34.38    1.14
  -8  10   1   39.01    1.64
   7 -10  -1   19.69    1.07
  -7 -10   1   18.86    0.79
  -7 -10   1   19.35    0.79
  -7  10   1   20.35    1.13
  -6 -10   1   17.48    0.77
   6 -10  -1   18.39    1.00
  -6 -10   1   18.42    0.77
  -6  10   1   15.83    0.98
  -5 -10   1   75.68    1.95
   5 -10  -1   74.04    2.21
  -5  10   1   73.85    2.29
   4 -10  -1    0.75    0.28
  -4 -10   1    1.25    0.26
  -4  10   1    0.80    0.31
   3 -10  -1    2.07    0.38
  -3 -10   1    2.12    0.33
  -3  10   1    1.89    0.38
  -2 -10   1  268.83    5.76
   2 -10  -1  262.64    5.90
   2  10  -1  272.61    5.70
  -2  10   1  278.74    5.95
   1 -10  -1  104.47    2.75
  -1 -10   1  105.29    2.68
   1  10  -1  107.73    2.65
  -1  10   1  107.49    2.77
   0 -10   1  142.04    3.41
   0 -10  -1  140.08    3.42
   0  10   1  145.01    3.43
   0  10  -1  143.48    3.39
   1 -10   1    0.77    0.29
  -1 -10  -1   -0.05    0.17
  -1  10  -1    0.10    0.22
   1  10   1    0.54    0.23
   2 -10   1   29.02    1.18
  -2 -10  -1   29.94    1.13
  -2  10  -1   28.02    1.17
   2  10   1   28.72    1.10
  -3 -10  -1   43.95    1.43
   3 -10   1   44.64    1.55
  -3  10  -1   43.58    1.56
   3  10   1   44.35    1.41
  -4 -10  -1    4.48    0.47
   4 -10   1    3.37    0.48
  -4  10  -1    3.87    0.54
   5 -10   1    2.96    0.47
  -5 -10  -1    3.42    0.42
  -5  10  -1    4.14    0.58
   6 -10   1    0.92    0.32
  -6 -10  -1    0.66    0.23
  -6  10  -1    0.57    0.30
   7 -10   1   22.70    1.12
  -7  10  -1   21.47    1.19
   8 -10   1    7.74    0.79
  -8  10  -1    5.00    0.72
  -9  10  -1   65.30    2.36
 -10  10  -1    5.82    0.79
 -11  10  -1    3.05    0.61
 -12  10  -1    1.09    0.51
 -13 -10  -1    1.07    0.33
 -13  10  -1    0.72    0.50
 -14  10  -1   26.06    1.64
 -15  10  -1    2.65    0.71
 -16  10  -1   13.44    1.43
 -17  10  -1   22.71    1.68
 -18  10  -1    0.65    0.59
 -19  10  -1   -0.56    0.51
 -20  10  -1    7.48    1.18
 -20  11   1    2.72    0.86
 -19  11   1   -0.02    0.61
 -18  11   1    5.94    1.04
 -17  11   1   32.80    1.98
 -16  11   1    0.08    0.52
 -15  11   1    2.37    0.71
 -14  11   1    4.84    0.88
 -13  11   1    0.09    0.40
 -12  11   1    1.81    0.60
 -11  11   1    2.39    0.63
 -10  11   1    5.63    0.81
  -9  11   1    5.43    0.77
  -8 -11   1    1.04    0.27
  -8  11   1    0.63    0.39
   7 -11  -1    4.68    0.64
  -7 -11   1    5.09    0.49
  -7  11   1    5.04    0.69
  -6 -11   1    2.75    0.37
   6 -11  -1    2.55    0.49
  -6  11   1    2.65    0.52
   5 -11  -1    5.64    0.68
  -5 -11   1    5.79    0.53
  -5  11   1    5.39    0.66
  -4 -11   1   98.75    2.52
   4 -11  -1   96.10    2.74
  -4  11   1  102.81    2.84
  -3 -11   1    2.66    0.39
   3 -11  -1    3.58    0.51
  -3  11   1    2.71    0.46
   3  11  -1    4.83    0.48
  -2 -11   1   29.73    1.15
   2 -11  -1   28.55    1.25
   2  11  -1   29.72    1.11
  -2  11   1   26.60    1.21
  -1 -11   1  347.47    7.35
   1 -11  -1  338.93    7.43
   1  11  -1  358.38    7.32
  -1  11   1  351.42    7.46
   0 -11  -1   64.45    1.97
   0  11   1   66.98    1.98
   0  11  -1   65.27    1.95
   1 -11   1    5.32    0.57
  -1 -11  -1    5.61    0.57
  -1  11  -1    6.63    0.65
   1  11   1    5.90    0.59
  -2 -11  -1   65.91    1.98
   2 -11   1   67.79    2.07
  -2  11  -1   67.54    2.09
   2  11   1   70.67    1.98
  -3 -11  -1  101.82    2.62
   3 -11   1  104.21    2.76
   3  11   1  100.03    2.57
  -3  11  -1   95.26    2.75
  -4 -11  -1    1.95    0.36
   4 -11   1    2.11    0.41
  -4  11  -1    1.82    0.41
   5 -11   1   33.44    1.40
  -5 -11  -1   34.69    1.25
  -5  11  -1   31.67    1.42
  -6 -11  -1   67.79    1.93
   6 -11   1   64.95    2.14
  -6  11  -1   70.10    2.30
   7 -11   1    2.21    0.46
  -7  11  -1    2.18    0.50
   8 -11   1    3.61    0.57
  -8  11  -1    2.58    0.54
  -9  11  -1   13.09    1.04
 -10  11  -1    1.62    0.50
 -11  11  -1    2.08    0.56
 -12  11  -1    0.09    0.42
 -13  11  -1   22.59    1.52
 -14 -11  -1   27.05    1.11
 -14  11  -1   26.02    1.69
 -15  11  -1    5.65    0.98
 -16  11  -1   11.11    1.33
 -17  11  -1    7.82    1.17
 -18  11  -1   20.16    1.65
 -19  11  -1   -0.10    0.56
 -19  12   1   -0.43    0.57
 -18  12   1    2.50    0.80
 -17  12   1    3.01    0.81
 -16  12   1   12.04    1.39
 -15  12   1    1.84    0.69
 -14  12   1   25.74    1.69
 -13  12   1    2.31    0.66
 -12  12   1    0.16    0.45
 -11  12   1    0.22    0.40
 -10  12   1    7.36    0.93
  -9 -12   1    0.35    0.23
  -9  12   1    0.21    0.36
  -8 -12   1   24.08    1.01
  -8  12   1   22.25    1.33
   7 -12  -1    5.80    0.72
  -7 -12   1    4.84    0.52
  -7  12   1    5.23    0.73
   6 -12  -1   55.87    1.99
  -6 -12   1   57.38    1.72
  -6  12   1   56.01    2.08
  -5 -12   1    1.17    0.30
   5 -12  -1    0.32    0.35
  -5  12   1    1.12    0.44
   4 -12  -1  154.67    3.90
  -4 -12   1  149.94    3.63
  -4  12   1  155.01    3.99
  -3 -12   1   67.07    1.96
   3 -12  -1   69.41    2.14
  -3  12   1   65.75    2.14
   3  12  -1   61.41    1.84
   2 -12  -1   55.11    1.88
  -2 -12   1   60.65    1.82
   2  12  -1   53.90    1.72
  -2  12   1   58.15    1.93
   1 -12  -1    4.87    0.61
  -1 -12   1    3.87    0.51
   1  12  -1    5.55    0.59
  -1  12   1    5.78    0.65
   0 -12   1    8.62    0.68
   0 -12  -1    6.34    0.65
   0  12   1    8.03    0.75
   0  12  -1    7.22    0.66
   1 -12   1    1.24    0.35
  -1 -12  -1    1.59    0.35
   1  12   1    1.54    0.36
  -1  12  -1    1.59    0.39
  -2 -12  -1    0.53    0.25
   2 -12   1    0.34    0.24
  -2  12  -1    0.14    0.24
   2  12   1    0.94    0.30
  -3 -12  -1    1.18    0.33
   3 -12   1    1.46    0.37
  -3  12  -1    1.36    0.36
   3  12   1    1.54    0.36
  -4 -12  -1    1.22    0.32
   4 -12   1    1.18    0.38
  -4  12  -1    0.34    0.30
   5 -12   1   57.58    1.98
  -5 -12  -1   56.20    1.79
  -5  12  -1   57.38    2.07
  -6 -12  -1   26.09    1.13
   6 -12   1   27.38    1.32
  -6  12  -1   24.58    1.35
   7 -12   1    1.17    0.39
  -7 -12  -1    1.18    0.32
  -7  12  -1    0.71    0.39
   8 -12   1    0.35    0.34
  -8  12  -1    0.17    0.32
  -9  12  -1    7.23    0.90
 -10  12  -1   16.31    1.23
 -11  12  -1    1.06    0.49
 -12  12  -1    7.81    1.09
 -13  12  -1    6.39    1.02
 -14 -12  -1   58.25    1.82
 -14  12  -1   62.48    2.69
 -15  12  -1   21.69    1.64
 -16  12  -1    1.04    0.58
 -17  12  -1   12.16    1.43
 -18  12  -1   -0.36    0.55
 -19  12  -1    1.70    0.79
 -19  13   1   -0.17    0.55
 -18  13   1    2.59    0.81
 -17  13   1    0.91    0.65
 -16  13   1    0.80    0.60
 -15  13   1    2.56    0.79
 -14  13   1    8.51    1.15
 -13  13   1   36.20    2.00
 -12  13   1   42.20    2.11
 -11  13   1    7.10    1.01
 -10  13   1   26.33    1.57
  -9 -13   1   38.97    1.40
  -9  13   1   43.41    1.95
  -8 -13   1   21.44    1.03
  -8  13   1   23.24    1.40
   7 -13  -1   90.46    2.79
  -7 -13   1   88.34    2.40
  -7  13   1   86.29    2.87
   6 -13  -1   96.36    2.94
  -6 -13   1  102.87    2.67
  -6  13   1   96.69    3.05
   5 -13  -1  191.60    4.83
  -5 -13   1  196.25    4.55
  -5  13   1  208.69    5.05
  -4 -13   1   48.46    1.63
   4 -13  -1   44.30    1.79
  -4  13   1   50.55    1.92
   3 -13  -1   17.07    1.04
  -3 -13   1   16.73    0.92
  -3  13   1   18.30    1.08
   3  13  -1   17.44    0.89
   2 -13  -1    0.52    0.28
  -2 -13   1    0.58    0.26
  -2  13   1    0.91    0.35
   2  13  -1    0.40    0.26
   1 -13  -1   21.77    1.11
  -1 -13   1   21.49    1.06
  -1  13   1   22.47    1.12
   1  13  -1   20.68    1.02
   0 -13   1    9.89    0.75
   0 -13  -1    8.80    0.72
   0  13  -1    9.64    0.73
   0  13   1    9.78    0.76
  -1 -13  -1    2.24    0.42
   1 -13   1    2.51    0.46
   1  13   1    3.49    0.52
  -1  13  -1    2.94    0.50
  -2 -13  -1    0.91    0.31
   2 -13   1    1.06    0.33
  -2  13  -1    1.24    0.35
   2  13   1    1.11    0.33
  -3 -13  -1    4.26    0.54
   3 -13   1    3.33    0.54
  -3  13  -1    4.79    0.66
   3  13   1    5.44    0.62
  -4 -13  -1    1.01    0.31
   4 -13   1    0.23    0.28
  -4  13  -1    0.01    0.29
   5 -13   1    9.55    0.93
  -5 -13  -1    8.98    0.79
  -5  13  -1    6.82    0.81
  -6 -13  -1   21.88    1.07
   6 -13   1   22.15    1.24
  -6  13  -1   17.93    1.22
  -7 -13  -1   11.26    0.79
   7 -13   1   11.05    1.03
  -7  13  -1   11.97    1.16
   8 -13   1    4.66    0.70
  -8  13  -1    4.74    0.76
  -9  13  -1    0.70    0.44
 -10  13  -1   21.58    1.44
 -11  13  -1    0.21    0.42
 -12  13  -1   26.43    1.70
 -13  13  -1   64.02    2.75
 -14 -13  -1   32.27    1.32
 -14  13  -1   34.72    2.06
 -15  13  -1   19.32    1.56
 -16  13  -1    0.70    0.60
 -17  13  -1    0.62    0.69
 -18  13  -1    3.30    0.94
 -19  13  -1    0.56    0.72
 -19  14   1   -0.34    0.59
 -18  14   1    0.43    0.68
 -17  14   1    0.86    0.67
 -16  14   1    1.53    0.74
 -15  14   1    6.83    1.11
 -14  14   1   10.74    1.32
 -13  14   1   18.95    1.53
 -12  14   1   43.42    2.20
 -11  14   1    4.07    0.84
 -10  14   1    6.59    0.97
  -9 -14   1    0.65    0.29
  -9  14   1    0.29    0.40
  -8 -14   1   65.99    2.03
  -8  14   1   66.14    2.53
  -7 -14   1    8.30    0.75
   7 -14  -1    7.29    0.89
  -7  14   1    7.56    0.93
  -6 -14   1  161.92    3.92
   6 -14  -1  161.98    4.27
  -6  14   1  160.15    4.41
  -5 -14   1   27.97    1.23
   5 -14  -1   25.22    1.43
  -5  14   1   26.66    1.50
  -4 -14   1   58.78    1.92
   4 -14  -1   60.49    2.14
  -4  14   1   56.57    2.12
  -3 -14   1   37.28    1.46
   3 -14  -1   37.96    1.61
   3  14  -1   36.62    1.39
  -3  14   1   38.00    1.63
  -2 -14   1   17.36    1.00
   2 -14  -1   18.76    1.09
  -2  14   1   18.74    1.10
   2  14  -1   17.38    0.96
  -1 -14   1    0.84    0.31
   1 -14  -1    0.68    0.31
  -1  14   1    0.77    0.32
   1  14  -1    0.32    0.26
   0 -14  -1   31.01    1.39
   0 -14   1   33.28    1.42
   0  14   1   33.49    1.42
   0  14  -1   32.50    1.38
   1 -14   1    2.33    0.48
  -1 -14  -1    1.13    0.37
   1  14   1    2.41    0.47
  -1  14  -1    1.07    0.37
  -2 -14  -1    2.19    0.43
   2 -14   1    1.94    0.44
   2  14   1    1.85    0.42
  -2  14  -1    1.89    0.44
   3 -14   1   23.96    1.25
  -3 -14  -1   23.64    1.17
  -3  14  -1   21.65    1.21
   3  14   1   21.13    1.08
  -4 -14  -1   11.93    0.86
   4 -14   1   12.97    0.95
  -4  14  -1   11.89    0.96
  -5 -14  -1    4.62    0.60
   5 -14   1    4.42    0.68
  -5  14  -1    3.43    0.66
  -6 -14  -1    5.68    0.66
   6 -14   1    5.65    0.78
  -6  14  -1    2.85    0.62
   7 -14   1   29.88    1.52
  -7 -14  -1   31.41    1.34
  -7  14  -1   30.69    1.62
  -8  14  -1   14.54    1.16
  -9  14  -1   20.19    1.39
 -10  14  -1    3.01    0.69
 -11  14  -1   12.47    1.36
 -12  14  -1   27.69    1.82
 -13  14  -1    0.32    0.60
 -14  14  -1   24.02    1.73
 -15  14  -1    2.01    0.78
 -16  14  -1   14.32    1.61
 -17  14  -1    0.59    0.67
 -18  14  -1    0.85    0.73
 -19  14  -1    2.20    0.91
 -18  15   1    0.06    0.69
 -17  15   1    2.11    0.82
 -16  15   1    2.01    0.81
 -15  15   1    0.61    0.65
 -14  15   1    0.30    0.51
 -13  15   1   28.37    1.89
 -12  15   1   36.33    2.08
 -11  15   1    3.30    0.81
 -10  15   1    0.75    0.52
  -9 -15   1    3.80    0.53
  -9  15   1    2.65    0.66
  -8 -15   1    0.15    0.27
  -8  15   1   -0.40    0.31
  -7 -15   1   19.41    1.08
   7 -15  -1   21.81    1.36
  -7  15   1   18.16    1.33
   6 -15  -1   76.51    2.58
  -6 -15   1   70.09    2.24
  -6  15   1   72.14    2.66
   5 -15  -1   99.47    3.08
  -5 -15   1   97.37    2.80
  -5  15   1  103.46    3.19
  -4 -15   1    1.72    0.41
   4 -15  -1    1.50    0.47
  -4  15   1    0.80    0.41
  -3 -15   1    4.52    0.62
   3 -15  -1    4.87    0.69
  -3  15   1    4.39    0.70
   3  15  -1    5.82    0.66
  -2 -15   1    0.44    0.32
   2 -15  -1    1.11    0.40
   2  15  -1    0.83    0.35
  -2  15   1    0.95    0.41
  -1 -15   1   21.33    1.18
   1 -15  -1   22.96    1.25
  -1  15   1   22.23    1.23
   1  15  -1   23.01    1.18
   0 -15  -1   -0.08    0.27
   0 -15   1    0.72    0.34
   0  15  -1    0.46    0.32
   0  15   1    0.60    0.35
   1 -15   1  136.91    3.75
  -1 -15  -1  138.36    3.73
  -1  15  -1  146.26    3.78
   1  15   1  141.88    3.70
   2 -15   1   11.76    0.93
  -2 -15  -1   12.23    0.92
   2  15   1   12.74    0.91
  -2  15  -1   12.12    0.97
   3 -15   1   79.54    2.56
  -3 -15  -1   78.32    2.45
  -3  15  -1   76.81    2.57
   3  15   1   77.79    2.37
   4 -15   1   15.95    1.07
  -4 -15  -1   15.90    1.02
  -4  15  -1   16.09    1.12
   5 -15   1   23.64    1.35
  -5 -15  -1   24.35    1.24
  -5  15  -1   27.22    1.48
   6 -15   1   11.72    1.11
  -6 -15  -1   12.81    0.92
  -6  15  -1    9.37    1.05
  -7 -15  -1   31.21    1.38
   7 -15   1   29.77    1.57
  -7  15  -1   30.58    1.69
  -8  15  -1    3.26    0.69
  -9  15  -1    1.44    0.55
 -10  15  -1    0.43    0.49
 -11  15  -1    1.68    0.67
 -12  15  -1   31.83    1.96
 -13  15  -1   25.01    1.78
 -14  15  -1    0.06    0.52
 -15  15  -1    6.72    1.15
 -16  15  -1    3.04    0.91
 -17  15  -1    1.22    0.73
 -18  15  -1    3.04    0.98
 -18  16   1    7.36    1.33
 -17  16   1    0.82    0.75
 -16  16   1    0.02    0.58
 -15  16   1   -0.52    0.49
 -14  16   1    1.71    0.72
 -13  16   1    8.76    1.24
 -12  16   1    7.93    1.19
 -11  16   1   27.66    1.82
 -10  16   1   14.25    1.50
  -9 -16   1    0.85    0.34
  -9  16   1    0.03    0.42
  -8 -16   1    3.84    0.59
  -8  16   1    2.77    0.70
   7 -16  -1   30.23    1.63
  -7 -16   1   29.87    1.39
  -7  16   1   30.19    1.70
   6 -16  -1   33.55    1.71
  -6 -16   1   34.26    1.49
  -6  16   1   36.46    1.81
   5 -16  -1   27.11    1.47
  -5 -16   1   24.82    1.27
  -5  16   1   24.65    1.48
   4 -16  -1    4.21    0.67
  -4 -16   1    3.22    0.54
  -4  16   1    3.90    0.70
   3 -16  -1    1.31    0.43
  -3 -16   1    1.50    0.44
  -3  16   1    2.22    0.53
  -2 -16   1    0.48    0.31
   2 -16  -1   -0.07    0.27
   2  16  -1   -0.26    0.25
  -2  16   1    0.22    0.32
  -1 -16   1    0.02    0.31
   1 -16  -1    0.28    0.32
   1  16  -1   -0.08    0.31
  -1  16   1   -0.03    0.32
   0 -16   1   72.18    2.47
   0 -16  -1   76.45    2.54
   0  16  -1   76.45    2.48
   0  16   1   78.78    2.54
  -1 -16  -1   -0.05    0.35
   1 -16   1   -0.10    0.32
   1  16   1   -0.43    0.31
  -1  16  -1    0.17    0.36
   2 -16   1    5.75    0.75
  -2 -16  -1    5.81    0.77
  -2  16  -1    5.00    0.73
   2  16   1    4.95    0.67
  -3 -16  -1    2.58    0.53
   3 -16   1    2.95    0.57
  -3  16  -1    3.32    0.65
   4 -16   1    0.68    0.39
  -4 -16  -1    1.10    0.42
  -4  16  -1    0.58    0.40
   5 -16   1   27.51    1.50
  -5 -16  -1   29.03    1.40
  -5  16  -1   30.17    1.60
   6 -16   1    8.07    0.96
  -6 -16  -1    9.70    0.91
  -6  16  -1    6.54    0.89
  -7 -16  -1    1.60    0.45
   7 -16   1    0.79    0.45
  -7  16  -1    1.48    0.55
  -8  16  -1   11.60    1.25
  -9  16  -1   -0.02    0.44
 -10  16  -1   -0.68    0.37
 -11  16  -1    6.67    1.12
 -12  16  -1   10.04    1.30
 -13  16  -1    3.91    0.93
 -14  16  -1   -0.58    0.44
 -15  16  -1    2.14    0.79
 -16  16  -1    8.06    1.30
 -17  16  -1    0.69    0.66
 -18  16  -1   22.09    2.12
 -18  17   1   -0.29    0.67
 -17  17   1   -0.89    0.55
 -16  17   1   -0.28    0.59
 -15  17   1    3.82    0.95
 -14  17   1   11.90    1.47
 -13  17   1    1.60    0.70
 -12  17   1    8.34    1.21
 -11  17   1   23.63    1.75
 -10  17   1   50.32    2.45
  -9 -17   1   39.62    1.64
  -9  17   1   39.17    2.10
  -8 -17   1   65.86    2.25
  -8  17   1   67.54    2.75
   7 -17  -1   14.08    1.30
  -7 -17   1   14.27    1.06
  -7  17   1   14.03    1.34
  -6 -17   1    9.47    0.93
   6 -17  -1    8.73    1.04
  -6  17   1    7.71    0.99
  -5 -17   1    3.55    0.61
   5 -17  -1    3.84    0.70
  -5  17   1    3.45    0.69
   4 -17  -1   45.94    1.97
  -4 -17   1   43.54    1.78
  -4  17   1   44.46    1.99
  -3 -17   1   39.12    1.68
   3 -17  -1   39.25    1.80
  -3  17   1   37.52    1.80
   2 -17  -1    0.81    0.37
  -2 -17   1    0.50    0.35
  -2  17   1    0.49    0.36
   2  17  -1    0.16    0.32
   1 -17  -1   -0.18    0.28
  -1 -17   1   -0.12    0.30
   1  17  -1   -0.04    0.32
  -1  17   1   -0.25    0.29
   0 -17   1   10.87    1.03
   0 -17  -1   12.78    1.15
   0  17  -1   10.38    1.01
   0  17   1    9.29    0.98
  -1 -17  -1  136.67    3.80
   1 -17   1  139.45    3.84
  -1  17  -1  123.65    3.69
   1  17   1  136.72    3.74
   2 -17   1    1.50    0.47
  -2 -17  -1    0.40    0.39
   2  17   1    1.33    0.45
  -2  17  -1    1.35    0.45
   3 -17   1   17.90    1.21
  -3 -17  -1   22.51    1.29
  -3  17  -1   20.03    1.31
  -4 -17  -1    6.56    0.82
   4 -17   1    8.34    0.97
  -4  17  -1    6.81    0.90
   5 -17   1   46.31    2.03
  -5 -17  -1   50.28    1.95
  -5  17  -1   50.11    2.16
   6 -17   1    3.01    0.66
  -6 -17  -1    5.97    0.76
  -6  17  -1    3.77    0.75
  -7 -17  -1    7.54    0.85
   7 -17   1    9.17    1.07
  -7  17  -1    8.30    1.09
  -8  17  -1   25.32    1.68
  -9  17  -1   -0.41    0.43
 -10  17  -1    4.79    0.97
 -11  17  -1   -0.29    0.54
 -12  17  -1    1.30    0.67
 -13  17  -1    2.78    0.87
 -14  17  -1    8.00    1.25
 -15  17  -1    0.00    0.55
 -16  17  -1    0.83    0.71
 -17  17  -1    1.51    0.78
 -18  17  -1    4.20    1.10
 -18  18   1    1.32    0.84
 -17  18   1    0.11    0.63
 -16  18   1   -0.08    0.55
 -15  18   1    2.67    0.86
 -14  18   1    0.79    0.63
 -13  18   1    5.58    1.07
 -12  18   1    3.63    0.88
 -11  18   1   51.72    2.60
 -10  18   1   44.07    2.34
  -9 -18   1    0.43    0.40
  -9  18   1    0.30    0.50
  -8 -18   1   56.60    2.12
  -8  18   1   53.30    2.50
   7 -18  -1   48.70    2.24
  -7 -18   1   48.50    1.97
  -7  18   1   47.77    2.30
   6 -18  -1   13.12    1.33
  -6 -18   1   13.02    1.01
  -6  18   1   11.70    1.26
   5 -18  -1    1.32    0.52
  -5 -18   1    0.74    0.38
  -5  18   1    0.54    0.44
  -4 -18   1    0.93    0.43
   4 -18  -1    0.95    0.45
  -4  18   1    1.71    0.57
  -3 -18   1   26.58    1.42
   3 -18  -1   26.42    1.54
  -3  18   1   28.20    1.59
  -2 -18   1   12.47    1.00
   2 -18  -1   11.04    1.14
  -2  18   1   10.22    1.07
  -1 -18   1   -0.03    0.31
   1 -18  -1    0.69    0.41
   1  18  -1    0.92    0.43
  -1  18   1    0.15    0.35
   0 -18   1   18.87    1.26
   0 -18  -1   19.62    1.32
   0  18  -1   20.53    1.27
   0  18   1   17.35    1.23
   1 -18   1   21.34    1.33
  -1 -18  -1   18.43    1.28
   1  18   1   21.02    1.30
  -1  18  -1   19.34    1.29
   2 -18   1    8.23    0.97
  -2 -18  -1    7.19    0.90
  -2  18  -1    7.93    0.94
  -3 -18  -1    3.89    0.66
   3 -18   1    4.51    0.74
  -3  18  -1    4.55    0.76
  -4 -18  -1   15.15    1.12
   4 -18   1   15.44    1.20
  -4  18  -1   16.80    1.27
   5 -18   1   21.28    1.38
  -5 -18  -1   18.45    1.20
  -5  18  -1   22.15    1.48
  -6 -18  -1    1.23    0.43
   6 -18   1    0.18    0.41
  -6  18  -1    2.12    0.64
   7 -18   1   55.40    2.39
  -7 -18  -1   57.54    2.17
  -7  18  -1   54.49    2.49
  -8  18  -1    0.33    0.59
  -9  18  -1    1.05    0.63
 -10  18  -1    3.55    0.96
 -11  18  -1    6.64    1.16
 -12  18  -1    0.45    0.58
 -13  18  -1    0.27    0.57
 -14  18  -1    0.09    0.60
 -15  18  -1    1.44    0.75
 -16  18  -1    0.79    0.71
 -17  18  -1    0.40    0.70
 -17  19   1    0.33    0.68
 -16  19   1    0.88    0.76
 -15  19   1    2.20    0.87
 -14  19   1   11.77    1.53
 -13  19   1   -0.29    0.56
 -12  19   1    1.22    0.71
 -11  19   1   20.32    1.91
 -10  19   1   63.89    2.93
  -9 -19   1   27.78    1.45
  -9  19   1   23.90    1.76
  -8 -19   1   80.21    2.69
  -8  19   1   76.55    3.14
   7 -19  -1   44.87    2.22
  -7 -19   1   42.87    1.94
  -7  19   1   48.68    2.36
  -6 -19   1    0.66    0.40
   6 -19  -1    0.59    0.54
  -6  19   1    1.73    0.66
  -5 -19   1    1.49    0.49
   5 -19  -1    0.89    0.51
  -5  19   1    0.39    0.49
   4 -19  -1   28.06    1.65
  -4 -19   1   32.60    1.59
  -4  19   1   29.93    1.73
  -3 -19   1    0.83    0.41
   3 -19  -1    0.20    0.42
  -3  19   1    0.14    0.43
  -2 -19   1    0.10    0.33
   2 -19  -1    0.35    0.44
  -2  19   1    1.28    0.58
   1 -19  -1    3.30    0.68
  -1 -19   1    1.68    0.50
   1  19  -1    1.73    0.51
  -1  19   1    2.90    0.65
   0 -19  -1   24.50    1.48
   0 -19   1   23.92    1.43
   0  19   1   21.86    1.37
   0  19  -1   21.26    1.34
  -1 -19  -1   -0.34    0.30
   1 -19   1   -0.13    0.29
   1  19   1   -0.22    0.33
  -1  19  -1    0.26    0.37
   2 -19   1    3.95    0.72
  -2 -19  -1    4.48    0.75
  -2  19  -1    3.65    0.71
  -3 -19  -1    6.73    0.88
   3 -19   1    6.38    0.93
  -3  19  -1    7.21    0.98
  -4 -19  -1    0.26    0.36
   4 -19   1   -0.23    0.32
  -4  19  -1    0.29    0.44
   5 -19   1    2.13    0.61
  -5 -19  -1    1.62    0.53
  -5  19  -1    2.86    0.71
  -6 -19  -1    0.79    0.41
   6 -19   1    1.27    0.54
  -6  19  -1   -0.48    0.39
  -7 -19  -1    4.98    0.80
   7 -19   1    4.14    0.84
  -7  19  -1    4.11    0.93
  -8  19  -1   77.06    3.15
  -9  19  -1    3.69    0.90
 -10  19  -1   -0.05    0.53
 -11  19  -1    6.71    1.21
 -12  19  -1   28.68    2.04
 -13  19  -1    0.11    0.60
 -14  19  -1   -0.77    0.55
 -15  19  -1    7.11    1.31
 -16  19  -1   24.60    2.26
 -17  19  -1    5.66    1.23
 -17  20   1   -0.59    0.67
 -16  20   1    1.69    0.86
 -15  20   1    1.15    0.78
 -14  20   1    9.99    1.48
 -13  20   1    2.94    0.99
 -12  20   1    4.13    1.01
 -11  20   1    8.22    1.31
 -10  20   1   11.08    1.40
  -9 -20   1    0.54    0.39
  -9  20   1    0.11    0.50
  -8 -20   1   12.21    1.20
  -8  20   1   12.86    1.47
   7 -20  -1   21.10    1.61
  -7 -20   1   24.02    1.47
  -7  20   1   22.26    1.66
   6 -20  -1   15.77    1.51
  -6 -20   1   14.83    1.20
  -6  20   1   16.69    1.56
  -5 -20   1    0.54    0.42
   5 -20  -1    0.66    0.48
  -5  20   1    0.03    0.43
   4 -20  -1   33.68    1.91
  -4 -20   1   36.96    1.80
  -4  20   1   36.46    1.96
   3 -20  -1    3.49    0.78
  -3 -20   1    3.39    0.68
  -3  20   1    2.97    0.77
   2 -20  -1   -0.78    0.34
  -2 -20   1    0.17    0.36
  -2  20   1   -0.47    0.39
   1 -20  -1    3.06    0.68
  -1 -20   1    3.47    0.71
  -1  20   1    1.92    0.61
   0 -20   1   17.28    1.27
   0 -20  -1   18.38    1.36
   0  20  -1   17.96    1.29
   0  20   1   19.22    1.34
   1 -20   1    0.74    0.46
  -1 -20  -1    0.41    0.42
  -1  20  -1    0.59    0.42
   2 -20   1    0.94    0.49
  -2 -20  -1    1.93    0.56
  -2  20  -1    0.34    0.44
   3 -20   1    0.07    0.44
  -3 -20  -1    0.35    0.39
  -3  20  -1   -0.33    0.42
   4 -20   1   -0.13    0.42
  -4 -20  -1    0.14    0.37
  -4  20  -1    0.01    0.42
   5 -20   1    6.02    0.94
  -5 -20  -1    7.58    0.99
  -5  20  -1    6.91    1.03
  -6 -20  -1   22.14    1.42
   6 -20   1   19.08    1.49
  -6  20  -1   21.45    1.62
   7 -20   1   22.89    1.63
  -7 -20  -1   21.69    1.41
  -7  20  -1   25.59    1.77
  -8  20  -1   -0.35    0.49
  -9  20  -1    3.20    0.88
 -10  20  -1    4.14    0.97
 -11  20  -1   12.33    1.56
 -12  20  -1    0.28    0.65
 -13  20  -1   -0.57    0.58
 -14  20  -1    0.41    0.68
 -15  20  -1   10.78    1.63
 -16  20  -1   10.68    1.59
 -17  20  -1    2.68    1.06
 -16  21   1    9.43    1.52
 -15  21   1   23.03    2.23
 -14  21   1   -0.12    0.73
 -13  21   1    0.20    0.72
 -12  21   1    0.03    0.67
 -11  21   1    0.02    0.54
 -10  21   1    1.65    0.76
  -9 -21   1    5.70    0.85
  -9  21   1    6.25    1.11
  -8 -21   1    7.72    0.99
  -8  21   1    8.98    1.29
  -7 -21   1    1.59    0.54
  -7  21   1    0.70    0.58
   6 -21  -1    0.19    0.46
  -6 -21   1    0.53    0.43
  -6  21   1    0.42    0.52
   5 -21  -1    2.53    0.73
  -5 -21   1    2.13    0.63
  -5  21   1    3.81    0.85
   4 -21  -1    3.90    0.83
  -4 -21   1    2.01    0.64
  -4  21   1    2.24    0.73
   3 -21  -1   88.58    3.28
  -3 -21   1   88.50    3.10
  -3  21   1   89.97    3.28
   2 -21  -1   40.99    2.13
  -2 -21   1   41.50    1.99
  -2  21   1   37.04    2.00
  -1 -21   1    0.57    0.45
   1 -21  -1    0.02    0.38
  -1  21   1    0.50    0.48
   0 -21   1    7.14    1.02
   0 -21  -1    8.43    1.09
   0  21   1   10.12    1.14
   1 -21   1   69.99    2.79
  -1 -21  -1   78.18    2.89
  -1  21  -1   74.68    2.80
   2 -21   1   16.54    1.55
  -2 -21  -1   15.83    1.30
  -2  21  -1   16.40    1.35
  -3 -21  -1   11.41    1.22
   3 -21   1   16.16    1.54
  -3  21  -1   13.58    1.38
  -4 -21  -1    0.73    0.56
   4 -21   1    1.36    0.61
  -4  21  -1    1.56    0.66
  -5 -21  -1   27.34    1.70
   5 -21   1   31.58    1.87
  -5  21  -1   31.00    1.88
  -6 -21  -1    6.28    0.93
   6 -21   1    7.94    1.10
  -6  21  -1    6.56    1.06
  -7 -21  -1    0.46    0.41
   7 -21   1    0.73    0.55
  -7  21  -1    0.51    0.54
  -8  21  -1    3.84    0.92
  -9  21  -1    2.76    0.84
 -10  21  -1    0.71    0.61
 -11  21  -1   -0.26    0.51
 -12  21  -1    1.17    0.78
 -13  21  -1   -0.60    0.58
 -14  21  -1    0.60    0.81
 -15  21  -1    0.24    0.83
 -16  21  -1    9.04    1.54
 -16  22   1    3.31    1.06
 -15  22   1   16.84    1.95
 -14  22   1   15.83    1.87
 -13  22   1   -0.03    0.72
 -12  22   1   -0.89    0.56
 -11  22   1    0.66    0.66
 -10  22   1    0.42    0.64
  -9 -22   1    1.65    0.53
  -9  22   1    1.25    0.72
  -8 -22   1    0.33    0.41
  -8  22   1    0.27    0.57
  -7 -22   1    0.55    0.44
  -7  22   1    1.23    0.66
  -6 -22   1   -0.02    0.38
   6 -22  -1   -0.24    0.42
  -6  22   1   -0.07    0.49
  -5 -22   1    0.23    0.47
   5 -22  -1    0.10    0.44
  -5  22   1    1.05    0.59
   4 -22  -1   38.54    2.15
  -4 -22   1   38.43    1.99
  -4  22   1   42.10    2.21
   3 -22  -1   80.17    3.12
  -3 -22   1   75.47    2.94
  -3  22   1   80.78    3.15
  -2 -22   1   24.78    1.64
   2 -22  -1   24.57    1.75
  -2  22   1   22.93    1.64
   1 -22  -1    1.12    0.54
  -1 -22   1    1.92    0.63
  -1  22   1    1.77    0.63
   0 -22  -1   23.98    1.64
   0 -22   1   23.56    1.59
  -1 -22  -1    3.66    0.79
   1 -22   1    5.04    0.89
  -1  22  -1    2.81    0.73
   2 -22   1   -0.04    0.42
  -2 -22  -1    0.01    0.43
  -2  22  -1   -0.35    0.44
   3 -22   1   18.88    1.57
  -3 -22  -1   20.72    1.51
  -3  22  -1   24.27    1.68
  -4 -22  -1    0.91    0.55
   4 -22   1    0.95    0.62
  -4  22  -1    0.48    0.59
  -5 -22  -1    5.92    1.00
   5 -22   1    8.02    1.18
  -5  22  -1    5.03    0.98
  -6 -22  -1    1.17    0.53
   6 -22   1    0.87    0.59
  -6  22  -1    0.91    0.61
  -7 -22  -1   15.59    1.27
  -7  22  -1   13.25    1.53
  -8  22  -1   -0.15    0.52
  -9  22  -1   -0.60    0.50
 -10  22  -1    1.35    0.73
 -11  22  -1    9.61    1.42
 -12  22  -1   -0.05    0.62
 -13  22  -1    6.32    1.26
 -14  22  -1   -0.55    0.66
 -15  22  -1    7.04    1.43
 -16  22  -1    2.95    1.11
 -15  23   1    9.34    1.57
 -14  23   1   11.35    1.69
 -13  23   1    0.29    0.71
 -12  23   1    0.35    0.72
 -11  23   1    1.18    0.78
 -10  23   1   10.87    1.55
  -9 -23   1   11.89    1.24
  -9  23   1   13.98    1.69
  -8 -23   1    4.02    0.80
  -8  23   1    2.38    0.86
  -7 -23   1    6.35    0.99
  -7  23   1    6.29    1.21
   6 -23  -1    3.52    0.88
  -6 -23   1    2.57    0.72
  -6  23   1    3.54    0.96
   5 -23  -1    0.42    0.52
  -5 -23   1    1.15    0.59
  -5  23   1    1.27    0.65
  -4 -23   1   56.12    2.49
   4 -23  -1   54.47    2.60
  -4  23   1   57.96    2.71
   3 -23  -1   53.06    2.54
  -3 -23   1   51.29    2.40
  -3  23   1   50.09    2.50
   2 -23  -1   32.44    2.00
  -2 -23   1   31.09    1.85
  -2  23   1   28.93    1.86
   1 -23  -1    3.15    0.76
  -1 -23   1    2.23    0.67
   0 -23   1    0.85    0.51
   0 -23  -1    0.67    0.53
   1 -23   1    0.58    0.49
  -1 -23  -1    0.58    0.49
  -2 -23  -1   11.83    1.30
   2 -23   1   11.10    1.32
  -2  23  -1    9.73    1.24
   3 -23   1   18.27    1.73
  -3 -23  -1   19.43    1.53
  -3  23  -1   19.00    1.72
   4 -23   1    9.97    1.30
  -4 -23  -1    9.76    1.22
  -4  23  -1    9.66    1.28
   5 -23   1    3.81    0.87
  -5 -23  -1    3.10    0.78
  -5  23  -1    3.26    0.85
  -6 -23  -1    8.20    1.07
   6 -23   1    8.84    1.27
  -6  23  -1    7.99    1.21
  -7 -23  -1    3.52    0.78
  -7  23  -1    2.45    0.86
  -8  23  -1   11.16    1.51
  -9  23  -1   -0.68    0.52
 -10  23  -1    0.87    0.76
 -11  23  -1   26.12    2.13
 -12  23  -1   45.94    2.77
 -13  23  -1    0.57    0.77
 -14  23  -1    1.54    0.90
 -15  23  -1   -0.11    0.79
 -15  24   1    9.93    1.57
 -14  24   1   -0.39    0.68
 -13  24   1    0.81    0.82
 -12  24   1   -0.17    0.63
 -11  24   1    0.26    0.70
 -10  24   1    2.95    1.00
  -9 -24   1    3.06    0.74
  -9  24   1    1.20    0.84
  -8 -24   1    1.95    0.68
  -8  24   1    1.29    0.89
  -7 -24   1    0.44    0.51
  -7  24   1   -0.31    0.66
  -6 -24   1    0.40    0.48
   6 -24  -1   -0.15    0.53
  -6  24   1   -0.64    0.52
  -5 -24   1    3.64    0.79
   5 -24  -1    4.93    1.03
  -5  24   1    3.20    0.89
   4 -24  -1    0.16    0.56
  -4 -24   1    0.52    0.54
  -4  24   1    1.28    0.69
   3 -24  -1   38.89    2.21
  -3 -24   1   37.25    2.07
  -3  24   1   36.10    2.15
  -2 -24   1   28.14    1.80
   2 -24  -1   24.83    1.80
   1 -24  -1    1.62    0.66
  -1 -24   1    2.13    0.70
   0 -24   1    2.84    0.78
   0 -24  -1    3.37    0.80
   1 -24   1   -0.33    0.41
  -1 -24  -1   -0.03    0.45
   2 -24   1   22.77    1.68
  -2 -24  -1   21.43    1.63
  -3 -24  -1    3.02    0.81
   3 -24   1    2.74    0.80
  -3  24  -1    2.58    0.83
  -4 -24  -1    0.30    0.49
   4 -24   1    0.65    0.62
  -4  24  -1    0.69    0.62
  -5 -24  -1    3.16    0.74
   5 -24   1    2.43    0.80
  -5  24  -1    2.41    0.81
   6 -24   1    3.65    0.95
  -6 -24  -1    4.21    0.83
  -6  24  -1    3.88    0.97
  -7 -24  -1   11.09    1.27
  -7  24  -1   12.60    1.60
  -8  24  -1    1.93    0.89
  -9  24  -1   -0.51    0.64
 -10  24  -1   22.14    2.17
 -11  24  -1   25.66    2.41
 -12  24  -1    3.94    1.16
 -13  24  -1    4.79    1.21
 -14  24  -1    0.44    0.81
 -15  24  -1    0.41    0.81
 -14  25   1    5.70    1.32
 -13  25   1    0.77    0.84
 -12  25   1    1.08    0.90
 -10  25   1    3.72    1.07
  -9 -25   1   13.73    1.40
  -9  25   1   15.75    1.90
  -8 -25   1    0.81    0.54
  -8  25   1   -0.83    0.60
  -7 -25   1    0.79    0.56
  -7  25   1   -0.06    0.67
  -6 -25   1    0.25    0.47
   6 -25  -1    0.73    0.58
  -6  25   1   -0.03    0.65
   5 -25  -1    4.59    1.00
  -5 -25   1    5.33    0.97
  -5  25   1    5.64    1.14
   4 -25  -1   29.74    2.05
  -4 -25   1   33.61    1.99
  -4  25   1   32.07    2.11
   3 -25  -1    0.68    0.62
  -3 -25   1    0.67    0.53
  -3  25   1    0.85    0.66
  -2 -25   1    1.51    0.69
   2 -25  -1    1.69    0.68
   1 -25  -1    1.76    0.72
  -1 -25   1    2.31    0.78
   0 -25  -1    1.19    0.65
   0 -25   1    0.11    0.52
   1 -25   1   38.36    2.22
  -1 -25  -1   42.93    2.32
   2 -25   1   33.70    2.12
  -2 -25  -1   31.91    1.99
  -3 -25  -1    5.95    1.05
   3 -25   1    5.41    1.06
  -4 -25  -1    1.88    0.67
   4 -25   1    2.76    0.86
  -4  25  -1    3.06    0.90
   5 -25   1    5.20    1.06
  -5 -25  -1    5.05    0.94
  -5  25  -1    4.88    1.04
   6 -25   1    4.23    1.01
  -6 -25  -1    5.55    0.98
  -6  25  -1    4.59    1.08
  -7 -25  -1   -0.05    0.40
  -7  25  -1   -0.07    0.61
  -8  25  -1    2.92    0.97
  -9  25  -1    0.60    0.77
 -10  25  -1    0.40    0.79
 -11  25  -1   30.85    2.38
 -12  25  -1   20.42    2.27
 -13  25  -1    0.48    0.77
 -14  25  -1    0.22    0.84
 -14  26   1    0.74    0.91
 -13  26   1    0.92    0.89
 -12  26   1   -0.36    0.73
 -11  26   1    1.76    0.93
 -10  26   1   -0.27    0.65
  -9 -26   1    0.46    0.54
  -9  26   1   -0.90    0.64
  -8 -26   1    1.22    0.59
  -8  26   1    0.51    0.79
  -7 -26   1    1.41    0.62
  -7  26   1    0.55    0.74
  -6 -26   1    2.22    0.76
  -6  26   1    3.12    0.97
  -5 -26   1    2.85    0.80
   5 -26  -1    3.49    0.93
  -5  26   1    4.26    1.04
  -4 -26   1    1.19    0.65
   4 -26  -1    0.79    0.65
  -4  26   1    0.79    0.68
  -3 -26   1    0.66    0.58
   3 -26  -1    0.76    0.61
  -2 -26   1    5.23    1.09
   2 -26  -1    5.09    1.14
   1 -26  -1    1.62    0.77
  -1 -26   1    0.68    0.69
   0 -26   1   10.34    1.39
   0 -26  -1    9.88    1.34
  -1 -26  -1   34.91    2.19
   1 -26   1   31.71    2.11
   2 -26   1   18.31    1.85
  -2 -26  -1   18.24    1.79
   3 -26   1   26.50    1.97
  -3 -26  -1   23.50    1.76
  -4 -26  -1    1.62    0.69
   4 -26   1    0.79    0.68
   5 -26   1    3.84    0.98
  -5 -26  -1    4.39    0.92
  -5  26  -1    5.13    1.10
   6 -26   1    0.70    0.71
  -6 -26  -1    2.55    0.71
  -6  26  -1    0.70    0.72
  -7  26  -1    9.43    1.46
  -8  26  -1    2.27    0.92
  -9  26  -1    3.25    1.05
 -10  26  -1   12.38    1.77
 -11  26  -1    6.33    1.36
 -12  26  -1    4.28    1.27
 -13  26  -1    0.56    0.83
 -14  26  -1   -0.04    0.79
 -13  27   1   -0.41    0.80
 -12  27   1   -0.17    0.89
 -11  27   1    0.66    0.88
 -10  27   1   -0.34    0.76
  -9  27   1    8.66    1.51
  -8 -27   1    1.46    0.67
  -8  27   1    2.85    1.02
  -7 -27   1    0.23    0.53
  -7  27   1   -0.26    0.67
  -6 -27   1    0.52    0.58
  -6  27   1   -0.35    0.57
  -5 -27   1    7.93    1.20
   5 -27  -1    8.82    1.36
  -5  27   1    7.51    1.33
  -4 -27   1    1.65    0.68
   4 -27  -1    0.63    0.64
   3 -27  -1    0.54    0.62
  -3 -27   1   -0.20    0.56
   2 -27  -1   13.72    1.68
  -2 -27   1   11.55    1.52
   1 -27  -1    4.15    1.02
  -1 -27   1    3.19    0.99
   0 -27  -1    2.56    0.84
   0 -27   1    1.79    0.78
   1 -27   1   19.83    1.95
  -1 -27  -1   21.97    2.06
  -2 -27  -1   81.15    3.41
   2 -27   1   79.99    3.53
  -3 -27  -1    3.87    0.94
   3 -27   1    3.56    0.98
  -4 -27  -1    0.69    0.57
   4 -27   1    0.62    0.68
  -5 -27  -1   -0.10    0.48
   5 -27   1   -0.21    0.58
  -6 -27  -1   27.57    1.89
  -6  27  -1   30.08    2.24
  -7  27  -1   22.90    2.25
  -8  27  -1    4.45    1.17
  -9  27  -1    6.06    1.34
 -10  27  -1    0.16    0.73
 -11  27  -1    3.32    1.15
 -12  27  -1   -0.13    0.79
 -13  27  -1    6.07    1.44
 -13  28   1    0.91    0.96
 -12  28   1    0.13    0.94
 -11  28   1    2.81    1.18
 -10  28   1    3.01    1.12
  -9  28   1    1.39    0.93
  -8 -28   1    4.58    0.98
  -8  28   1    4.85    1.23
  -7 -28   1   -0.47    0.45
  -7  28   1    0.94    0.87
  -6 -28   1    0.51    0.65
  -6  28   1    0.59    0.77
  -5 -28   1    3.02    0.94
   5 -28  -1    2.86    0.99
  -4 -28   1    6.20    1.13
   4 -28  -1    7.16    1.31
   3 -28  -1    1.60    0.78
  -3 -28   1    4.73    1.01
  -2 -28   1    3.23    0.96
   2 -28  -1    3.91    1.06
  -1 -28   1    0.16    0.65
   1 -28  -1    0.73    0.69
   0 -28  -1    0.54    0.64
   0 -28   1    0.34    0.61
  -1 -28  -1   19.54    1.92
   1 -28   1   24.06    1.97
   2 -28   1    6.57    1.27
  -2 -28  -1    6.60    1.20
   3 -28   1   16.13    1.87
  -3 -28  -1   13.86    1.59
  -4 -28  -1    2.64    0.81
   4 -28   1    2.99    0.99
  -5 -28  -1    3.23    0.89
   5 -28   1    3.10    1.03
  -6 -28  -1   33.51    2.14
  -7  28  -1   15.12    1.89
  -8  28  -1    3.90    1.16
  -9  28  -1    0.08    0.85
 -10  28  -1   -0.36    0.78
 -11  28  -1    0.59    0.90
 -12  28  -1    2.50    1.14
 -12  29   1   -0.25    0.89
 -11  29   1    7.16    1.52
 -10  29   1    0.84    0.90
  -9  29   1   22.00    2.31
  -8 -29   1    0.72    0.62
  -8  29   1    1.74    0.97
  -7 -29   1    2.31    0.82
  -6 -29   1    0.29    0.66
  -5 -29   1    9.60    1.37
   4 -29  -1   -0.36    0.60
  -4 -29   1   -0.09    0.55
  -3 -29   1   -0.03    0.53
   3 -29  -1   -1.19    0.46
   2 -29  -1    0.24    0.58
  -2 -29   1   -0.60    0.48
   1 -29  -1    2.00    0.84
  -1 -29   1    2.80    0.94
   0 -29  -1    3.47    0.93
   0 -29   1    2.55    0.89
   1 -29   1    2.24    0.90
  -1 -29  -1    2.17    0.84
  -2 -29  -1    2.10    0.81
   2 -29   1    1.87    0.82
  -3 -29  -1    2.12    0.79
   3 -29   1   -0.02    0.61
   4 -29   1    0.42    0.73
  -4 -29  -1    0.66    0.67
  -5 -29  -1   13.42    1.59
   5 -29   1   13.54    1.82
  -8  29  -1    1.69    1.04
  -9  29  -1   -0.75    0.78
 -10  29  -1    0.73    0.93
 -11  29  -1    1.39    1.00
 -12  29  -1   -1.34    0.77
 -11  30   1    0.63    0.98
 -10  30   1   -0.43    0.85
  -9  30   1    0.74    0.94
  -7 -30   1   -0.70    0.49
  -6 -30   1    0.70    0.70
  -5 -30   1    0.21    0.66
  -4 -30   1    2.23    0.84
   4 -30  -1    1.71    0.92
  -3 -30   1    2.14    0.82
   3 -30  -1    0.48    0.69
  -2 -30   1    0.24    0.61
   2 -30  -1    1.09    0.82
  -1 -30   1    1.20    0.77
   1 -30  -1    0.96    0.77
   0 -30  -1    0.11    0.60
   0 -30   1    0.16    0.66
  -1 -30  -1    1.21    0.77
   1 -30   1    0.56    0.67
   2 -30   1    2.81    1.00
  -2 -30  -1    3.12    0.95
  -3 -30  -1    0.18    0.58
   3 -30   1   -0.06    0.64
   4 -30   1   -0.96    0.55
  -4 -30  -1    0.17    0.62
   5 -30   1    0.82    0.79
  -5 -30  -1    1.68    0.77
 -10  30  -1    4.37    1.27
 -11  30  -1   -0.33    0.87
  -7 -31   1    2.42    0.85
  -6 -31   1    0.37    0.70
  -5 -31   1    0.59    0.70
   4 -31  -1    1.31    0.84
  -4 -31   1    2.59    0.85
  -3 -31   1    0.18    0.66
   3 -31  -1   -0.17    0.59
   2 -31  -1    6.29    1.28
  -2 -31   1    6.63    1.33
  -1 -31   1    0.59    0.78
   1 -31  -1    0.89    0.77
   0 -31   1    1.19    0.84
   0 -31  -1    1.05    0.85
   1 -31   1    7.78    1.39
  -1 -31  -1    7.60    1.30
  -2 -31  -1   32.69    2.32
   2 -31   1   39.22    2.63
  -3 -31  -1    3.36    1.01
   3 -31   1    5.90    1.29
  -4 -31  -1    0.07    0.59
   4 -31   1    0.17    0.74
  -6 -32   1    3.55    0.96
  -5 -32   1    1.53    0.78
  -4 -32   1    2.37    0.87
   4 -32  -1    1.59    0.88
   3 -32  -1    3.28    1.08
  -3 -32   1    4.12    1.12
   2 -32  -1   -0.40    0.69
  -2 -32   1   -0.43    0.67
  -1 -32   1   -0.43    0.73
   1 -32  -1   -0.92    0.58
   0 -32  -1    6.21    1.30
   0 -32   1    4.98    1.20
  -1 -32  -1   10.93    1.64
   1 -32   1   12.78    1.77
   2 -32   1   14.75    1.93
  -2 -32  -1   15.00    1.89
  -3 -32  -1   11.37    1.63
   3 -32   1   12.45    1.79
   4 -32   1    0.21    0.78
  -6 -33   1    0.65    0.71
  -5 -33   1    6.75    1.28
  -4 -33   1    3.63    1.04
  -3 -33   1    1.26    0.78
   3 -33  -1    0.88    0.88
  -2 -33   1    0.60    0.80
   2 -33  -1   -0.41    0.69
  -1 -33   1    1.06    0.86
   1 -33  -1   -0.09    0.76
   0 -33   1    0.93    0.78
   0 -33  -1   -0.19    0.64
   1 -33   1    6.18    1.33
  -1 -33  -1    8.13    1.49
  -2 -33  -1   16.62    1.95
   2 -33   1   15.21    1.98
  -3 -33  -1    8.10    1.39
   3 -33   1    8.42    1.53
   4 -33   1    0.03    0.74
  -5 -34   1    0.82    0.79
  -4 -34   1    2.78    1.01
  -3 -34   1    2.07    0.94
   3 -34  -1    0.74    0.82
   2 -34  -1    3.32    1.15
  -2 -34   1    3.51    1.12
   1 -34  -1   -0.44    0.65
  -1 -34   1   -0.45    0.65
   0 -34  -1    0.62    0.77
   0 -34   1    1.08    0.80
   1 -34   1    3.01    1.06
  -1 -34  -1    2.59    1.01
   2 -34   1    9.19    1.62
  -2 -34  -1    7.23    1.39
   3 -34   1    1.18    0.89
   3 -35  -1    4.94    1.31
  -3 -35   1    6.31    1.32
  -2 -35   1    3.20    1.12
   2 -35  -1    3.43    1.13
  -1 -35   1    0.43    0.78
   1 -35  -1    0.83    0.88
   0 -35   1    2.61    0.97
   0 -35  -1    0.78    0.83
   1 -35   1   -0.22    0.65
   2 -35   1   -0.29    0.71
   3 -35   1    2.10    1.09
 -17   0   2   -0.52    0.30
 -16   0   2   -0.17    0.29
 -15   0   2   -0.32    0.23
 -14   0   2   38.42    1.40
 -13   0   2   -0.33    0.20
 -12   0   2    0.29    0.22
 -11   0   2   -0.31    0.19
 -10   0   2   85.04    2.11
  -9   0   2   -0.37    0.14
  -9   0   2   -0.11    0.15
  -8   0   2    0.35    0.15
  -8   0   2    0.39    0.16
  -7   0   2    0.18    0.12
  -7   0   2    0.14    0.12
  -6   0   2   13.15    0.49
  -6   0   2   13.98    0.49
  -5   0   2   -0.55    0.09
  -5   0   2   -0.64    0.09
  -4   0   2   34.33    0.82
  -3   0   2    0.13    0.09
  -2   0   2   90.99    1.89
  -1   0   2    0.07    0.09
   0   0   2  335.20    6.51
   1   0   2   -0.03    0.08
  -2   0  -2   82.75    1.86
   2   0   2   83.17    1.83
  -3   0  -2   -0.06    0.14
  -4   0  -2  177.79    3.74
  -5   0  -2    0.19    0.15
  -6   0  -2    8.76    0.52
  -7   0  -2    0.25    0.20
  -8   0  -2  353.51    7.30
  -9   0  -2    0.07    0.26
 -10   0  -2   29.87    1.19
 -11   0  -2   -0.03    0.23
 -12   0  -2   19.24    1.03
 -13   0  -2    0.42    0.36
 -14   0  -2   34.75    1.50
 -15   0  -2   -0.17    0.30
 -16   0  -2    0.58    0.37
 -17   0  -2   -0.20    0.32
 -18   0  -2   -0.18    0.36
 -19   0  -2    0.61    0.45
 -17   1   2   38.04    1.54
 -16  -1   2   -0.21    0.27
 -16   1   2   -0.35    0.26
 -15  -1   2    0.12    0.25
 -15   1   2    0.02    0.28
 -14  -1   2    7.99    0.66
 -14   1   2    8.19    0.75
 -13  -1   2    8.50    0.61
 -13   1   2   10.85    0.73
 -12  -1   2    1.49    0.28
 -12   1   2    1.43    0.32
 -11  -1   2    6.72    0.52
 -11   1   2    6.89    0.60
 -10  -1   2    6.29    0.46
 -10  -1   2    5.57    0.46
 -10   1   2    5.93    0.54
  -9  -1   2   36.64    1.03
  -9  -1   2   37.22    1.03
  -9   1   2   37.34    1.15
  -9   1   2   37.39    1.18
  -8  -1   2    6.41    0.35
  -8  -1   2    6.73    0.37
  -8   1   2    7.06    0.44
  -8   1   2    7.91    0.47
  -7  -1   2    0.77    0.14
  -7  -1   2    1.28    0.16
  -7   1   2    0.68    0.18
  -7   1   2    0.85    0.18
  -6  -1   2    1.65    0.15
  -6   1   2    1.55    0.22
  -6   1   2    1.67    0.22
  -5   1   2   14.89    0.55
  -5   1   2   13.62    0.52
  -4   1   2    0.76    0.15
  -3  -1   2  146.66    2.88
  -3  -1   2  150.39    2.89
  -3   1   2  147.63    3.01
  -2  -1   2   32.73    0.78
  -2   1   2   32.11    0.83
  -1  -1   2   73.63    1.60
  -1   1   2   76.05    1.65
   0  -1   2    0.40    0.11
   0   1   2    0.64    0.14
   0   1  -2    0.32    0.10
   1  -1   2    2.60    0.24
  -1   1  -2    2.65    0.23
   1   1   2    2.13    0.22
   2  -1   2    5.49    0.35
  -2   1  -2    5.66    0.36
   2   1   2    5.32    0.33
   3  -1   2   28.68    0.83
  -3   1  -2   28.66    0.88
  -4   1  -2   18.52    0.71
  -5  -1  -2    3.64    0.35
  -5   1  -2    3.65    0.38
  -6  -1  -2    1.64    0.26
  -6   1  -2    1.31    0.25
  -7  -1  -2  178.85    3.93
  -7   1  -2  181.18    4.01
  -8  -1  -2  109.02    2.64
  -8   1  -2  106.26    2.70
  -9  -1  -2  150.14    3.50
  -9   1  -2  149.84    3.58
 -10  -1  -2    0.29    0.23
 -10   1  -2    0.77    0.29
 -11  -1  -2    0.25    0.24
 -11   1  -2    0.78    0.31
 -12  -1  -2   47.54    1.64
 -12   1  -2   45.57    1.69
 -13  -1  -2   53.98    1.86
 -13   1  -2   54.35    1.94
 -14  -1  -2    3.78    0.58
 -14   1  -2    3.53    0.60
 -15  -1  -2    1.57    0.46
 -15   1  -2    1.75    0.49
 -16  -1  -2    0.95    0.39
 -16   1  -2    1.14    0.46
 -17  -1  -2    2.08    0.54
 -17   1  -2    1.77    0.54
 -18  -1  -2    0.94    0.45
 -18   1  -2    0.72    0.46
 -19   1  -2   14.99    1.15
 -18   2   2   36.08    1.59
 -17   2   2    0.97    0.44
 -16   2   2    0.42    0.36
 -15   2   2    0.45    0.36
 -14  -2   2    0.31    0.27
 -14   2   2    0.60    0.36
 -13  -2   2   29.62    1.02
 -13   2   2   27.70    1.21
 -12  -2   2   10.05    0.55
 -12   2   2    9.73    0.70
 -11  -2   2   11.97    0.58
 -11   2   2   12.80    0.77
 -10  -2   2   19.70    0.69
 -10  -2   2   17.58    0.67
 -10   2   2   18.30    0.90
  -9   2   2   50.21    1.50
  -9   2   2   50.34    1.48
  -8   2   2   25.19    0.91
  -8   2   2   24.33    0.90
  -7   2   2  240.11    4.99
  -6   2   2    3.07    0.32
  -5   2   2   97.52    2.20
  -4   2   2    0.56    0.16
  -3   2   2  408.03    7.95
  -2  -2   2   24.57    0.63
  -2   2   2   25.38    0.75
  -1  -2   2    2.72    0.22
  -1   2   2    2.30    0.24
   0  -2   2   11.86    0.44
   0   2   2   12.35    0.49
   0   2  -2   11.92    0.44
   1  -2   2    5.90    0.35
   1   2   2    6.37    0.37
  -1   2  -2    6.12    0.35
   2  -2   2  157.31    3.31
   2   2   2  161.37    3.27
  -2   2  -2  157.85    3.34
   3  -2   2   48.05    1.24
  -3   2  -2   47.88    1.29
   4  -2   2    4.95    0.38
  -4   2  -2    5.63    0.42
  -5   2  -2   17.02    0.75
  -6   2  -2    0.01    0.16
  -7  -2  -2   82.46    2.08
  -7   2  -2   83.89    2.20
  -8  -2  -2  226.06    4.80
  -8  -2  -2  224.53    4.82
  -8   2  -2  222.26    4.96
  -9  -2  -2  152.43    3.54
  -9   2  -2  156.08    3.71
 -10  -2  -2    4.14    0.49
 -10   2  -2    3.37    0.48
 -11  -2  -2    7.07    0.65
 -11   2  -2    7.56    0.73
 -12  -2  -2    8.40    0.74
 -12   2  -2    8.13    0.81
 -13  -2  -2  122.02    3.20
 -13   2  -2  126.50    3.43
 -14  -2  -2   34.12    1.43
 -14   2  -2   37.01    1.61
 -15  -2  -2    1.41    0.45
 -15   2  -2    1.51    0.51
 -16  -2  -2    0.14    0.32
 -16   2  -2    0.31    0.39
 -17  -2  -2   10.66    0.94
 -17   2  -2    9.37    1.01
 -18  -2  -2    1.67    0.48
 -18   2  -2    0.67    0.48
 -19   2  -2    3.47    0.72
 -18   3   2    3.01    0.64
 -17   3   2    0.31    0.39
 -16   3   2   -0.13    0.32
 -15   3   2   12.18    1.03
 -14   3   2   39.89    1.62
 -13   3   2   61.26    2.03
 -12   3   2    5.93    0.64
 -11   3   2    0.00    0.24
 -10   3   2   37.14    1.34
  -9   3   2   18.80    0.88
  -8   3   2    6.61    0.51
  -7   3   2   65.84    1.76
  -6   3   2    2.91    0.35
  -5   3   2   -0.01    0.15
  -4   3   2    0.93    0.20
  -3  -3   2    5.60    0.24
  -3  -3   2    6.21    0.25
  -3   3   2    5.48    0.38
  -2  -3   2  207.02    4.04
  -2   3   2  203.26    4.20
  -1  -3   2   12.73    0.47
  -1   3   2   14.17    0.56
   0  -3   2    2.46    0.26
   0   3  -2    2.15    0.24
   0   3   2    1.99    0.26
   1  -3   2    0.72    0.18
   1   3   2    0.39    0.16
  -1   3  -2    0.59    0.17
   2  -3   2   20.35    0.72
  -2   3  -2   22.18    0.77
   2   3   2   21.56    0.71
   3  -3   2   29.97    0.94
  -3   3  -2   30.48    0.98
   4  -3   2   39.56    1.15
  -4   3  -2   39.53    1.21
   5  -3   2   96.61    2.29
  -5   3  -2   98.41    2.41
  -6   3  -2    1.89    0.32
  -7  -3  -2   52.48    1.47
  -7   3  -2   53.52    1.63
  -8  -3  -2  281.97    6.06
  -8  -3  -2  298.94    6.06
  -8   3  -2  295.22    6.30
  -9  -3  -2    7.07    0.59
  -9   3  -2    5.96    0.65
 -10  -3  -2    7.76    0.57
 -10   3  -2    5.32    0.63
 -11  -3  -2   -0.08    0.20
 -11   3  -2    0.05    0.27
 -12  -3  -2  117.03    3.02
 -12   3  -2  119.90    3.29
 -13  -3  -2   43.61    1.60
 -13   3  -2   44.53    1.81
 -14  -3  -2    6.04    0.67
 -14   3  -2    6.13    0.80
 -15  -3  -2   11.48    0.84
 -15   3  -2   13.11    1.04
 -16  -3  -2    3.07    0.52
 -16   3  -2    2.47    0.61
 -17  -3  -2    1.34    0.44
 -17   3  -2    1.36    0.51
 -18   3  -2    0.14    0.44
 -19   3  -2    0.79    0.51
 -20   3  -2   -0.66    0.45
 -19   4   2    5.19    0.80
 -18   4   2    5.85    0.83
 -17   4   2    0.81    0.47
 -16   4   2    0.86    0.44
 -15   4   2   -0.73    0.33
 -14   4   2  112.89    3.20
 -13   4   2   83.96    2.57
 -12   4   2   14.59    0.91
 -11   4   2    0.27    0.26
 -10   4   2   -0.24    0.22
  -9   4   2   48.22    1.57
  -8   4   2   41.31    1.37
  -7   4   2   35.90    1.22
  -6   4   2    5.44    0.48
  -5   4   2   85.23    2.12
   4  -4  -2   14.33    0.63
  -4   4   2   16.47    0.68
   3  -4  -2   92.37    2.18
  -3  -4   2   92.28    1.96
  -3  -4   2   97.58    1.97
  -3   4   2   97.21    2.23
  -2  -4   2   31.85    0.83
   2  -4  -2   31.21    0.95
  -2   4   2   31.52    0.98
  -1  -4   2   30.14    0.85
   1   4  -2   31.13    0.84
  -1   4   2   30.45    0.94
   0  -4   2   26.94    0.83
   0   4  -2   27.31    0.83
   0   4   2   27.52    0.89
   1  -4   2   59.00    1.49
   1   4   2   59.23    1.51
  -1   4  -2   60.77    1.50
   2  -4   2  102.30    2.36
  -2   4  -2  106.16    2.40
   2   4   2  101.64    2.32
   3  -4   2  231.06    4.86
  -3   4  -2  237.28    4.92
   4  -4   2  516.25   10.23
  -4   4  -2  521.31   10.32
   5  -4   2    2.81    0.35
  -5   4  -2    2.52    0.37
   6  -4   2    9.48    0.58
  -6   4  -2    9.22    0.63
  -7  -4  -2    0.10    0.15
  -7   4  -2   -0.12    0.17
  -8  -4  -2    2.27    0.35
  -8   4  -2    2.78    0.44
  -9  -4  -2  103.64    2.56
  -9   4  -2  102.77    2.80
 -10  -4  -2    2.23    0.36
 -10   4  -2    1.55    0.41
 -11  -4  -2    0.16    0.22
 -11   4  -2    0.20    0.29
 -12  -4  -2    8.97    0.72
 -12   4  -2    9.78    0.92
 -13  -4  -2   37.51    1.43
 -13   4  -2   39.42    1.69
 -14  -4  -2   44.21    1.57
 -14   4  -2   41.71    1.82
 -15  -4  -2    1.10    0.38
 -15   4  -2    1.00    0.49
 -16  -4  -2    0.28    0.34
 -16   4  -2   -0.06    0.41
 -17  -4  -2    0.19    0.34
 -17   4  -2    0.16    0.45
 -18   4  -2    0.89    0.50
 -19   4  -2    6.85    0.99
 -20   4  -2    0.68    0.57
 -19   5   2    0.11    0.48
 -18   5   2    1.62    0.61
 -17   5   2    5.61    0.84
 -16   5   2   -0.32    0.36
 -15   5   2   23.38    1.40
 -14   5   2    8.80    0.95
 -13   5   2   94.52    2.84
 -12   5   2   43.33    1.69
 -11   5   2    4.84    0.61
 -10   5   2    0.71    0.31
  -9   5   2    0.44    0.26
  -8   5   2    1.04    0.30
  -7   5   2    1.21    0.29
  -6   5   2   21.71    0.91
   5  -5  -2    5.85    0.45
  -5   5   2    5.29    0.50
  -4  -5   2    0.24    0.10
  -4  -5   2    0.08    0.10
   4  -5  -2    0.21    0.17
  -4   5   2    0.16    0.17
   3  -5  -2  130.71    2.92
  -3  -5   2  126.15    2.68
  -3   5   2  131.76    2.95
  -2  -5   2    8.15    0.40
   2  -5  -2    7.30    0.47
  -2   5   2    7.54    0.48
  -1  -5   2   34.34    0.97
   1  -5  -2   35.78    1.06
   1   5  -2   34.44    0.96
  -1   5   2   33.85    1.06
   0  -5   2   24.49    0.78
   0  -5  -2   20.35    0.77
   0   5   2   22.18    0.81
   0   5  -2   22.05    0.76
   1  -5   2   39.43    1.14
  -1  -5  -2   39.92    1.13
   1   5   2   39.39    1.17
   2  -5   2  382.94    7.83
   2   5   2  386.07    7.80
  -2   5  -2  407.41    7.90
   3  -5   2  267.15    5.55
  -3   5  -2  267.89    5.60
   4  -5   2   84.87    2.14
  -4   5  -2   84.76    2.20
   5  -5   2  159.58    3.58
  -5   5  -2  157.77    3.67
   6  -5   2   36.69    1.24
  -6   5  -2   37.92    1.34
  -7  -5  -2    2.10    0.31
   7  -5   2    1.54    0.31
  -7   5  -2    1.62    0.35
  -8  -5  -2    3.32    0.40
  -8   5  -2    2.85    0.46
  -9   5  -2    1.48    0.42
 -10  -5  -2    0.46    0.24
 -10   5  -2    0.22    0.32
 -11  -5  -2    0.12    0.20
 -11   5  -2   -0.05    0.27
 -12  -5  -2    2.72    0.46
 -12   5  -2    3.54    0.62
 -13  -5  -2   11.07    0.79
 -13   5  -2   10.78    1.02
 -14  -5  -2   -0.49    0.26
 -14   5  -2    0.18    0.39
 -15  -5  -2   10.45    0.76
 -15   5  -2   10.16    1.08
 -16  -5  -2    0.24    0.29
 -16   5  -2   -0.29    0.38
 -17  -5  -2   22.84    1.12
 -17   5  -2   26.34    1.57
 -18   5  -2   23.23    1.53
 -19   5  -2    3.38    0.80
 -20   5  -2   -0.74    0.46
 -20   6   2    5.02    0.89
 -19   6   2    4.04    0.83
 -18   6   2   10.73    1.14
 -17   6   2    2.04    0.57
 -16   6   2   -0.70    0.37
 -15   6   2    3.14    0.72
 -14   6   2   62.35    2.30
 -13   6   2   36.10    1.63
 -12   6   2    2.45    0.54
 -11   6   2   -0.09    0.29
 -10   6   2    2.36    0.46
  -9   6   2    9.80    0.75
  -8   6   2   70.33    2.08
  -7   6   2    5.42    0.57
   6  -6  -2    1.70    0.30
  -6   6   2    1.61    0.33
   5  -6  -2    5.96    0.52
  -5  -6   2    5.11    0.30
  -5  -6   2    6.31    0.31
  -5   6   2    5.40    0.51
  -4  -6   2   26.75    0.77
   4  -6  -2   27.00    0.99
  -4  -6   2   27.11    0.76
  -4   6   2   26.59    1.02
  -3  -6   2   18.48    0.62
   3  -6  -2   17.25    0.77
  -3   6   2   16.42    0.76
   2  -6  -2   90.00    2.18
  -2  -6   2   86.78    2.02
  -2   6   2   87.20    2.20
  -1  -6   2    8.97    0.48
   1  -6  -2    8.16    0.54
  -1   6   2    9.68    0.56
   1   6  -2    8.75    0.47
   0  -6   2   38.64    1.15
   0  -6  -2   38.00    1.17
   0   6   2   41.33    1.22
   0   6  -2   38.81    1.15
  -1  -6  -2   23.23    0.86
   1  -6   2   25.62    0.90
   1   6   2   25.04    0.90
  -1   6  -2   25.54    0.90
  -2  -6  -2   28.34    0.93
   2  -6   2   26.34    0.97
   2   6   2   26.01    0.94
  -2   6  -2   26.88    0.98
   3  -6   2  558.77   11.07
  -3   6  -2  557.75   11.12
   4  -6   2  498.49   10.13
  -4   6  -2  515.34   10.25
   5  -6   2   23.72    0.98
  -5   6  -2   26.35    1.08
  -6   6  -2    3.75    0.51
  -7  -6  -2   19.59    0.84
   7  -6   2   19.67    0.91
  -7   6  -2   19.89    1.00
  -8  -6  -2   11.40    0.68
   8  -6   2   11.81    0.73
  -8   6  -2   10.41    0.79
  -9   6  -2   11.10    0.97
 -10   6  -2   20.37    1.19
 -11  -6  -2    0.16    0.22
 -11   6  -2   -0.27    0.26
 -12  -6  -2    6.21    0.62
 -12   6  -2    6.29    0.79
 -13  -6  -2    4.78    0.58
 -13   6  -2    5.68    0.79
 -14  -6  -2    0.41    0.32
 -14   6  -2    0.58    0.44
 -15  -6  -2    0.07    0.28
 -15   6  -2    0.51    0.43
 -16  -6  -2    2.48    0.44
 -16   6  -2    1.62    0.60
 -17   6  -2   17.97    1.39
 -18   6  -2   10.62    1.21
 -19   6  -2   11.34    1.28
 -20   6  -2    0.03    0.54
 -20   7   2    0.92    0.62
 -19   7   2    1.14    0.66
 -18   7   2    0.14    0.48
 -17   7   2    0.30    0.46
 -16   7   2    0.12    0.41
 -15   7   2    7.48    0.96
 -14   7   2    0.70    0.49
 -13   7   2    1.84    0.51
 -12   7   2   29.74    1.46
 -11   7   2   11.44    0.91
 -10   7   2   58.95    2.05
  -9   7   2   74.99    2.33
  -8   7   2    6.26    0.69
   7  -7  -2   39.51    1.35
  -7   7   2   43.80    1.54
  -6  -7   2    2.28    0.23
  -6  -7   2    2.53    0.24
   6  -7  -2    3.01    0.40
  -6   7   2    2.53    0.42
  -5  -7   2   29.86    0.84
   5  -7  -2   28.38    1.09
  -5  -7   2   27.58    0.83
  -5   7   2   29.09    1.15
   4  -7  -2    6.44    0.55
  -4  -7   2    5.55    0.36
  -4  -7   2    5.77    0.37
  -4   7   2    4.90    0.51
  -3  -7   2    3.79    0.34
   3  -7  -2    3.64    0.44
  -3   7   2    3.31    0.42
  -2  -7   2   13.86    0.62
   2  -7  -2   13.64    0.71
  -2   7   2   14.76    0.74
   1  -7  -2   12.66    0.68
  -1  -7   2   12.19    0.59
  -1   7   2   12.52    0.67
   1   7  -2   11.88    0.58
   0  -7  -2   49.54    1.43
   0  -7   2   46.94    1.37
   0   7  -2   47.68    1.38
   0   7   2   49.46    1.45
  -1  -7  -2   18.54    0.76
   1  -7   2   16.73    0.76
  -1   7  -2   16.44    0.76
   1   7   2   16.41    0.75
  -2  -7  -2  194.97    4.16
   2  -7   2  185.04    4.21
  -2   7  -2  195.87    4.27
   2   7   2  195.33    4.19
   3  -7   2  157.65    3.62
  -3  -7  -2  158.33    3.50
  -3   7  -2  164.14    3.69
   3   7   2  154.66    3.49
   4  -7   2  155.19    3.64
  -4   7  -2  160.19    3.73
   5  -7   2   69.33    1.97
  -5   7  -2   66.95    2.02
   6  -7   2    0.04    0.20
  -6   7  -2    0.37    0.26
  -7  -7  -2   22.10    0.93
   7  -7   2   20.71    0.97
  -7   7  -2   19.68    1.04
   8  -7   2   41.87    1.49
  -8   7  -2   42.71    1.65
  -9   7  -2   21.52    1.22
 -10   7  -2   -0.47    0.30
 -11  -7  -2    0.40    0.23
 -11   7  -2    0.25    0.34
 -12  -7  -2   25.40    1.10
 -12   7  -2   25.56    1.41
 -13  -7  -2   11.26    0.77
 -13   7  -2    9.60    1.08
 -14  -7  -2    0.20    0.27
 -14   7  -2    0.48    0.41
 -15  -7  -2    2.05    0.42
 -15   7  -2    1.47    0.55
 -16  -7  -2    3.97    0.53
 -16   7  -2    4.41    0.83
 -17   7  -2   24.22    1.65
 -18   7  -2   23.02    1.62
 -19   7  -2    0.75    0.61
 -20   7  -2   -0.60    0.53
 -20   8   2    1.90    0.75
 -19   8   2   -0.02    0.60
 -18   8   2    3.52    0.81
 -17   8   2    0.54    0.50
 -16   8   2    0.31    0.45
 -15   8   2    0.65    0.50
 -14   8   2    4.32    0.74
 -13   8   2    0.34    0.39
 -12   8   2   21.16    1.27
 -11   8   2    1.16    0.41
 -10   8   2   20.55    1.21
  -9   8   2  153.79    3.99
  -8  -8   2  290.51    5.77
  -8   8   2  291.28    6.54
   7  -8  -2    3.28    0.45
  -7  -8   2    3.10    0.29
  -7  -8   2    2.93    0.27
  -7   8   2    1.97    0.42
  -6  -8   2    3.12    0.30
  -6  -8   2    2.74    0.29
   6  -8  -2    2.40    0.40
  -6   8   2    2.48    0.43
   5  -8  -2   68.59    1.98
  -5  -8   2   67.98    1.67
  -5  -8   2   71.03    1.68
  -5   8   2   66.52    2.03
  -4  -8   2   73.44    1.78
  -4   8   2   70.87    2.08
  -3  -8   2    3.68    0.36
   3  -8  -2    3.88    0.47
  -3   8   2    3.61    0.45
  -2  -8   2  180.91    3.96
   2  -8  -2  184.52    4.14
   2   8  -2  187.63    3.92
  -2   8   2  183.04    4.17
   1  -8  -2  278.54    6.01
  -1  -8   2  288.58    5.92
   1   8  -2  282.50    5.89
  -1   8   2  291.20    6.06
   0  -8   2    5.30    0.48
   0  -8  -2    4.70    0.48
   0   8  -2    6.00    0.48
   0   8   2    6.47    0.58
   1  -8   2    2.49    0.37
  -1  -8  -2    2.85    0.38
   1   8   2    2.46    0.37
  -1   8  -2    2.01    0.34
  -2  -8  -2   44.46    1.34
   2  -8   2   39.05    1.34
   2   8   2   40.42    1.33
  -2   8  -2   41.95    1.40
  -3  -8  -2   24.62    0.93
   3  -8   2   23.54    0.99
   3   8   2   21.52    0.89
  -3   8  -2   22.50    1.00
   4  -8   2   76.98    2.13
  -4  -8  -2   75.44    1.97
  -4   8  -2   74.07    2.16
   5  -8   2    9.15    0.68
  -5   8  -2   10.34    0.74
   6  -8   2   23.14    1.04
  -6   8  -2   19.69    1.04
   7  -8   2    9.32    0.70
  -7   8  -2    6.76    0.70
   8  -8   2   -0.09    0.22
  -8   8  -2   -0.22    0.26
  -9   8  -2   17.70    1.16
 -10   8  -2   40.77    1.78
 -11   8  -2    0.42    0.36
 -12  -8  -2    5.77    0.61
 -12   8  -2    3.93    0.71
 -13  -8  -2   15.85    0.88
 -13   8  -2   12.42    1.20
 -14  -8  -2   29.35    1.21
 -14   8  -2   28.03    1.63
 -15  -8  -2    7.90    0.70
 -15   8  -2    8.24    1.06
 -16  -8  -2   -0.02    0.28
 -16   8  -2   -0.15    0.44
 -17   8  -2   16.58    1.57
 -18   8  -2   23.92    1.70
 -19   8  -2    0.03    0.54
 -20   8  -2    0.40    0.62
 -20   9   2    3.47    0.88
 -19   9   2    6.51    1.07
 -18   9   2    0.42    0.54
 -17   9   2   -0.21    0.44
 -16   9   2    1.11    0.54
 -15   9   2    6.67    0.97
 -14   9   2    0.41    0.42
 -13   9   2    5.28    0.82
 -12   9   2    1.54    0.50
 -11   9   2    3.29    0.61
 -10   9   2   62.79    2.23
  -9  -9   2  133.43    2.86
  -9   9   2  130.72    3.62
  -8  -9   2   65.99    1.63
  -8  -9   2   64.08    1.62
  -8   9   2   66.57    2.22
   7  -9  -2   43.87    1.57
  -7  -9   2   44.11    1.24
  -7  -9   2   45.52    1.24
  -7   9   2   46.56    1.72
  -6  -9   2   10.06    0.54
   6  -9  -2    9.41    0.73
  -6  -9   2   10.49    0.53
  -6   9   2   10.72    0.78
   5  -9  -2    7.18    0.66
  -5  -9   2    6.86    0.47
  -5  -9   2    7.11    0.48
  -5   9   2    6.89    0.70
   4  -9  -2    1.48    0.34
  -4  -9   2    1.57    0.26
  -4   9   2    0.89    0.31
  -3  -9   2    0.56    0.20
   3  -9  -2    0.68    0.26
  -3   9   2    0.53    0.25
   2  -9  -2  249.74    5.43
  -2  -9   2  240.89    5.23
  -2   9   2  246.59    5.45
   2   9  -2  252.90    5.19
  -1  -9   2  420.30    8.57
   1  -9  -2  417.71    8.68
  -1   9   2  417.53    8.70
   1   9  -2  432.95    8.54
   0  -9   2  163.38    3.78
   0  -9  -2  167.68    3.84
   0   9  -2  168.67    3.79
   0   9   2  165.39    3.84
   1  -9   2    0.14    0.19
  -1  -9  -2   -0.03    0.15
  -1   9  -2   -0.09    0.16
   1   9   2    0.34    0.21
   2  -9   2   47.32    1.52
  -2  -9  -2   44.20    1.43
  -2   9  -2   45.67    1.53
   2   9   2   45.33    1.45
  -3  -9  -2   13.24    0.71
   3  -9   2   13.19    0.77
  -3   9  -2   12.16    0.77
   3   9   2   12.35    0.70
  -4  -9  -2    0.09    0.16
   4  -9   2    0.37    0.23
  -4   9  -2   -0.02    0.20
   5  -9   2    5.51    0.60
  -5   9  -2    7.74    0.74
   6  -9   2   20.30    1.04
  -6   9  -2   23.21    1.15
   7  -9   2   39.73    1.52
  -7   9  -2   41.22    1.65
   8  -9   2    0.15    0.24
  -8   9  -2    0.16    0.29
  -9   9  -2   62.83    2.28
 -10   9  -2    1.08    0.47
 -11   9  -2    5.15    0.80
 -12   9  -2    9.83    1.07
 -13  -9  -2    5.49    0.60
 -13   9  -2    4.93    0.83
 -14  -9  -2   17.64    0.95
 -14   9  -2   16.70    1.34
 -15  -9  -2    1.12    0.35
 -15   9  -2    0.04    0.46
 -16   9  -2    4.54    0.90
 -17   9  -2   -0.57    0.52
 -18   9  -2    0.65    0.61
 -19   9  -2    4.08    0.89
 -20   9  -2    0.28    0.63
 -20  10   2   -0.05    0.61
 -19  10   2   13.27    1.48
 -18  10   2    6.38    1.05
 -17  10   2   11.87    1.31
 -16  10   2    9.75    1.17
 -15  10   2    6.64    1.00
 -14  10   2   -0.04    0.40
 -13  10   2   12.84    1.25
 -12  10   2   -0.12    0.39
 -11  10   2    2.41    0.61
 -10  10   2   14.65    1.08
  -9 -10   2   97.10    2.28
  -9  10   2   97.19    2.98
  -8 -10   2   47.63    1.35
  -8  10   2   48.22    1.87
  -7 -10   2    1.93    0.29
   7 -10  -2    2.14    0.44
  -7 -10   2    1.65    0.27
  -7  10   2    1.84    0.45
  -6 -10   2    0.13    0.16
   6 -10  -2    0.50    0.26
  -6 -10   2    0.19    0.16
  -6  10   2   -0.16    0.21
  -5 -10   2    4.68    0.45
   5 -10  -2    3.97    0.55
  -5  10   2    3.66    0.54
  -4 -10   2   49.19    1.45
   4 -10  -2   47.73    1.65
  -4  10   2   47.47    1.69
  -3 -10   2    0.47    0.21
   3 -10  -2    0.50    0.26
  -3  10   2   -0.02    0.22
  -2 -10   2  155.83    3.61
   2 -10  -2  158.32    3.79
   2  10  -2  155.18    3.55
  -2  10   2  159.98    3.83
   1 -10  -2  516.70   10.49
  -1 -10   2  517.41   10.37
   1  10  -2  508.61   10.31
  -1  10   2  512.58   10.51
   0 -10  -2  256.22    5.76
   0 -10   2  270.19    5.74
   0  10   2  266.94    5.79
   0  10  -2  267.37    5.72
   1 -10   2    0.34    0.19
  -1 -10  -2    0.02    0.18
   1  10   2    0.26    0.21
  -1  10  -2    0.19    0.20
   2 -10   2    2.91    0.45
  -2 -10  -2    3.11    0.44
   2  10   2    2.86    0.44
  -2  10  -2    2.73    0.44
  -3 -10  -2  161.58    3.78
   3 -10   2  161.43    3.91
   3  10   2  162.22    3.76
  -3  10  -2  165.07    3.98
  -4 -10  -2    7.84    0.58
   4 -10   2    6.82    0.68
  -4  10  -2    8.09    0.78
  -5 -10  -2   23.80    0.99
   5 -10   2   21.26    1.08
  -5  10  -2   23.19    1.17
   6 -10   2   12.71    0.86
  -6  10  -2   13.28    0.93
   7 -10   2   70.13    2.22
  -7  10  -2   70.42    2.37
   8 -10   2    3.49    0.54
  -8  10  -2    2.88    0.57
  -9  10  -2    7.71    0.91
 -10  10  -2    2.72    0.62
 -11  10  -2    0.25    0.39
 -12  10  -2    1.92    0.58
 -13 -10  -2    1.50    0.41
 -13  10  -2    0.98    0.49
 -14 -10  -2    0.53    0.33
 -14  10  -2    0.04    0.48
 -15 -10  -2    7.75    0.70
 -15  10  -2    7.91    1.10
 -16  10  -2    2.81    0.78
 -17  10  -2    0.52    0.64
 -18  10  -2    0.30    0.61
 -19  10  -2    0.10    0.59
 -20  11   2    7.09    1.16
 -19  11   2    0.42    0.60
 -18  11   2    0.88    0.62
 -17  11   2    0.82    0.63
 -16  11   2    3.87    0.83
 -15  11   2    2.22    0.73
 -14  11   2    1.72    0.63
 -13  11   2    1.03    0.51
 -12  11   2   23.82    1.52
 -11  11   2    0.00    0.37
 -10  11   2    7.61    0.91
  -9 -11   2   12.28    0.68
  -9  11   2   13.70    1.05
  -8 -11   2   24.58    0.94
  -8  11   2   27.19    1.40
  -7 -11   2   16.01    0.74
   7 -11  -2   14.95    0.97
  -7  11   2   14.12    1.01
   6 -11  -2   21.69    1.14
  -6 -11   2   22.72    0.91
  -6  11   2   21.91    1.21
  -5 -11   2   50.69    1.55
   5 -11  -2   49.99    1.80
  -5  11   2   52.05    1.88
  -4 -11   2  173.68    3.95
   4 -11  -2  170.78    4.21
  -4  11   2  176.06    4.29
  -3 -11   2   87.93    2.30
   3 -11  -2   85.85    2.49
  -3  11   2   82.94    2.48
   2 -11  -2  178.11    4.28
  -2 -11   2  174.98    4.11
   2  11  -2  183.89    4.06
  -2  11   2  181.00    4.31
   1 -11  -2  334.24    7.13
  -1 -11   2  345.52    7.05
  -1  11   2  323.64    7.12
   1  11  -2  317.74    6.94
   0 -11   2    7.67    0.70
   0 -11  -2    7.14    0.67
   0  11   2    7.41    0.68
   0  11  -2    8.09    0.64
   1 -11   2    2.57    0.43
  -1 -11  -2    3.43    0.48
   1  11   2    3.75    0.49
  -1  11  -2    3.62    0.50
   2 -11   2   81.07    2.40
  -2 -11  -2   86.28    2.37
  -2  11  -2   85.27    2.44
   2  11   2   85.79    2.36
   3 -11   2   29.70    1.29
  -3 -11  -2   29.61    1.21
  -3  11  -2   27.01    1.26
   3  11   2   29.69    1.19
   4 -11   2    2.39    0.44
  -4 -11  -2    2.75    0.42
  -4  11  -2    2.65    0.49
  -5 -11  -2    0.26    0.22
   5 -11   2    0.25    0.24
  -5  11  -2    0.24    0.29
   6 -11   2    1.35    0.40
  -6  11  -2    1.17    0.42
   7 -11   2   13.08    0.94
  -7  11  -2   12.37    0.98
   8 -11   2   12.22    0.93
  -8  11  -2   12.91    1.16
  -9  11  -2    0.19    0.33
 -10  11  -2   18.26    1.28
 -11  11  -2    0.04    0.36
 -12  11  -2    0.25    0.44
 -13  11  -2    4.38    0.86
 -14 -11  -2   14.60    0.91
 -14  11  -2   11.52    1.37
 -15 -11  -2    1.31    0.36
 -15  11  -2    0.45    0.54
 -16  11  -2    1.58    0.67
 -17  11  -2    8.89    1.25
 -18  11  -2    4.35    0.99
 -19  11  -2    0.04    0.58
 -19  12   2   12.25    1.49
 -18  12   2    1.06    0.64
 -17  12   2    5.03    0.98
 -16  12   2    4.04    0.89
 -15  12   2    2.37    0.71
 -14  12   2    0.05    0.44
 -13  12   2    0.78    0.51
 -12  12   2   29.54    1.74
 -11  12   2    3.91    0.78
 -10 -12   2   11.24    0.65
 -10  12   2   12.22    1.20
  -9 -12   2    1.09    0.29
  -9  12   2    2.38    0.58
  -8 -12   2   26.01    1.03
  -8  12   2   28.60    1.51
  -7 -12   2   13.75    0.74
   7 -12  -2   13.26    0.97
  -7  12   2   12.98    1.01
   6 -12  -2   27.51    1.35
  -6 -12   2   27.87    1.10
  -6  12   2   25.64    1.38
   5 -12  -2  258.51    5.94
  -5 -12   2  258.16    5.59
  -5  12   2  256.00    6.02
   4 -12  -2  226.62    5.31
  -4 -12   2  224.28    5.03
  -4  12   2  226.18    5.38
  -3 -12   2   55.16    1.72
   3 -12  -2   50.76    1.84
  -3  12   2   52.24    1.88
   3  12  -2   50.74    1.58
   2 -12  -2   27.21    1.25
  -2 -12   2   24.48    1.11
  -2  12   2   27.91    1.26
   2  12  -2   27.26    1.10
   1 -12  -2   59.50    1.97
  -1 -12   2   61.52    1.92
   1  12  -2   59.64    1.85
  -1  12   2   59.11    1.97
   0 -12   2   77.32    2.28
   0 -12  -2   75.61    2.29
   0  12   2   75.91    2.28
   0  12  -2   77.08    2.23
  -1 -12  -2   -0.46    0.14
   1 -12   2    0.61    0.29
   1  12   2    0.14    0.23
  -1  12  -2    0.17    0.22
   2 -12   2    9.37    0.76
  -2 -12  -2   10.00    0.75
   2  12   2   10.07    0.73
  -2  12  -2   11.18    0.79
  -3 -12  -2   40.77    1.52
   3 -12   2   45.16    1.66
   3  12   2   43.14    1.53
  -3  12  -2   42.77    1.65
  -4 -12  -2    6.36    0.65
   4 -12   2    5.85    0.69
   4  12   2    6.66    0.64
  -4  12  -2    6.10    0.71
  -5 -12  -2   26.22    1.14
   5 -12   2   22.45    1.20
  -5  12  -2   24.66    1.31
   6 -12   2    2.15    0.50
  -6  12  -2    1.65    0.48
   7 -12   2   11.22    1.00
  -7  12  -2   13.04    1.04
   8 -12   2   16.69    1.09
  -8  12  -2   17.15    1.22
  -9  12  -2    9.86    1.06
 -10  12  -2   14.77    1.20
 -11  12  -2   11.23    1.19
 -12  12  -2    4.31    0.86
 -13  12  -2    4.28    0.92
 -14 -12  -2   20.77    1.11
 -14  12  -2   24.32    1.71
 -15 -12  -2    0.30    0.31
 -15  12  -2    0.41    0.54
 -16  12  -2    0.57    0.58
 -17  12  -2    0.71    0.62
 -18  12  -2    3.73    0.95
 -19  12  -2    0.14    0.66
 -19  13   2    0.29    0.59
 -18  13   2    0.38    0.61
 -17  13   2    1.14    0.68
 -16  13   2    1.17    0.64
 -15  13   2    0.55    0.58
 -14  13   2    2.52    0.69
 -13  13   2   16.91    1.58
 -12  13   2    0.90    0.52
 -11  13   2    0.17    0.44
 -10 -13   2    0.65    0.26
 -10  13   2    0.15    0.41
  -9 -13   2   11.76    0.76
  -9  13   2   14.41    1.17
  -8 -13   2   20.60    0.96
  -8  13   2   18.11    1.29
   7 -13  -2    3.78    0.63
  -7 -13   2    4.06    0.51
  -7  13   2    3.67    0.68
  -6 -13   2  195.68    4.56
   6 -13  -2  207.88    5.00
  -6  13   2  199.56    5.08
   5 -13  -2    3.06    0.60
  -5 -13   2    3.82    0.54
  -5  13   2    2.81    0.59
  -4 -13   2  342.44    7.24
   4 -13  -2  344.77    7.54
  -4  13   2  327.79    7.57
  -3 -13   2   71.29    2.14
   3 -13  -2   71.49    2.32
   3  13  -2   69.25    2.01
  -3  13   2   70.84    2.34
  -2 -13   2   10.39    0.76
   2 -13  -2   11.59    0.85
   2  13  -2    8.52    0.65
  -2  13   2    6.92    0.75
   1 -13  -2    1.66    0.41
  -1 -13   2    0.26    0.23
  -1  13   2    0.12    0.25
   1  13  -2    0.41    0.24
   0 -13   2    0.57    0.28
   0 -13  -2    0.51    0.29
   0  13  -2    0.38    0.26
   0  13   2    0.59    0.30
   1 -13   2    0.35    0.26
  -1 -13  -2   -0.05    0.19
  -1  13  -2    0.27    0.23
   1  13   2    0.22    0.26
  -2 -13  -2    1.33    0.35
   2 -13   2    1.60    0.40
  -2  13  -2    0.89    0.32
   2  13   2    1.13    0.35
   3 -13   2    2.38    0.47
  -3 -13  -2    3.04    0.50
   3  13   2    3.70    0.55
  -3  13  -2    2.70    0.50
   4 -13   2    7.79    0.82
  -4 -13  -2    8.32    0.77
  -4  13  -2    6.23    0.75
   4  13   2    7.62    0.72
  -5 -13  -2   10.65    0.79
   5 -13   2    9.97    0.93
  -5  13  -2    9.02    0.91
   6 -13   2    5.09    0.71
  -6 -13  -2    5.74    0.65
  -6  13  -2    4.36    0.72
   7 -13   2   55.86    2.08
  -7  13  -2   56.21    2.22
   8 -13   2    0.65    0.38
  -8  13  -2    0.05    0.36
  -9  13  -2   21.84    1.42
 -10  13  -2   22.42    1.49
 -11  13  -2   12.12    1.27
 -12  13  -2   -0.95    0.38
 -13  13  -2    9.90    1.26
 -14 -13  -2    1.47    0.44
 -14  13  -2    0.73    0.60
 -15 -13  -2    2.42    0.48
 -15  13  -2    3.13    0.87
 -16  13  -2   -0.33    0.51
 -17  13  -2    1.01    0.67
 -18  13  -2    0.22    0.56
 -19  13  -2   -0.11    0.64
 -19  14   2    1.41    0.75
 -18  14   2    1.52    0.77
 -17  14   2    0.76    0.66
 -16  14   2    1.41    0.72
 -15  14   2    4.31    0.93
 -14  14   2    1.72    0.67
 -13  14   2    8.81    1.17
 -12  14   2   12.10    1.29
 -11  14   2    2.83    0.74
 -10 -14   2   16.70    0.90
 -10  14   2   16.30    1.31
  -9 -14   2    2.08    0.40
  -9  14   2    2.77    0.65
  -8 -14   2   14.76    0.89
  -8  14   2   15.31    1.19
   7 -14  -2   64.69    2.35
  -7 -14   2   65.94    2.01
  -7  14   2   68.05    2.50
  -6 -14   2   98.69    2.66
   6 -14  -2   95.10    2.98
  -6  14   2   95.42    3.08
  -5 -14   2  302.10    6.62
   5 -14  -2  312.67    7.01
  -5  14   2  294.63    7.05
   4 -14  -2   65.63    2.29
  -4 -14   2   64.16    2.05
  -4  14   2   67.52    2.36
  -3 -14   2   69.64    2.15
   3 -14  -2   66.67    2.31
  -3  14   2   69.07    2.36
   3  14  -2   66.52    2.01
   2 -14  -2   15.14    1.05
  -2 -14   2   15.84    0.96
  -2  14   2   16.51    1.06
   2  14  -2   17.34    0.94
  -1 -14   2   12.10    0.84
   1 -14  -2   11.03    0.89
  -1  14   2   11.56    0.89
   1  14  -2   10.45    0.78
   0 -14   2   10.56    0.81
   0 -14  -2    9.02    0.85
   0  14   2    9.77    0.90
   0  14  -2   11.11    0.82
   1 -14   2    7.38    0.78
  -1 -14  -2    8.07    0.79
   1  14   2   10.07    0.80
  -1  14  -2    7.52    0.77
  -2 -14  -2   11.41    0.88
   2 -14   2   12.73    0.93
  -2  14  -2   11.35    0.89
   2  14   2   11.59    0.85
   3 -14   2   45.50    1.80
  -3 -14  -2   46.88    1.74
   3  14   2   46.39    1.71
  -3  14  -2   47.46    1.84
   4 -14   2    2.33    0.51
  -4 -14  -2    2.27    0.45
  -4  14  -2    2.50    0.54
  -5 -14  -2    4.52    0.59
   5 -14   2    4.79    0.67
  -5  14  -2    3.75    0.65
  -6 -14  -2   10.44    0.82
   6 -14   2   10.30    1.00
  -6  14  -2    7.22    0.89
   7 -14   2   22.14    1.31
  -7  14  -2   20.50    1.38
  -8  14  -2   10.24    1.11
  -9  14  -2    0.24    0.42
 -10  14  -2    2.64    0.67
 -11  14  -2   17.48    1.41
 -12  14  -2   11.20    1.30
 -13  14  -2    0.47    0.56
 -14  14  -2   12.88    1.46
 -15 -14  -2    0.03    0.33
 -15  14  -2    0.15    0.55
 -16  14  -2    2.23    0.78
 -17  14  -2   -0.59    0.51
 -18  14  -2   -0.56    0.64
 -19  15   2   -0.07    0.69
 -18  15   2   -1.19    0.52
 -17  15   2    2.13    0.86
 -16  15   2   -0.66    0.53
 -15  15   2    6.59    1.14
 -14  15   2    1.43    0.68
 -13  15   2   -0.27    0.45
 -12  15   2    7.90    1.12
 -11  15   2   -0.29    0.43
 -10 -15   2    7.75    0.72
 -10  15   2    6.11    0.99
  -9 -15   2    1.27    0.38
  -9  15   2    2.32    0.64
  -8 -15   2   10.23    0.79
  -8  15   2   10.31    1.12
   7 -15  -2   33.52    1.66
  -7 -15   2   30.01    1.32
  -7  15   2   31.90    1.70
   6 -15  -2  142.84    3.88
  -6 -15   2  133.98    3.46
  -6  15   2  125.64    3.87
  -5 -15   2   18.12    1.06
   5 -15  -2   18.27    1.27
  -5  15   2   20.40    1.33
  -4 -15   2   45.42    1.68
   4 -15  -2   47.48    1.92
  -4  15   2   40.54    1.84
  -3 -15   2   -0.17    0.21
   3 -15  -2    0.00    0.29
   3  15  -2    0.04    0.25
  -3  15   2    0.29    0.32
  -2 -15   2   43.51    1.70
   2 -15  -2   43.98    1.83
   2  15  -2   43.36    1.62
  -2  15   2   44.78    1.82
   1 -15  -2   47.02    1.89
  -1 -15   2   46.97    1.80
   1  15  -2   51.26    1.80
  -1  15   2   46.61    1.85
   0 -15   2   78.84    2.48
   0 -15  -2   75.21    2.49
   0  15  -2   73.60    2.38
   0  15   2   77.88    2.48
  -1 -15  -2   81.60    2.60
   1 -15   2   80.25    2.61
  -1  15  -2   85.73    2.63
   1  15   2   84.90    2.60
  -2 -15  -2    8.59    0.89
   2 -15   2   10.44    0.99
  -2  15  -2    8.85    0.89
   2  15   2   10.10    0.94
   3 -15   2    8.47    0.92
  -3 -15  -2    8.82    0.88
   3  15   2   10.81    0.86
  -3  15  -2    8.84    0.92
   4 -15   2    0.30    0.32
  -4 -15  -2    1.28    0.40
  -4  15  -2    1.18    0.44
   5 -15   2    0.08    0.30
  -5 -15  -2   -0.15    0.25
  -5  15  -2    0.18    0.34
  -6 -15  -2    1.67    0.43
   6 -15   2    1.05    0.43
  -6  15  -2    0.71    0.44
   7 -15   2   25.35    1.45
  -7  15  -2   26.53    1.56
  -8  15  -2    4.11    0.77
  -9  15  -2    1.29    0.55
 -10  15  -2    0.57    0.49
 -11  15  -2   11.44    1.33
 -12  15  -2    0.09    0.52
 -13  15  -2    2.39    0.75
 -14  15  -2   -0.14    0.48
 -15 -15  -2   -0.14    0.32
 -15  15  -2   -0.72    0.45
 -16  15  -2    8.76    1.29
 -17  15  -2   -0.25    0.62
 -18  15  -2    8.42    1.38
 -18  16   2   -0.45    0.71
 -17  16   2   11.07    1.48
 -16  16   2    3.10    0.95
 -15  16   2   11.23    1.44
 -14  16   2    6.74    1.17
 -13  16   2    6.32    1.10
 -12  16   2    1.54    0.63
 -11  16   2   16.24    1.57
 -10 -16   2    6.10    0.67
 -10  16   2    4.46    0.88
  -9 -16   2    3.29    0.54
  -9  16   2    3.98    0.82
  -8 -16   2   12.90    0.91
  -8  16   2   12.86    1.28
  -7 -16   2    5.78    0.69
   7 -16  -2    5.66    0.82
  -7  16   2    6.94    0.95
   6 -16  -2   22.79    1.41
  -6 -16   2   21.89    1.17
  -6  16   2   24.07    1.48
   5 -16  -2   52.96    2.13
  -5 -16   2   53.68    1.91
  -5  16   2   48.48    2.13
   4 -16  -2    2.76    0.58
  -4 -16   2    2.92    0.53
  -4  16   2    2.66    0.62
   3 -16  -2    1.01    0.41
  -3 -16   2    1.59    0.42
  -3  16   2    1.53    0.50
  -2 -16   2   24.60    1.29
   2 -16  -2   26.23    1.41
   2  16  -2   26.77    1.27
  -2  16   2   25.25    1.40
  -1 -16   2    0.12    0.31
   1 -16  -2    0.58    0.38
  -1  16   2    0.29    0.34
   1  16  -2    0.50    0.37
   0 -16   2   78.15    2.60
   0 -16  -2   86.64    2.72
   0  16   2   76.25    2.59
   0  16  -2   81.70    2.57
  -1 -16  -2  177.13    4.52
   1 -16   2  166.36    4.47
  -1  16  -2  172.62    4.51
   1  16   2  176.94    4.48
   2 -16   2   50.55    2.02
  -2 -16  -2   50.57    2.03
   2  16   2   53.60    1.99
  -2  16  -2   53.54    2.07
   3 -16   2   36.68    1.68
  -3 -16  -2   34.55    1.61
  -3  16  -2   36.58    1.70
   4 -16   2    0.04    0.31
  -4 -16  -2    0.65    0.36
  -4  16  -2   -0.10    0.30
   5 -16   2   74.49    2.60
  -5 -16  -2   77.45    2.48
  -5  16  -2   70.19    2.66
   6 -16   2   18.51    1.24
  -6 -16  -2   17.88    1.13
  -6  16  -2   18.13    1.29
   7 -16   2    6.97    0.91
  -7  16  -2    8.95    1.10
  -8  16  -2    0.37    0.46
  -9  16  -2   19.47    1.46
 -10  16  -2    2.53    0.73
 -11  16  -2    0.50    0.58
 -12  16  -2   -0.29    0.45
 -13  16  -2    2.26    0.81
 -14  16  -2   -0.20    0.47
 -15 -16  -2    1.62    0.47
 -15  16  -2    1.49    0.77
 -16  16  -2    0.72    0.63
 -17  16  -2   -0.83    0.55
 -18  16  -2    2.06    0.93
 -18  17   2   -0.83    0.63
 -17  17   2    0.52    0.76
 -16  17   2   -0.11    0.61
 -15  17   2    0.17    0.54
 -14  17   2    1.14    0.67
 -13  17   2   -0.11    0.50
 -12  17   2    0.37    0.52
 -11  17   2   43.57    2.32
 -10 -17   2   33.18    1.49
 -10  17   2   36.30    2.07
  -9 -17   2    0.29    0.35
  -9  17   2   -0.11    0.47
  -8 -17   2    7.33    0.82
  -8  17   2    6.81    1.04
  -7 -17   2    1.13    0.42
   7 -17  -2    1.55    0.55
  -7  17   2    1.19    0.53
   6 -17  -2    1.18    0.46
  -6 -17   2    0.55    0.34
  -6  17   2    0.65    0.44
  -5 -17   2    0.17    0.30
   5 -17  -2    0.33    0.38
  -5  17   2    0.14    0.35
   4 -17  -2    9.25    1.03
  -4 -17   2   11.17    1.01
  -4  17   2    8.99    1.03
  -3 -17   2   15.71    1.06
   3 -17  -2   14.52    1.16
  -3  17   2   16.45    1.21
   2 -17  -2    7.33    0.90
  -2 -17   2    6.59    0.80
  -2  17   2    7.71    0.91
  -1 -17   2   14.89    1.08
   1 -17  -2   17.15    1.22
  -1  17   2   16.65    1.16
   1  17  -2   15.52    1.06
   0 -17   2  140.83    3.86
   0 -17  -2  132.90    3.86
   0  17   2  132.44    3.81
   0  17  -2  138.20    3.78
   1 -17   2  138.54    3.97
  -1 -17  -2  147.22    4.04
   1  17   2  141.45    3.93
  -1  17  -2  145.48    3.97
  -2 -17  -2    2.54    0.61
   2 -17   2    3.83    0.68
  -2  17  -2    4.57    0.73
   2  17   2    3.39    0.64
   3 -17   2   11.28    1.12
  -3 -17  -2   15.08    1.11
  -3  17  -2   13.06    1.07
   4 -17   2    5.87    0.80
  -4 -17  -2    5.88    0.76
  -4  17  -2    6.14    0.86
  -5 -17  -2   19.14    1.21
   5 -17   2   18.11    1.27
  -5  17  -2   16.83    1.29
  -6 -17  -2    2.92    0.58
   6 -17   2    3.86    0.72
  -6  17  -2    3.74    0.75
   7 -17   2    2.93    0.68
  -7  17  -2    2.87    0.73
  -8  17  -2    1.50    0.68
  -9  17  -2    6.31    1.04
 -10  17  -2    4.47    0.95
 -11  17  -2    5.20    1.05
 -12  17  -2    4.02    0.95
 -13  17  -2    0.31    0.54
 -14  17  -2   -0.74    0.49
 -15  17  -2    0.66    0.65
 -16  17  -2    1.63    0.81
 -17  17  -2    0.99    0.75
 -18  17  -2    7.72    1.38
 -18  18   2   -0.23    0.74
 -17  18   2    1.52    0.80
 -16  18   2   -0.27    0.54
 -15  18   2    0.01    0.59
 -14  18   2    2.23    0.77
 -13  18   2    0.21    0.53
 -12  18   2    3.39    0.89
 -11  18   2   11.00    1.42
 -10 -18   2   87.23    2.71
 -10  18   2   92.32    3.51
  -9 -18   2   12.59    1.03
  -9  18   2   13.71    1.50
  -8 -18   2   21.00    1.28
  -8  18   2   20.18    1.57
   7 -18  -2   22.20    1.51
  -7 -18   2   15.87    1.17
  -7  18   2   19.82    1.50
   6 -18  -2   39.78    1.97
  -6 -18   2   36.68    1.67
  -6  18   2   40.94    2.07
  -5 -18   2    5.38    0.73
   5 -18  -2    5.24    0.84
  -5  18   2    6.26    0.95
   4 -18  -2   25.95    1.55
  -4 -18   2   23.37    1.32
  -4  18   2   24.90    1.52
  -3 -18   2   28.53    1.47
   3 -18  -2   32.66    1.71
  -3  18   2   28.34    1.63
  -2 -18   2    6.37    0.82
   2 -18  -2    8.53    0.98
  -2  18   2    8.40    1.02
  -1 -18   2   32.21    1.61
   1 -18  -2   35.55    1.75
   1  18  -2   33.41    1.56
  -1  18   2   31.63    1.65
   0 -18   2   84.63    2.80
   0 -18  -2   79.67    2.79
   0  18   2   78.45    2.73
   0  18  -2   76.41    2.64
  -1 -18  -2   41.78    1.91
   1 -18   2   41.50    1.91
   1  18   2   44.71    1.91
  -1  18  -2   41.27    1.87
  -2 -18  -2   37.82    1.81
   2 -18   2   40.48    1.87
  -2  18  -2   40.88    1.87
  -3 -18  -2    4.76    0.74
   3 -18   2    4.52    0.76
  -3  18  -2    3.22    0.70
  -4 -18  -2    0.47    0.38
   4 -18   2    0.73    0.45
  -4  18  -2   -0.09    0.35
  -5 -18  -2    5.58    0.76
   5 -18   2    5.80    0.87
  -5  18  -2    4.11    0.77
   6 -18   2    4.26    0.77
  -6 -18  -2    3.27    0.64
  -6  18  -2    3.69    0.78
   7 -18   2    0.02    0.46
  -7  18  -2    0.38    0.56
  -8  18  -2    2.83    0.81
  -9  18  -2    9.88    1.30
 -10  18  -2    1.73    0.76
 -11  18  -2   -0.31    0.50
 -12  18  -2   19.06    1.84
 -13  18  -2    2.20    0.79
 -14  18  -2    3.07    0.93
 -15  18  -2    0.57    0.69
 -16  18  -2   23.11    2.17
 -17  18  -2    3.15    0.99
 -17  19   2   -0.64    0.57
 -16  19   2    0.18    0.63
 -15  19   2    0.96    0.67
 -14  19   2    2.44    0.86
 -13  19   2    0.27    0.60
 -12  19   2    4.50    0.97
 -11  19   2   49.45    2.59
 -10 -19   2    4.41    0.73
 -10  19   2    5.16    1.05
  -9 -19   2    6.20    0.81
  -9  19   2    6.32    1.07
  -8 -19   2   17.47    1.27
  -8  19   2   21.04    1.62
  -7 -19   2   -0.15    0.40
   7 -19  -2    0.05    0.47
  -7  19   2    0.28    0.52
  -6 -19   2   10.54    1.03
   6 -19  -2    8.06    1.09
  -6  19   2   13.85    1.45
  -5 -19   2    7.16    0.88
   5 -19  -2    6.94    1.00
  -5  19   2    5.89    0.94
  -4 -19   2    1.50    0.49
   4 -19  -2    1.36    0.52
  -4  19   2    1.59    0.58
   3 -19  -2    6.00    0.93
  -3 -19   2    5.46    0.80
  -3  19   2    3.90    0.80
   2 -19  -2   61.95    2.51
  -2 -19   2   60.20    2.33
  -2  19   2   61.79    2.48
   1 -19  -2   -0.33    0.30
  -1 -19   2    0.28    0.36
  -1  19   2   -0.26    0.33
   0 -19  -2    0.61    0.43
   0 -19   2    1.51    0.51
   0  19   2    0.87    0.46
   0  19  -2    1.91    0.54
   1 -19   2   28.41    1.56
  -1 -19  -2   28.37    1.60
   1  19   2   26.11    1.50
  -1  19  -2   29.97    1.58
   2 -19   2    0.16    0.35
  -2 -19  -2    0.29    0.37
  -2  19  -2    0.18    0.36
  -3 -19  -2    5.40    0.81
   3 -19   2    7.42    0.97
  -3  19  -2    5.53    0.87
   4 -19   2    7.17    0.98
  -4 -19  -2    7.46    0.92
  -4  19  -2    6.68    0.99
   5 -19   2   28.24    1.67
  -5 -19  -2   28.66    1.57
  -5  19  -2   27.37    1.70
   6 -19   2   18.97    1.41
  -6 -19  -2   19.06    1.31
  -6  19  -2   21.19    1.54
   7 -19   2    3.79    0.81
  -7  19  -2    5.50    1.02
  -8  19  -2    2.47    0.79
  -9  19  -2    5.88    1.08
 -10  19  -2   -0.06    0.53
 -11  19  -2   10.38    1.39
 -12  19  -2    1.50    0.76
 -13  19  -2    1.67    0.78
 -14  19  -2    0.31    0.67
 -15  19  -2   15.00    1.82
 -16  19  -2    7.86    1.38
 -17  19  -2    5.75    1.23
 -17  20   2    1.04    0.87
 -16  20   2    1.87    0.88
 -15  20   2   14.15    1.70
 -14  20   2    2.18    0.91
 -13  20   2   -0.92    0.62
 -12  20   2    0.29    0.69
 -11  20   2    0.06    0.53
 -10 -20   2   41.73    1.82
 -10  20   2   42.24    2.40
  -9 -20   2    3.39    0.66
  -9  20   2    2.79    0.84
  -8 -20   2    4.50    0.76
  -8  20   2    5.98    1.09
   7 -20  -2    9.16    1.15
  -7 -20   2    6.62    0.91
  -7  20   2    8.38    1.20
   6 -20  -2    6.72    1.01
  -6 -20   2    6.53    0.89
  -6  20   2    8.14    1.13
  -5 -20   2    0.24    0.38
   5 -20  -2   -0.42    0.36
  -5  20   2   -0.21    0.45
   4 -20  -2    0.33    0.45
  -4 -20   2    0.28    0.40
  -4  20   2    1.07    0.56
  -3 -20   2    3.03    0.69
   3 -20  -2    2.88    0.76
  -3  20   2    2.72    0.77
   2 -20  -2   53.11    2.35
  -2 -20   2   50.69    2.17
  -2  20   2   50.39    2.29
   1 -20  -2   20.20    1.44
  -1 -20   2   17.51    1.28
  -1  20   2   20.74    1.42
   0 -20   2   11.70    1.23
   0 -20  -2   11.92    1.24
   0  20   2   10.15    1.13
   0  20  -2   13.96    1.28
  -1 -20  -2   33.73    1.79
   1 -20   2   33.28    1.77
  -1  20  -2   34.15    1.77
  -2 -20  -2    0.50    0.38
   2 -20   2    0.39    0.42
  -2  20  -2    0.22    0.44
  -3 -20  -2    0.25    0.39
   3 -20   2   -0.65    0.31
  -3  20  -2   -0.59    0.37
   4 -20   2    4.16    0.85
  -4 -20  -2    4.11    0.78
  -4  20  -2    4.05    0.87
  -5 -20  -2  102.54    3.38
   5 -20   2  113.44    3.67
  -5  20  -2  106.73    3.72
  -6 -20  -2   27.91    1.61
   6 -20   2   29.18    1.78
  -6  20  -2   28.53    1.84
   7 -20   2    4.17    0.81
  -7  20  -2    4.76    0.95
  -8  20  -2    3.80    0.92
  -9  20  -2    2.01    0.74
 -10  20  -2   -0.23    0.52
 -11  20  -2   -0.02    0.59
 -12  20  -2    2.74    0.89
 -13  20  -2   -0.86    0.57
 -14  20  -2   -0.12    0.65
 -15  20  -2   11.03    1.60
 -16  20  -2   19.50    2.08
 -16  21   2    1.68    0.91
 -15  21   2    5.08    1.17
 -14  21   2    6.76    1.30
 -13  21   2   -0.83    0.65
 -12  21   2    0.86    0.80
 -11  21   2   -0.01    0.54
 -10 -21   2    0.08    0.35
 -10  21   2   -0.35    0.49
  -9 -21   2    0.75    0.46
  -9  21   2    0.89    0.65
  -8 -21   2    0.60    0.40
  -8  21   2    0.19    0.54
  -7 -21   2    6.49    0.91
  -7  21   2    7.67    1.16
  -6 -21   2    3.53    0.70
   6 -21  -2    3.50    0.81
  -6  21   2    3.12    0.82
   5 -21  -2    0.05    0.42
  -5 -21   2    0.76    0.45
  -5  21   2   -0.39    0.45
   4 -21  -2   11.45    1.30
  -4 -21   2    6.93    0.98
  -4  21   2   10.65    1.28
   3 -21  -2   41.62    2.16
  -3 -21   2   46.24    2.11
  -3  21   2   40.60    2.15
   2 -21  -2    7.93    1.10
  -2 -21   2   10.74    1.20
  -2  21   2    9.30    1.18
  -1 -21   2   -0.29    0.32
   1 -21  -2   -0.09    0.34
  -1  21   2   -0.39    0.39
   0 -21   2   35.06    1.84
   0 -21  -2   34.61    1.88
   0  21   2   31.26    1.76
  -1 -21  -2    1.05    0.55
   1 -21   2    1.19    0.59
  -1  21  -2    1.06    0.55
  -2 -21  -2    3.30    0.72
   2 -21   2    4.85    0.86
  -2  21  -2    3.34    0.75
  -3 -21  -2   -0.12    0.37
   3 -21   2   -0.06    0.45
  -3  21  -2    0.28    0.51
   4 -21   2   52.94    2.42
  -4 -21  -2   52.65    2.33
  -4  21  -2   53.33    2.45
   5 -21   2   17.64    1.64
  -5 -21  -2   19.39    1.49
  -5  21  -2   16.87    1.65
  -6 -21  -2   51.15    2.23
   6 -21   2   50.07    2.40
  -6  21  -2   46.63    2.44
   7 -21   2    6.61    1.06
  -7  21  -2    5.62    1.05
  -8  21  -2    3.11    0.87
  -9  21  -2    0.85    0.65
 -10  21  -2    0.08    0.53
 -11  21  -2   -0.32    0.52
 -12  21  -2   -0.57    0.60
 -13  21  -2    1.67    0.88
 -14  21  -2    0.76    0.78
 -15  21  -2    8.82    1.51
 -16  21  -2   21.26    2.23
 -16  22   2   10.88    1.63
 -15  22   2   12.27    1.74
 -14  22   2    2.92    1.01
 -13  22   2   -0.19    0.74
 -12  22   2    1.23    0.82
 -11  22   2    1.76    0.81
 -10 -22   2    2.17    0.59
 -10  22   2    1.75    0.79
  -9 -22   2    1.80    0.59
  -9  22   2    1.03    0.70
  -8 -22   2    1.96    0.57
  -8  22   2    2.30    0.83
  -7 -22   2    7.02    0.97
  -7  22   2    3.90    0.95
  -6 -22   2   20.36    1.43
   6 -22  -2   22.33    1.69
  -6  22   2   25.16    1.79
  -5 -22   2    1.72    0.60
   5 -22  -2    1.65    0.63
  -5  22   2    1.64    0.66
  -4 -22   2   17.93    1.36
   4 -22  -2   14.83    1.50
  -4  22   2   15.82    1.56
   3 -22  -2    7.60    1.11
  -3 -22   2    6.93    1.03
  -3  22   2    8.94    1.20
   2 -22  -2   17.45    1.61
  -2 -22   2   12.76    1.31
  -2  22   2   14.36    1.44
   1 -22  -2    2.22    0.66
  -1 -22   2    2.33    0.65
  -1  22   2    1.97    0.66
   0 -22  -2    1.86    0.61
   0 -22   2    0.52    0.49
  -1 -22  -2   43.09    2.14
   1 -22   2   39.27    2.04
   2 -22   2    9.00    1.16
  -2 -22  -2    9.10    1.14
  -2  22  -2   10.58    1.26
   3 -22   2   -0.33    0.44
  -3 -22  -2    0.34    0.43
  -3  22  -2   -1.43    0.37
  -4 -22  -2    0.15    0.46
   4 -22   2   -0.05    0.50
  -4  22  -2   -0.13    0.52
  -5 -22  -2   91.39    3.25
   5 -22   2   91.23    3.43
  -5  22  -2   93.37    3.51
   6 -22   2   14.60    1.53
  -6 -22  -2   15.92    1.30
  -6  22  -2   15.51    1.59
  -7  22  -2    0.26    0.58
  -8  22  -2   -0.35    0.55
  -9  22  -2    1.93    0.82
 -10  22  -2   -0.05    0.62
 -11  22  -2   11.32    1.56
 -12  22  -2   14.16    1.78
 -13  22  -2    0.14    0.66
 -14  22  -2    0.06    0.72
 -15  22  -2    1.37    0.95
 -16  22  -2    0.46    0.80
 -15  23   2   14.75    1.89
 -14  23   2    0.97    0.86
 -13  23   2   -0.78    0.60
 -12  23   2   -0.81    0.61
 -11  23   2   11.03    1.56
 -10 -23   2    0.13    0.43
 -10  23   2    0.62    0.71
  -9 -23   2    2.23    0.67
  -9  23   2    1.78    0.84
  -8 -23   2    4.52    0.83
  -8  23   2    4.79    1.10
  -7 -23   2   27.47    1.72
  -7  23   2   30.99    2.13
   6 -23  -2   -0.28    0.52
  -6 -23   2    0.47    0.51
  -6  23   2   -0.20    0.62
  -5 -23   2    4.87    0.86
   5 -23  -2    4.10    0.91
  -5  23   2    4.43    1.00
  -4 -23   2    0.07    0.48
   4 -23  -2    0.32    0.50
  -4  23   2    1.09    0.63
  -3 -23   2   32.04    1.86
   3 -23  -2   30.42    1.96
  -3  23   2   30.11    1.94
   2 -23  -2    0.03    0.49
  -2 -23   2    0.97    0.56
  -2  23   2    1.45    0.65
  -1 -23   2    0.35    0.46
   1 -23  -2    0.04    0.42
   0 -23  -2    0.04    0.40
   0 -23   2    0.16    0.41
   1 -23   2    4.01    0.82
  -1 -23  -2    2.70    0.72
  -2 -23  -2    0.39    0.46
   2 -23   2   -0.08    0.41
  -2  23  -2   -0.37    0.44
  -3 -23  -2    1.20    0.60
   3 -23   2    0.66    0.59
  -3  23  -2    1.16    0.64
   4 -23   2   17.48    1.69
  -4 -23  -2   14.31    1.44
  -4  23  -2   15.82    1.60
  -5 -23  -2    0.62    0.54
   5 -23   2    2.06    0.72
  -5  23  -2    0.76    0.60
   6 -23   2    0.89    0.59
  -6 -23  -2    0.58    0.49
  -6  23  -2    0.66    0.64
  -7  23  -2    6.13    1.12
  -8  23  -2    1.74    0.82
  -9  23  -2    4.30    1.07
 -10  23  -2   30.91    2.22
 -11  23  -2   14.17    1.83
 -12  23  -2    4.63    1.20
 -13  23  -2    2.70    0.96
 -14  23  -2    0.34    0.75
 -15  23  -2    0.48    0.79
 -15  24   2    2.19    0.98
 -14  24   2    7.77    1.44
 -13  24   2   -0.37    0.67
 -12  24   2   -0.16    0.69
 -11  24   2    2.26    0.94
 -10 -24   2   17.64    1.36
 -10  24   2   16.58    1.89
  -9 -24   2    1.89    0.67
  -9  24   2    1.33    0.84
  -8 -24   2    3.35    0.80
  -8  24   2    2.05    0.94
  -7 -24   2   21.80    1.59
  -7  24   2   19.96    2.04
   6 -24  -2   52.88    2.64
  -6 -24   2   47.81    2.33
  -6  24   2   49.90    2.68
   5 -24  -2    9.87    1.31
  -5 -24   2   12.59    1.33
  -5  24   2   11.39    1.46
   4 -24  -2   22.99    1.77
  -4 -24   2   25.93    1.71
  -4  24   2   25.20    1.85
  -3 -24   2    5.92    1.00
   3 -24  -2    5.96    1.10
  -3  24   2    5.90    1.07
  -2 -24   2    1.21    0.61
   2 -24  -2    1.48    0.61
  -2  24   2    0.89    0.67
   1 -24  -2    3.99    0.89
  -1 -24   2    4.14    0.89
   0 -24   2    2.39    0.72
   0 -24  -2    2.41    0.72
  -1 -24  -2    4.84    0.93
   1 -24   2    5.27    1.01
  -2 -24  -2    2.46    0.74
   2 -24   2    1.98    0.73
  -3 -24  -2    1.12    0.54
   3 -24   2    0.65    0.56
  -3  24  -2    0.05    0.56
  -4 -24  -2    1.70    0.61
   4 -24   2    0.66    0.60
  -4  24  -2    0.80    0.62
   5 -24   2   -0.01    0.52
  -5 -24  -2    0.60    0.51
  -5  24  -2    0.04    0.54
   6 -24   2    0.34    0.55
  -6 -24  -2    0.89    0.55
  -6  24  -2    0.29    0.61
  -7  24  -2   -0.30    0.57
  -8  24  -2   -0.86    0.49
  -9  24  -2    6.62    1.29
 -10  24  -2    2.23    0.95
 -11  24  -2   52.21    3.01
 -12  24  -2   22.03    2.23
 -13  24  -2    0.92    0.82
 -14  24  -2   -0.79    0.65
 -15  24  -2    2.78    1.13
 -14  25   2    0.07    0.72
 -13  25   2    0.29    0.77
 -12  25   2   -0.10    0.77
 -11  25   2    0.49    0.76
 -10 -25   2    0.16    0.46
 -10  25   2    1.32    0.84
  -9 -25   2    2.86    0.79
  -9  25   2    2.57    1.00
  -8 -25   2    3.81    0.84
  -8  25   2    2.24    0.99
  -7 -25   2   15.76    1.54
  -7  25   2   16.90    1.88
   6 -25  -2    3.37    0.92
  -6 -25   2    2.42    0.74
  -6  25   2    0.78    0.72
   5 -25  -2   -0.24    0.49
  -5 -25   2    0.34    0.49
  -5  25   2   -0.16    0.57
  -4 -25   2    4.29    0.91
   4 -25  -2    2.64    0.86
  -4  25   2    2.97    0.89
  -3 -25   2    7.29    1.09
   3 -25  -2    8.28    1.29
  -3  25   2    8.32    1.29
   2 -25  -2    2.02    0.75
  -2 -25   2    1.75    0.71
   1 -25  -2    9.08    1.28
  -1 -25   2    8.94    1.26
   0 -25   2   22.57    1.71
   0 -25  -2   21.87    1.71
  -1 -25  -2    3.96    0.95
   1 -25   2    3.21    0.86
   2 -25   2    8.36    1.24
  -2 -25  -2   13.07    1.50
  -3 -25  -2    0.09    0.48
   3 -25   2   -0.34    0.50
  -4 -25  -2    4.66    0.94
   4 -25   2    4.65    1.00
  -4  25  -2    4.30    1.00
  -5 -25  -2    2.43    0.75
   5 -25   2    1.79    0.76
  -5  25  -2    2.53    0.86
   6 -25   2    2.80    0.86
  -6  25  -2    2.65    0.93
  -7  25  -2    2.79    0.88
  -8  25  -2    0.30    0.66
  -9  25  -2    9.65    1.55
 -10  25  -2   47.55    2.88
 -11  25  -2    6.10    1.33
 -12  25  -2   13.16    1.80
 -13  25  -2    0.45    0.80
 -14  25  -2    4.46    1.20
 -14  26   2    2.32    1.01
 -13  26   2    0.42    0.89
 -12  26   2    9.11    1.61
 -11  26   2    3.15    1.11
 -10  26   2    0.20    0.72
  -9 -26   2    0.56    0.53
  -9  26   2   -0.58    0.71
  -8 -26   2   -0.32    0.46
  -8  26   2    0.46    0.78
  -7 -26   2    3.92    0.90
  -7  26   2    3.76    1.08
  -6 -26   2    2.30    0.76
  -6  26   2    0.51    0.69
   5 -26  -2    0.15    0.53
  -5 -26   2   -0.17    0.49
  -5  26   2    0.44    0.67
   4 -26  -2   10.88    1.43
  -4 -26   2   13.94    1.56
  -4  26   2   12.67    1.60
  -3 -26   2   -0.17    0.45
   3 -26  -2    0.39    0.54
  -2 -26   2   -0.13    0.58
   2 -26  -2    0.85    0.63
   1 -26  -2    0.50    0.59
  -1 -26   2   -0.91    0.46
   0 -26  -2   10.52    1.39
   0 -26   2   14.67    1.64
  -1 -26  -2   33.45    2.15
   1 -26   2   40.90    2.35
  -2 -26  -2   14.44    1.60
   2 -26   2   19.37    1.93
  -3 -26  -2    2.82    0.85
   3 -26   2    3.89    1.00
   4 -26   2    7.61    1.27
  -4 -26  -2    7.13    1.13
  -5 -26  -2    6.64    1.07
   5 -26   2    5.29    1.11
  -5  26  -2    4.18    1.01
   6 -26   2   25.71    2.04
  -6  26  -2   26.50    2.06
  -7  26  -2    3.06    1.00
  -8  26  -2    2.96    1.02
  -9  26  -2   12.54    1.73
 -10  26  -2    4.58    1.19
 -11  26  -2   21.72    2.31
 -12  26  -2    0.15    0.80
 -13  26  -2    3.35    1.16
 -13  27   2    0.02    0.85
 -12  27   2    7.34    1.59
 -11  27   2   11.00    1.74
 -10  27   2   -0.54    0.73
  -9 -27   2   -0.16    0.49
  -9  27   2   -0.20    0.69
  -8 -27   2    1.41    0.60
  -8  27   2    0.90    0.75
  -7 -27   2   -0.25    0.49
  -7  27   2    0.37    0.72
  -6 -27   2    4.60    0.95
  -6  27   2    5.99    1.26
  -5 -27   2    3.97    0.96
   5 -27  -2    5.91    1.16
  -5  27   2    5.80    1.20
   4 -27  -2   -0.39    0.51
  -4 -27   2    0.18    0.55
   3 -27  -2    0.62    0.60
  -3 -27   2   -1.29    0.41
   2 -27  -2    6.68    1.19
  -2 -27   2    5.98    1.16
   1 -27  -2    9.47    1.39
  -1 -27   2   10.72    1.50
   0 -27  -2    2.49    0.84
   0 -27   2    3.75    0.98
  -1 -27  -2    9.37    1.36
   1 -27   2    7.24    1.24
   2 -27   2    3.19    1.02
  -2 -27  -2    3.32    0.95
   3 -27   2    1.90    0.79
  -3 -27  -2   -0.38    0.52
   4 -27   2    2.57    0.89
  -4 -27  -2    1.35    0.69
  -5 -27  -2    3.96    0.92
   5 -27   2    3.57    1.02
  -6  27  -2   13.37    1.76
  -7  27  -2   22.20    2.22
  -8  27  -2    0.75    0.80
  -9  27  -2    3.47    1.12
 -10  27  -2    1.95    0.98
 -11  27  -2    0.12    0.81
 -12  27  -2    3.42    1.15
 -13  27  -2   -0.71    0.76
 -13  28   2    0.37    0.94
 -12  28   2    2.22    1.14
 -11  28   2   16.60    2.16
 -10  28   2    4.43    1.27
  -9 -28   2   13.23    1.48
  -9  28   2   12.75    1.80
  -8 -28   2    1.20    0.65
  -8  28   2    1.50    0.96
  -7 -28   2    0.76    0.59
  -7  28   2    0.52    0.82
  -6 -28   2    0.29    0.63
  -6  28   2    1.47    0.86
  -5 -28   2   17.27    1.76
   5 -28  -2   18.61    1.94
  -4 -28   2   -0.34    0.50
   4 -28  -2   -0.07    0.60
  -3 -28   2   -0.13    0.55
   3 -28  -2    0.49    0.62
   2 -28  -2    0.28    0.60
  -2 -28   2   -0.46    0.57
   1 -28  -2   12.77    1.61
  -1 -28   2   11.15    1.53
   0 -28   2   -0.17    0.59
   0 -28  -2   -0.41    0.44
   1 -28   2    2.71    0.92
  -1 -28  -2    4.96    1.10
   2 -28   2    9.39    1.50
  -2 -28  -2    9.92    1.40
  -3 -28  -2    0.10    0.59
   3 -28   2   -0.22    0.60
  -4 -28  -2    0.20    0.55
   4 -28   2   -0.68    0.54
   5 -28   2    3.72    1.07
  -7  28  -2   21.85    2.23
  -8  28  -2    2.44    0.96
  -9  28  -2   -0.81    0.68
 -10  28  -2    1.46    0.97
 -11  28  -2    1.53    0.98
 -12  28  -2    0.11    0.86
 -12  29   2   17.52    2.22
 -11  29   2    0.54    0.98
 -10  29   2    0.50    0.91
  -9 -29   2   -0.18    0.46
  -9  29   2    1.08    0.97
  -8 -29   2    0.33    0.59
  -8  29   2    0.31    0.84
  -7 -29   2   -0.67    0.49
  -7  29   2    0.13    0.79
  -6 -29   2    1.01    0.71
   5 -29  -2    1.07    0.77
  -5 -29   2    0.13    0.65
   4 -29  -2    3.53    1.02
  -4 -29   2    7.98    1.33
  -3 -29   2   -0.58    0.47
   3 -29  -2   -0.18    0.57
  -2 -29   2    0.71    0.67
   2 -29  -2    0.78    0.68
   1 -29  -2   -0.67    0.47
  -1 -29   2   -0.25    0.57
   0 -29   2    0.19    0.63
   0 -29  -2    0.28    0.59
   1 -29   2    1.85    0.86
  -1 -29  -2    4.57    1.05
   2 -29   2    5.20    1.14
  -2 -29  -2    3.82    0.97
   3 -29   2    0.24    0.69
  -3 -29  -2   -0.07    0.55
   4 -29   2    0.63    0.73
  -4 -29  -2   -0.15    0.50
   5 -29   2    0.82    0.81
  -9  29  -2    0.16    0.83
 -10  29  -2   13.31    1.89
 -11  29  -2   -0.21    0.87
 -12  29  -2   -0.65    0.87
 -11  30   2   15.27    2.09
 -10  30   2   -0.55    0.85
  -9  30   2    6.55    1.48
  -8 -30   2    0.95    0.67
  -7 -30   2    1.03    0.75
  -6 -30   2   -0.44    0.62
  -5 -30   2    8.93    1.41
   4 -30  -2    1.21    0.80
  -4 -30   2    2.08    0.84
   3 -30  -2   -0.26    0.61
  -3 -30   2   -0.02    0.59
  -2 -30   2   -0.39    0.55
   2 -30  -2   -0.65    0.52
  -1 -30   2    0.65    0.71
   1 -30  -2    1.38    0.74
   0 -30   2    5.35    1.23
   0 -30  -2    5.47    1.21
  -1 -30  -2    4.93    1.10
   1 -30   2    3.95    1.10
   2 -30   2    1.96    0.90
  -2 -30  -2    1.98    0.91
  -3 -30  -2    3.86    0.98
   3 -30   2    4.64    1.15
   4 -30   2    3.88    1.12
   5 -30   2    8.21    1.45
 -10  30  -2    0.53    0.93
 -11  30  -2    3.33    1.26
 -10  31   2    0.67    1.01
  -8 -31   2    0.90    0.63
  -7 -31   2   -0.12    0.56
  -6 -31   2   -1.03    0.54
  -5 -31   2    2.51    0.94
   4 -31  -2    0.13    0.69
  -4 -31   2   -0.08    0.62
  -3 -31   2   -0.32    0.61
   3 -31  -2   -0.46    0.60
  -2 -31   2   -0.72    0.62
   2 -31  -2   -0.79    0.60
  -1 -31   2    5.82    1.30
   1 -31  -2    5.53    1.25
   0 -31  -2    0.32    0.72
   0 -31   2    1.12    0.83
  -1 -31  -2    3.05    0.99
   1 -31   2    2.93    1.03
  -2 -31  -2   12.81    1.72
   2 -31   2   18.25    2.09
   3 -31   2    0.39    0.77
   4 -31   2    2.43    1.01
  -7 -32   2    0.15    0.60
  -6 -32   2    0.35    0.64
  -5 -32   2    3.26    0.97
   4 -32  -2    2.06    0.91
  -4 -32   2    2.36    0.93
  -3 -32   2    0.16    0.70
   3 -32  -2   -0.45    0.58
  -2 -32   2   -1.69    0.57
   2 -32  -2   -0.79    0.60
   1 -32  -2    1.21    0.92
  -1 -32   2    2.72    1.00
   0 -32   2    5.01    1.24
   0 -32  -2    3.50    1.03
  -1 -32  -2    9.49    1.55
   1 -32   2   11.42    1.72
   2 -32   2   16.20    2.02
   3 -32   2   15.99    2.08
   4 -32   2   -0.51    0.65
  -7 -33   2    2.00    0.86
  -6 -33   2    1.02    0.74
  -5 -33   2   -0.17    0.63
  -4 -33   2    1.37    0.84
   3 -33  -2    0.18    0.68
  -3 -33   2    0.61    0.75
  -2 -33   2   -0.14    0.74
   2 -33  -2    0.38    0.79
  -1 -33   2    0.22    0.74
   1 -33  -2    2.94    1.09
   0 -33   2   10.24    1.66
   0 -33  -2    4.86    1.21
   1 -33   2    4.65    1.26
   2 -33   2   10.27    1.67
   3 -33   2    2.25    1.01
   4 -33   2    2.64    1.07
  -5 -34   2    4.90    1.16
  -4 -34   2   -0.11    0.65
  -3 -34   2    1.49    0.85
  -2 -34   2   -0.44    0.73
  -1 -34   2    1.51    0.94
   0 -34   2   -0.63    0.64
   1 -34   2    2.00    1.00
   2 -34   2    1.43    0.97
   3 -34   2    2.84    1.11
  -2 -35   2    0.52    0.85
  -1 -35   2    0.44    0.78
   0 -35   2    0.17    0.75
   1 -35   2    0.01    0.71
   2 -35   2    0.63    0.85
   3 -35   2    1.87    1.12
 -16   0   3   -0.80    0.28
 -15   0   3    5.91    0.60
 -14   0   3    0.19    0.28
 -13   0   3   39.13    1.35
 -12   0   3   -0.22    0.17
 -11   0   3   90.94    2.26
 -10   0   3   -0.94    0.23
  -9   0   3  170.22    3.61
  -9   0   3  167.32    3.62
  -8   0   3    0.01    0.12
  -8   0   3    0.03    0.12
  -7   0   3   10.70    0.48
  -7   0   3   11.25    0.49
  -6   0   3   -0.03    0.11
  -6   0   3   -0.11    0.11
  -5   0   3   39.14    1.00
  -4   0   3   -0.05    0.11
  -3   0   3   50.25    1.22
  -2   0   3    0.31    0.14
  -1   0   3   28.44    0.85
   0   0   3    0.28    0.14
   1   0   3  143.35    3.08
  -2   0  -3   -0.60    0.16
   2   0   3   -0.37    0.16
  -3   0  -3    1.82    0.26
   3   0   3    1.91    0.26
  -4   0  -3    0.23    0.16
   4   0   3    0.11    0.14
  -5   0  -3   92.31    2.28
  -6   0  -3   -0.06    0.16
  -7   0  -3   64.60    1.85
  -8   0  -3   -0.29    0.24
  -9   0  -3   86.13    2.39
 -10   0  -3   -0.15    0.20
 -11   0  -3    1.20    0.35
 -12   0  -3   -0.21    0.30
 -13   0  -3   26.32    1.34
 -14   0  -3   -0.07    0.31
 -15   0  -3    0.13    0.35
 -16   0  -3    0.18    0.36
 -17   0  -3    7.00    0.86
 -18   0  -3   -0.14    0.38
 -19   0  -3    6.10    0.85
 -17   1   3    0.12    0.35
 -16   1   3    5.29    0.65
 -15  -1   3    2.23    0.38
 -15   1   3    0.67    0.35
 -14  -1   3   33.43    1.18
 -14   1   3   32.03    1.29
 -13  -1   3    1.86    0.34
 -13   1   3    2.45    0.44
 -12  -1   3    6.07    0.50
 -12   1   3    5.42    0.56
 -11  -1   3    6.53    0.52
 -11   1   3    7.39    0.62
 -10  -1   3  200.77    4.20
 -10  -1   3  199.12    4.16
 -10   1   3  201.92    4.38
  -9  -1   3   61.94    1.53
  -9  -1   3   61.42    1.51
  -9   1   3   61.88    1.66
  -9   1   3   62.60    1.68
  -8  -1   3    2.46    0.24
  -8  -1   3    2.89    0.26
  -8   1   3    2.65    0.31
  -8   1   3    2.41    0.30
  -7  -1   3    1.79    0.20
  -7  -1   3    1.90    0.20
  -7   1   3    1.46    0.24
  -7   1   3    1.69    0.24
  -6  -1   3   37.55    0.93
  -6   1   3   37.70    1.06
  -6   1   3   36.87    1.05
  -5  -1   3  134.04    2.72
  -5   1   3  132.54    2.85
  -4  -1   3   20.07    0.59
  -4   1   3   19.82    0.66
  -3  -1   3   79.85    1.73
  -3   1   3   77.02    1.79
  -2  -1   3  110.38    2.40
  -2   1   3  115.21    2.47
  -1  -1   3    9.71    0.45
   1   1  -3   10.23    0.43
  -1   1   3    9.14    0.48
   0  -1   3   11.97    0.51
   0   1  -3   11.54    0.50
   0   1   3   11.95    0.54
   1  -1   3    4.43    0.37
  -1   1  -3    4.28    0.37
   1   1   3    3.92    0.35
   2  -1   3  380.71    7.51
   2   1   3  376.11    7.50
  -2   1  -3  381.06    7.55
   3  -1   3   18.00    0.68
   3   1   3   16.57    0.65
  -3   1  -3   18.36    0.72
   4  -1   3    0.41    0.17
  -4   1  -3    0.20    0.16
   5  -1   3    0.19    0.15
  -5  -1  -3    0.00    0.16
  -5   1  -3    0.28    0.17
  -6  -1  -3   78.80    2.05
  -6   1  -3   79.23    2.11
  -7  -1  -3   38.64    1.32
  -7   1  -3   42.02    1.39
  -8  -1  -3  296.72    6.26
  -8   1  -3  290.63    6.32
  -9  -1  -3   32.33    1.27
  -9   1  -3   32.77    1.32
 -10  -1  -3    8.72    0.67
 -10   1  -3    7.89    0.75
 -11  -1  -3    5.87    0.66
 -11   1  -3    6.48    0.70
 -12  -1  -3    2.05    0.49
 -12   1  -3    2.96    0.56
 -13  -1  -3   39.85    1.63
 -13   1  -3   41.03    1.73
 -14  -1  -3   17.86    1.10
 -14   1  -3   18.19    1.15
 -15  -1  -3    0.01    0.31
 -15   1  -3    0.28    0.36
 -16  -1  -3    0.00    0.35
 -16   1  -3    0.42    0.43
 -17  -1  -3   11.79    1.06
 -17   1  -3   10.03    1.07
 -18  -1  -3    0.13    0.41
 -18   1  -3    0.03    0.42
 -19  -1  -3    0.17    0.43
 -19   1  -3    0.00    0.43
 -18   2   3    2.17    0.53
 -17   2   3    1.00    0.43
 -16   2   3    0.03    0.33
 -15   2   3    2.50    0.51
 -14   2   3   17.03    0.98
 -13   2   3    0.25    0.28
 -12   2   3    2.43    0.42
 -11   2   3   38.47    1.36
 -10  -2   3  197.01    4.04
 -10  -2   3  198.98    4.03
 -10   2   3  196.82    4.39
  -9   2   3   20.81    0.89
  -8  -2   3    4.30    0.28
  -8   2   3    5.16    0.46
  -8   2   3    4.92    0.44
  -7   2   3   27.91    0.95
  -6   2   3   89.41    2.14
  -5   2   3  266.53    5.42
  -4  -2   3   56.21    1.27
  -4  -2   3   57.59    1.25
  -4   2   3   56.15    1.44
  -3  -2   3   16.04    0.53
  -3  -2   3   16.27    0.51
  -3   2   3   16.26    0.62
  -2  -2   3   39.11    1.01
  -2   2   3   39.72    1.10
  -1  -2   3   27.85    0.84
  -1   2   3   28.25    0.92
   1   2  -3   29.72    0.82
   0  -2   3    0.37    0.16
   0   2   3    0.07    0.16
   0   2  -3    0.44    0.16
  -1   2  -3   35.70    1.04
   1   2   3   37.16    1.07
   2  -2   3   11.90    0.55
  -2   2  -3   10.34    0.54
   2   2   3    9.87    0.52
   3  -2   3   25.07    0.87
  -3   2  -3   28.23    0.94
   3   2   3   25.09    0.83
   4  -2   3    7.34    0.47
  -4   2  -3    7.76    0.53
   5  -2   3   43.80    1.27
  -5   2  -3   43.57    1.37
  -6   2  -3    2.31    0.36
  -7  -2  -3   64.25    1.80
  -7   2  -3   61.68    1.86
  -8  -2  -3  183.02    4.13
  -8   2  -3  179.21    4.23
  -9  -2  -3   95.15    2.49
  -9   2  -3   91.39    2.59
 -10  -2  -3    0.11    0.22
 -10   2  -3    0.18    0.27
 -11  -2  -3    0.95    0.34
 -11   2  -3    1.56    0.41
 -12  -2  -3  157.91    3.95
 -12   2  -3  160.74    4.12
 -13  -2  -3   34.33    1.50
 -13   2  -3   33.50    1.59
 -14  -2  -3    7.73    0.81
 -14   2  -3   10.65    1.04
 -15  -2  -3    0.00    0.31
 -15   2  -3   -0.15    0.33
 -16  -2  -3   32.17    1.52
 -16   2  -3   36.20    1.72
 -17  -2  -3    0.33    0.40
 -17   2  -3    1.11    0.52
 -18  -2  -3    3.15    0.61
 -18   2  -3    2.51    0.64
 -19   2  -3    0.33    0.48
 -20   2  -3    0.03    0.48
 -18   3   3    0.55    0.42
 -17   3   3    1.45    0.49
 -16   3   3    1.91    0.50
 -15   3   3    2.42    0.54
 -14   3   3   29.03    1.34
 -13   3   3   22.25    1.14
 -12   3   3    2.15    0.43
 -11   3   3   10.03    0.74
 -10   3   3    7.98    0.69
  -9   3   3  195.82    4.37
  -8   3   3   30.51    1.09
  -7   3   3    8.80    0.56
  -6   3   3  115.23    2.70
  -5   3   3  475.14    9.40
  -4  -3   3  383.72    7.20
  -4  -3   3  367.68    7.21
  -4   3   3  372.48    7.49
  -3  -3   3  159.51    3.38
  -3  -3   3  172.58    3.38
  -3   3   3  169.61    3.59
  -2  -3   3    0.94    0.17
  -2   3   3    0.35    0.17
  -1  -3   3   38.08    1.04
   1   3  -3   39.17    1.02
  -1   3   3   37.81    1.13
   0  -3   3   39.58    1.11
   0   3   3   40.90    1.19
   0   3  -3   40.72    1.11
   1  -3   3  223.24    4.75
   1   3   3  236.16    4.82
  -1   3  -3  237.29    4.80
   2  -3   3   18.86    0.72
  -2   3  -3   18.59    0.74
   2   3   3   15.38    0.67
   3  -3   3   34.99    1.08
  -3   3  -3   33.60    1.11
   3   3   3   34.15    1.02
   4  -3   3   48.33    1.39
  -4   3  -3   48.22    1.46
   5  -3   3   43.65    1.32
  -5   3  -3   45.39    1.43
   6  -3   3   40.99    1.28
  -6   3  -3   42.18    1.41
  -7   3  -3   10.80    0.72
  -8  -3  -3   50.45    1.59
  -8   3  -3   51.95    1.73
  -9  -3  -3   32.73    1.25
  -9   3  -3   35.98    1.41
 -10  -3  -3   32.54    1.26
 -10   3  -3   31.81    1.38
 -11  -3  -3    2.48    0.44
 -11   3  -3    4.92    0.66
 -12  -3  -3    1.34    0.44
 -12   3  -3    1.39    0.49
 -13  -3  -3   95.96    2.77
 -13   3  -3  100.40    3.04
 -14  -3  -3   18.52    1.09
 -14   3  -3   20.26    1.26
 -15  -3  -3    2.30    0.48
 -15   3  -3    2.79    0.64
 -16  -3  -3    7.14    0.82
 -16   3  -3    8.01    0.97
 -17  -3  -3   28.86    1.41
 -17   3  -3   26.90    1.60
 -18  -3  -3    0.70    0.42
 -18   3  -3   -0.03    0.44
 -19   3  -3    1.81    0.64
 -20   3  -3    0.08    0.51
 -19   4   3    1.19    0.52
 -18   4   3    8.88    0.96
 -17   4   3    0.42    0.40
 -16   4   3    5.65    0.77
 -15   4   3   32.27    1.53
 -14   4   3    1.06    0.47
 -13   4   3   56.94    2.00
 -12   4   3    6.11    0.69
 -11   4   3   11.16    0.79
 -10   4   3   57.34    1.82
  -9   4   3   14.78    0.83
  -8   4   3    3.67    0.45
  -7   4   3   38.37    1.28
  -6   4   3   58.15    1.67
  -5   4   3   49.85    1.45
  -4  -4   3    4.56    0.27
  -4  -4   3    4.25    0.28
  -4   4   3    3.96    0.41
  -3  -4   3  228.20    4.59
  -3   4   3  231.46    4.83
  -2  -4   3   21.05    0.69
  -2   4   3   22.24    0.82
  -1  -4   3  114.46    2.57
  -1   4   3  119.11    2.70
   1   4  -3  118.96    2.55
   0  -4   3  278.40    5.71
   0   4   3  281.88    5.81
   0   4  -3  285.71    5.70
   1  -4   3  154.37    3.37
  -1   4  -3  156.11    3.38
   1   4   3  154.13    3.41
   2  -4   3   23.52    0.86
  -2   4  -3   23.96    0.88
   2   4   3   22.65    0.85
   3  -4   3   42.88    1.27
   3   4   3   42.24    1.20
  -3   4  -3   39.44    1.29
   4  -4   3   84.69    2.12
  -4   4  -3   82.05    2.18
   5  -4   3    5.50    0.49
  -5   4  -3    4.38    0.49
   6  -4   3   68.11    1.89
  -6   4  -3   71.53    2.04
   7  -4   3   33.71    1.19
  -7   4  -3   34.29    1.32
  -8   4  -3   23.08    1.10
  -9  -4  -3    9.93    0.68
  -9   4  -3   10.49    0.81
 -10  -4  -3    8.03    0.66
 -10   4  -3    8.00    0.80
 -11  -4  -3    6.26    0.64
 -11   4  -3    6.82    0.78
 -12  -4  -3   46.42    1.67
 -12   4  -3   45.85    1.86
 -13  -4  -3   20.49    1.14
 -13   4  -3   23.89    1.37
 -14  -4  -3    1.58    0.46
 -14   4  -3    1.51    0.52
 -15  -4  -3   -0.34    0.26
 -15   4  -3   -0.16    0.34
 -16  -4  -3   20.95    1.17
 -16   4  -3   21.24    1.42
 -17  -4  -3   18.70    1.14
 -17   4  -3   21.07    1.46
 -18   4  -3    2.10    0.67
 -19   4  -3   -0.59    0.43
 -20   4  -3   -0.07    0.50
 -19   5   3    9.13    1.03
 -18   5   3   10.32    1.11
 -17   5   3    2.53    0.60
 -16   5   3   -0.02    0.41
 -15   5   3   31.75    1.60
 -14   5   3  166.73    4.32
 -13   5   3   10.33    0.96
 -12   5   3    0.10    0.32
 -11   5   3    0.13    0.28
 -10   5   3    3.48    0.51
  -9   5   3   26.74    1.16
  -8   5   3    0.03    0.20
  -7   5   3    0.25    0.21
  -6   5   3   12.17    0.71
  -5  -5   3   10.62    0.40
  -5  -5   3   10.20    0.39
  -5   5   3   10.64    0.64
  -4  -5   3   41.60    1.04
  -4  -5   3   41.39    1.03
  -4   5   3   40.94    1.30
  -3  -5   3   41.32    1.06
  -3   5   3   38.17    1.24
  -2  -5   3    1.59    0.23
  -2   5   3    1.26    0.26
  -1  -5   3   22.32    0.79
  -1   5   3   24.50    0.90
   1   5  -3   23.56    0.78
   0   5   3    6.04    0.48
   0   5  -3    6.04    0.42
   1  -5   3   81.87    2.02
   1   5   3   80.42    2.07
  -1   5  -3   83.17    2.04
   2  -5   3   82.32    2.07
  -2   5  -3   83.33    2.11
   2   5   3   81.64    2.06
   3  -5   3  238.36    4.98
   3   5   3  232.93    4.88
  -3   5  -3  228.37    5.01
   4  -5   3  175.15    3.93
  -4   5  -3  177.54    4.02
   5  -5   3   33.27    1.17
  -5   5  -3   33.22    1.24
   6  -5   3   73.92    2.02
  -6   5  -3   72.03    2.12
   7  -5   3   57.94    1.75
  -7   5  -3   60.38    1.92
   8  -5   3   10.64    0.70
  -8   5  -3   10.20    0.77
  -9   5  -3   -0.18    0.26
 -10  -5  -3    2.45    0.43
 -10   5  -3    2.65    0.53
 -11  -5  -3    7.03    0.68
 -11   5  -3    6.56    0.78
 -12  -5  -3   10.56    0.83
 -12   5  -3   11.74    1.07
 -13  -5  -3    0.83    0.40
 -13   5  -3    1.46    0.51
 -14  -5  -3   11.79    0.86
 -14   5  -3   11.92    1.16
 -15  -5  -3    2.08    0.47
 -15   5  -3    1.80    0.57
 -16  -5  -3   12.25    0.93
 -16   5  -3   10.75    1.16
 -17  -5  -3    0.83    0.45
 -17   5  -3    1.44    0.64
 -18   5  -3   10.42    1.21
 -19   5  -3    4.73    0.89
 -20   5  -3    0.01    0.53
 -19   6   3   -0.63    0.47
 -18   6   3    0.52    0.53
 -17   6   3   -0.12    0.37
 -16   6   3   18.28    1.28
 -15   6   3   37.31    1.78
 -14   6   3    7.21    0.90
 -13   6   3   43.68    1.81
 -12   6   3    6.57    0.78
 -11   6   3    1.99    0.49
 -10   6   3   11.02    0.83
  -9   6   3    6.50    0.68
  -8   6   3    1.94    0.40
  -7   6   3    1.76    0.37
  -6  -6   3    1.28    0.16
  -6  -6   3    1.13    0.16
  -6   6   3    1.20    0.31
  -5  -6   3   22.27    0.67
  -5  -6   3   23.08    0.69
  -5   6   3   22.09    0.96
  -4  -6   3    2.44    0.25
  -4  -6   3    2.76    0.27
  -4   6   3    2.19    0.36
  -3  -6   3    3.45    0.31
   3  -6  -3    1.68    0.30
  -3   6   3    1.93    0.32
  -2  -6   3   15.86    0.65
  -2   6   3   16.16    0.76
  -1  -6   3  251.49    5.35
  -1   6   3  260.16    5.50
   1   6  -3  269.28    5.34
   0  -6   3  133.90    3.03
   0   6   3  135.80    3.14
   0   6  -3  134.68    3.03
   1  -6   3   32.00    1.07
   1   6   3   30.70    1.10
  -1   6  -3   31.85    1.08
   2  -6   3  108.48    2.62
  -2   6  -3  109.10    2.65
   2   6   3  108.61    2.62
   3  -6   3  141.80    3.31
   3   6   3  147.32    3.26
  -3   6  -3  139.35    3.35
   4  -6   3   83.65    2.20
  -4   6  -3   81.52    2.25
   5  -6   3    0.64    0.26
  -5   6  -3    0.66    0.27
   6  -6   3   73.23    2.05
  -6   6  -3   72.23    2.17
   7  -6   3   13.25    0.79
  -7   6  -3   12.62    0.83
   8  -6   3   33.01    1.28
  -8   6  -3   31.88    1.40
  -9   6  -3   -0.21    0.29
 -10   6  -3    3.29    0.61
 -11  -6  -3   15.38    0.89
 -11   6  -3   13.98    1.04
 -12  -6  -3   15.86    0.96
 -12   6  -3   16.92    1.18
 -13  -6  -3    9.18    0.82
 -13   6  -3    9.10    1.01
 -14  -6  -3   -0.25    0.28
 -14   6  -3   -0.26    0.34
 -15  -6  -3    1.30    0.42
 -15   6  -3    1.15    0.53
 -16  -6  -3    0.55    0.35
 -16   6  -3   -0.04    0.43
 -17  -6  -3   36.16    1.52
 -17   6  -3   38.30    2.03
 -18   6  -3   14.95    1.47
 -19   6  -3    0.63    0.56
 -20   6  -3    0.16    0.57
 -20   7   3   11.29    1.23
 -19   7   3   -0.36    0.52
 -18   7   3   -0.03    0.52
 -17   7   3    0.25    0.46
 -16   7   3    0.01    0.43
 -15   7   3   18.41    1.30
 -14   7   3   48.48    2.02
 -13   7   3    0.18    0.34
 -12   7   3    2.21    0.54
 -11   7   3   -0.31    0.26
 -10   7   3    3.55    0.58
  -9   7   3   46.01    1.72
  -8   7   3  158.52    3.94
  -7   7   3    2.42    0.44
  -6  -7   3    0.12    0.11
  -6  -7   3    0.37    0.12
  -6   7   3    0.39    0.24
  -5  -7   3   21.44    0.72
   5  -7  -3   21.98    0.94
  -5  -7   3   21.68    0.71
  -5   7   3   21.92    1.00
   4  -7  -3  158.88    3.70
  -4  -7   3  161.90    3.43
  -4   7   3  164.88    3.80
  -3  -7   3   -0.07    0.12
   3  -7  -3    0.06    0.17
  -3   7   3   -0.08    0.17
  -2  -7   3    1.22    0.24
   2  -7  -3    1.24    0.27
  -2   7   3    1.62    0.32
   2   7  -3    0.99    0.22
   1  -7  -3  249.12    5.44
  -1  -7   3  252.26    5.34
  -1   7   3  259.39    5.51
   1   7  -3  264.89    5.34
   0  -7   3  150.43    3.48
   0  -7  -3  156.11    3.53
   0   7   3  159.27    3.59
   0   7  -3  155.40    3.47
   1  -7   3   10.48    0.61
  -1   7  -3    9.91    0.61
   1   7   3    8.98    0.61
   2  -7   3    0.45    0.22
  -2   7  -3    0.75    0.25
   2   7   3    0.61    0.24
   3  -7   3  149.01    3.46
   3   7   3  144.38    3.36
  -3   7  -3  147.49    3.51
   4  -7   3  113.31    2.80
  -4   7  -3  107.66    2.85
   5  -7   3   29.80    1.16
  -5   7  -3   28.01    1.21
   6  -7   3    3.65    0.48
  -6   7  -3    4.18    0.56
   7  -7   3   27.38    1.18
  -7   7  -3   27.37    1.27
   8  -7   3   41.46    1.50
  -8   7  -3   39.37    1.63
  -9   7  -3    4.15    0.70
 -10   7  -3    0.87    0.44
 -11  -7  -3    4.22    0.57
 -11   7  -3    5.53    0.79
 -12  -7  -3   67.95    2.14
 -12   7  -3   70.79    2.53
 -13  -7  -3   22.70    1.14
 -13   7  -3   26.17    1.51
 -14  -7  -3    0.37    0.32
 -14   7  -3   -0.19    0.37
 -15  -7  -3    6.69    0.72
 -15   7  -3    5.27    0.88
 -16  -7  -3    1.71    0.46
 -16   7  -3    1.66    0.63
 -17   7  -3   12.21    1.36
 -18   7  -3   21.51    1.60
 -19   7  -3   -0.22    0.51
 -20   7  -3    1.81    0.73
 -20   8   3    2.52    0.80
 -19   8   3   14.65    1.46
 -18   8   3    0.64    0.59
 -17   8   3    0.25    0.43
 -16   8   3    1.80    0.59
 -15   8   3   16.02    1.24
 -14   8   3    4.34    0.75
 -13   8   3    0.49    0.41
 -12   8   3   14.62    1.09
 -11   8   3    2.67    0.57
 -10   8   3   50.81    1.95
  -9   8   3  158.43    4.09
  -8   8   3    0.61    0.36
  -7  -8   3   33.73    0.95
  -7  -8   3   31.84    0.93
  -7   8   3   32.79    1.39
  -6  -8   3   13.23    0.55
  -6  -8   3   12.40    0.54
   6  -8  -3   12.68    0.78
  -6   8   3   13.21    0.83
  -5  -8   3   57.56    1.47
   5  -8  -3   56.46    1.75
  -5  -8   3   56.50    1.46
  -5   8   3   56.39    1.83
  -4  -8   3    0.14    0.15
   4  -8  -3    0.11    0.20
  -4   8   3   -0.03    0.21
  -3  -8   3   53.20    1.46
  -3   8   3   52.31    1.67
   2  -8  -3   62.39    1.79
  -2  -8   3   61.30    1.65
  -2   8   3   59.02    1.80
   2   8  -3   57.48    1.57
   1  -8  -3   16.56    0.82
  -1  -8   3   14.19    0.72
  -1   8   3   13.68    0.78
   1   8  -3   13.93    0.70
   0  -8   3  236.47    5.05
   0  -8  -3  239.88    5.09
   0   8   3  223.55    5.09
   0   8  -3  235.53    5.03
   1  -8   3   63.31    1.84
  -1  -8  -3   67.97    1.87
   1   8   3   68.67    1.91
  -1   8  -3   63.83    1.84
   2  -8   3   12.94    0.73
   2   8   3   13.68    0.74
  -2   8  -3   10.87    0.70
   3  -8   3   14.21    0.79
   3   8   3   13.81    0.73
  -3   8  -3   12.03    0.76
   4  -8   3   54.91    1.71
  -4   8  -3   51.36    1.73
   5  -8   3    2.90    0.43
  -5   8  -3    2.83    0.48
   6  -8   3    1.71    0.37
  -6   8  -3    1.59    0.40
   7  -8   3   50.27    1.74
  -7   8  -3   51.38    1.87
   8  -8   3   10.41    0.80
  -8   8  -3   10.59    0.98
  -9   8  -3    3.86    0.67
 -10   8  -3    4.77    0.73
 -11   8  -3   88.75    2.92
 -12  -8  -3   50.81    1.79
 -12   8  -3   48.05    2.10
 -13  -8  -3    1.28    0.41
 -13   8  -3    0.93    0.49
 -14  -8  -3    5.58    0.65
 -14   8  -3    4.34    0.84
 -15  -8  -3    2.07    0.46
 -15   8  -3    0.55    0.52
 -16  -8  -3    1.61    0.44
 -16   8  -3    0.77    0.57
 -17   8  -3   14.30    1.48
 -18   8  -3    1.34    0.66
 -19   8  -3    5.11    0.96
 -20   8  -3    0.41    0.65
 -20   9   3   10.06    1.26
 -19   9   3   24.37    1.71
 -18   9   3    6.46    1.02
 -17   9   3   -0.17    0.44
 -16   9   3    5.43    0.92
 -15   9   3   12.02    1.23
 -14   9   3    0.04    0.40
 -13   9   3    1.73    0.53
 -12   9   3    2.64    0.62
 -11   9   3   11.30    1.06
 -10   9   3    9.87    0.96
  -9   9   3   78.88    2.56
  -8  -9   3  124.78    2.71
  -8  -9   3  124.05    2.70
  -8   9   3  119.09    3.37
  -7  -9   3    2.67    0.31
   7  -9  -3    2.86    0.46
  -7  -9   3    2.76    0.30
  -7   9   3    2.14    0.47
  -6  -9   3    1.11    0.22
   6  -9  -3    1.11    0.31
  -6  -9   3    0.84    0.20
  -6   9   3    0.52    0.30
  -5  -9   3    7.69    0.49
   5  -9  -3    8.32    0.67
  -5   9   3    7.21    0.72
   4  -9  -3   74.74    2.20
  -4  -9   3   78.81    1.98
  -4   9   3   79.65    2.31
  -3  -9   3    0.94    0.25
   3  -9  -3    1.13    0.31
  -3   9   3    0.80    0.28
   2  -9  -3    4.32    0.50
  -2  -9   3    5.36    0.50
   2   9  -3    6.08    0.49
  -2   9   3    5.85    0.59
  -1  -9   3  242.54    5.26
  -1   9   3  237.27    5.39
   1   9  -3  254.06    5.25
   0  -9  -3    3.18    0.44
   0  -9   3    3.10    0.43
   0   9   3    2.81    0.42
   0   9  -3    3.17    0.42
   1  -9   3    8.38    0.63
  -1  -9  -3    8.54    0.63
  -1   9  -3    8.95    0.64
   1   9   3    9.83    0.68
  -2  -9  -3    0.28    0.20
   2  -9   3    0.03    0.20
   2   9   3    0.92    0.29
  -2   9  -3    0.12    0.20
   3  -9   3    5.08    0.56
  -3   9  -3    5.34    0.60
   3   9   3    5.66    0.55
   4  -9   3   58.16    1.85
  -4   9  -3   58.19    1.90
   4   9   3   57.51    1.71
   5  -9   3   29.76    1.25
  -5   9  -3   26.45    1.25
   6  -9   3   12.04    0.84
  -6   9  -3   13.59    0.92
   7  -9   3   71.68    2.24
  -7   9  -3   73.00    2.38
   8  -9   3    5.96    0.68
  -8   9  -3    5.64    0.74
  -9   9  -3    5.15    0.76
 -10   9  -3    9.00    0.97
 -11   9  -3    1.22    0.48
 -12  -9  -3   26.89    1.29
 -12   9  -3   28.98    1.65
 -13  -9  -3    4.49    0.62
 -13   9  -3    4.36    0.81
 -14  -9  -3    0.88    0.36
 -14   9  -3    1.14    0.61
 -15  -9  -3    4.70    0.62
 -15   9  -3    4.95    0.91
 -16  -9  -3    0.23    0.32
 -16   9  -3   -0.53    0.41
 -17   9  -3    0.75    0.63
 -18   9  -3   11.04    1.34
 -19   9  -3    0.48    0.57
 -20  10   3   12.58    1.42
 -19  10   3    8.38    1.23
 -18  10   3    2.46    0.80
 -17  10   3    0.06    0.51
 -16  10   3    4.37    0.86
 -15  10   3    2.06    0.68
 -14  10   3    4.12    0.83
 -13  10   3    0.43    0.46
 -12  10   3   -0.18    0.36
 -11  10   3    2.88    0.65
 -10  10   3    1.79    0.51
  -9 -10   3   44.80    1.27
  -9  10   3   49.35    1.93
  -8 -10   3   24.44    0.89
  -8  10   3   26.76    1.35
  -7 -10   3    1.44    0.27
   7 -10  -3    0.86    0.35
  -7 -10   3    2.08    0.30
  -7  10   3    0.87    0.39
  -6 -10   3    1.01    0.23
   6 -10  -3    0.63    0.29
  -6 -10   3    1.13    0.25
  -6  10   3    0.83    0.33
   5 -10  -3    0.06    0.21
  -5 -10   3    0.19    0.18
  -5  10   3    0.44    0.28
  -4 -10   3   46.03    1.41
  -4  10   3   46.87    1.69
   3 -10  -3    1.42    0.34
  -3 -10   3    1.97    0.33
  -3  10   3    2.60    0.45
   2 -10  -3  111.76    2.94
  -2 -10   3  113.79    2.79
  -2  10   3  113.11    2.98
   2  10  -3  110.40    2.70
   1 -10  -3   80.67    2.27
  -1 -10   3   76.04    2.15
  -1  10   3   80.19    2.30
   1  10  -3   78.29    2.12
   0 -10   3    0.33    0.23
   0 -10  -3    0.73    0.27
   0  10  -3    0.65    0.26
   0  10   3    0.38    0.25
  -1 -10  -3    4.25    0.50
   1 -10   3    4.55    0.51
  -1  10  -3    5.48    0.59
   1  10   3    5.30    0.57
  -2 -10  -3   77.92    2.18
   2 -10   3   78.09    2.24
   2  10   3   75.40    2.20
  -3 -10  -3  161.19    3.81
   3 -10   3  163.79    3.93
  -3  10  -3  157.94    3.96
   3  10   3  162.45    3.83
   4 -10   3   28.92    1.26
  -4  10  -3   27.75    1.26
   4  10   3   26.57    1.11
   5 -10   3   22.85    1.14
  -5  10  -3   24.93    1.23
   6 -10   3   74.43    2.36
  -6  10  -3   80.85    2.51
   7 -10   3   25.26    1.25
  -7  10  -3   24.32    1.32
   8 -10   3   30.60    1.42
  -8  10  -3   32.41    1.55
  -9  10  -3    1.35    0.46
 -10  10  -3    0.49    0.42
 -11  10  -3   19.05    1.34
 -12  10  -3    3.52    0.74
 -13 -10  -3    0.81    0.38
 -13  10  -3    0.99    0.54
 -14 -10  -3    2.20    0.47
 -14  10  -3    1.38    0.66
 -15 -10  -3    0.30    0.34
 -15  10  -3    0.22    0.49
 -16 -10  -3    3.98    0.59
 -16  10  -3    1.37    0.65
 -17  10  -3    0.61    0.60
 -18  10  -3    3.15    0.88
 -19  10  -3    5.64    1.04
 -20  11   3    0.48    0.65
 -19  11   3   21.71    1.69
 -18  11   3    5.65    1.01
 -17  11   3    3.96    0.87
 -16  11   3    8.56    1.16
 -15  11   3   26.50    1.71
 -14  11   3    0.14    0.48
 -13  11   3    6.28    0.91
 -12  11   3   16.73    1.30
 -11  11   3    3.00    0.69
 -10  11   3    7.32    0.90
  -9  11   3   27.61    1.46
  -8 -11   3    2.23    0.34
  -8  11   3    2.52    0.54
  -7 -11   3    2.52    0.35
   7 -11  -3    2.23    0.46
  -7  11   3    2.41    0.52
  -6 -11   3    2.25    0.35
   6 -11  -3    2.07    0.42
  -6  11   3    1.77    0.45
  -5 -11   3   66.40    1.85
   5 -11  -3   65.61    2.11
  -5  11   3   63.31    2.18
  -4 -11   3  106.18    2.66
   4 -11  -3  108.80    2.94
  -4  11   3  101.77    2.96
   3 -11  -3   16.76    0.97
  -3 -11   3   16.53    0.84
  -3  11   3   15.77    0.97
  -2 -11   3   47.75    1.58
   2 -11  -3   48.98    1.72
  -2  11   3   50.92    1.76
   2  11  -3   49.30    1.54
  -1 -11   3   32.03    1.26
   1 -11  -3   30.20    1.30
  -1  11   3   30.10    1.31
   1  11  -3   32.17    1.23
   0 -11   3  127.98    3.31
   0 -11  -3  137.22    3.40
   0  11  -3  132.60    3.30
   0  11   3  135.35    3.41
   1 -11   3   28.42    1.21
   1  11   3   28.51    1.23
  -1  11  -3   29.31    1.22
  -2 -11  -3   19.38    0.98
   2 -11   3   19.07    1.00
  -2  11  -3   19.81    1.03
   2  11   3   18.14    0.98
   3 -11   3   29.83    1.31
  -3 -11  -3   30.61    1.26
  -3  11  -3   31.46    1.37
   3  11   3   31.07    1.27
   4 -11   3  161.21    4.01
   4  11   3  158.29    3.79
  -4  11  -3  159.44    4.09
   5 -11   3   28.04    1.31
  -5  11  -3   24.06    1.29
   6 -11   3   28.25    1.35
  -6  11  -3   27.42    1.41
   7 -11   3  240.39    5.66
  -7  11  -3  239.76    5.86
   8 -11   3   67.53    2.30
  -8  11  -3   69.93    2.51
  -9  11  -3    1.43    0.48
 -10  11  -3    4.70    0.79
 -11  11  -3    0.02    0.37
 -12  11  -3    0.05    0.45
 -13 -11  -3    0.04    0.30
 -13  11  -3    0.21    0.49
 -14 -11  -3    3.79    0.60
 -14  11  -3    3.41    0.84
 -15 -11  -3    0.25    0.33
 -15  11  -3    0.10    0.49
 -16 -11  -3    0.64    0.37
 -16  11  -3    0.82    0.59
 -17  11  -3    0.52    0.58
 -18  11  -3    0.56    0.64
 -19  11  -3    0.02    0.61
 -19  12   3    0.94    0.71
 -18  12   3    0.02    0.58
 -17  12   3   -0.47    0.47
 -16  12   3    0.17    0.54
 -15  12   3    0.89    0.61
 -14  12   3    0.78    0.57
 -13  12   3    3.15    0.75
 -12  12   3    8.56    1.08
 -11  12   3   -0.24    0.44
 -10 -12   3    0.21    0.21
 -10  12   3    0.09    0.36
  -9 -12   3    5.20    0.49
  -9  12   3    5.26    0.78
  -8 -12   3   39.56    1.31
  -8  12   3   39.91    1.81
   7 -12  -3    3.68    0.59
  -7 -12   3    2.88    0.41
  -7  12   3    2.61    0.55
   6 -12  -3   34.78    1.53
  -6 -12   3   34.13    1.26
  -6  12   3   37.29    1.64
   5 -12  -3   86.06    2.61
  -5 -12   3   83.95    2.31
  -5  12   3   86.33    2.70
  -4 -12   3  207.99    4.57
   4 -12  -3  189.82    4.80
  -4  12   3  202.97    4.93
   3 -12  -3  104.47    2.94
  -3 -12   3  106.37    2.76
  -3  12   3  104.72    3.00
   3  12  -3  105.08    2.64
  -2 -12   3    1.49    0.35
   2 -12  -3    1.19    0.36
   2  12  -3    1.49    0.33
  -2  12   3    1.03    0.35
   1 -12  -3  137.06    3.57
  -1 -12   3  136.76    3.48
  -1  12   3  137.73    3.60
   1  12  -3  146.33    3.45
   0 -12   3   48.53    1.70
   0 -12  -3   47.31    1.74
   0  12  -3   50.63    1.69
   0  12   3   50.57    1.77
  -1 -12  -3   44.84    1.64
   1 -12   3   46.83    1.65
  -1  12  -3   43.08    1.60
   1  12   3   43.45    1.62
  -2 -12  -3    1.04    0.31
   2 -12   3    1.32    0.37
  -2  12  -3    1.39    0.36
   2  12   3    1.41    0.37
   3 -12   3   72.01    2.31
  -3 -12  -3   74.81    2.24
   3  12   3   76.11    2.25
  -3  12  -3   74.57    2.37
  -4 -12  -3   41.01    1.52
   4 -12   3   38.87    1.61
  -4  12  -3   39.35    1.65
   4  12   3   36.68    1.44
   5 -12   3   31.97    1.46
  -5  12  -3   31.89    1.52
   6 -12   3   27.28    1.38
  -6  12  -3   29.92    1.52
   7 -12   3  145.40    3.91
  -7  12  -3  149.16    4.15
   8 -12   3   71.68    2.43
  -8  12  -3   70.56    2.60
  -9  12  -3    2.86    0.66
 -10  12  -3    5.35    0.84
 -11  12  -3   11.42    1.23
 -12  12  -3    0.59    0.52
 -13  12  -3   12.95    1.40
 -14 -12  -3    1.75    0.48
 -14  12  -3    0.28    0.55
 -15 -12  -3    0.50    0.36
 -15  12  -3    0.48    0.57
 -16  12  -3    1.17    0.68
 -17  12  -3    0.33    0.56
 -18  12  -3    0.01    0.57
 -19  12  -3   -0.46    0.57
 -19  13   3    0.72    0.66
 -18  13   3    0.22    0.58
 -17  13   3    0.39    0.59
 -16  13   3    0.94    0.59
 -15  13   3   -0.27    0.49
 -14  13   3    1.59    0.66
 -13  13   3   -0.19    0.45
 -12  13   3    0.73    0.52
 -11  13   3   12.99    1.30
 -10 -13   3   22.10    0.96
 -10  13   3   23.23    1.47
  -9 -13   3   10.08    0.67
  -9  13   3   11.22    1.17
  -8 -13   3   32.25    1.20
  -8  13   3   31.88    1.65
  -7 -13   3    3.23    0.45
   7 -13  -3    2.71    0.55
  -7  13   3    1.61    0.52
  -6 -13   3   48.22    1.63
   6 -13  -3   49.11    1.91
  -6  13   3   47.87    1.99
  -5 -13   3  142.49    3.56
   5 -13  -3  145.58    3.88
  -5  13   3  149.17    4.01
   4 -13  -3  242.13    5.65
  -4 -13   3  234.40    5.34
  -4  13   3  235.97    5.70
  -3 -13   3   40.48    1.53
   3 -13  -3   41.53    1.67
   3  13  -3   42.50    1.44
  -3  13   3   42.27    1.73
   2 -13  -3    0.82    0.33
  -2 -13   3    1.06    0.33
   2  13  -3    1.25    0.32
  -2  13   3    1.01    0.36
   1 -13  -3   11.98    0.87
  -1 -13   3   10.92    0.80
  -1  13   3   11.10    0.84
   1  13  -3   10.21    0.75
   0 -13  -3   39.96    1.56
   0 -13   3   35.75    1.47
   0  13  -3   34.56    1.43
   0  13   3   34.47    1.48
   1 -13   3    4.89    0.63
  -1 -13  -3    5.60    0.65
  -1  13  -3    3.53    0.53
   1  13   3    2.80    0.51
  -2 -13  -3    8.04    0.78
   2 -13   3   10.28    0.81
   2  13   3    9.22    0.84
  -2  13  -3    8.42    0.82
   3 -13   3   37.27    1.59
  -3 -13  -3   38.75    1.52
   3  13   3   36.95    1.49
  -3  13  -3   40.49    1.65
  -4 -13  -3   18.80    1.05
   4 -13   3   19.11    1.15
   4  13   3   18.76    1.03
  -4  13  -3   20.55    1.20
   5 -13   3    6.49    0.77
  -5  13  -3    6.02    0.78
   6 -13   3   36.03    1.64
  -6  13  -3   38.92    1.78
   7 -13   3   33.63    1.60
  -7  13  -3   31.94    1.70
   8 -13   3   18.52    1.22
  -8  13  -3   16.48    1.26
  -9  13  -3    2.07    0.60
 -10  13  -3    2.08    0.63
 -11  13  -3   13.76    1.41
 -12  13  -3    4.94    0.94
 -13  13  -3    1.12    0.64
 -14 -13  -3   13.43    0.99
 -14  13  -3   14.04    1.52
 -15 -13  -3    6.39    0.75
 -15  13  -3    7.42    1.16
 -16  13  -3    4.17    0.95
 -17  13  -3    0.04    0.56
 -18  13  -3    5.59    1.12
 -19  13  -3    1.26    0.80
 -19  14   3    1.82    0.83
 -17  14   3    0.33    0.61
 -16  14   3   -0.60    0.51
 -15  14   3    0.37    0.57
 -14  14   3   -0.14    0.47
 -13  14   3    0.52    0.51
 -12  14   3    1.79    0.62
 -11 -14   3   19.41    0.93
 -11  14   3   20.52    1.48
 -10 -14   3   10.07    0.74
 -10  14   3   11.85    1.28
  -9 -14   3    2.13    0.39
  -9  14   3    2.72    0.67
  -8 -14   3    3.20    0.47
  -8  14   3    1.47    0.53
  -7 -14   3   25.93    1.14
   7 -14  -3   24.99    1.41
  -7  14   3   25.89    1.50
   6 -14  -3   24.55    1.40
  -6 -14   3   23.66    1.15
  -6  14   3   24.46    1.44
  -5 -14   3    0.82    0.38
   5 -14  -3    0.60    0.42
  -5  14   3    1.94    0.55
  -4 -14   3   35.14    1.43
   4 -14  -3   35.13    1.60
  -4  14   3   32.04    1.61
  -3 -14   3   25.69    1.21
   3 -14  -3   26.51    1.35
   3  14  -3   24.71    1.11
  -3  14   3   22.23    1.29
   2 -14  -3   32.77    1.54
  -2 -14   3   35.54    1.47
  -2  14   3   36.63    1.60
   2  14  -3   36.53    1.40
  -1 -14   3   25.07    1.25
   1 -14  -3   28.63    1.39
   1  14  -3   28.49    1.27
  -1  14   3   27.78    1.36
   0 -14   3   12.89    0.92
   0 -14  -3   13.59    0.95
   0  14  -3   13.48    0.89
   0  14   3   14.71    0.98
  -1 -14  -3   42.91    1.70
   1 -14   3   41.42    1.68
   1  14   3   39.31    1.63
  -1  14  -3   43.01    1.68
  -2 -14  -3   57.89    2.03
   2 -14   3   54.89    2.04
  -2  14  -3   59.33    2.08
   2  14   3   57.96    2.01
  -3 -14  -3   46.10    1.76
   3 -14   3   47.55    1.87
  -3  14  -3   43.83    1.84
   3  14   3   49.89    1.79
   4 -14   3    6.25    0.76
  -4 -14  -3    7.59    0.78
  -4  14  -3    7.64    0.89
   5 -14   3    1.17    0.42
  -5  14  -3    0.64    0.40
   6 -14   3    5.70    0.79
  -6  14  -3    5.11    0.81
   7 -14   3   41.51    1.82
  -7  14  -3   41.22    1.95
  -8  14  -3   15.17    1.23
  -9  14  -3   30.55    1.76
 -10  14  -3   -0.14    0.38
 -11  14  -3   17.61    1.43
 -12  14  -3    2.02    0.71
 -13  14  -3   17.95    1.71
 -14  14  -3    4.20    0.93
 -15 -14  -3    1.58    0.50
 -15  14  -3    1.74    0.74
 -16  14  -3   -0.10    0.57
 -17  14  -3    0.57    0.66
 -18  14  -3    4.63    1.08
 -19  15   3    0.34    0.68
 -18  15   3    1.85    0.80
 -17  15   3   11.54    1.54
 -16  15   3   -0.76    0.54
 -15  15   3   11.62    1.46
 -14  15   3    2.74    0.80
 -13  15   3   11.06    1.36
 -12  15   3    0.34    0.51
 -11 -15   3   24.15    1.09
 -11  15   3   22.85    1.62
 -10 -15   3    7.81    0.71
 -10  15   3    6.81    1.04
  -9 -15   3    0.12    0.25
  -9  15   3   -0.15    0.38
  -8 -15   3    0.65    0.30
  -8  15   3    0.27    0.37
   7 -15  -3    1.91    0.54
  -7 -15   3    1.71    0.42
  -7  15   3    1.67    0.58
   6 -15  -3   39.65    1.84
  -6 -15   3   42.04    1.62
  -6  15   3   48.78    2.08
   5 -15  -3   27.26    1.48
  -5 -15   3   29.98    1.34
  -5  15   3   28.24    1.54
  -4 -15   3   15.98    1.00
   4 -15  -3   17.64    1.16
  -4  15   3   17.35    1.19
  -3 -15   3   18.19    1.06
   3 -15  -3   17.34    1.14
  -3  15   3   17.70    1.18
  -2 -15   3   27.40    1.33
   2 -15  -3   26.00    1.40
  -2  15   3   28.79    1.44
   2  15  -3   25.53    1.22
   1 -15  -3    4.56    0.67
  -1 -15   3    5.98    0.72
  -1  15   3    6.13    0.77
   1  15  -3    5.39    0.66
   0 -15   3   73.02    2.40
   0 -15  -3   70.43    2.38
   0  15   3   72.28    2.41
   0  15  -3   69.87    2.31
  -1 -15  -3    8.80    0.94
   1 -15   3    9.35    0.96
   1  15   3   10.03    0.96
  -1  15  -3    9.06    0.91
   2 -15   3  207.42    5.23
  -2 -15  -3  210.31    5.16
   2  15   3  216.46    5.16
  -2  15  -3  210.79    5.20
   3 -15   3   98.09    3.01
  -3 -15  -3   97.18    2.89
   3  15   3   93.76    2.83
  -3  15  -3   96.12    3.00
   4 -15   3   59.97    2.22
  -4 -15  -3   62.19    2.15
  -4  15  -3   58.84    2.26
   5 -15   3   30.50    1.56
  -5  15  -3   31.32    1.63
   6 -15   3    0.65    0.38
  -6  15  -3    0.89    0.45
   7 -15   3    0.27    0.35
  -7  15  -3    0.27    0.39
  -8  15  -3    0.71    0.49
  -9  15  -3   37.30    2.00
 -10  15  -3    4.45    0.87
 -11  15  -3    4.95    0.96
 -12  15  -3   -0.35    0.43
 -13  15  -3    0.18    0.51
 -14  15  -3    2.31    0.79
 -15 -15  -3   -0.25    0.34
 -15  15  -3    0.36    0.58
 -16  15  -3    0.09    0.56
 -17  15  -3    0.19    0.61
 -18  15  -3    0.56    0.73
 -18  16   3    4.35    1.10
 -17  16   3    1.30    0.82
 -16  16   3   -0.35    0.64
 -15  16   3   -0.33    0.56
 -14  16   3    0.38    0.58
 -13  16   3    4.99    1.02
 -12  16   3    0.89    0.57
 -11 -16   3    0.02    0.29
 -11  16   3   -0.70    0.40
 -10 -16   3   10.58    0.87
 -10  16   3    9.44    1.21
  -9 -16   3    3.48    0.54
  -9  16   3    4.15    0.86
  -8 -16   3    2.33    0.45
  -8  16   3    1.18    0.55
   7 -16  -3    1.91    0.53
  -7 -16   3    0.76    0.33
  -7  16   3    0.85    0.47
   6 -16  -3   15.15    1.17
  -6 -16   3   13.80    0.94
  -6  16   3   13.06    1.27
   5 -16  -3    9.74    1.06
  -5 -16   3    7.23    0.79
  -5  16   3    9.79    1.10
  -4 -16   3    5.53    0.70
   4 -16  -3    5.64    0.78
  -4  16   3    6.80    0.91
   3 -16  -3    0.88    0.40
  -3 -16   3    0.07    0.27
  -3  16   3   -0.15    0.29
  -2 -16   3   19.90    1.18
   2 -16  -3   19.40    1.25
  -2  16   3   22.34    1.31
   2  16  -3   19.83    1.11
  -1 -16   3   47.95    1.90
   1 -16  -3   46.55    1.92
  -1  16   3   46.31    1.93
   1  16  -3   48.76    1.81
   0 -16  -3   71.99    2.44
   0 -16   3   65.48    2.36
   0  16   3   69.16    2.41
   0  16  -3   63.56    2.28
   1 -16   3  286.24    6.66
  -1 -16  -3  277.76    6.60
  -1  16  -3  282.84    6.57
   1  16   3  277.91    6.56
   2 -16   3   57.42    2.18
  -2 -16  -3   55.29    2.12
  -2  16  -3   55.33    2.16
   2  16   3   51.70    2.05
  -3 -16  -3  158.73    4.19
  -3  16  -3  157.15    4.31
  -4 -16  -3    1.22    0.44
   4 -16   3    1.34    0.47
  -4  16  -3    1.09    0.45
   5 -16   3   14.07    1.14
  -5 -16  -3   17.90    1.13
  -5  16  -3   14.62    1.17
   6 -16   3   -0.20    0.29
  -6  16  -3    0.33    0.39
   7 -16   3    0.32    0.42
  -7  16  -3    0.97    0.51
  -8  16  -3   25.47    1.67
  -9  16  -3    0.93    0.60
 -10  16  -3    7.19    1.10
 -11  16  -3   -0.34    0.45
 -12  16  -3    0.08    0.51
 -13  16  -3    0.60    0.57
 -14  16  -3    0.11    0.55
 -15 -16  -3   -0.24    0.35
 -15  16  -3    1.03    0.67
 -16  16  -3    2.22    0.83
 -17  16  -3    0.74    0.72
 -18  16  -3    3.30    1.04
 -18  17   3    4.91    1.16
 -17  17   3   17.11    1.87
 -16  17   3    0.00    0.64
 -15  17   3    5.17    1.04
 -14  17   3    1.41    0.72
 -13  17   3    9.37    1.33
 -12  17   3    0.60    0.59
 -11 -17   3    6.21    0.69
 -11  17   3    6.93    1.09
 -10 -17   3    5.81    0.72
 -10  17   3    4.60    0.93
  -9 -17   3    2.40    0.50
  -9  17   3    2.91    0.79
  -8 -17   3   11.04    0.97
  -8  17   3   13.66    1.43
  -7 -17   3    0.13    0.30
   7 -17  -3    0.79    0.42
  -7  17   3    0.25    0.42
  -6 -17   3   24.64    1.27
   6 -17  -3   24.82    1.50
  -6  17   3   23.82    1.52
  -5 -17   3   16.82    1.06
   5 -17  -3   16.23    1.26
  -5  17   3   18.08    1.31
  -4 -17   3    3.22    0.58
   4 -17  -3    3.80    0.69
  -4  17   3    4.81    0.83
  -3 -17   3    1.03    0.39
   3 -17  -3    0.29    0.37
  -3  17   3    0.95    0.49
   2 -17  -3   15.91    1.18
  -2 -17   3   16.50    1.10
  -2  17   3   16.75    1.21
   1 -17  -3   19.28    1.28
  -1 -17   3   20.80    1.25
  -1  17   3   18.55    1.26
   1  17  -3   19.83    1.18
   0 -17  -3  117.35    3.46
   0 -17   3  106.70    3.32
   0  17  -3  109.36    3.27
   0  17   3  114.86    3.41
   1 -17   3   35.59    1.74
  -1 -17  -3   33.84    1.73
   1  17   3   34.53    1.68
  -1  17  -3   35.59    1.71
  -2 -17  -3  184.25    4.80
   2 -17   3  187.57    4.88
   2  17   3  182.99    4.74
  -2  17  -3  177.73    4.78
   3 -17   3   32.14    1.64
  -3 -17  -3   30.96    1.58
  -3  17  -3   34.47    1.72
  -4 -17  -3   22.77    1.33
   4 -17   3   23.20    1.41
  -4  17  -3   21.76    1.41
   5 -17   3   26.17    1.51
  -5 -17  -3   22.00    1.32
  -5  17  -3   24.52    1.51
   6 -17   3    0.33    0.40
  -6  17  -3   -0.05    0.36
   7 -17   3   -0.12    0.40
  -7  17  -3   -0.14    0.42
  -8  17  -3   -0.57    0.42
  -9  17  -3   65.70    2.83
 -10  17  -3   -0.26    0.50
 -11  17  -3    0.17    0.57
 -12  17  -3    1.79    0.70
 -13  17  -3    3.23    0.92
 -14  17  -3    7.45    1.24
 -15  17  -3    0.17    0.59
 -16  17  -3    8.97    1.41
 -17  17  -3   -0.42    0.62
 -18  18   3    2.70    0.95
 -17  18   3    2.53    0.93
 -16  18   3    0.50    0.71
 -15  18   3    0.29    0.59
 -14  18   3    0.49    0.63
 -13  18   3    6.65    1.13
 -12  18   3    0.41    0.55
 -11 -18   3   31.83    1.45
 -11  18   3   34.20    2.10
 -10 -18   3   -0.68    0.35
 -10  18   3    0.23    0.55
  -9 -18   3    0.72    0.43
  -9  18   3    0.90    0.62
  -8 -18   3   -0.12    0.32
  -8  18   3   -0.52    0.42
   7 -18  -3   25.43    1.60
  -7  18   3   28.00    1.75
  -6 -18   3    4.09    0.68
   6 -18  -3    4.27    0.82
  -6  18   3    6.22    1.00
  -5 -18   3   12.16    0.98
   5 -18  -3   12.31    1.27
  -5  18   3   12.08    1.29
  -4 -18   3    5.69    0.76
   4 -18  -3    5.12    0.84
  -4  18   3    6.42    0.96
   3 -18  -3   38.90    1.90
  -3 -18   3   37.46    1.72
  -3  18   3   38.62    1.91
   2 -18  -3   32.75    1.74
  -2 -18   3   38.86    1.75
  -2  18   3   35.25    1.80
   1 -18  -3    6.44    0.90
  -1 -18   3    6.53    0.87
  -1  18   3    5.84    0.85
   1  18  -3    6.23    0.79
   0 -18   3   43.82    1.94
   0 -18  -3   43.97    1.99
   0  18   3   47.10    2.00
   0  18  -3   40.37    1.81
   1 -18   3  102.53    3.27
  -1 -18  -3  108.54    3.32
  -1  18  -3   98.53    3.21
   1  18   3  103.65    3.24
   2 -18   3    0.34    0.37
  -2 -18  -3   -0.21    0.32
  -2  18  -3    0.41    0.42
   3 -18   3   33.05    1.72
  -3 -18  -3   33.40    1.65
  -3  18  -3   32.60    1.70
   4 -18   3    0.94    0.46
  -4 -18  -3    1.38    0.46
  -4  18  -3    2.36    0.60
  -5 -18  -3   10.79    1.08
   5 -18   3   10.62    1.15
  -5  18  -3   14.19    1.39
   6 -18   3    5.57    0.88
  -6  18  -3    6.06    0.98
   7 -18   3    1.86    0.64
  -7  18  -3    3.44    0.82
  -8  18  -3   10.74    1.30
  -9  18  -3   30.31    1.91
 -10  18  -3    2.08    0.72
 -11  18  -3    5.35    1.07
 -12  18  -3    1.57    0.74
 -13  18  -3   20.42    1.96
 -14  18  -3    0.39    0.67
 -15  18  -3    4.36    1.08
 -16  18  -3   -0.48    0.61
 -17  18  -3    1.45    0.85
 -17  19   3   -0.76    0.59
 -16  19   3   -0.48    0.54
 -15  19   3    0.30    0.64
 -14  19   3   -0.87    0.51
 -13  19   3    7.15    1.21
 -12  19   3    0.62    0.61
 -11 -19   3    0.97    0.43
 -11  19   3    0.73    0.61
 -10 -19   3   42.41    1.82
 -10  19   3   41.15    2.33
  -9 -19   3   -0.13    0.36
  -9  19   3    0.86    0.63
  -8 -19   3    0.87    0.46
  -8  19   3    2.41    0.75
  -7 -19   3    0.08    0.37
   7 -19  -3    0.22    0.48
  -7  19   3    0.42    0.51
  -6 -19   3   73.83    2.56
   6 -19  -3   77.40    2.90
  -6  19   3   73.55    2.97
   5 -19  -3    0.53    0.45
  -5 -19   3    0.11    0.33
  -5  19   3   -0.39    0.42
   4 -19  -3    3.24    0.73
  -4 -19   3    2.59    0.57
  -4  19   3    2.37    0.65
  -3 -19   3   45.09    1.99
   3 -19  -3   47.00    2.17
  -3  19   3   50.66    2.26
   2 -19  -3  160.28    4.52
  -2 -19   3  155.37    4.33
  -2  19   3  148.17    4.44
  -1 -19   3   61.62    2.37
   1 -19  -3   60.77    2.44
  -1  19   3   58.00    2.39
   0 -19   3   15.62    1.21
   0 -19  -3   15.24    1.21
   0  19   3   14.57    1.17
   0  19  -3   15.60    1.15
  -1 -19  -3    5.00    0.79
   1 -19   3    5.89    0.86
   1  19   3    7.10    0.93
  -1  19  -3    4.23    0.72
   2 -19   3    3.47    0.72
  -2 -19  -3    3.22    0.67
  -2  19  -3    3.51    0.70
   3 -19   3    0.00    0.36
  -3 -19  -3    0.29    0.34
  -3  19  -3    0.17    0.38
   4 -19   3    3.96    0.78
  -4 -19  -3    3.44    0.67
  -4  19  -3    2.98    0.70
  -5 -19  -3   44.44    2.01
   5 -19   3   42.34    2.07
  -5  19  -3   43.93    2.17
   6 -19   3   10.19    1.20
  -6  19  -3   10.95    1.30
   7 -19   3    1.84    0.63
  -7  19  -3    0.90    0.60
  -8  19  -3    1.66    0.68
  -9  19  -3    2.02    0.74
 -10  19  -3    4.69    1.00
 -11  19  -3   -0.50    0.50
 -12  19  -3    0.57    0.62
 -13  19  -3    0.81    0.74
 -14  19  -3    9.54    1.47
 -15  19  -3    6.71    1.29
 -16  19  -3   12.02    1.70
 -17  19  -3   -0.82    0.67
 -17  20   3    0.51    0.76
 -16  20   3   -0.69    0.61
 -15  20   3    0.68    0.75
 -14  20   3    0.90    0.76
 -13  20   3    1.13    0.82
 -12  20   3   11.74    1.56
 -11 -20   3    8.27    0.90
 -11  20   3    5.75    1.13
 -10 -20   3    0.30    0.41
 -10  20   3    0.72    0.63
  -9 -20   3    1.49    0.53
  -9  20   3    1.66    0.72
  -8 -20   3    0.39    0.40
  -8  20   3   -0.57    0.43
  -7 -20   3    3.09    0.65
  -7  20   3    2.82    0.76
  -6 -20   3   -0.46    0.29
   6 -20  -3    0.48    0.48
  -6  20   3   -0.31    0.45
   5 -20  -3    7.25    1.02
  -5 -20   3    7.97    0.96
  -5  20   3    9.49    1.22
  -4 -20   3    3.07    0.66
   4 -20  -3    5.26    0.92
  -4  20   3    4.49    0.90
  -3 -20   3   71.48    2.63
   3 -20  -3   65.53    2.71
  -3  20   3   72.57    2.85
  -2 -20   3  110.80    3.50
   2 -20  -3  102.12    3.56
  -2  20   3  110.21    3.63
  -1 -20   3    6.06    0.87
   1 -20  -3    8.54    1.10
  -1  20   3    7.16    1.00
   0 -20  -3    0.90    0.49
   0 -20   3    0.99    0.48
   0  20   3    1.74    0.55
   0  20  -3    0.07    0.39
   1 -20   3    0.34    0.44
  -1 -20  -3    0.53    0.44
  -1  20  -3    0.37    0.44
  -2 -20  -3   11.94    1.23
   2 -20   3   10.19    1.14
  -2  20  -3    9.45    1.11
   3 -20   3    0.35    0.43
  -3 -20  -3    0.26    0.39
  -3  20  -3    0.29    0.47
  -4 -20  -3   56.91    2.40
   4 -20   3   63.88    2.58
  -4  20  -3   62.17    2.62
  -5 -20  -3   36.13    1.93
   5 -20   3   41.74    2.13
  -5  20  -3   39.48    2.14
   6 -20   3   34.74    1.94
  -6  20  -3   29.03    1.89
   7 -20   3    5.17    0.93
  -7  20  -3    4.64    0.93
  -8  20  -3    2.90    0.81
  -9  20  -3    4.87    1.01
 -10  20  -3    4.74    1.03
 -11  20  -3    0.70    0.62
 -12  20  -3   -0.25    0.55
 -13  20  -3   11.18    1.59
 -14  20  -3    1.76    0.92
 -15  20  -3    2.91    1.09
 -16  20  -3    8.76    1.49
 -16  21   3    5.55    1.22
 -15  21   3    1.56    0.85
 -14  21   3    1.32    0.80
 -13  21   3   23.76    2.21
 -12  21   3    5.91    1.22
 -11 -21   3    0.76    0.39
 -11  21   3   -0.12    0.58
 -10 -21   3    4.75    0.76
 -10  21   3    4.36    1.02
  -9 -21   3   -0.07    0.34
  -9  21   3   -0.47    0.48
  -8 -21   3    2.53    0.62
  -8  21   3    3.41    0.89
  -7 -21   3    0.01    0.36
  -7  21   3    1.45    0.67
   6 -21  -3    0.63    0.50
  -6 -21   3    0.60    0.41
  -6  21   3   -0.23    0.47
   5 -21  -3    1.00    0.54
  -5 -21   3    0.39    0.39
  -5  21   3    2.01    0.73
  -4 -21   3    8.19    1.02
   4 -21  -3   10.99    1.29
  -4  21   3    6.85    1.06
  -3 -21   3   19.59    1.44
   3 -21  -3   21.98    1.60
  -3  21   3   23.45    1.64
  -2 -21   3   42.07    2.04
   2 -21  -3   42.33    2.14
  -2  21   3   36.98    2.05
   1 -21  -3   42.09    2.09
  -1 -21   3   41.76    2.02
  -1  21   3   41.87    2.10
   0 -21   3    0.47    0.48
   0 -21  -3    0.35    0.43
   0  21   3    0.46    0.45
  -1 -21  -3    3.79    0.79
   1 -21   3    3.46    0.76
  -1  21  -3    4.29    0.80
  -2 -21  -3    2.58    0.67
   2 -21   3    2.80    0.70
  -2  21  -3    1.67    0.63
  -3 -21  -3    0.11    0.42
   3 -21   3   -0.28    0.41
  -3  21  -3    0.02    0.45
   4 -21   3    1.28    0.63
  -4 -21  -3    0.59    0.52
  -4  21  -3    1.55    0.69
   5 -21   3  148.37    4.55
  -5  21  -3  143.03    4.60
   6 -21   3   41.85    2.18
  -6  21  -3   37.11    2.18
   7 -21   3   -0.06    0.43
  -7  21  -3    1.15    0.68
  -8  21  -3    0.16    0.55
  -9  21  -3   15.83    1.74
 -10  21  -3    0.32    0.60
 -11  21  -3    0.12    0.59
 -12  21  -3    1.62    0.84
 -13  21  -3   -0.02    0.66
 -14  21  -3   -0.50    0.69
 -15  21  -3    6.94    1.38
 -16  21  -3   -0.19    0.73
 -16  22   3    0.54    0.81
 -15  22   3    7.67    1.42
 -14  22   3    2.62    0.99
 -13  22   3    0.65    0.80
 -12  22   3    4.71    1.17
 -11 -22   3    8.28    0.98
 -11  22   3    7.73    1.33
 -10 -22   3    0.58    0.45
 -10  22   3    1.46    0.75
  -9 -22   3   -0.25    0.35
  -9  22   3    0.34    0.62
  -8 -22   3    9.70    1.10
  -8  22   3    9.16    1.33
  -7 -22   3   36.06    1.84
  -7  22   3   32.64    2.13
  -6 -22   3   -0.05    0.43
   6 -22  -3   -0.13    0.45
  -6  22   3    0.14    0.54
  -5 -22   3    4.37    0.81
   5 -22  -3    6.19    1.01
  -5  22   3    4.98    0.99
   4 -22  -3    0.45    0.52
  -4 -22   3    0.00    0.39
  -4  22   3    0.63    0.56
   3 -22  -3   11.92    1.35
  -3 -22   3   12.69    1.29
  -3  22   3   12.26    1.37
  -2 -22   3   42.60    2.12
   2 -22  -3   46.33    2.28
  -2  22   3   46.61    2.30
  -1 -22   3    0.51    0.45
   1 -22  -3    0.83    0.52
  -1  22   3    1.44    0.64
   0 -22  -3    0.09    0.42
   0 -22   3    0.41    0.44
   1 -22   3    2.69    0.70
  -1 -22  -3    3.95    0.82
  -2 -22  -3    2.59    0.69
   2 -22   3    1.77    0.65
  -2  22  -3    0.64    0.55
  -3 -22  -3    2.74    0.71
   3 -22   3    3.74    0.85
  -3  22  -3    0.84    0.61
  -4 -22  -3   51.46    2.37
   4 -22   3   52.30    2.46
  -4  22  -3   50.68    2.48
   5 -22   3   16.30    1.61
  -5  22  -3   16.45    1.67
   6 -22   3   16.75    1.67
  -6  22  -3   13.03    1.54
  -7  22  -3    2.21    0.79
  -8  22  -3   14.15    1.67
  -9  22  -3    8.28    1.33
 -10  22  -3    1.12    0.75
 -11  22  -3    0.22    0.70
 -12  22  -3   -0.62    0.64
 -13  22  -3   -0.14    0.72
 -14  22  -3    0.06    0.77
 -15  22  -3    1.12    0.87
 -15  23   3    1.65    0.89
 -14  23   3    4.35    1.18
 -13  23   3    5.72    1.27
 -12  23   3    2.32    0.97
 -11 -23   3    1.23    0.51
 -11  23   3    2.04    0.86
 -10 -23   3    3.34    0.73
 -10  23   3    3.85    1.05
  -9 -23   3    0.33    0.49
  -9  23   3    0.47    0.68
  -8 -23   3    4.35    0.85
  -8  23   3    5.11    1.10
  -7 -23   3   42.73    2.13
  -7  23   3   48.27    2.64
   6 -23  -3   71.23    3.08
  -6 -23   3   78.29    2.92
  -6  23   3   79.11    3.34
   5 -23  -3    4.16    0.92
  -5 -23   3    4.34    0.86
  -5  23   3    4.74    1.00
   4 -23  -3    2.28    0.73
  -4 -23   3    1.09    0.54
  -4  23   3    0.97    0.60
   3 -23  -3   -0.14    0.42
  -3 -23   3   -0.39    0.44
  -3  23   3    0.65    0.55
  -2 -23   3    3.83    0.82
   2 -23  -3    4.64    0.92
  -2  23   3    5.23    0.98
  -1 -23   3   30.28    1.81
   1 -23  -3   29.89    1.88
   0 -23   3    0.45    0.43
   0 -23  -3   -0.16    0.40
  -1 -23  -3    0.28    0.43
   1 -23   3    0.66    0.48
  -2 -23  -3    2.88    0.72
   2 -23   3    4.72    0.94
   3 -23   3   -0.90    0.34
  -3 -23  -3   -0.40    0.38
  -3  23  -3   -0.92    0.38
   4 -23   3   -0.21    0.43
  -4 -23  -3    0.32    0.52
  -4  23  -3   -0.21    0.48
   5 -23   3   20.53    1.61
  -5  23  -3   21.12    1.67
   6 -23   3    7.73    1.18
  -6  23  -3    8.35    1.27
  -7  23  -3    3.32    0.92
  -8  23  -3    8.11    1.32
  -9  23  -3    0.36    0.65
 -10  23  -3    5.04    1.18
 -11  23  -3   17.77    1.98
 -12  23  -3    3.04    1.07
 -13  23  -3   -0.16    0.71
 -14  23  -3    2.75    1.01
 -15  23  -3    0.72    0.84
 -15  24   3    3.38    1.15
 -14  24   3   -0.26    0.68
 -13  24   3   -0.07    0.66
 -12  24   3    1.02    0.85
 -11  24   3    2.71    1.01
 -10 -24   3    1.02    0.55
 -10  24   3    0.29    0.73
  -9 -24   3   -0.26    0.46
  -9  24   3   -1.03    0.57
  -8 -24   3   39.67    2.06
  -8  24   3   44.91    2.65
  -7 -24   3   34.32    1.97
  -7  24   3   32.43    2.24
  -6 -24   3    4.71    0.92
   6 -24  -3    9.61    1.37
  -6  24   3    6.37    1.27
  -5 -24   3   11.88    1.32
   5 -24  -3   12.21    1.46
  -5  24   3    9.90    1.43
   4 -24  -3    0.10    0.52
  -4 -24   3    0.78    0.57
  -4  24   3   -0.01    0.58
  -3 -24   3   -0.41    0.44
   3 -24  -3   -0.83    0.42
  -3  24   3    0.50    0.62
   2 -24  -3    0.24    0.52
  -2 -24   3    0.23    0.48
  -2  24   3   -0.57    0.47
   1 -24  -3    0.68    0.51
  -1 -24   3    0.79    0.52
   0 -24  -3    7.57    1.14
   0 -24   3    8.33    1.15
  -1 -24  -3    2.01    0.71
   1 -24   3    0.51    0.53
   2 -24   3   -0.27    0.42
  -2 -24  -3    0.80    0.52
  -3 -24  -3    0.57    0.48
   3 -24   3   -0.30    0.43
  -3  24  -3    0.04    0.55
   4 -24   3   -0.55    0.41
  -4 -24  -3   -0.02    0.44
  -4  24  -3    0.19    0.53
   5 -24   3    2.46    0.77
  -5  24  -3    3.13    0.90
   6 -24   3    0.47    0.57
  -6  24  -3    0.20    0.54
  -7  24  -3   -0.09    0.52
  -8  24  -3    1.31    0.77
  -9  24  -3   26.37    2.09
 -10  24  -3   45.64    2.79
 -11  24  -3   -0.05    0.77
 -12  24  -3    4.43    1.22
 -13  24  -3    1.54    0.91
 -14  24  -3    7.64    1.45
 -14  25   3    0.96    0.88
 -13  25   3    1.03    0.84
 -12  25   3   14.73    1.93
 -11  25   3   -0.30    0.68
 -10 -25   3    1.29    0.58
 -10  25   3   -0.47    0.62
  -9 -25   3    6.23    1.04
  -9  25   3    8.86    1.47
  -8 -25   3    0.57    0.55
  -8  25   3   -0.85    0.68
  -7 -25   3   42.47    2.23
  -7  25   3   43.52    2.64
  -6 -25   3   30.83    1.88
  -6  25   3   28.90    2.15
   5 -25  -3    0.83    0.61
  -5  25   3    1.53    0.73
   4 -25  -3   -0.23    0.50
  -4 -25   3   -0.48    0.40
  -4  25   3   -0.04    0.60
   3 -25  -3    2.52    0.80
  -3 -25   3    2.75    0.75
  -3  25   3    2.56    0.88
  -2 -25   3    1.30    0.64
   2 -25  -3    0.46    0.54
  -1 -25   3    0.72    0.61
   1 -25  -3    1.31    0.63
   0 -25  -3    6.65    1.13
   0 -25   3    5.80    1.06
   1 -25   3    1.91    0.71
  -1 -25  -3    1.38    0.68
  -2 -25  -3    4.55    0.99
   2 -25   3    3.14    0.88
  -3 -25  -3    0.05    0.53
   3 -25   3   -0.26    0.49
  -4 -25  -3   12.57    1.41
   4 -25   3   13.20    1.54
  -4  25  -3   14.13    1.61
   5 -25   3    2.32    0.80
  -5  25  -3    3.58    0.95
   6 -25   3    0.94    0.66
  -6  25  -3    1.71    0.80
  -7  25  -3    1.37    0.78
  -8  25  -3    0.14    0.65
  -9  25  -3   16.81    1.89
 -10  25  -3   12.13    1.71
 -11  25  -3   20.82    2.21
 -12  25  -3   -0.09    0.75
 -13  25  -3    2.24    1.02
 -14  25  -3    1.17    0.90
 -14  26   3    0.07    0.81
 -13  26   3    3.12    1.11
 -12  26   3    0.41    0.82
 -11  26   3   11.45    1.76
 -10 -26   3    0.20    0.46
 -10  26   3    0.13    0.74
  -9 -26   3    0.27    0.54
  -9  26   3    0.52    0.86
  -8 -26   3   19.01    1.52
  -8  26   3   16.25    1.93
  -7 -26   3    1.26    0.63
  -7  26   3   -0.06    0.71
  -6 -26   3   11.38    1.37
  -6  26   3   12.31    1.67
  -5 -26   3    2.26    0.74
   5 -26  -3    1.35    0.70
  -5  26   3    0.71    0.73
   4 -26  -3   -0.24    0.45
  -4 -26   3   -0.53    0.44
  -4  26   3   -0.43    0.58
   3 -26  -3   -0.04    0.50
  -3 -26   3    1.35    0.66
   2 -26  -3    5.08    1.03
  -2 -26   3    3.87    0.98
  -1 -26   3   14.31    1.59
   1 -26  -3   14.36    1.59
   0 -26   3    2.90    0.88
   0 -26  -3    2.11    0.76
  -1 -26  -3    3.25    0.93
   1 -26   3    2.94    0.93
   2 -26   3    0.18    0.65
  -2 -26  -3   -0.09    0.61
  -3 -26  -3    9.10    1.32
   3 -26   3   10.23    1.43
   4 -26   3    4.82    1.04
   5 -26   3    0.76    0.64
  -5  26  -3    1.05    0.71
   6 -26   3   -0.08    0.60
  -6  26  -3   -0.04    0.62
  -7  26  -3    0.27    0.69
  -8  26  -3    3.93    1.12
  -9  26  -3    6.34    1.31
 -10  26  -3   24.64    2.40
 -11  26  -3   -0.44    0.71
 -12  26  -3    4.11    1.20
 -13  26  -3   -0.99    0.70
 -13  27   3    1.11    0.94
 -12  27   3   22.14    2.40
 -11  27   3    5.60    1.36
 -10 -27   3    3.85    0.87
 -10  27   3    2.06    1.01
  -9 -27   3    5.31    0.97
  -9  27   3    5.59    1.31
  -8 -27   3    0.65    0.58
  -8  27   3    0.58    0.80
  -7 -27   3    0.63    0.62
  -7  27   3    1.06    0.83
  -6 -27   3   -0.36    0.45
  -6  27   3    0.01    0.65
   5 -27  -3    6.22    1.19
  -5 -27   3    5.91    1.13
  -5  27   3    6.28    1.27
   4 -27  -3    0.53    0.61
  -4 -27   3    0.54    0.55
  -3 -27   3    1.23    0.66
   3 -27  -3    1.10    0.70
   2 -27  -3    3.28    0.95
  -2 -27   3    3.02    0.88
   1 -27  -3    6.40    1.16
  -1 -27   3    7.20    1.23
   0 -27  -3    5.08    1.09
   0 -27   3    5.87    1.13
   1 -27   3    1.41    0.76
  -1 -27  -3   -0.13    0.58
  -2 -27  -3    1.55    0.78
   2 -27   3    2.13    0.86
   3 -27   3   -0.79    0.49
  -3 -27  -3   -0.15    0.55
   4 -27   3   25.05    1.98
   5 -27   3    3.92    1.04
  -6  27  -3    4.89    1.16
  -7  27  -3    1.08    0.89
  -8  27  -3    0.74    0.83
  -9  27  -3    8.21    1.48
 -10  27  -3    6.30    1.38
 -11  27  -3    0.90    0.93
 -12  27  -3    0.43    0.89
 -13  27  -3    1.17    0.98
 -12  28   3   19.58    2.26
 -11  28   3   17.84    2.21
 -10 -28   3    0.57    0.56
 -10  28   3   -0.21    0.87
  -9 -28   3    0.27    0.50
  -9  28   3    0.11    0.84
  -8 -28   3    0.01    0.51
  -8  28   3   -0.04    0.80
  -7 -28   3    1.12    0.63
  -7  28   3    1.96    1.02
  -6 -28   3    2.22    0.85
  -6  28   3    1.01    0.88
   5 -28  -3   -0.10    0.63
  -5 -28   3   -0.75    0.52
  -4 -28   3    2.29    0.81
   4 -28  -3    1.62    0.79
   3 -28  -3    0.42    0.63
  -3 -28   3    0.28    0.59
   2 -28  -3    0.80    0.68
  -2 -28   3   -0.33    0.53
  -1 -28   3    7.98    1.31
   1 -28  -3    9.07    1.39
   0 -28   3    4.57    1.05
   0 -28  -3    3.92    1.01
  -1 -28  -3    2.11    0.79
   1 -28   3    3.98    1.02
   2 -28   3    0.50    0.65
  -2 -28  -3    0.37    0.63
   3 -28   3    3.45    1.01
   4 -28   3    3.42    0.99
   5 -28   3   -0.24    0.61
  -8  28  -3    0.07    0.81
  -9  28  -3    2.50    1.08
 -10  28  -3    0.54    0.85
 -11  28  -3    4.08    1.25
 -12  28  -3    1.79    1.05
 -12  29   3    0.16    0.92
 -11  29   3   21.48    2.39
 -10  29   3    1.33    1.03
  -9 -29   3    0.14    0.55
  -9  29   3   -0.40    0.84
  -8 -29   3    0.44    0.66
  -8  29   3    1.54    0.98
  -7 -29   3    9.49    1.33
  -7  29   3   10.77    1.69
  -6 -29   3   -0.39    0.52
  -5 -29   3    4.39    1.05
   4 -29  -3    2.66    0.96
  -4 -29   3    6.58    1.23
   3 -29  -3   16.80    1.90
  -3 -29   3   16.65    1.81
   2 -29  -3    0.30    0.60
  -2 -29   3    0.69    0.66
  -1 -29   3   10.52    1.47
   1 -29  -3   13.33    1.71
   0 -29  -3    0.31    0.64
   0 -29   3    1.79    0.78
  -1 -29  -3    0.14    0.57
   1 -29   3   -0.26    0.54
   2 -29   3   -0.59    0.53
   3 -29   3   -0.20    0.61
   4 -29   3   -0.18    0.62
   5 -29   3    2.90    1.06
  -9  29  -3    0.14    0.82
 -10  29  -3    2.36    1.07
 -11  29  -3    1.65    1.02
 -11  30   3    2.38    1.11
 -10  30   3    4.67    1.37
  -9 -30   3    1.07    0.63
  -9  30   3    0.36    0.92
  -8 -30   3    6.06    1.09
  -7 -30   3   -0.20    0.58
  -6 -30   3   -0.21    0.65
  -5 -30   3    2.68    0.93
   4 -30  -3    3.46    1.04
  -4 -30   3    4.34    1.05
   3 -30  -3    0.35    0.72
  -3 -30   3    0.87    0.71
   2 -30  -3    0.55    0.69
  -2 -30   3    0.32    0.65
   1 -30  -3   10.45    1.57
  -1 -30   3    9.51    1.48
   0 -30   3    2.90    1.00
   0 -30  -3    2.10    0.90
   1 -30   3   -1.15    0.53
   2 -30   3    0.25    0.71
   3 -30   3    4.93    1.22
   4 -30   3   -0.08    0.71
   5 -30   3    1.09    0.84
 -11  30  -3    0.06    0.93
 -10  31   3   -0.42    0.93
  -9 -31   3    0.27    0.64
  -8 -31   3    2.40    0.84
  -7 -31   3    1.93    0.81
  -6 -31   3    0.92    0.76
  -5 -31   3    0.53    0.68
  -4 -31   3    0.86    0.78
   3 -31  -3    4.38    1.12
  -3 -31   3    8.68    1.43
  -2 -31   3    0.84    0.86
   2 -31  -3   -0.04    0.74
   1 -31  -3    0.23    0.81
  -1 -31   3    1.39    0.89
   0 -31   3   10.64    1.64
   1 -31   3   -0.71    0.65
   2 -31   3    0.82    0.91
   3 -31   3    1.13    0.92
   4 -31   3    8.46    1.54
  -8 -32   3    1.72    0.87
  -7 -32   3    0.47    0.65
  -6 -32   3    0.26    0.63
  -5 -32   3    0.66    0.72
  -4 -32   3    0.43    0.72
  -3 -32   3    0.40    0.71
  -2 -32   3   -1.05    0.65
  -1 -32   3    9.17    1.58
   0 -32   3   -1.25    0.60
   1 -32   3    3.27    1.16
   2 -32   3    1.49    0.91
   3 -32   3    2.31    1.08
   4 -32   3    0.39    0.83
  -7 -33   3   10.92    1.52
  -6 -33   3    3.56    1.00
  -5 -33   3    2.84    0.98
  -4 -33   3   -0.20    0.69
  -3 -33   3    0.42    0.79
  -2 -33   3   -0.51    0.66
  -1 -33   3    0.71    0.84
   0 -33   3   -0.75    0.66
   1 -33   3    0.13    0.80
   2 -33   3    3.55    1.20
   3 -33   3    1.03    0.95
   4 -33   3    1.47    1.00
  -5 -34   3    5.42    1.22
  -4 -34   3    0.34    0.72
  -3 -34   3    0.54    0.77
  -2 -34   3    1.42    0.96
  -1 -34   3    1.30    0.89
   0 -34   3    1.14    0.87
   1 -34   3    3.34    1.17
   2 -34   3   -0.60    0.77
   3 -34   3    1.36    0.96
  -2 -35   3   -1.01    0.71
  -1 -35   3    0.12    0.85
   0 -35   3    3.67    1.19
   1 -35   3    2.06    1.07
   2 -35   3    0.86    0.98
   3 -35   3   -0.68    0.82
 -16   0   4   45.98    1.56
 -15   0   4   -0.47    0.24
 -14   0   4   21.10    0.97
 -13   0   4   -0.24    0.24
 -12   0   4    0.03    0.21
 -11   0   4    0.36    0.23
 -10   0   4  490.58    9.74
  -9   0   4    0.72    0.21
  -9   0   4    0.17    0.19
  -8   0   4   15.74    0.67
  -8   0   4   17.42    0.68
  -7   0   4   -0.04    0.13
  -6   0   4   16.81    0.65
  -5   0   4   -0.08    0.13
  -4   0   4   20.26    0.72
  -3   0   4    0.05    0.14
  -2   0   4    7.61    0.46
   2   0  -4    7.55    0.42
  -1   0   4   -0.18    0.14
   0   0   4   80.88    1.97
   1   0   4   -0.01    0.15
  -1   0  -4    0.12    0.17
   2   0   4   23.88    0.87
  -2   0  -4   24.34    0.90
   3   0   4    0.23    0.17
  -3   0  -4    0.24    0.17
  -4   0  -4   51.05    1.48
   4   0   4   44.79    1.35
  -5   0  -4    0.01    0.19
   5   0   4   -0.06    0.17
  -6   0  -4  243.44    5.32
  -7   0  -4    0.00    0.19
  -8   0  -4   37.52    1.42
  -9   0  -4    0.13    0.24
 -10   0  -4   16.27    0.97
 -11   0  -4    0.12    0.26
 -12   0  -4    0.48    0.40
 -13   0  -4   -0.04    0.34
 -14   0  -4    9.01    0.94
 -15   0  -4    0.26    0.35
 -16   0  -4    0.00    0.45
 -17   0  -4   -0.47    0.36
 -18   0  -4    1.42    0.52
 -19   0  -4   -0.22    0.41
 -17   1   4    5.09    0.64
 -16   1   4    1.15    0.42
 -15   1   4    0.41    0.33
 -14  -1   4    1.27    0.31
 -14   1   4    1.03    0.35
 -13  -1   4    0.78    0.26
 -13   1   4    0.05    0.26
 -12  -1   4    1.13    0.27
 -12   1   4    0.69    0.29
 -11  -1   4  104.57    2.44
 -11   1   4  102.87    2.61
 -10  -1   4   36.64    1.13
 -10   1   4   36.38    1.27
  -9  -1   4  174.82    3.69
  -9   1   4  175.35    3.83
  -9   1   4  174.07    3.85
  -8  -1   4    6.66    0.40
  -8  -1   4    6.73    0.41
  -8   1   4    6.70    0.48
  -8   1   4    7.18    0.49
  -7  -1   4    1.02    0.19
  -7   1   4    1.27    0.23
  -7   1   4    0.68    0.19
  -6  -1   4  172.74    3.60
  -6   1   4  175.43    3.72
  -5  -1   4  180.74    3.70
  -5   1   4  176.40    3.78
  -4  -1   4   57.45    1.43
  -4   1   4   57.63    1.49
  -3  -1   4    1.20    0.22
  -3   1   4    1.42    0.24
  -2  -1   4   19.29    0.71
   2   1  -4   18.82    0.65
  -2   1   4   19.08    0.75
  -1  -1   4  142.10    3.07
  -1   1   4  139.66    3.11
   1   1  -4  140.06    3.03
   0  -1   4   18.46    0.72
   0   1  -4   18.62    0.71
   0   1   4   16.80    0.72
   1  -1   4  151.93    3.31
  -1   1  -4  150.51    3.32
   1   1   4  150.03    3.32
   2  -1   4    3.31    0.36
  -2   1  -4    3.68    0.40
   2   1   4    3.56    0.38
   3  -1   4   32.58    1.06
   3   1   4   31.05    1.04
  -3   1  -4   33.75    1.12
   4  -1   4   29.64    1.02
   4   1   4   28.16    0.97
  -4   1  -4   29.49    1.07
  -5  -1  -4   84.24    2.21
   5  -1   4   86.96    2.14
  -5   1  -4   81.17    2.22
   5   1   4   84.28    2.08
  -6  -1  -4    7.36    0.59
   6  -1   4    7.50    0.52
  -6   1  -4    7.91    0.61
  -7  -1  -4    0.31    0.24
  -7   1  -4    0.34    0.23
  -8  -1  -4   14.90    0.87
  -8   1  -4   14.12    0.87
  -9  -1  -4   -0.02    0.23
  -9   1  -4    0.50    0.29
 -10  -1  -4    7.72    0.74
 -10   1  -4    6.96    0.74
 -11  -1  -4    0.21    0.27
 -11   1  -4    0.35    0.29
 -12  -1  -4   23.41    1.24
 -12   1  -4   22.75    1.27
 -13  -1  -4   10.14    0.97
 -13   1  -4    8.78    0.94
 -14  -1  -4   -0.13    0.29
 -14   1  -4    0.37    0.38
 -15  -1  -4    0.25    0.34
 -15   1  -4   -0.18    0.33
 -16  -1  -4   16.28    1.19
 -16   1  -4   18.63    1.29
 -17  -1  -4    0.01    0.42
 -17   1  -4   -0.71    0.40
 -18  -1  -4    0.43    0.42
 -18   1  -4    1.43    0.56
 -19  -1  -4    0.70    0.51
 -19   1  -4    0.80    0.53
 -20   1  -4    1.42    0.58
 -17   2   4    0.52    0.38
 -16   2   4    8.58    0.84
 -15   2   4   -0.06    0.31
 -14   2   4    0.09    0.27
 -13   2   4    3.32    0.50
 -12   2   4    7.79    0.70
 -11  -2   4   17.08    0.69
 -11   2   4   18.27    0.92
 -10  -2   4  134.59    2.88
 -10  -2   4  137.60    2.92
 -10   2   4  133.22    3.23
  -9  -2   4   99.81    2.21
  -9  -2   4  100.24    2.21
  -9   2   4  100.86    2.51
  -8  -2   4    4.85    0.33
  -8   2   4    5.85    0.48
  -8   2   4    4.79    0.45
  -7  -2   4   42.11    1.07
  -7   2   4   41.30    1.27
  -6  -2   4   34.64    0.94
  -6   2   4   32.94    1.09
  -5  -2   4  616.86   11.98
  -5   2   4  629.05   12.17
  -4  -2   4  104.86    2.32
  -4   2   4  105.40    2.45
  -3  -2   4    1.78    0.25
  -3   2   4    1.25    0.25
  -2  -2   4    4.25    0.36
  -2   2   4    4.26    0.40
  -1  -2   4  368.71    7.30
  -1   2   4  368.58    7.40
   1   2  -4  363.33    7.27
   0  -2   4    6.88    0.46
   0   2  -4    6.26    0.43
   0   2   4    7.01    0.50
   1  -2   4   36.62    1.12
  -1   2  -4   35.72    1.11
   1   2   4   35.88    1.14
   2  -2   4    0.54    0.19
   2   2   4    0.23    0.18
  -2   2  -4    0.56    0.19
   3  -2   4   33.27    1.12
  -3   2  -4   36.49    1.20
   3   2   4   35.73    1.13
   4  -2   4    5.16    0.47
   4   2   4    5.48    0.44
  -4   2  -4    4.92    0.49
   5  -2   4   25.14    0.94
  -5   2  -4   23.02    0.99
  -6  -2  -4   13.03    0.74
   6  -2   4   12.18    0.67
  -6   2  -4   13.48    0.78
  -7  -2  -4    5.53    0.57
  -7   2  -4    4.71    0.54
  -8  -2  -4   21.80    1.02
  -8   2  -4   20.84    1.06
  -9  -2  -4    1.81    0.40
  -9   2  -4    3.01    0.49
 -10  -2  -4    1.76    0.40
 -10   2  -4    1.61    0.44
 -11  -2  -4    0.21    0.25
 -11   2  -4   -0.23    0.25
 -12  -2  -4   -0.15    0.31
 -12   2  -4    0.50    0.40
 -13  -2  -4   22.16    1.23
 -13   2  -4   21.27    1.30
 -14  -2  -4    0.39    0.36
 -14   2  -4    0.31    0.36
 -15  -2  -4    3.47    0.62
 -15   2  -4    4.24    0.74
 -16  -2  -4    9.94    1.02
 -16   2  -4    9.20    1.06
 -17  -2  -4   44.01    1.91
 -17   2  -4   48.95    2.14
 -18  -2  -4    4.74    0.75
 -18   2  -4    2.38    0.68
 -19  -2  -4    0.64    0.47
 -19   2  -4    0.03    0.48
 -20   2  -4    2.64    0.70
 -18   3   4   -0.20    0.37
 -17   3   4    0.03    0.35
 -16   3   4    0.18    0.36
 -15   3   4   11.43    0.91
 -14   3   4    0.59    0.34
 -13   3   4    2.61    0.48
 -12   3   4    0.32    0.28
 -11   3   4   62.65    1.93
 -10   3   4  109.85    2.83
  -9   3   4    4.75    0.53
  -8   3   4    0.18    0.19
  -7   3   4    6.40    0.51
  -6  -3   4  438.73    8.64
  -6   3   4  455.15    8.99
  -5  -3   4  209.36    4.32
  -5  -3   4  217.90    4.29
  -5   3   4  214.41    4.59
  -4  -3   4   52.37    1.28
  -4  -3   4   50.98    1.30
  -4   3   4   52.47    1.47
  -3  -3   4   12.24    0.54
  -3   3   4   11.57    0.60
  -2  -3   4   55.92    1.44
  -2   3   4   55.97    1.56
  -1  -3   4   17.31    0.69
   1   3  -4   17.16    0.66
  -1   3   4   19.04    0.79
   0  -3   4    2.44    0.30
   0   3   4    2.96    0.37
   0   3  -4    3.09    0.32
   1  -3   4   42.76    1.28
  -1   3  -4   45.16    1.31
   1   3   4   45.99    1.36
   2  -3   4    9.13    0.55
  -2   3  -4    7.00    0.51
   2   3   4    7.99    0.53
   3  -3   4    1.73    0.31
   3   3   4    1.23    0.26
  -3   3  -4    1.43    0.30
   4  -3   4    0.58    0.22
  -4   3  -4   -0.04    0.17
   4   3   4    0.02    0.15
   5  -3   4   13.66    0.71
  -5   3  -4   15.73    0.82
   6  -3   4   14.43    0.75
  -6   3  -4   15.72    0.87
   7  -3   4    6.16    0.56
  -7   3  -4    5.97    0.62
  -8  -3  -4   33.13    1.28
  -8   3  -4   30.87    1.33
  -9  -3  -4    9.43    0.71
  -9   3  -4    9.82    0.88
 -10  -3  -4   42.13    1.57
 -10   3  -4   43.53    1.71
 -11  -3  -4   11.81    0.85
 -11   3  -4   12.31    0.93
 -12  -3  -4   41.65    1.67
 -12   3  -4   44.05    1.83
 -13  -3  -4    1.43    0.46
 -13   3  -4    1.33    0.49
 -14  -3  -4    1.09    0.43
 -14   3  -4    1.87    0.57
 -15  -3  -4   11.23    1.02
 -15   3  -4   13.56    1.25
 -16  -3  -4   60.48    2.25
 -16   3  -4   62.18    2.46
 -17  -3  -4   18.82    1.26
 -17   3  -4   17.80    1.39
 -18  -3  -4    1.91    0.55
 -18   3  -4    1.39    0.62
 -19   3  -4    1.04    0.60
 -20   3  -4    3.34    0.76
 -18   4   4    0.11    0.41
 -17   4   4   -0.09    0.40
 -16   4   4    0.19    0.38
 -15   4   4   20.73    1.23
 -14   4   4   70.77    2.34
 -13   4   4    0.15    0.33
 -12   4   4   12.96    0.90
 -11   4   4    0.20    0.29
 -10   4   4   -0.01    0.24
  -9   4   4   57.48    1.80
  -8   4   4   -0.12    0.18
  -7   4   4    5.82    0.55
  -6  -4   4  124.64    2.58
  -6  -4   4  125.67    2.61
  -6   4   4  123.31    2.98
  -5  -4   4  443.00    8.59
  -5  -4   4  440.69    8.57
  -5   4   4  443.44    8.94
  -4  -4   4  181.05    3.68
  -4  -4   4  176.64    3.69
  -4   4   4  178.25    3.95
  -3  -4   4   13.40    0.56
  -3   4   4   11.69    0.64
  -2  -4   4   52.24    1.38
  -2   4   4   53.36    1.53
  -1  -4   4    1.57    0.27
  -1   4   4    1.66    0.30
   1   4  -4    1.53    0.24
   0  -4   4    0.44    0.19
   0   4   4    0.58    0.23
   0   4  -4    0.27    0.17
   1  -4   4  223.95    4.83
  -1   4  -4  236.14    4.87
   1   4   4  226.63    4.91
   2  -4   4   28.88    1.04
   2   4   4   29.21    1.05
  -2   4  -4   29.54    1.06
   3  -4   4    9.98    0.62
   3   4   4   10.24    0.60
  -3   4  -4    8.71    0.60
   4  -4   4   10.39    0.64
   4   4   4   10.66    0.59
  -4   4  -4   10.98    0.69
   5  -4   4    5.87    0.53
  -5   4  -4    5.28    0.57
   6  -4   4  101.46    2.56
  -6   4  -4   98.48    2.70
   7  -4   4    1.08    0.30
  -7   4  -4    0.70    0.30
  -8   4  -4    4.48    0.59
  -9  -4  -4    0.82    0.30
  -9   4  -4    0.70    0.35
 -10  -4  -4   46.96    1.68
 -10   4  -4   46.45    1.81
 -11  -4  -4    7.49    0.76
 -11   4  -4    9.59    0.96
 -12  -4  -4    3.55    0.60
 -12   4  -4    3.77    0.68
 -13  -4  -4    0.71    0.37
 -13   4  -4    0.49    0.41
 -14  -4  -4    0.43    0.35
 -14   4  -4    0.22    0.40
 -15  -4  -4    5.27    0.73
 -15   4  -4    3.56    0.73
 -16  -4  -4   26.83    1.45
 -16   4  -4   26.43    1.63
 -17  -4  -4   17.83    1.20
 -17   4  -4   16.37    1.50
 -18  -4  -4    7.52    0.87
 -18   4  -4    5.42    0.95
 -19   4  -4    0.14    0.49
 -20   4  -4    0.99    0.58
 -19   5   4    2.17    0.65
 -18   5   4   -0.22    0.42
 -17   5   4    2.68    0.63
 -16   5   4   28.92    1.52
 -15   5   4   35.66    1.66
 -14   5   4   27.86    1.45
 -13   5   4   13.08    0.98
 -12   5   4    5.86    0.73
 -11   5   4    4.35    0.60
 -10   5   4    8.21    0.76
  -9   5   4    3.08    0.48
  -8   5   4   -0.15    0.18
  -7   5   4    6.27    0.61
  -6  -5   4   27.50    0.76
  -6  -5   4   26.28    0.77
  -6   5   4   26.30    1.08
  -5  -5   4   77.38    1.78
  -5  -5   4   80.22    1.80
  -5   5   4   78.16    2.13
  -4  -5   4   10.46    0.47
  -4  -5   4    9.75    0.48
  -4   5   4    9.77    0.62
  -3  -5   4    0.08    0.15
  -3   5   4    0.20    0.20
  -2  -5   4    5.22    0.41
  -2   5   4    5.13    0.48
   2   5  -4    5.82    0.39
  -1  -5   4  245.02    5.25
   1   5  -4  265.36    5.24
  -1   5   4  251.14    5.41
   0  -5   4  339.10    6.92
   0   5   4  337.14    7.03
   0   5  -4  341.93    6.90
   1  -5   4   58.59    1.63
   1   5   4   54.72    1.65
  -1   5  -4   57.79    1.62
   2  -5   4    0.85    0.25
  -2   5  -4    0.20    0.20
   2   5   4    0.77    0.24
   3  -5   4   54.03    1.59
  -3   5  -4   53.62    1.64
   3   5   4   53.01    1.56
   4  -5   4   12.70    0.72
  -4   5  -4   11.99    0.74
   4   5   4   12.12    0.65
   5  -5   4   99.20    2.56
  -5   5  -4  100.21    2.67
   6  -5   4    6.29    0.59
  -6   5  -4    5.53    0.61
   7  -5   4    1.10    0.31
  -7   5  -4    0.51    0.28
   8  -5   4    7.80    0.69
  -8   5  -4    6.59    0.73
  -9   5  -4   18.30    1.10
 -10  -5  -4   19.92    1.04
 -10   5  -4   18.38    1.14
 -11  -5  -4   -0.06    0.28
 -11   5  -4    0.22    0.33
 -12  -5  -4    4.23    0.63
 -12   5  -4    3.69    0.70
 -13  -5  -4   12.79    0.94
 -13   5  -4   13.38    1.10
 -14  -5  -4   -0.19    0.28
 -14   5  -4    0.26    0.42
 -15  -5  -4    1.70    0.49
 -15   5  -4    1.93    0.60
 -16  -5  -4   12.86    1.05
 -16   5  -4   12.10    1.25
 -17  -5  -4   26.61    1.38
 -17   5  -4   24.67    1.70
 -18  -5  -4    0.72    0.44
 -18   5  -4    0.23    0.56
 -19   5  -4   -0.08    0.52
 -20   5  -4    1.07    0.63
 -19   6   4    0.89    0.62
 -18   6   4    6.44    0.95
 -17   6   4    1.22    0.53
 -16   6   4    0.13    0.42
 -15   6   4   72.64    2.57
 -14   6   4   69.83    2.47
 -13   6   4    2.52    0.56
 -12   6   4    9.86    0.95
 -11   6   4   45.74    1.77
 -10   6   4   15.36    0.97
  -9   6   4   13.12    0.86
  -8   6   4    1.41    0.37
  -7  -6   4    6.39    0.34
  -7  -6   4    5.56    0.32
  -7   6   4    7.14    0.69
  -6  -6   4   80.86    1.84
  -6  -6   4   85.08    1.84
  -6   6   4   76.97    2.25
  -5  -6   4    6.48    0.38
  -5  -6   4    6.82    0.40
  -5   6   4    6.27    0.59
  -4  -6   4   23.47    0.80
  -4   6   4   25.56    1.04
  -3  -6   4    0.80    0.20
  -3   6   4    0.95    0.27
  -2  -6   4   68.04    1.74
  -2   6   4   66.35    1.90
   2   6  -4   67.32    1.67
  -1  -6   4  343.79    7.05
  -1   6   4  350.10    7.22
   1   6  -4  344.76    6.99
   0  -6   4  229.56    4.92
   0   6  -4  229.07    4.89
   0   6   4  232.16    5.05
   1  -6   4  140.24    3.26
  -1   6  -4  138.23    3.26
   1   6   4  142.46    3.33
   2  -6   4    1.31    0.29
  -2   6  -4    0.76    0.25
   2   6   4    1.26    0.30
   3  -6   4    4.05    0.48
   3   6   4    4.51    0.49
  -3   6  -4    3.64    0.47
   4  -6   4   53.30    1.66
  -4   6  -4   53.50    1.72
   4   6   4   53.17    1.56
   5  -6   4   26.35    1.11
  -5   6  -4   27.96    1.20
   6  -6   4   36.52    1.35
  -6   6  -4   36.78    1.46
   7  -6   4   18.21    0.94
  -7   6  -4   17.62    1.02
   8  -6   4   33.78    1.35
  -8   6  -4   35.14    1.52
  -9   6  -4    5.05    0.72
 -10  -6  -4   -0.09    0.25
 -10   6  -4    0.54    0.38
 -11  -6  -4   44.17    1.69
 -11   6  -4   46.83    1.96
 -12  -6  -4   61.81    2.12
 -12   6  -4   66.86    2.46
 -13  -6  -4   13.21    0.95
 -13   6  -4   14.14    1.16
 -14  -6  -4    5.64    0.73
 -14   6  -4    5.12    0.84
 -15  -6  -4    4.46    0.68
 -15   6  -4    6.27    0.94
 -16  -6  -4    4.64    0.71
 -16   6  -4    3.04    0.76
 -17  -6  -4    2.96    0.62
 -17   6  -4    1.14    0.70
 -18   6  -4    5.96    1.02
 -19   6  -4   -0.59    0.46
 -20   6  -4    0.74    0.60
 -20   7   4    0.24    0.56
 -19   7   4   -0.01    0.56
 -18   7   4    3.96    0.84
 -17   7   4    0.66    0.50
 -16   7   4   20.18    1.36
 -15   7   4   14.55    1.19
 -14   7   4   18.95    1.30
 -13   7   4    4.41    0.72
 -12   7   4   -0.07    0.30
 -11   7   4    5.40    0.73
 -10   7   4   75.68    2.42
  -9   7   4    0.60    0.33
  -8   7   4    1.77    0.41
  -7  -7   4   35.96    1.00
  -7  -7   4   37.56    1.00
  -7   7   4   37.92    1.47
  -6  -7   4   52.35    1.31
  -6  -7   4   49.94    1.29
  -6   7   4   47.82    1.69
  -5  -7   4   11.09    0.53
  -5  -7   4    9.14    0.49
  -5   7   4   10.20    0.71
  -4  -7   4    0.75    0.21
  -4   7   4    0.55    0.24
  -3  -7   4   57.90    1.56
  -3   7   4   57.42    1.77
  -2  -7   4   40.00    1.24
   2   7  -4   38.33    1.17
  -2   7   4   40.21    1.39
  -1  -7   4  428.57    8.75
   1   7  -4  438.66    8.69
  -1   7   4  434.14    8.91
   0  -7   4  367.81    7.54
   0   7  -4  359.08    7.50
   0   7   4  373.65    7.67
   1  -7   4   36.98    1.27
   1   7   4   37.69    1.32
  -1   7  -4   35.98    1.26
   2  -7   4    0.21    0.19
  -2   7  -4    0.05    0.19
   2   7   4    0.16    0.20
   3  -7   4   97.24    2.54
  -3   7  -4   98.83    2.59
   3   7   4   94.07    2.48
   4  -7   4    0.42    0.23
  -4   7  -4    0.38    0.25
   4   7   4    0.33    0.22
   5  -7   4   15.21    0.85
  -5   7  -4   15.95    0.92
   6  -7   4    0.45    0.25
  -6   7  -4    0.84    0.31
   7  -7   4   36.28    1.40
  -7   7  -4   35.60    1.51
   8  -7   4    0.52    0.30
  -8   7  -4    0.28    0.32
  -9   7  -4   -0.30    0.27
 -10   7  -4    0.42    0.37
 -11  -7  -4  127.97    3.45
 -11   7  -4  133.74    3.83
 -12  -7  -4   90.94    2.70
 -12   7  -4   88.42    3.03
 -13  -7  -4   13.63    0.96
 -13   7  -4   16.67    1.25
 -14  -7  -4    0.74    0.38
 -14   7  -4    0.83    0.51
 -15  -7  -4   14.87    1.03
 -15   7  -4   13.29    1.36
 -16  -7  -4    2.80    0.61
 -16   7  -4    4.11    0.87
 -17  -7  -4   11.98    1.03
 -17   7  -4   12.56    1.43
 -18   7  -4   -0.18    0.50
 -19   7  -4   -0.35    0.47
 -20   7  -4    0.08    0.57
 -20   8   4    3.62    0.87
 -19   8   4   15.13    1.47
 -18   8   4    0.25    0.55
 -17   8   4    0.06    0.44
 -16   8   4   -0.06    0.41
 -15   8   4    3.12    0.67
 -14   8   4    6.71    0.90
 -13   8   4    0.46    0.37
 -12   8   4    1.00    0.44
 -11   8   4    6.64    0.82
 -10   8   4    2.25    0.53
  -9   8   4   25.33    1.29
  -8  -8   4    2.04    0.25
  -8  -8   4    2.15    0.26
  -8   8   4    1.45    0.44
  -7  -8   4    2.95    0.30
  -7  -8   4    3.17    0.31
  -7   8   4    1.89    0.46
  -6  -8   4   68.98    1.67
  -6  -8   4   65.98    1.66
  -6   8   4   63.76    2.09
  -5  -8   4   41.63    1.17
  -5  -8   4   37.71    1.16
  -5   8   4   36.70    1.45
  -4  -8   4  132.69    3.00
  -4   8   4  129.66    3.32
  -3  -8   4   16.53    0.75
  -3   8   4   16.73    0.89
  -2  -8   4   40.06    1.27
   2   8  -4   39.26    1.20
  -2   8   4   35.60    1.37
  -1  -8   4  207.36    4.57
   1   8  -4  212.17    4.54
  -1   8   4  205.43    4.71
   0  -8   4  283.34    6.09
   0   8  -4  292.48    6.07
   0   8   4  284.93    6.21
   1  -8   4    2.83    0.40
   1   8   4    3.43    0.46
  -1   8  -4    3.11    0.42
   2  -8   4   18.00    0.89
   2   8   4   17.18    0.88
  -2   8  -4   17.38    0.89
   3  -8   4    6.18    0.59
   3   8   4    6.64    0.63
  -3   8  -4    6.93    0.67
   4  -8   4    1.06    0.31
   4   8   4    1.02    0.29
  -4   8  -4    0.80    0.30
   5  -8   4    9.19    0.71
  -5   8  -4    8.25    0.79
   6  -8   4    1.33    0.35
  -6   8  -4    1.01    0.36
   7  -8   4    1.43    0.38
  -7   8  -4    1.98    0.48
   8  -8   4   -0.12    0.24
  -8   8  -4   -0.23    0.27
  -9   8  -4   -0.33    0.28
 -10   8  -4   35.57    1.70
 -11   8  -4   14.47    1.18
 -12  -8  -4   77.62    2.48
 -12   8  -4   80.53    2.87
 -13  -8  -4   39.63    1.64
 -13   8  -4   36.30    1.89
 -14  -8  -4    6.95    0.79
 -14   8  -4    7.51    1.04
 -15  -8  -4    2.28    0.54
 -15   8  -4    1.92    0.70
 -16  -8  -4    5.04    0.72
 -16   8  -4    4.03    0.89
 -17  -8  -4    5.48    0.74
 -17   8  -4    6.56    1.08
 -18   8  -4    9.74    1.28
 -19   8  -4    0.56    0.56
 -20   9   4    6.88    1.07
 -19   9   4    8.37    1.16
 -18   9   4    2.59    0.77
 -17   9   4   -0.40    0.42
 -16   9   4    1.12    0.55
 -15   9   4    0.79    0.51
 -14   9   4    0.36    0.46
 -13   9   4   -0.01    0.37
 -12   9   4   29.89    1.59
 -11   9   4    2.59    0.62
 -10   9   4    0.89    0.39
  -9   9   4   20.90    1.21
  -8  -9   4    1.60    0.26
  -8  -9   4    1.51    0.25
  -8   9   4    0.58    0.36
  -7  -9   4   59.99    1.55
  -7  -9   4   58.63    1.55
  -7   9   4   61.17    2.09
  -6  -9   4    5.20    0.45
  -6  -9   4    4.80    0.43
  -6   9   4    3.81    0.59
  -5  -9   4   11.19    0.59
  -5   9   4    9.35    0.85
  -4  -9   4   40.50    1.26
  -4   9   4   36.71    1.47
  -3  -9   4   43.01    1.34
  -3   9   4   39.49    1.50
  -2  -9   4   29.51    1.13
   2   9  -4   33.52    1.13
  -2   9   4   34.71    1.34
  -1  -9   4   40.47    1.39
  -1   9   4   42.99    1.52
   1   9  -4   40.47    1.35
   0  -9   4    0.10    0.19
   0   9  -4    0.22    0.22
   0   9   4    0.32    0.25
   1  -9   4   97.96    2.61
   1   9   4  100.64    2.69
  -1   9  -4   98.14    2.60
   2  -9   4    0.40    0.27
   2   9   4    1.02    0.32
  -2   9  -4    0.45    0.27
   3  -9   4   55.22    1.81
   3   9   4   54.31    1.75
  -3   9  -4   56.18    1.85
   4  -9   4  108.22    2.91
   4   9   4  107.79    2.79
  -4   9  -4  108.82    2.98
   5  -9   4   12.18    0.84
  -5   9  -4   11.27    0.84
   6  -9   4   10.95    0.81
  -6   9  -4    9.58    0.90
   7  -9   4   13.21    0.94
  -7   9  -4   14.85    1.05
   8  -9   4    0.57    0.34
  -8   9  -4    0.93    0.40
  -9   9  -4    2.05    0.52
 -10   9  -4    1.30    0.48
 -11   9  -4   74.94    2.73
 -12  -9  -4   45.57    1.81
 -12   9  -4   46.23    2.13
 -13  -9  -4    4.48    0.68
 -13   9  -4    4.76    0.85
 -14  -9  -4    1.09    0.43
 -14   9  -4   -0.10    0.51
 -15  -9  -4   16.51    1.09
 -15   9  -4   17.59    1.44
 -16  -9  -4    1.88    0.53
 -16   9  -4    3.10    0.81
 -17  -9  -4    1.34    0.48
 -17   9  -4    2.34    0.76
 -18   9  -4    2.71    0.82
 -19   9  -4    1.07    0.65
 -20  10   4    3.92    0.93
 -19  10   4   24.42    1.74
 -18  10   4    7.46    1.11
 -17  10   4    0.38    0.54
 -16  10   4    1.62    0.67
 -15  10   4   24.00    1.60
 -14  10   4   11.34    1.24
 -13  10   4    1.28    0.52
 -12  10   4    0.90    0.49
 -11  10   4   96.58    3.14
 -10  10   4    9.24    0.97
  -9 -10   4   15.64    0.67
  -9  10   4   14.36    1.07
  -8 -10   4    1.70    0.28
  -8  10   4    1.60    0.43
  -7 -10   4    1.34    0.26
  -7  10   4    1.06    0.42
  -6 -10   4   12.87    0.66
  -6 -10   4   13.12    0.66
  -6  10   4   11.83    0.90
  -5 -10   4    4.81    0.48
  -5  10   4    4.77    0.62
  -4 -10   4    6.56    0.53
   4 -10  -4    6.38    0.67
  -4  10   4    5.55    0.66
   3 -10  -4    3.81    0.53
  -3 -10   4    4.05    0.46
  -3  10   4    3.77    0.54
  -2 -10   4   -0.02    0.17
   2 -10  -4    0.18    0.22
   2  10  -4   -0.17    0.15
  -2  10   4    0.23    0.24
   1 -10  -4    5.37    0.60
  -1 -10   4    5.92    0.58
  -1  10   4    5.85    0.64
   1  10  -4    5.48    0.56
   0 -10   4    9.70    0.69
   0  10  -4    9.38    0.67
   0  10   4    9.90    0.76
   1 -10   4   35.56    1.34
   1  10   4   32.66    1.35
  -1  10  -4   31.19    1.28
   2 -10   4    8.80    0.69
   2  10   4    8.31    0.68
  -2  10  -4    7.51    0.70
   3 -10   4   25.12    1.16
   3  10   4   21.42    1.06
  -3  10  -4   23.85    1.16
   4 -10   4  212.50    4.98
  -4  10  -4  211.94    5.05
   4  10   4  210.44    4.81
   5 -10   4  108.94    3.01
  -5  10  -4  109.17    3.12
   6 -10   4   68.03    2.23
  -6  10  -4   68.69    2.34
   7 -10   4   88.92    2.73
  -7  10  -4   91.74    2.89
   8 -10   4   95.61    2.87
  -8  10  -4   97.91    3.07
  -9  10  -4    0.28    0.36
 -10  10  -4    3.31    0.68
 -11  10  -4    0.79    0.47
 -12  10  -4    4.55    0.85
 -13 -10  -4    8.28    0.88
 -13  10  -4    6.91    1.01
 -14 -10  -4    5.39    0.72
 -14  10  -4    4.37    0.91
 -15 -10  -4    0.16    0.37
 -15  10  -4   -0.16    0.50
 -16 -10  -4    0.16    0.37
 -16  10  -4   -0.43    0.44
 -17  10  -4    0.16    0.53
 -18  10  -4    1.73    0.78
 -19  10  -4    0.81    0.67
 -20  11   4    7.68    1.16
 -19  11   4    9.71    1.27
 -18  11   4   -0.16    0.53
 -17  11   4    0.54    0.59
 -16  11   4    2.48    0.70
 -15  11   4    5.50    0.97
 -14  11   4   -0.85    0.45
 -13  11   4    2.32    0.66
 -12  11   4   12.95    1.28
 -11  11   4    5.38    0.86
 -10  11   4   14.31    1.29
  -9 -11   4    0.19    0.20
  -9  11   4    0.52    0.37
  -8 -11   4   21.93    0.88
  -8  11   4   20.62    1.27
  -7 -11   4    0.84    0.24
  -7  11   4    0.68    0.38
  -6 -11   4    2.09    0.34
  -6  11   4    2.54    0.53
  -5 -11   4   14.17    0.77
  -5  11   4   16.86    1.05
   4 -11  -4    3.73    0.57
  -4 -11   4    4.51    0.51
  -4  11   4    4.94    0.65
  -3 -11   4    3.76    0.46
   3 -11  -4    3.35    0.52
  -3  11   4    3.12    0.51
  -2 -11   4   22.69    1.01
   2 -11  -4   21.79    1.09
   2  11  -4   18.84    0.91
  -2  11   4   19.36    1.07
  -1 -11   4   42.22    1.53
   1 -11  -4   44.33    1.62
   1  11  -4   46.65    1.53
  -1  11   4   42.77    1.63
   0 -11  -4   84.52    2.45
   0 -11   4   82.47    2.40
   0  11   4   84.36    2.50
   0  11  -4   85.93    2.39
   1 -11   4    0.60    0.29
  -1 -11  -4    0.23    0.24
  -1  11  -4    0.19    0.24
   1  11   4    0.00    0.22
   2 -11   4    0.09    0.22
  -2  11  -4    0.25    0.24
   2  11   4   -0.16    0.22
   3 -11   4  164.10    4.08
   3  11   4  169.80    4.04
  -3  11  -4  157.06    4.08
   4 -11   4  280.15    6.39
   4  11   4  282.54    6.24
  -4  11  -4  286.54    6.49
   5 -11   4  132.07    3.53
  -5  11  -4  130.66    3.62
   6 -11   4   24.80    1.30
  -6  11  -4   24.62    1.35
   7 -11   4  220.52    5.30
  -7  11  -4  213.65    5.45
   8 -11   4   27.32    1.44
  -8  11  -4   30.47    1.61
  -9  11  -4   10.99    1.12
 -10  11  -4    5.58    0.84
 -11  11  -4    4.08    0.82
 -12  11  -4    0.02    0.46
 -13 -11  -4    1.21    0.45
 -13  11  -4    1.82    0.69
 -14 -11  -4    2.84    0.57
 -14  11  -4    1.99    0.73
 -15 -11  -4    2.83    0.58
 -15  11  -4    2.89    0.78
 -16 -11  -4   -0.10    0.35
 -16  11  -4   -0.26    0.50
 -17  11  -4   -0.36    0.47
 -18  11  -4    0.41    0.62
 -19  11  -4    1.40    0.76
 -19  12   4    3.61    0.92
 -18  12   4    7.08    1.15
 -17  12   4    3.96    0.90
 -16  12   4   -0.31    0.47
 -15  12   4    0.97    0.62
 -14  12   4    4.39    0.90
 -13  12   4    0.41    0.51
 -12  12   4    2.09    0.68
 -11  12   4   16.80    1.36
 -10  12   4    5.15    0.83
  -9 -12   4   14.24    0.73
  -9  12   4   14.87    1.15
  -8 -12   4   14.73    0.79
  -8  12   4   16.92    1.20
  -7 -12   4   20.77    0.93
  -7  12   4   20.02    1.27
  -6 -12   4   15.24    0.83
  -6  12   4   17.65    1.13
   5 -12  -4   -0.24    0.27
  -5 -12   4    0.21    0.26
  -5  12   4    0.67    0.35
   4 -12  -4  103.16    3.03
  -4 -12   4  107.71    2.82
  -4  12   4  113.98    3.19
   3 -12  -4   14.13    0.98
  -3 -12   4   13.39    0.82
   3  12  -4   13.47    0.75
  -3  12   4   12.89    0.94
   2 -12  -4    9.49    0.78
  -2 -12   4   10.03    0.72
   2  12  -4    9.55    0.66
  -2  12   4   10.65    0.82
   1 -12  -4    3.13    0.53
  -1 -12   4    2.23    0.41
   1  12  -4    2.67    0.43
  -1  12   4    2.55    0.49
   0 -12  -4   62.65    2.10
   0 -12   4   65.87    2.09
   0  12  -4   67.16    2.06
   0  12   4   66.74    2.16
  -1 -12  -4   19.06    1.05
   1 -12   4   18.60    1.03
   1  12   4   17.03    1.02
  -1  12  -4   18.86    1.02
   2 -12   4    0.90    0.33
  -2  12  -4    1.13    0.36
   2  12   4    1.16    0.36
   3 -12   4   33.77    1.45
  -3  12  -4   29.43    1.41
   3  12   4   29.80    1.33
   4 -12   4  148.10    3.78
  -4  12  -4  136.07    3.81
   4  12   4  140.99    3.60
   5 -12   4   62.05    2.19
  -5  12  -4   67.61    2.34
   6 -12   4  132.11    3.68
  -6  12  -4  134.82    3.81
   7 -12   4  118.76    3.45
  -7  12  -4  122.51    3.63
   8 -12   4   61.57    2.28
  -8  12  -4   66.43    2.51
  -9  12  -4   12.66    1.23
 -10  12  -4    2.03    0.63
 -11  12  -4    6.56    1.01
 -12  12  -4    7.25    1.06
 -13  12  -4    2.31    0.76
 -14 -12  -4   -0.07    0.32
 -14  12  -4   -0.23    0.48
 -15 -12  -4    2.76    0.59
 -15  12  -4    0.79    0.67
 -16 -12  -4   10.52    0.96
 -16  12  -4   10.97    1.41
 -17  12  -4    0.93    0.66
 -18  12  -4    0.65    0.70
 -19  12  -4    7.55    1.29
 -19  13   4    1.07    0.71
 -18  13   4    0.56    0.64
 -17  13   4   -0.36    0.51
 -16  13   4    2.94    0.83
 -15  13   4   -0.26    0.51
 -14  13   4   -0.35    0.46
 -13  13   4    0.06    0.47
 -12  13   4    0.20    0.48
 -11  13   4   23.93    1.59
 -10 -13   4    1.56    0.33
 -10  13   4    1.24    0.52
  -9 -13   4   20.55    0.93
  -9  13   4   22.63    1.43
  -8 -13   4   56.49    1.74
  -8  13   4   58.43    2.32
  -7 -13   4   25.50    1.10
  -7  13   4   24.76    1.44
  -6 -13   4    1.63    0.39
   6 -13  -4    1.81    0.52
  -6  13   4    2.55    0.58
   5 -13  -4   76.83    2.45
  -5 -13   4   68.44    2.11
  -5  13   4   69.63    2.46
  -4 -13   4   12.51    0.87
   4 -13  -4   13.61    1.03
  -4  13   4   15.16    1.08
  -3 -13   4    4.28    0.57
   3 -13  -4    4.02    0.64
   3  13  -4    3.85    0.52
  -3  13   4    2.72    0.55
  -2 -13   4    3.77    0.53
   2 -13  -4    4.12    0.61
  -2  13   4    5.00    0.67
   2  13  -4    4.75    0.55
  -1 -13   4    0.05    0.22
   1 -13  -4    0.47    0.28
   1  13  -4    0.10    0.23
  -1  13   4    0.40    0.29
   0 -13   4    1.44    0.39
   0 -13  -4    1.60    0.42
   0  13  -4    1.23    0.36
   0  13   4    0.98    0.37
   1 -13   4   -0.17    0.20
  -1 -13  -4    0.09    0.25
   1  13   4    0.27    0.29
  -1  13  -4    0.06    0.24
   2 -13   4   12.88    0.92
  -2 -13  -4   13.64    0.94
  -2  13  -4   13.07    0.92
   2  13   4   13.58    0.94
   3 -13   4    0.13    0.27
   3  13   4    0.35    0.32
  -3  13  -4    0.29    0.32
   4 -13   4   40.02    1.69
   4  13   4   39.97    1.58
  -4  13  -4   39.98    1.75
   5 -13   4   14.75    1.07
  -5  13  -4   17.84    1.18
   6 -13   4   16.75    1.15
  -6  13  -4   16.07    1.19
   7 -13   4   69.56    2.48
  -7  13  -4   75.97    2.72
  -8  13  -4   83.71    2.99
  -9  13  -4   19.34    1.42
 -10  13  -4   17.88    1.39
 -11  13  -4   28.65    1.78
 -12  13  -4    1.05    0.60
 -13  13  -4   11.75    1.39
 -14 -13  -4    3.60    0.68
 -14  13  -4    3.47    0.87
 -15 -13  -4   21.46    1.28
 -15  13  -4   22.10    1.74
 -16 -13  -4    0.82    0.44
 -16  13  -4    0.06    0.58
 -17  13  -4    2.02    0.78
 -18  13  -4    1.30    0.80
 -19  14   4    2.16    0.83
 -18  14   4    2.24    0.79
 -17  14   4   -0.51    0.50
 -16  14   4    3.80    0.96
 -15  14   4   10.87    1.37
 -14  14   4    0.17    0.50
 -13  14   4    4.26    0.86
 -12  14   4    0.61    0.52
 -11 -14   4    0.58    0.29
 -11  14   4    0.14    0.46
 -10 -14   4    7.36    0.65
 -10  14   4    6.78    1.01
  -9 -14   4    0.31    0.24
  -9  14   4   -0.35    0.32
  -8 -14   4    2.14    0.40
  -8  14   4    3.06    0.65
  -7 -14   4   13.23    0.87
  -7  14   4   14.15    1.15
  -6 -14   4   30.62    1.30
  -6  14   4   30.44    1.61
   5 -14  -4    1.24    0.46
  -5 -14   4    1.41    0.40
  -5  14   4    1.34    0.47
  -4 -14   4  120.40    3.18
   4 -14  -4  123.95    3.44
  -4  14   4  113.57    3.48
   3 -14  -4    4.60    0.69
  -3 -14   4    6.44    0.70
   3  14  -4    6.56    0.67
  -3  14   4    5.69    0.78
  -2 -14   4   34.17    1.47
   2 -14  -4   35.21    1.59
  -2  14   4   37.98    1.66
   2  14  -4   36.82    1.44
   1 -14  -4    1.53    0.41
  -1 -14   4    0.97    0.36
   1  14  -4    1.01    0.34
  -1  14   4    0.54    0.34
   0 -14  -4    2.26    0.51
   0 -14   4    1.45    0.41
   0  14   4    2.48    0.52
   0  14  -4    2.36    0.47
  -1 -14  -4   -0.12    0.25
   1 -14   4    0.58    0.34
   1  14   4   -0.22    0.26
  -1  14  -4    0.17    0.29
   2 -14   4   89.33    2.82
  -2 -14  -4   93.45    2.81
   2  14   4   93.76    2.82
  -2  14  -4   93.14    2.83
   3 -14   4  116.38    3.31
   3  14   4  108.86    3.15
  -3  14  -4  111.84    3.30
   4 -14   4   14.93    1.06
  -4  14  -4   14.01    1.08
   5 -14   4    1.41    0.45
  -5  14  -4    1.37    0.46
   6 -14   4    6.25    0.84
  -6  14  -4    6.34    0.87
   7 -14   4   18.89    1.27
  -7  14  -4   20.37    1.38
  -8  14  -4   10.01    1.16
  -9  14  -4   84.95    3.15
 -10  14  -4    5.15    0.90
 -11  14  -4    1.39    0.61
 -12  14  -4   -0.24    0.47
 -13  14  -4    0.09    0.52
 -14  14  -4    0.38    0.59
 -15 -14  -4   -0.12    0.39
 -15  14  -4    0.22    0.56
 -16 -14  -4    3.29    0.62
 -16  14  -4    3.61    0.92
 -17  14  -4    0.54    0.66
 -18  14  -4    3.89    1.01
 -18  15   4    3.79    0.96
 -17  15   4    9.59    1.37
 -16  15   4    5.42    1.12
 -15  15   4    2.32    0.82
 -14  15   4    0.33    0.58
 -13  15   4    0.15    0.53
 -12  15   4    1.36    0.61
 -11 -15   4    7.89    0.70
 -11  15   4    9.88    1.21
 -10 -15   4   -0.33    0.24
 -10  15   4    0.14    0.53
  -9 -15   4    0.45    0.27
  -9  15   4   -0.34    0.39
  -8 -15   4    0.05    0.23
  -8  15   4    0.33    0.38
  -7 -15   4   32.09    1.35
  -7  15   4   29.85    1.68
  -6 -15   4    0.23    0.31
   6 -15  -4   -0.06    0.36
  -6  15   4    0.67    0.46
  -5 -15   4    0.37    0.31
   5 -15  -4    0.75    0.41
  -5  15   4    0.47    0.42
   4 -15  -4   -0.06    0.28
  -4 -15   4   -0.25    0.23
  -4  15   4   -0.53    0.27
  -3 -15   4    4.77    0.63
   3 -15  -4    3.26    0.59
  -3  15   4    4.96    0.77
   2 -15  -4    2.02    0.49
  -2 -15   4    2.11    0.48
  -2  15   4    3.29    0.61
   2  15  -4    3.43    0.53
  -1 -15   4    3.75    0.61
   1 -15  -4    4.24    0.68
  -1  15   4    4.96    0.73
   1  15  -4    4.39    0.62
   0 -15  -4   30.77    1.50
   0 -15   4   28.44    1.45
   0  15   4   28.51    1.46
   0  15  -4   28.97    1.40
   1 -15   4   61.90    2.26
  -1 -15  -4   64.30    2.28
  -1  15  -4   62.83    2.22
   1  15   4   65.38    2.29
   2 -15   4  158.29    4.21
  -2 -15  -4  154.98    4.13
  -2  15  -4  152.95    4.15
   2  15   4  156.31    4.14
   3 -15   4   96.32    3.06
  -3  15  -4   97.27    3.06
   3  15   4  100.91    2.98
   4 -15   4    0.36    0.34
  -4  15  -4   -0.12    0.32
   5 -15   4   21.89    1.35
  -5  15  -4   18.66    1.31
   6 -15   4    1.25    0.46
  -6  15  -4    1.28    0.50
   7 -15   4    4.27    0.75
  -7  15  -4    4.57    0.81
  -8  15  -4   77.60    2.96
  -9  15  -4   35.34    2.00
 -10  15  -4   15.86    1.55
 -11  15  -4    1.26    0.64
 -12  15  -4    0.43    0.50
 -13  15  -4    2.63    0.82
 -14  15  -4    0.97    0.60
 -15 -15  -4    5.19    0.79
 -15  15  -4    5.56    1.10
 -16 -15  -4    1.76    0.53
 -16  15  -4    1.26    0.75
 -17  15  -4    5.45    1.14
 -18  15  -4    4.57    1.14
 -18  16   4   24.09    1.95
 -17  16   4   12.40    1.55
 -16  16   4   13.25    1.60
 -15  16   4   12.42    1.55
 -14  16   4   -0.07    0.57
 -13  16   4   26.33    1.86
 -12  16   4    0.13    0.47
 -11 -16   4    4.70    0.57
 -11  16   4    4.53    0.90
 -10 -16   4    0.04    0.28
 -10  16   4    0.03    0.52
  -9 -16   4   21.20    1.10
  -9  16   4   20.20    1.54
  -8 -16   4    4.44    0.60
  -8  16   4    4.47    0.88
  -7 -16   4    0.80    0.34
   7 -16  -4    0.09    0.34
  -7  16   4    0.40    0.41
  -6 -16   4    0.53    0.33
   6 -16  -4    0.98    0.44
  -6  16   4    0.34    0.42
  -5 -16   4    4.13    0.62
   5 -16  -4    4.22    0.70
  -5  16   4    3.78    0.74
  -4 -16   4    0.42    0.31
   4 -16  -4    0.65    0.38
  -4  16   4    0.87    0.43
  -3 -16   4    2.73    0.54
   3 -16  -4    2.20    0.53
  -3  16   4    1.88    0.55
  -2 -16   4    9.81    0.95
   2 -16  -4   11.86    1.13
  -2  16   4   11.77    1.13
   2  16  -4   10.69    0.85
   1 -16  -4    2.44    0.55
  -1 -16   4    3.05    0.57
  -1  16   4    3.14    0.61
   1  16  -4    3.29    0.57
   0 -16   4   29.79    1.52
   0 -16  -4   29.42    1.52
   0  16   4   29.76    1.53
   0  16  -4   30.69    1.48
   1 -16   4   -0.62    0.33
  -1 -16  -4   -0.41    0.35
  -1  16  -4   -0.43    0.37
   1  16   4   -0.06    0.36
   2 -16   4  120.67    3.61
  -2 -16  -4  118.24    3.52
  -2  16  -4  128.11    3.61
   2  16   4  124.51    3.57
   3 -16   4   83.42    2.87
  -3 -16  -4   88.74    2.82
  -3  16  -4   87.89    2.91
   4 -16   4   69.20    2.58
  -4  16  -4   77.50    2.71
   5 -16   4    4.08    0.73
  -5  16  -4    5.42    0.83
   6 -16   4   20.96    1.37
  -6  16  -4   20.54    1.41
   7 -16   4    3.30    0.71
  -7  16  -4    2.83    0.68
  -8  16  -4   42.73    2.18
  -9  16  -4   64.51    2.79
 -10  16  -4   26.96    1.83
 -11  16  -4    1.43    0.71
 -12  16  -4    7.15    1.17
 -13  16  -4   -0.22    0.47
 -14  16  -4    1.91    0.76
 -15 -16  -4    0.25    0.44
 -15  16  -4    0.01    0.58
 -16  16  -4   -0.59    0.55
 -17  16  -4   -0.11    0.67
 -18  16  -4   -0.30    0.70
 -18  17   4   12.04    1.57
 -17  17   4   24.34    1.98
 -16  17   4    0.47    0.71
 -15  17   4    3.72    0.96
 -14  17   4    0.84    0.68
 -13  17   4    0.34    0.60
 -12  17   4    0.97    0.65
 -11 -17   4    4.10    0.59
 -11  17   4    3.18    0.82
 -10 -17   4    2.71    0.54
 -10  17   4    3.11    0.83
  -9 -17   4    9.86    0.88
  -9  17   4    8.67    1.21
  -8 -17   4    6.70    0.76
  -8  17   4    9.74    1.25
  -7 -17   4    3.83    0.60
   7 -17  -4    3.81    0.75
  -7  17   4    3.05    0.74
  -6 -17   4   16.31    1.06
   6 -17  -4   16.58    1.44
  -6  17   4   13.84    1.37
   5 -17  -4    1.67    0.55
  -5 -17   4    2.75    0.54
  -5  17   4    2.80    0.67
  -4 -17   4   -0.18    0.25
   4 -17  -4    0.04    0.30
  -4  17   4   -0.19    0.34
   3 -17  -4   41.31    1.88
  -3 -17   4   40.39    1.76
  -3  17   4   39.42    1.91
  -2 -17   4   14.83    1.09
   2 -17  -4   14.09    1.14
  -2  17   4   12.79    1.23
  -1 -17   4    2.24    0.53
   1 -17  -4    1.21    0.45
  -1  17   4    0.88    0.45
   1  17  -4    1.14    0.43
   0 -17  -4   19.55    1.31
   0 -17   4   18.92    1.29
   0  17  -4   18.66    1.21
   0  17   4   19.97    1.29
  -1 -17  -4   78.55    2.71
   1 -17   4   79.66    2.74
   1  17   4   72.58    2.62
  -1  17  -4   76.47    2.64
  -2 -17  -4   85.43    2.85
   2 -17   4   82.40    2.87
   2  17   4   83.92    2.81
  -2  17  -4   84.64    2.87
   3 -17   4   44.46    2.00
  -3  17  -4   43.23    1.96
   4 -17   4    3.90    0.73
  -4  17  -4    5.76    0.83
   5 -17   4   16.73    1.26
  -5  17  -4   15.19    1.25
   6 -17   4   16.20    1.26
  -6  17  -4   17.96    1.36
   7 -17   4   26.47    1.61
  -7  17  -4   25.53    1.67
  -8  17  -4   15.08    1.53
  -9  17  -4    5.48    1.01
 -10  17  -4    0.00    0.51
 -11  17  -4   30.55    2.02
 -12  17  -4    0.58    0.62
 -13  17  -4   16.83    1.77
 -14  17  -4    1.21    0.74
 -15 -17  -4    0.16    0.45
 -15  17  -4   -0.29    0.56
 -16  17  -4    0.37    0.68
 -17  17  -4   -0.11    0.65
 -17  18   4    6.55    1.25
 -16  18   4    4.46    1.06
 -15  18   4    1.21    0.72
 -14  18   4   -0.38    0.52
 -13  18   4   -0.01    0.55
 -12 -18   4    0.94    0.37
 -12  18   4    0.81    0.63
 -11 -18   4   -0.52    0.29
 -11  18   4    0.05    0.52
 -10 -18   4    1.04    0.48
 -10  18   4    0.73    0.61
  -9 -18   4   10.11    0.96
  -9  18   4   11.13    1.36
  -8 -18   4   11.24    1.01
  -8  18   4    9.88    1.28
  -7 -18   4    3.44    0.62
  -7  18   4    2.01    0.69
   6 -18  -4   28.18    1.70
  -6 -18   4   25.94    1.39
  -6  18   4   26.51    1.69
   5 -18  -4   12.38    1.26
  -5 -18   4   10.81    1.02
  -5  18   4   13.59    1.37
  -4 -18   4    0.66    0.37
   4 -18  -4    0.41    0.40
  -4  18   4    0.03    0.40
   3 -18  -4    5.64    0.85
  -3 -18   4    6.09    0.83
  -3  18   4    6.33    0.94
   2 -18  -4  158.34    4.44
  -2 -18   4  157.31    4.33
  -2  18   4  152.79    4.46
   1 -18  -4    3.16    0.68
  -1 -18   4    3.96    0.70
  -1  18   4    4.06    0.77
   0 -18  -4   20.94    1.35
   0 -18   4   21.49    1.37
   0  18  -4   19.32    1.27
   0  18   4   19.28    1.31
  -1 -18  -4    0.55    0.46
   1 -18   4    0.94    0.48
   1  18   4   -0.02    0.38
  -1  18  -4    0.12    0.38
  -2 -18  -4    5.66    0.82
   2 -18   4    6.33    0.89
  -2  18  -4    6.96    0.90
   3 -18   4   20.75    1.38
  -3 -18  -4   21.40    1.35
  -3  18  -4   19.72    1.38
   4 -18   4    7.52    0.97
  -4  18  -4    7.40    0.99
   5 -18   4    6.10    0.92
  -5  18  -4    6.28    0.93
   6 -18   4    0.90    0.52
  -6  18  -4    0.89    0.54
   7 -18   4   -0.14    0.42
  -7  18  -4    0.06    0.47
  -8  18  -4    0.08    0.49
  -9  18  -4    0.33    0.56
 -10  18  -4    3.28    0.91
 -11  18  -4    4.76    1.03
 -12  18  -4    0.15    0.56
 -13  18  -4    2.27    0.84
 -14  18  -4   30.34    2.20
 -15  18  -4    0.07    0.68
 -16  18  -4    0.22    0.75
 -17  18  -4    0.87    0.82
 -17  19   4    5.61    1.18
 -16  19   4    0.44    0.69
 -15  19   4   -0.07    0.61
 -14  19   4    5.98    1.13
 -13  19   4    9.11    1.40
 -12 -19   4    4.36    0.62
 -12  19   4    4.13    1.00
 -11 -19   4    3.16    0.59
 -11  19   4    4.54    0.98
 -10 -19   4    0.18    0.45
 -10  19   4    0.68    0.64
  -9 -19   4    9.74    0.97
  -9  19   4    9.10    1.28
  -8 -19   4    0.20    0.36
  -8  19   4   -0.58    0.44
  -7 -19   4    7.18    0.87
  -7  19   4    8.29    1.14
  -6 -19   4    8.30    0.95
   6 -19  -4    9.31    1.19
  -6  19   4    5.35    0.99
  -5 -19   4    0.06    0.33
   5 -19  -4   -0.06    0.42
  -5  19   4   -0.24    0.47
  -4 -19   4    3.36    0.66
   4 -19  -4    2.63    0.67
  -4  19   4    2.17    0.68
  -3 -19   4   70.76    2.61
   3 -19  -4   71.61    2.75
  -3  19   4   76.90    2.89
  -2 -19   4   38.57    1.89
   2 -19  -4   36.69    1.98
  -2  19   4   37.39    1.97
   1 -19  -4   27.32    1.63
  -1 -19   4   27.23    1.56
  -1  19   4   28.08    1.64
   0 -19   4    5.56    0.85
   0 -19  -4    5.37    0.81
   0  19   4    4.97    0.82
   0  19  -4    5.45    0.81
   1 -19   4    0.22    0.39
  -1 -19  -4   -0.04    0.34
   1  19   4   -0.14    0.36
  -1  19  -4    0.47    0.41
   2 -19   4   14.46    1.35
  -2 -19  -4   14.04    1.32
  -2  19  -4   12.35    1.23
  -3 -19  -4    0.90    0.42
   3 -19   4   -0.19    0.35
  -3  19  -4    0.79    0.48
   4 -19   4   15.71    1.47
  -4  19  -4   14.37    1.38
   5 -19   4   18.33    1.61
  -5  19  -4   13.75    1.43
   6 -19   4    1.42    0.62
  -6  19  -4    0.33    0.55
   7 -19   4    1.38    0.56
  -7  19  -4    0.95    0.58
  -8  19  -4    0.30    0.52
  -9  19  -4    7.11    1.14
 -10  19  -4   11.21    1.42
 -11  19  -4    4.13    1.01
 -12  19  -4    0.84    0.73
 -13  19  -4   54.16    2.94
 -14  19  -4    4.50    1.13
 -15  19  -4   -1.05    0.59
 -16  19  -4   -0.41    0.74
 -17  20   4    1.78    0.92
 -16  20   4    0.27    0.71
 -15  20   4    0.69    0.73
 -14  20   4    1.80    0.86
 -13  20   4   46.49    2.70
 -12  20   4   11.09    1.50
 -11 -20   4    0.12    0.35
 -11  20   4    0.14    0.55
 -10 -20   4    2.13    0.59
 -10  20   4    2.65    0.83
  -9 -20   4    6.16    0.83
  -9  20   4    6.54    1.16
  -8 -20   4    8.04    0.93
  -8  20   4    6.26    1.10
  -7 -20   4    0.32    0.38
  -7  20   4   -0.11    0.46
  -6 -20   4    5.76    0.83
   6 -20  -4    4.48    0.85
  -6  20   4    5.05    0.99
   5 -20  -4    0.98    0.54
  -5 -20   4    0.49    0.43
  -5  20   4   -0.66    0.47
  -4 -20   4   -0.19    0.33
   4 -20  -4    0.48    0.47
  -4  20   4   -0.48    0.42
   3 -20  -4   55.51    2.48
  -3 -20   4   61.44    2.41
  -3  20   4   56.09    2.52
  -2 -20   4  125.33    3.80
   2 -20  -4  118.97    3.88
  -2  20   4  122.35    3.95
   1 -20  -4   34.99    1.89
  -1 -20   4   36.40    1.86
  -1  20   4   35.07    1.90
   0 -20   4    0.32    0.41
   0 -20  -4    0.99    0.46
   0  20   4    1.36    0.55
   1 -20   4   12.63    1.27
  -1 -20  -4   15.69    1.42
  -1  20  -4   17.36    1.29
   2 -20   4    7.93    1.03
  -2 -20  -4    7.06    0.99
  -2  20  -4    7.84    1.05
   3 -20   4    8.16    1.08
  -3 -20  -4    8.78    1.05
  -3  20  -4    8.40    1.11
   4 -20   4    1.17    0.61
  -4  20  -4    1.14    0.60
   5 -20   4   21.91    1.63
  -5  20  -4   25.20    1.77
   6 -20   4   48.86    2.35
  -6  20  -4   47.43    2.44
   7 -20   4    9.31    1.22
  -7  20  -4    7.12    1.15
  -8  20  -4    2.36    0.77
  -9  20  -4   22.52    1.81
 -10  20  -4   -0.01    0.50
 -11  20  -4    0.35    0.61
 -12  20  -4    2.71    0.93
 -13  20  -4    9.96    1.51
 -14  20  -4   11.19    1.63
 -15  20  -4    4.68    1.21
 -16  20  -4    0.02    0.79
 -16  21   4    0.92    0.78
 -15  21   4    2.25    0.94
 -14  21   4   21.56    2.11
 -13  21   4   11.18    1.63
 -12  21   4   26.03    2.08
 -11 -21   4    1.64    0.49
 -11  21   4    1.04    0.71
 -10 -21   4    0.92    0.48
 -10  21   4    1.54    0.70
  -9 -21   4    0.78    0.42
  -9  21   4    0.69    0.64
  -8 -21   4    0.37    0.40
  -8  21   4   -0.05    0.53
  -7 -21   4    6.07    0.85
  -7  21   4    4.84    0.97
  -6 -21   4    0.23    0.38
   6 -21  -4    0.22    0.45
  -6  21   4   -0.66    0.42
   5 -21  -4    0.21    0.43
  -5 -21   4   -0.22    0.31
  -5  21   4   -0.09    0.50
  -4 -21   4    7.05    0.96
   4 -21  -4   11.38    1.31
  -4  21   4    7.98    1.15
   3 -21  -4   16.85    1.56
  -3 -21   4   17.33    1.34
  -3  21   4   16.86    1.59
  -2 -21   4   93.48    3.26
   2 -21  -4   93.92    3.35
  -2  21   4   96.73    3.44
   1 -21  -4    3.65    0.76
  -1 -21   4    3.11    0.72
  -1  21   4    3.69    0.82
   0 -21   4    3.42    0.75
   0 -21  -4    3.31    0.73
   0  21   4    2.47    0.70
   1 -21   4    4.87    0.87
  -1 -21  -4    3.86    0.81
   2 -21   4   58.33    2.51
  -2 -21  -4   56.66    2.45
  -2  21  -4   56.77    2.49
  -3 -21  -4    2.55    0.67
   3 -21   4    2.57    0.74
  -3  21  -4    3.03    0.78
   4 -21   4    9.44    1.22
  -4  21  -4   10.54    1.30
   5 -21   4   53.58    2.54
  -5  21  -4   55.82    2.63
   6 -21   4    2.72    0.82
  -6  21  -4    3.36    0.91
   7 -21   4    8.15    1.16
  -7  21  -4    6.75    1.18
  -8  21  -4   10.07    1.38
  -9  21  -4   -0.04    0.53
 -10  21  -4    2.30    0.83
 -11  21  -4    0.16    0.62
 -12  21  -4    4.42    1.09
 -13  21  -4    5.64    1.25
 -14  21  -4    6.25    1.29
 -15  21  -4   -0.02    0.77
 -16  21  -4    2.76    1.08
 -16  22   4    2.70    1.05
 -15  22   4    0.13    0.75
 -14  22   4    0.10    0.73
 -13  22   4   41.36    2.64
 -12  22   4   10.53    1.59
 -11 -22   4    1.46    0.53
 -11  22   4    1.07    0.78
 -10 -22   4    3.42    0.70
 -10  22   4    4.52    1.05
  -9 -22   4    3.07    0.70
  -9  22   4    2.78    0.92
  -8 -22   4    1.14    0.51
  -8  22   4    1.22    0.71
  -7 -22   4   18.04    1.34
  -7  22   4   16.95    1.73
  -6 -22   4   14.92    1.24
   6 -22  -4   18.22    1.73
  -6  22   4   18.27    1.83
   5 -22  -4    6.39    1.07
  -5 -22   4    5.39    0.88
  -5  22   4    7.78    1.21
   4 -22  -4    1.58    0.62
  -4 -22   4    1.00    0.52
  -4  22   4    2.07    0.73
  -3 -22   4    8.44    1.09
   3 -22  -4    9.47    1.23
  -3  22   4    9.55    1.23
   2 -22  -4    2.43    0.74
  -2 -22   4    0.85    0.55
  -2  22   4    1.49    0.65
  -1 -22   4   28.66    1.76
   1 -22  -4   31.32    1.87
  -1  22   4   32.36    1.90
   0 -22  -4    0.27    0.41
   0 -22   4    0.01    0.41
  -1 -22  -4    2.15    0.66
   1 -22   4    1.35    0.56
  -2 -22  -4    0.99    0.51
   2 -22   4    0.72    0.50
  -2  22  -4    0.62    0.53
   3 -22   4   18.58    1.72
  -3  22  -4   18.94    1.52
   4 -22   4    0.32    0.54
  -4  22  -4    0.61    0.61
   5 -22   4    5.68    1.03
  -5  22  -4    4.57    0.96
   6 -22   4   28.40    1.91
  -6  22  -4   29.15    1.98
  -7  22  -4    6.60    1.19
  -8  22  -4    4.42    1.02
  -9  22  -4    6.27    1.21
 -10  22  -4   -0.05    0.62
 -11  22  -4    0.49    0.78
 -12  22  -4   -0.27    0.69
 -13  22  -4    7.12    1.34
 -14  22  -4    0.07    0.72
 -15  22  -4    0.15    0.78
 -15  23   4    1.45    0.95
 -14  23   4    4.07    1.08
 -13  23   4    1.12    0.87
 -12  23   4    2.79    1.03
 -11 -23   4    2.87    0.65
 -11  23   4    1.10    0.81
 -10 -23   4   -0.49    0.40
 -10  23   4    0.30    0.65
  -9 -23   4   12.85    1.29
  -9  23   4   16.44    1.84
  -8 -23   4   35.56    1.89
  -8  23   4   33.67    2.25
  -7 -23   4   18.51    1.45
  -7  23   4   21.66    2.06
  -6 -23   4    7.78    1.06
   6 -23  -4    6.51    1.18
  -6  23   4    6.51    1.21
  -5 -23   4   -0.21    0.41
   5 -23  -4    0.27    0.53
  -5  23   4    0.03    0.55
  -4 -23   4    2.22    0.65
   4 -23  -4    1.92    0.72
  -4  23   4    1.16    0.67
   3 -23  -4    1.55    0.66
  -3 -23   4    1.16    0.58
  -3  23   4    1.49    0.67
   2 -23  -4    7.31    1.17
  -2 -23   4    5.93    0.97
  -2  23   4    7.39    1.13
   1 -23  -4    6.89    1.06
  -1 -23   4    4.28    0.85
   0 -23  -4   -0.53    0.40
   0 -23   4   -0.15    0.39
  -1 -23  -4    2.22    0.69
   1 -23   4    0.64    0.51
  -2 -23  -4    2.64    0.71
   2 -23   4    2.89    0.77
   3 -23   4    3.97    0.90
  -3  23  -4    5.65    1.00
   4 -23   4    1.04    0.59
  -4  23  -4    1.03    0.60
   5 -23   4    5.06    1.02
  -5  23  -4    6.95    1.15
   6 -23   4    4.46    1.00
  -6  23  -4    4.78    1.07
  -7  23  -4    0.84    0.69
  -8  23  -4    4.42    1.08
  -9  23  -4   19.33    2.04
 -10  23  -4    6.14    1.26
 -11  23  -4    0.21    0.72
 -12  23  -4    4.48    1.18
 -13  23  -4    9.12    1.59
 -14  23  -4    1.59    0.92
 -15  23  -4    0.15    0.73
 -15  24   4    0.18    0.82
 -14  24   4    3.21    1.08
 -13  24   4    0.66    0.75
 -12  24   4   -0.03    0.72
 -11 -24   4    1.39    0.51
 -11  24   4    0.22    0.74
 -10 -24   4    0.58    0.51
 -10  24   4    0.62    0.75
  -9 -24   4   20.36    1.52
  -9  24   4   17.96    1.96
  -8 -24   4    1.80    0.68
  -8  24   4    2.36    0.93
  -7 -24   4   82.74    3.12
  -7  24   4   82.36    3.62
  -6 -24   4   22.18    1.60
  -6  24   4   19.53    1.96
   5 -24  -4    0.25    0.58
  -5 -24   4    0.71    0.53
  -5  24   4    1.41    0.78
  -4 -24   4   -0.01    0.47
   4 -24  -4    0.54    0.58
  -4  24   4   -0.54    0.54
   3 -24  -4   16.14    1.65
  -3 -24   4   16.59    1.57
  -3  24   4   16.51    1.67
   2 -24  -4   10.67    1.35
  -2 -24   4   12.06    1.37
  -2  24   4   13.82    1.55
  -1 -24   4    0.75    0.53
   1 -24  -4    0.56    0.53
   0 -24   4    0.24    0.50
   0 -24  -4    0.56    0.56
  -1 -24  -4   12.06    1.38
   1 -24   4   10.62    1.32
  -2 -24  -4   12.48    1.41
   2 -24   4   11.97    1.42
   3 -24   4    0.70    0.54
   4 -24   4    0.87    0.60
  -4  24  -4    1.56    0.72
   5 -24   4    1.22    0.63
  -5  24  -4    0.27    0.56
   6 -24   4    7.61    1.25
  -6  24  -4    9.43    1.38
  -7  24  -4    0.35    0.64
  -8  24  -4    0.21    0.66
  -9  24  -4    2.04    0.96
 -10  24  -4   10.65    1.72
 -11  24  -4    1.23    0.90
 -12  24  -4    2.05    1.02
 -13  24  -4    1.20    0.85
 -14  24  -4    1.60    0.91
 -14  25   4    0.62    0.84
 -13  25   4   -0.40    0.71
 -12  25   4    0.69    0.87
 -11 -25   4    0.86    0.52
 -11  25   4    0.88    0.80
 -10 -25   4    2.70    0.69
 -10  25   4    3.33    1.07
  -9 -25   4    9.62    1.20
  -9  25   4   10.46    1.60
  -8 -25   4   75.31    3.01
  -8  25   4   75.21    3.57
  -7 -25   4    3.55    0.84
  -7  25   4    3.17    1.05
  -6 -25   4   14.01    1.44
  -6  25   4   11.41    1.55
   5 -25  -4    0.20    0.53
  -5 -25   4    0.04    0.45
  -5  25   4   -0.23    0.59
   4 -25  -4    3.48    0.92
  -4 -25   4    4.15    0.87
  -4  25   4    6.17    1.16
   3 -25  -4    5.49    1.07
  -3 -25   4    7.47    1.13
  -3  25   4    6.24    1.16
  -2 -25   4    3.36    0.81
   2 -25  -4    3.50    0.89
   1 -25  -4    1.59    0.67
  -1 -25   4    1.91    0.72
   0 -25   4    0.84    0.60
   0 -25  -4    2.47    0.81
   1 -25   4   12.96    1.55
  -1 -25  -4   10.23    1.36
   2 -25   4   17.21    1.74
   3 -25   4    3.53    0.92
   4 -25   4    1.77    0.72
   5 -25   4    1.65    0.71
  -5  25  -4    2.43    0.82
   6 -25   4   -0.36    0.52
  -6  25  -4    0.00    0.55
  -7  25  -4   10.95    1.54
  -8  25  -4    0.55    0.73
  -9  25  -4    3.82    1.07
 -10  25  -4   14.74    1.88
 -11  25  -4    1.44    0.96
 -12  25  -4   -0.42    0.71
 -13  25  -4    2.43    1.02
 -14  25  -4    1.37    0.96
 -14  26   4    5.77    1.40
 -13  26   4    2.04    1.01
 -12  26   4   15.19    1.93
 -11 -26   4    0.18    0.50
 -11  26   4    0.34    0.81
 -10 -26   4    2.01    0.69
 -10  26   4    1.96    0.95
  -9 -26   4   24.35    1.68
  -9  26   4   26.67    2.51
  -8 -26   4    9.75    1.24
  -8  26   4    9.60    1.57
  -7 -26   4   20.72    1.63
  -7  26   4   20.35    2.10
  -6 -26   4    0.25    0.50
  -6  26   4    0.07    0.65
   5 -26  -4    0.06    0.57
  -5 -26   4    1.14    0.62
  -5  26   4    0.77    0.74
  -4 -26   4    2.11    0.71
   4 -26  -4    0.46    0.58
  -4  26   4    0.39    0.64
   3 -26  -4    1.86    0.80
  -3 -26   4    1.16    0.62
  -2 -26   4   -0.20    0.49
   2 -26  -4   -0.11    0.49
   1 -26  -4    1.31    0.71
  -1 -26   4    1.56    0.72
   0 -26   4   -0.45    0.49
   0 -26  -4   -0.06    0.53
   1 -26   4   10.75    1.42
  -1 -26  -4   10.87    1.44
   2 -26   4    1.47    0.79
   3 -26   4    8.09    1.30
   4 -26   4   18.48    1.83
   5 -26   4    2.86    0.90
   6 -26   4   -0.12    0.60
  -6  26  -4   -0.75    0.54
  -7  26  -4    3.31    1.04
  -8  26  -4    7.61    1.39
  -9  26  -4   11.30    1.69
 -10  26  -4    9.32    1.58
 -11  26  -4    1.63    0.97
 -12  26  -4    0.11    0.78
 -13  26  -4    0.28    0.82
 -13  27   4   -0.41    0.80
 -12  27   4    3.26    1.18
 -11 -27   4   12.77    1.35
 -11  27   4    9.20    1.63
 -10 -27   4    0.30    0.55
 -10  27   4    1.16    0.93
  -9 -27   4    3.27    0.82
  -9  27   4    1.54    0.94
  -8 -27   4    4.03    0.91
  -8  27   4    4.18    1.16
  -7 -27   4    1.61    0.73
  -7  27   4    1.75    0.94
  -6 -27   4    0.70    0.57
  -6  27   4    0.25    0.75
  -5 -27   4    0.10    0.54
  -5  27   4    0.10    0.67
   4 -27  -4    7.68    1.30
  -4 -27   4    7.68    1.17
  -3 -27   4    2.52    0.80
   3 -27  -4    2.25    0.80
   2 -27  -4    0.94    0.68
  -2 -27   4    1.40    0.70
  -1 -27   4    1.60    0.75
   1 -27  -4    1.39    0.76
   0 -27   4    1.46    0.73
   0 -27  -4    2.84    0.92
   1 -27   4   14.33    1.67
   2 -27   4   22.30    2.11
   3 -27   4   14.67    1.74
   4 -27   4    0.78    0.63
   5 -27   4   -0.14    0.57
  -7  27  -4    9.15    1.52
  -8  27  -4    6.63    1.37
  -9  27  -4   -0.11    0.71
 -10  27  -4    0.77    0.85
 -11  27  -4    1.56    0.96
 -12  27  -4    4.66    1.33
 -13  27  -4    1.16    0.98
 -12  28   4    7.98    1.58
 -11  28   4    6.55    1.49
 -10 -28   4    2.81    0.79
 -10  28   4    1.58    1.06
  -9 -28   4    0.60    0.60
  -9  28   4   -0.35    0.81
  -8 -28   4    1.96    0.78
  -8  28   4    2.06    1.01
  -7 -28   4    5.13    1.04
  -7  28   4    7.08    1.40
  -6 -28   4   -0.30    0.57
  -6  28   4    0.48    0.79
  -5 -28   4    2.21    0.86
  -4 -28   4    3.42    0.94
  -3 -28   4   50.67    2.67
  -2 -28   4    1.11    0.71
  -1 -28   4    5.39    1.08
   0 -28   4    2.18    0.79
   1 -28   4    0.03    0.55
   2 -28   4    2.40    0.83
   3 -28   4    5.40    1.14
   4 -28   4    2.11    0.84
   5 -28   4   -0.50    0.59
  -8  28  -4    2.02    1.01
  -9  28  -4    0.99    0.92
 -10  28  -4    1.72    1.01
 -11  28  -4   -0.30    0.81
 -12  28  -4    0.93    1.00
 -12  29   4   15.30    2.10
 -11  29   4    3.38    1.26
 -10 -29   4    0.09    0.54
 -10  29   4    0.10    0.87
  -9 -29   4    0.24    0.60
  -9  29   4    0.44    0.86
  -8 -29   4    9.45    1.33
  -8  29   4    5.57    1.37
  -7 -29   4    0.70    0.65
  -7  29   4   -0.56    0.74
  -6 -29   4    3.31    0.95
  -5 -29   4    3.82    1.02
  -4 -29   4   49.71    2.69
  -3 -29   4    1.52    0.79
  -2 -29   4    9.81    1.43
  -1 -29   4    1.37    0.74
   0 -29   4    1.08    0.72
   1 -29   4    3.67    1.02
   2 -29   4    0.44    0.63
   3 -29   4    1.11    0.75
   4 -29   4   -0.10    0.63
   5 -29   4    0.91    0.83
 -10  29  -4    1.56    1.00
 -11  29  -4    0.01    0.90
 -11  30   4    5.21    1.41
 -10 -30   4    1.64    0.72
 -10  30   4    2.35    1.17
  -9 -30   4   -0.37    0.50
  -9  30   4    0.66    0.96
  -8 -30   4    0.36    0.60
  -7 -30   4    7.22    1.23
  -6 -30   4   -0.77    0.46
  -5 -30   4    5.74    1.20
  -4 -30   4    3.02    0.97
  -3 -30   4   57.98    2.98
  -2 -30   4    0.40    0.64
  -1 -30   4    1.74    0.81
   0 -30   4    5.64    1.21
   1 -30   4    0.09    0.65
   2 -30   4    0.13    0.68
   3 -30   4   -0.88    0.58
   4 -30   4   12.44    1.75
   5 -30   4    0.35    0.79
 -10  31   4   -1.17    0.87
  -9 -31   4   -0.15    0.59
  -8 -31   4    0.63    0.64
  -7 -31   4    0.62    0.64
  -6 -31   4    0.50    0.66
  -5 -31   4   -0.01    0.65
  -4 -31   4   19.33    2.05
  -3 -31   4    0.68    0.75
  -2 -31   4    3.90    1.16
  -1 -31   4    4.69    1.19
   0 -31   4    3.02    1.13
   1 -31   4    1.86    0.93
   2 -31   4    0.30    0.84
   3 -31   4   10.45    1.68
   4 -31   4   -0.31    0.70
  -8 -32   4    3.63    1.08
  -7 -32   4    1.63    0.81
  -6 -32   4   -0.38    0.59
  -5 -32   4    2.89    0.95
  -4 -32   4    1.04    0.84
  -3 -32   4    2.39    1.01
  -2 -32   4    0.03    0.75
  -1 -32   4    0.52    0.84
   0 -32   4    0.44    0.83
   1 -32   4    6.92    1.54
   2 -32   4    3.08    1.14
   3 -32   4    0.93    0.95
   4 -32   4    5.04    1.37
  -6 -33   4   -0.65    0.62
  -5 -33   4    0.00    0.69
  -4 -33   4    0.61    0.71
  -2 -33   4    0.00    0.70
  -1 -33   4    0.36    0.79
   0 -33   4    1.85    1.02
   1 -33   4   14.89    2.03
   2 -33   4    4.01    1.30
   3 -33   4    1.07    1.00
   4 -33   4   -0.12    0.78
  -4 -34   4    1.63    0.86
  -3 -34   4    2.57    0.99
  -2 -34   4    5.81    1.37
  -1 -34   4    0.26    0.81
   0 -34   4    5.44    1.33
   1 -34   4    5.67    1.37
   2 -34   4    5.23    1.40
   3 -34   4   -0.24    0.82
  -1 -35   4    7.00    1.50
   0 -35   4    0.02    0.74
   1 -35   4    3.43    1.16
   2 -35   4   -0.29    0.81
   3 -35   4    7.60    1.53
 -16   0   5   -0.06    0.31
 -15   0   5   -0.19    0.30
 -14   0   5   -0.11    0.23
 -13   0   5   35.86    1.30
 -12   0   5   -0.09    0.24
 -11   0   5    8.75    0.60
 -10   0   5    0.52    0.24
  -9   0   5   54.96    1.55
  -8   0   5   -0.07    0.14
  -8   0   5   -0.08    0.15
  -7   0   5    8.89    0.51
  -6   0   5    0.00    0.15
  -5   0   5   32.57    1.07
  -4   0   5   -0.26    0.15
  -3   0   5   61.29    1.68
   3   0  -5   64.36    1.60
   2   0  -5   -0.10    0.13
  -2   0   5    0.65    0.22
   1   0  -5   19.90    0.78
  -1   0   5   17.76    0.80
   0   0  -5   -0.03    0.15
   0   0   5    0.12    0.16
   1   0   5   12.82    0.66
  -1   0  -5   12.33    0.66
  -2   0  -5   -0.15    0.17
   2   0   5    0.04    0.17
  -3   0  -5  935.56   18.09
   3   0   5  918.15   17.99
  -4   0  -5    0.06    0.20
   4   0   5   -0.23    0.17
  -5   0  -5   99.33    2.63
   5   0   5  101.10    2.52
   6   0   5    0.25    0.20
  -6   0  -5    0.06    0.20
  -7   0  -5   13.45    0.83
  -8   0  -5    0.19    0.23
  -9   0  -5   65.07    2.14
 -10   0  -5   -0.10    0.27
 -11   0  -5    4.61    0.67
 -12   0  -5   -0.24    0.30
 -13   0  -5    0.74    0.42
 -14   0  -5    0.29    0.38
 -15   0  -5    0.12    0.36
 -16   0  -5   -0.76    0.36
 -17   0  -5    1.65    0.60
 -18   0  -5   -0.27    0.39
 -19   0  -5    1.10    0.56
 -20   0  -5   -0.01    0.52
 -17   1   5    1.67    0.43
 -16   1   5   21.82    1.10
 -15   1   5   -0.51    0.30
 -14  -1   5    0.78    0.29
 -14   1   5    0.43    0.31
 -13  -1   5   -0.10    0.22
 -13   1   5   -0.23    0.25
 -12  -1   5   39.30    1.25
 -12   1   5   37.47    1.37
 -11  -1   5    3.08    0.37
 -11   1   5    2.90    0.42
 -10  -1   5  167.61    3.68
 -10   1   5  169.32    3.84
  -9  -1   5    6.23    0.49
  -9  -1   5    6.63    0.48
  -9   1   5    7.10    0.55
  -8  -1   5    0.34    0.18
  -8   1   5    0.70    0.22
  -8   1   5    0.85    0.24
  -7  -1   5    9.47    0.52
  -7   1   5    9.80    0.57
  -6  -1   5    0.89    0.24
  -6   1   5    1.35    0.27
  -5  -1   5  202.77    4.31
  -5   1   5  205.80    4.39
  -4  -1   5    6.38    0.46
  -4   1   5    7.67    0.52
  -3  -1   5   22.48    0.85
  -3   1   5   21.80    0.87
  -2  -1   5   21.47    0.84
  -2   1   5   20.33    0.85
   2   1  -5   18.79    0.74
  -1  -1   5  327.43    6.58
  -1   1   5  320.15    6.61
   1   1  -5  312.61    6.49
   0  -1   5    6.02    0.48
   0   1   5    6.24    0.50
   0   1  -5    7.05    0.49
   1  -1   5    0.22    0.17
   1   1   5    0.15    0.17
  -1   1  -5    0.04    0.16
   2  -1   5  291.20    6.13
   2   1   5  295.92    6.15
  -2   1  -5  293.83    6.17
   3  -1   5   89.78    2.28
  -3   1  -5   88.34    2.33
   3   1   5   87.26    2.27
   4  -1   5  153.13    3.54
  -4  -1  -5  154.57    3.64
  -4   1  -5  156.26    3.65
   4   1   5  154.86    3.53
  -5  -1  -5    1.79    0.37
   5  -1   5    1.51    0.32
   5   1   5    1.86    0.32
  -5   1  -5    1.37    0.32
   6  -1   5   49.34    1.52
  -6  -1  -5   47.88    1.63
   6   1   5   48.10    1.48
  -6   1  -5   50.98    1.68
  -7  -1  -5    1.10    0.33
   7  -1   5    2.21    0.36
  -7   1  -5    1.31    0.35
  -8  -1  -5    2.17    0.42
  -8   1  -5    1.69    0.39
  -9  -1  -5   11.78    0.85
  -9   1  -5   10.59    0.83
 -10  -1  -5   47.05    1.76
 -10   1  -5   41.91    1.73
 -11  -1  -5    0.18    0.29
 -11   1  -5   -0.17    0.28
 -12  -1  -5    0.04    0.30
 -12   1  -5    0.07    0.33
 -13  -1  -5    0.05    0.35
 -13   1  -5    0.78    0.41
 -14  -1  -5    1.01    0.47
 -14   1  -5    2.48    0.60
 -15  -1  -5    0.60    0.40
 -15   1  -5    0.61    0.45
 -16  -1  -5    1.54    0.58
 -16   1  -5    1.48    0.64
 -17  -1  -5    2.85    0.71
 -17   1  -5    2.16    0.69
 -18  -1  -5    5.15    0.83
 -18   1  -5    4.68    0.84
 -19  -1  -5    0.03    0.47
 -19   1  -5    0.03    0.48
 -20   1  -5   10.23    1.18
 -17   2   5    0.62    0.38
 -16   2   5    1.61    0.49
 -15   2   5   -0.08    0.34
 -14   2   5    1.49    0.40
 -13   2   5    5.23    0.62
 -12  -2   5    0.77    0.24
 -12   2   5    1.07    0.35
 -11  -2   5   40.14    1.19
 -11   2   5   39.08    1.42
 -10  -2   5   47.18    1.32
 -10   2   5   47.63    1.56
  -9  -2   5   33.62    1.04
  -9   2   5   34.43    1.24
  -8  -2   5    8.00    0.48
  -8   2   5    7.07    0.55
  -7  -2   5    0.74    0.19
  -7   2   5    0.64    0.22
  -6  -2   5  309.51    6.37
  -6   2   5  323.76    6.57
  -5  -2   5   61.03    1.61
  -5   2   5   65.21    1.75
  -4  -2   5  101.90    2.37
  -4   2   5  101.28    2.48
  -3  -2   5   50.30    1.41
  -3   2   5   50.83    1.50
  -2  -2   5  491.35    9.86
  -2   2   5  497.70    9.97
   2   2  -5  505.73    9.78
  -1  -2   5    3.67    0.41
  -1   2   5    3.06    0.40
   1   2  -5    3.90    0.41
   0  -2   5  169.52    3.73
   0   2   5  171.54    3.81
   0   2  -5  163.89    3.69
   1  -2   5   12.67    0.67
  -1   2  -5   12.35    0.66
   1   2   5   12.71    0.69
   2  -2   5   85.44    2.23
  -2   2  -5   91.36    2.28
   2   2   5   84.85    2.24
   3  -2   5  259.17    5.55
  -3   2  -5  260.78    5.63
   3   2   5  263.76    5.56
   4  -2   5   10.53    0.65
   4   2   5    8.25    0.59
  -4   2  -5    8.09    0.63
   5  -2   5    6.71    0.55
  -5   2  -5    4.24    0.52
   5   2   5    5.58    0.52
   6  -2   5    1.87    0.34
  -6  -2  -5    1.78    0.36
  -6   2  -5    1.35    0.34
   6   2   5    1.97    0.34
  -7  -2  -5    1.03    0.32
   7  -2   5    0.82    0.26
  -7   2  -5    1.44    0.36
  -8  -2  -5    9.28    0.73
  -8   2  -5    8.00    0.77
  -9  -2  -5   14.08    0.92
  -9   2  -5   15.65    1.00
 -10  -2  -5   50.76    1.87
 -10   2  -5   54.27    1.99
 -11  -2  -5    0.27    0.29
 -12  -2  -5    5.76    0.76
 -12   2  -5    6.57    0.85
 -13  -2  -5    5.05    0.73
 -13   2  -5    5.37    0.79
 -14  -2  -5   27.26    1.45
 -14   2  -5   26.70    1.52
 -15  -2  -5    8.43    0.97
 -15   2  -5    6.94    0.94
 -16  -2  -5   21.30    1.38
 -16   2  -5   20.79    1.46
 -17  -2  -5    4.04    0.77
 -17   2  -5    5.19    0.92
 -18  -2  -5    0.02    0.42
 -18   2  -5   -0.12    0.44
 -19  -2  -5    2.66    0.66
 -19   2  -5    4.52    0.88
 -20   2  -5    4.01    0.83
 -18   3   5    1.08    0.46
 -17   3   5    6.24    0.77
 -16   3   5    0.08    0.39
 -15   3   5    3.52    0.61
 -14   3   5    1.49    0.44
 -13   3   5   -0.02    0.27
 -12   3   5   15.18    0.94
 -11   3   5    4.90    0.59
 -10   3   5   43.69    1.53
  -9  -3   5   14.76    0.61
  -9   3   5   14.76    0.84
  -8  -3   5   14.52    0.61
  -8   3   5   14.68    0.79
  -7  -3   5    6.32    0.41
  -7   3   5    5.84    0.54
  -6  -3   5   30.23    0.94
  -6   3   5   28.23    1.09
  -5  -3   5  365.01    7.16
  -5   3   5  348.98    7.34
  -4  -3   5   12.81    0.60
  -4   3   5   11.50    0.66
  -3  -3   5   84.78    2.07
  -3   3   5   86.08    2.21
  -2  -3   5  168.72    3.77
   2   3  -5  175.72    3.71
  -2   3   5  178.16    3.93
  -1  -3   5  582.96   11.69
   1   3  -5  599.45   11.64
  -1   3   5  599.86   11.83
   0  -3   5    3.35    0.38
   0   3  -5    2.86    0.35
   0   3   5    3.65    0.45
   1  -3   5   19.05    0.83
  -1   3  -5   18.44    0.82
   1   3   5   19.86    0.88
   2  -3   5   12.91    0.69
  -2   3  -5   14.54    0.74
   2   3   5   13.07    0.73
   3  -3   5   89.72    2.36
  -3   3  -5   94.56    2.44
   3   3   5   92.32    2.36
   4  -3   5   60.26    1.79
  -4   3  -5   63.32    1.89
   4   3   5   63.34    1.78
   5  -3   5    3.00    0.42
  -5   3  -5    3.02    0.45
   5   3   5    3.01    0.39
   6  -3   5    0.67    0.24
  -6   3  -5    0.35    0.26
   7  -3   5   12.74    0.76
  -7  -3  -5   14.93    0.87
  -7   3  -5   13.84    0.88
  -8  -3  -5   25.09    1.19
  -8   3  -5   26.14    1.26
  -9  -3  -5    4.59    0.61
  -9   3  -5    4.20    0.62
 -10  -3  -5    6.90    0.76
 -10   3  -5    5.26    0.71
 -11  -3  -5    1.89    0.47
 -11   3  -5    2.46    0.55
 -12  -3  -5    1.07    0.42
 -12   3  -5    1.74    0.50
 -13  -3  -5    1.78    0.50
 -13   3  -5    2.20    0.58
 -14  -3  -5    0.82    0.43
 -14   3  -5    0.72    0.47
 -15  -3  -5    0.35    0.40
 -15   3  -5    0.20    0.43
 -16  -3  -5   22.82    1.42
 -16   3  -5   21.24    1.51
 -17  -3  -5   16.81    1.23
 -17   3  -5   16.55    1.50
 -18  -3  -5    6.48    0.87
 -18   3  -5    7.83    1.09
 -19  -3  -5   -0.28    0.42
 -19   3  -5   -0.66    0.44
 -20   3  -5    1.28    0.67
 -18   4   5    2.99    0.64
 -17   4   5    9.25    0.95
 -16   4   5    1.87    0.53
 -15   4   5    7.80    0.87
 -14   4   5    4.71    0.66
 -13   4   5    8.94    0.87
 -12   4   5   11.45    0.87
 -11   4   5   20.35    1.08
 -10   4   5    3.90    0.53
  -9   4   5    4.89    0.57
  -8  -4   5   34.94    1.01
  -8   4   5   37.91    1.38
  -7  -4   5    4.78    0.37
  -7   4   5    3.91    0.49
  -6  -4   5   93.49    2.15
  -6  -4   5   95.46    2.18
  -6   4   5   96.68    2.49
  -5  -4   5   61.93    1.54
  -5  -4   5   61.20    1.56
  -5   4   5   59.23    1.77
  -4  -4   5   23.04    0.83
  -4   4   5   23.78    0.97
  -3  -4   5   31.81    1.02
  -3   4   5   30.16    1.14
  -2  -4   5  165.21    3.65
  -2   4   5  169.43    3.83
   2   4  -5  163.19    3.55
  -1  -4   5  151.81    3.44
  -1   4   5  153.92    3.58
   1   4  -5  154.68    3.40
   0  -4   5    4.34    0.45
   0   4  -5    4.96    0.47
   0   4   5    4.42    0.49
   1  -4   5   27.83    1.03
  -1   4  -5   26.38    1.02
   1   4   5   25.14    1.04
   2  -4   5    2.47    0.37
  -2   4  -5    2.14    0.36
   2   4   5    2.23    0.37
   3  -4   5    0.16    0.21
   3   4   5   -0.02    0.21
  -3   4  -5    0.23    0.22
   4  -4   5   15.19    0.81
  -4   4  -5   15.17    0.84
   4   4   5   14.88    0.77
   5  -4   5   73.25    2.08
   5   4   5   70.56    1.96
  -5   4  -5   75.33    2.21
   6  -4   5    7.50    0.67
  -6   4  -5    8.53    0.78
   7  -4   5   23.23    1.04
  -7   4  -5   22.81    1.15
  -8  -4  -5   58.02    1.95
  -8   4  -5   60.80    2.08
  -9  -4  -5    1.09    0.38
  -9   4  -5    1.07    0.39
 -10  -4  -5   10.34    0.85
 -10   4  -5   11.88    1.07
 -11  -4  -5   -0.16    0.26
 -11   4  -5   -0.20    0.31
 -12   4  -5    0.77    0.46
 -13  -4  -5    0.11    0.34
 -13   4  -5   -0.06    0.34
 -14  -4  -5   19.98    1.25
 -14   4  -5   20.72    1.41
 -15  -4  -5   11.19    1.08
 -15   4  -5   12.03    1.24
 -16  -4  -5   20.02    1.33
 -16   4  -5   22.65    1.55
 -17  -4  -5   15.30    1.17
 -17   4  -5   11.64    1.33
 -18  -4  -5    0.09    0.42
 -18   4  -5   -0.07    0.54
 -19   4  -5    2.55    0.74
 -20   4  -5    7.11    1.05
 -19   5   5    4.18    0.77
 -18   5   5    2.57    0.66
 -17   5   5    2.84    0.63
 -16   5   5    4.35    0.73
 -15   5   5   18.07    1.21
 -14   5   5   25.37    1.38
 -13   5   5   -0.08    0.33
 -12   5   5   38.20    1.60
 -11   5   5   44.08    1.70
 -10   5   5   15.81    0.96
  -9   5   5    1.54    0.38
  -8  -5   5    6.99    0.40
  -8   5   5    8.40    0.75
  -7  -5   5   65.48    1.60
  -7  -5   5   65.38    1.58
  -7   5   5   68.03    2.01
  -6  -5   5   73.37    1.79
  -6  -5   5   74.60    1.78
  -6   5   5   75.82    2.14
  -5  -5   5    5.02    0.40
  -5  -5   5    5.80    0.41
  -5   5   5    5.26    0.56
  -4  -5   5    0.55    0.18
  -4   5   5    0.08    0.19
  -3  -5   5    1.24    0.25
  -3   5   5    2.01    0.37
  -2  -5   5  187.67    4.05
   2   5  -5  182.24    3.95
  -2   5   5  186.81    4.23
  -1  -5   5    1.44    0.29
  -1   5   5    1.17    0.31
   1   5  -5    2.67    0.36
   0  -5   5   74.57    2.00
   0   5   5   74.51    2.10
   0   5  -5   75.96    1.98
   1  -5   5   58.91    1.73
  -1   5  -5   63.03    1.76
   1   5   5   56.90    1.77
   2  -5   5    7.19    0.56
   2   5   5    7.66    0.67
  -2   5  -5    7.38    0.58
   3  -5   5   15.16    0.81
  -3   5  -5   13.06    0.79
   3   5   5   15.76    0.81
   4  -5   5    5.86    0.59
  -4   5  -5    4.64    0.55
   4   5   5    5.08    0.52
   5  -5   5  128.90    3.26
  -5   5  -5  132.51    3.40
   5   5   5  136.15    3.17
   6  -5   5   16.21    0.88
  -6   5  -5   16.25    0.96
   7  -5   5   28.19    1.20
  -7   5  -5   27.37    1.30
  -8   5  -5   64.32    2.21
  -9  -5  -5   41.69    1.61
  -9   5  -5   37.94    1.67
 -10  -5  -5   14.28    0.96
 -10   5  -5   14.58    1.05
 -11  -5  -5   16.59    1.05
 -11   5  -5   14.99    1.15
 -12  -5  -5   11.51    0.93
 -12   5  -5   10.89    1.12
 -13  -5  -5    2.27    0.53
 -13   5  -5    2.45    0.66
 -14  -5  -5    1.35    0.48
 -14   5  -5    1.86    0.58
 -15  -5  -5    0.39    0.41
 -15   5  -5    0.43    0.50
 -16  -5  -5    6.63    0.88
 -16   5  -5    7.43    1.06
 -17  -5  -5    2.10    0.58
 -17   5  -5    2.42    0.75
 -18  -5  -5    1.86    0.58
 -18   5  -5    2.31    0.76
 -19   5  -5    1.35    0.66
 -20   5  -5    2.40    0.75
 -19   6   5   10.17    1.13
 -18   6   5   15.21    1.35
 -17   6   5    0.57    0.45
 -16   6   5    5.28    0.81
 -15   6   5   19.66    1.32
 -14   6   5    3.04    0.64
 -13   6   5    1.93    0.54
 -12   6   5    6.79    0.82
 -11   6   5    4.19    0.66
 -10   6   5   40.33    1.63
  -9   6   5    2.61    0.48
  -8  -6   5   10.46    0.47
  -8  -6   5    9.96    0.47
  -8   6   5   10.81    0.79
  -7  -6   5   95.97    2.16
  -7  -6   5   93.97    2.15
  -7   6   5   94.29    2.64
  -6  -6   5  139.13    2.96
  -6  -6   5  133.50    2.96
  -6   6   5  133.05    3.38
  -5  -6   5   61.34    1.61
  -5  -6   5   66.64    1.62
  -5   6   5   59.10    1.89
  -4  -6   5   13.61    0.63
  -4   6   5   13.49    0.79
  -3  -6   5    4.33    0.42
  -3   6   5    4.34    0.51
  -2  -6   5    2.26    0.33
  -2   6   5    3.14    0.45
   2   6  -5    2.15    0.30
  -1  -6   5  365.44    7.69
  -1   6   5  384.96    7.91
   1   6  -5  378.74    7.64
   0  -6   5  118.46    2.90
   0   6   5  118.61    3.01
   0   6  -5  119.26    2.87
  -1   6  -5    4.31    0.47
   1   6   5    5.35    0.57
   2  -6   5    0.48    0.24
   2   6   5    0.17    0.21
  -2   6  -5    0.44    0.23
   3  -6   5   81.41    2.28
  -3   6  -5   82.96    2.33
   3   6   5   83.44    2.27
   4  -6   5  213.00    4.82
  -4   6  -5  213.80    4.92
   4   6   5  210.98    4.73
   5  -6   5   39.19    1.42
   5   6   5   37.76    1.31
  -5   6  -5   36.42    1.47
   6  -6   5   14.59    0.87
  -6   6  -5   16.46    0.98
   7  -6   5   61.59    1.97
  -7   6  -5   62.55    2.13
  -8   6  -5   97.46    2.93
  -9   6  -5    4.37    0.69
 -10  -6  -5    0.53    0.33
 -10   6  -5    0.22    0.37
 -11  -6  -5   23.28    1.25
 -11   6  -5   24.76    1.47
 -12  -6  -5   23.49    1.28
 -12   6  -5   22.39    1.47
 -13  -6  -5    1.46    0.47
 -13   6  -5    1.21    0.52
 -14  -6  -5    0.90    0.43
 -14   6  -5    0.56    0.49
 -15  -6  -5    1.77    0.54
 -15   6  -5    2.56    0.69
 -16  -6  -5    0.19    0.46
 -16   6  -5    0.64    0.53
 -17  -6  -5    3.22    0.65
 -17   6  -5    4.37    0.95
 -18  -6  -5    2.12    0.57
 -18   6  -5    1.96    0.76
 -19   6  -5    0.32    0.54
 -19   7   5   22.40    1.55
 -18   7   5   13.89    1.37
 -17   7   5    0.21    0.45
 -16   7   5    0.09    0.41
 -15   7   5   10.60    1.12
 -14   7   5   13.49    1.25
 -13   7   5    0.07    0.37
 -12   7   5    1.67    0.51
 -11   7   5   11.01    1.01
 -10   7   5   20.32    1.17
  -9   7   5   16.03    1.01
  -8  -7   5   34.59    0.99
  -8  -7   5   34.55    1.00
  -8   7   5   35.41    1.47
  -7  -7   5   47.80    1.28
  -7  -7   5   46.28    1.28
  -7   7   5   47.66    1.74
  -6  -7   5  307.27    6.16
  -6  -7   5  305.12    6.16
  -6   7   5  298.24    6.67
  -5  -7   5   62.27    1.67
  -5   7   5   66.60    2.03
  -4  -7   5    5.17    0.46
  -4   7   5    4.64    0.55
  -3  -7   5   51.73    1.50
  -3   7   5   50.28    1.68
  -2  -7   5   10.41    0.63
  -2   7   5    9.69    0.71
   2   7  -5   10.52    0.58
  -1  -7   5  176.62    4.04
   1   7  -5  181.06    3.98
  -1   7   5  177.29    4.19
   0  -7   5  258.55    5.56
   0   7  -5  260.74    5.52
   0   7   5  250.21    5.66
   1  -7   5    8.55    0.64
   1   7   5    9.20    0.68
  -1   7  -5    8.24    0.62
   2  -7   5   22.36    1.02
   2   7   5   23.48    1.07
  -2   7  -5   25.12    1.08
   3  -7   5   19.57    0.95
   3   7   5   16.11    0.89
  -3   7  -5   16.35    0.92
   4  -7   5   13.12    0.82
  -4   7  -5   12.51    0.83
   4   7   5   13.01    0.78
   5  -7   5   23.05    1.09
   5   7   5   22.81    0.99
  -5   7  -5   20.90    1.11
   6  -7   5    0.15    0.22
  -6   7  -5    0.03    0.25
   7  -7   5    5.46    0.65
  -7   7  -5    6.11    0.76
   8  -7   5    3.36    0.53
  -8   7  -5    2.92    0.57
  -9   7  -5   56.04    2.14
 -10   7  -5    0.96    0.43
 -11  -7  -5   29.09    1.41
 -11   7  -5   25.78    1.53
 -12  -7  -5   19.20    1.19
 -12   7  -5   19.19    1.40
 -13  -7  -5   13.65    1.01
 -13   7  -5   12.85    1.28
 -14  -7  -5    4.63    0.71
 -14   7  -5    4.72    0.86
 -15  -7  -5   -0.10    0.37
 -15   7  -5   -0.15    0.40
 -16  -7  -5    2.34    0.61
 -16   7  -5    3.38    0.83
 -17  -7  -5    0.31    0.45
 -17   7  -5    0.34    0.58
 -18  -7  -5    0.13    0.40
 -18   7  -5   -0.59    0.46
 -19   7  -5    1.30    0.66
 -20   8   5    6.87    1.02
 -19   8   5    2.62    0.76
 -18   8   5    9.18    1.19
 -17   8   5    5.87    0.94
 -16   8   5    1.61    0.59
 -15   8   5   -0.10    0.40
 -14   8   5    3.84    0.74
 -13   8   5    1.10    0.47
 -12   8   5    3.94    0.71
 -11   8   5    6.08    0.82
 -10   8   5    3.02    0.59
  -9  -8   5    0.33    0.16
  -9  -8   5    0.16    0.14
  -9   8   5    0.27    0.31
  -8  -8   5    2.10    0.28
  -8  -8   5    2.38    0.28
  -8   8   5    2.35    0.48
  -7  -8   5  265.05    5.53
  -7  -8   5  270.86    5.53
  -7   8   5  274.14    6.20
  -6  -8   5  130.69    2.96
  -6  -8   5  128.82    2.96
  -6   8   5  133.34    3.47
  -5  -8   5   18.85    0.79
  -5   8   5   17.58    0.99
  -4  -8   5   49.73    1.49
  -4   8   5   51.55    1.76
  -3  -8   5   21.96    0.92
  -3   8   5   22.60    1.08
  -2  -8   5   62.65    1.82
  -2   8   5   63.08    1.99
   2   8  -5   64.64    1.74
  -1  -8   5   91.39    2.44
   1   8  -5   92.86    2.38
  -1   8   5   94.88    2.61
   0  -8   5   11.64    0.74
   0   8   5   12.15    0.80
   0   8  -5   12.41    0.72
   1  -8   5   76.70    2.19
  -1   8  -5   79.75    2.21
   1   8   5   77.17    2.27
   2  -8   5    4.30    0.54
   2   8   5    4.28    0.54
  -2   8  -5    5.07    0.58
   3  -8   5    4.05    0.52
   3   8   5    4.38    0.54
  -3   8  -5    3.26    0.49
   4  -8   5   24.51    1.15
  -4   8  -5   22.27    1.14
   4   8   5   23.71    1.08
   5  -8   5    3.45    0.51
   5   8   5    3.51    0.48
  -5   8  -5    4.23    0.60
   6  -8   5    0.11    0.25
  -6   8  -5   -0.33    0.22
   7  -8   5    0.25    0.31
  -7   8  -5    0.06    0.32
   8  -8   5    1.54    0.42
  -8   8  -5    1.06    0.43
  -9   8  -5    6.18    0.84
 -10   8  -5    1.73    0.54
 -11   8  -5   44.32    2.03
 -12  -8  -5   90.05    2.85
 -12   8  -5   94.62    3.23
 -13  -8  -5    0.49    0.40
 -13   8  -5    1.04    0.55
 -14  -8  -5    0.09    0.34
 -14   8  -5   -0.20    0.44
 -15  -8  -5   23.47    1.35
 -15   8  -5   23.73    1.63
 -16  -8  -5    8.79    0.96
 -16   8  -5    6.89    1.11
 -17  -8  -5   -0.14    0.39
 -17   8  -5   -0.45    0.46
 -18   8  -5    1.53    0.71
 -19   8  -5    7.94    1.20
 -20   9   5   -0.22    0.53
 -19   9   5   17.81    1.61
 -18   9   5    2.78    0.81
 -17   9   5    1.56    0.67
 -16   9   5   -0.12    0.43
 -15   9   5    0.20    0.46
 -14   9   5   14.43    1.33
 -13   9   5    1.71    0.54
 -12   9   5    0.69    0.44
 -11   9   5   54.49    2.17
 -10   9   5    1.98    0.51
  -9  -9   5    3.93    0.36
  -9   9   5    3.13    0.58
  -8  -9   5   37.13    1.12
  -8   9   5   36.20    1.60
  -7  -9   5    4.64    0.44
  -7  -9   5    4.88    0.45
  -7   9   5    3.88    0.63
  -6  -9   5  132.71    2.98
  -6  -9   5  126.12    2.98
  -6   9   5  127.44    3.47
  -5  -9   5   18.72    0.82
  -5   9   5   18.37    1.05
  -4  -9   5    1.21    0.28
  -4   9   5    1.07    0.35
  -3  -9   5   22.57    0.97
  -3   9   5   23.42    1.14
  -2  -9   5    3.74    0.46
  -2   9   5    4.75    0.60
   2   9  -5    4.51    0.48
  -1  -9   5   29.55    1.18
   1   9  -5   31.56    1.16
  -1   9   5   29.22    1.27
   0  -9   5  196.93    4.53
   0   9   5  197.17    4.67
   0   9  -5  197.03    4.48
   1  -9   5   12.10    0.78
   1   9   5   10.53    0.77
  -1   9  -5   12.05    0.76
   2  -9   5    0.49    0.26
   2   9   5    1.86    0.40
  -2   9  -5    0.21    0.23
   3  -9   5   28.61    1.27
   3   9   5   31.15    1.29
  -3   9  -5   27.35    1.27
   4  -9   5   15.70    0.98
  -4   9  -5   18.15    1.07
   4   9   5   16.65    0.94
   5  -9   5   86.23    2.55
   5   9   5   83.99    2.36
  -5   9  -5   86.17    2.65
   6  -9   5    3.17    0.53
  -6   9  -5    3.76    0.64
   7  -9   5    2.07    0.48
  -7   9  -5    2.18    0.55
   8  -9   5   44.20    1.78
  -8   9  -5   44.56    1.93
  -9   9  -5    4.98    0.78
 -10   9  -5   10.49    1.12
 -11   9  -5   23.08    1.49
 -12  -9  -5    0.55    0.45
 -12   9  -5    0.14    0.48
 -13  -9  -5   41.26    1.81
 -13   9  -5   44.92    2.18
 -14  -9  -5    1.24    0.45
 -14   9  -5   -0.05    0.47
 -15  -9  -5    1.39    0.51
 -15   9  -5    1.99    0.72
 -16  -9  -5    5.51    0.79
 -16   9  -5    5.66    1.03
 -17  -9  -5    0.11    0.39
 -17   9  -5   -0.21    0.49
 -18   9  -5   -0.06    0.57
 -19   9  -5    2.41    0.80
 -20  10   5    4.28    0.92
 -19  10   5    3.45    0.88
 -18  10   5    1.51    0.65
 -17  10   5   -0.13    0.55
 -16  10   5    0.81    0.55
 -15  10   5   24.01    1.62
 -14  10   5    8.94    1.16
 -13  10   5   16.54    1.28
 -12  10   5   44.76    2.05
 -11  10   5   14.88    1.21
 -10  10   5   17.30    1.23
  -9 -10   5    5.66    0.43
  -9  10   5    5.15    0.74
  -8 -10   5    2.45    0.33
  -8  10   5    2.17    0.51
  -7 -10   5   69.36    1.81
  -7  10   5   61.84    2.27
  -6 -10   5    0.03    0.17
  -6  10   5    0.10    0.30
  -5 -10   5    0.82    0.26
  -5  10   5    0.68    0.33
  -4 -10   5    7.37    0.59
  -4  10   5    8.74    0.85
  -3 -10   5    0.11    0.19
  -3  10   5   -0.17    0.24
  -2 -10   5    9.94    0.68
  -2  10   5   10.79    0.80
   2  10  -5   10.38    0.65
  -1 -10   5   22.79    1.05
   1  10  -5   24.91    1.05
  -1  10   5   21.15    1.11
   0 -10   5   17.72    0.97
   0  10  -5   19.26    0.97
   0  10   5   21.85    1.12
   1 -10   5   88.99    2.53
   1  10   5   89.21    2.60
  -1  10  -5   89.07    2.50
   2 -10   5   -0.22    0.17
  -2  10  -5    0.20    0.24
   2  10   5    0.04    0.23
   3 -10   5   67.63    2.16
   3  10   5   64.06    2.09
  -3  10  -5   67.66    2.18
   4 -10   5  343.63    7.48
  -4  10  -5  343.16    7.57
   4  10   5  332.85    7.34
   5 -10   5    3.54    0.59
  -5  10  -5    3.53    0.61
   5  10   5    5.08    0.60
   6 -10   5    0.72    0.36
  -6  10  -5    1.14    0.43
   7 -10   5  114.62    3.25
  -7  10  -5  110.67    3.38
  -8  10  -5   12.01    1.18
  -9  10  -5    8.28    1.01
 -10  10  -5   -0.14    0.33
 -11  10  -5    0.91    0.50
 -12  10  -5   36.03    1.96
 -13 -10  -5    8.11    0.95
 -13  10  -5    4.69    0.90
 -14 -10  -5    1.99    0.55
 -14  10  -5    2.48    0.76
 -15 -10  -5   -0.21    0.37
 -15  10  -5    0.17    0.52
 -16 -10  -5    0.30    0.41
 -16  10  -5   -0.11    0.53
 -17 -10  -5    0.33    0.41
 -17  10  -5    0.41    0.58
 -18  10  -5    0.21    0.65
 -19  10  -5    1.29    0.74
 -20  11   5    0.28    0.61
 -19  11   5    0.55    0.62
 -18  11   5    5.60    1.04
 -17  11   5    8.04    1.18
 -16  11   5    0.66    0.56
 -15  11   5   -0.15    0.50
 -14  11   5   59.00    2.59
 -13  11   5    9.93    1.16
 -12  11   5   24.31    1.56
 -11  11   5  121.65    3.79
 -10 -11   5   36.18    1.15
 -10  11   5   35.26    1.78
  -9 -11   5    0.57    0.23
  -9  11   5    0.70    0.41
  -8 -11   5    0.60    0.23
  -8  11   5    0.79    0.41
  -7 -11   5    2.74    0.39
  -7  11   5    1.60    0.49
  -6 -11   5    0.12    0.21
  -6  11   5   -0.18    0.30
  -5 -11   5    0.58    0.27
  -5  11   5   -0.01    0.27
  -4 -11   5    6.88    0.64
  -4  11   5    7.58    0.80
  -3 -11   5    1.25    0.33
  -3  11   5    2.39    0.48
   3  11  -5    2.70    0.39
  -2 -11   5   38.19    1.43
   2  11  -5   36.84    1.33
  -2  11   5   40.89    1.61
  -1 -11   5    0.28    0.24
  -1  11   5   -0.02    0.25
   1  11  -5    0.08    0.21
   0 -11   5    0.10    0.24
   0  11   5    0.47    0.29
   0  11  -5   -0.01    0.24
   1 -11   5   -0.07    0.20
  -1  11  -5    0.27    0.24
   1  11   5    0.33    0.29
   2 -11   5    0.88    0.33
   2  11   5    1.51    0.41
  -2  11  -5    1.03    0.34
   3 -11   5   85.48    2.61
   3  11   5   88.21    2.59
  -3  11  -5   90.31    2.68
   4 -11   5   68.86    2.29
  -4  11  -5   68.51    2.34
   4  11   5   67.99    2.18
   5 -11   5  112.71    3.20
  -5  11  -5  110.24    3.27
   6 -11   5   36.75    1.61
  -6  11  -5   34.27    1.65
   7 -11   5   36.34    1.65
  -7  11  -5   33.83    1.73
  -8  11  -5   95.66    3.16
  -9  11  -5    2.54    0.63
 -10  11  -5    1.13    0.50
 -11  11  -5    1.66    0.62
 -12  11  -5    8.85    1.19
 -13 -11  -5    6.68    0.87
 -13  11  -5    6.87    1.07
 -14 -11  -5    2.46    0.61
 -14  11  -5    0.96    0.64
 -15 -11  -5    0.36    0.44
 -15  11  -5    0.41    0.59
 -16 -11  -5    2.49    0.60
 -16  11  -5    2.95    0.85
 -17 -11  -5    1.98    0.54
 -17  11  -5    2.87    0.84
 -18  11  -5   -0.96    0.50
 -19  11  -5    4.89    1.06
 -19  12   5    0.98    0.68
 -18  12   5    4.14    0.97
 -17  12   5    3.43    0.89
 -16  12   5    2.28    0.78
 -15  12   5   13.50    1.44
 -14  12   5   16.05    1.57
 -13  12   5   33.26    1.90
 -12  12   5   21.76    1.53
 -11  12   5   56.21    2.42
 -10 -12   5   55.48    1.60
 -10  12   5   58.22    2.38
  -9 -12   5    0.93    0.27
  -9  12   5    0.53    0.41
  -8 -12   5    4.82    0.51
  -8  12   5    3.84    0.68
  -7 -12   5   20.02    0.93
  -7  12   5   18.93    1.26
  -6 -12   5   -0.18    0.19
  -6  12   5   -0.13    0.30
  -5 -12   5   33.63    1.32
  -5  12   5   36.10    1.63
  -4 -12   5    9.41    0.74
  -4  12   5    9.83    0.94
  -3 -12   5   37.78    1.44
  -3  12   5   37.64    1.63
   3  12  -5   36.84    1.32
  -2 -12   5   15.40    0.91
   2  12  -5   14.93    0.83
  -2  12   5   14.46    0.98
  -1 -12   5    2.95    0.48
   1  12  -5    4.46    0.56
  -1  12   5    2.06    0.47
   0 -12   5    1.23    0.36
   0  12  -5    1.31    0.35
   0  12   5    1.33    0.40
   1 -12   5    8.06    0.77
  -1  12  -5    8.27    0.78
   1  12   5    8.49    0.84
   2 -12   5    0.58    0.31
  -2  12  -5    0.70    0.32
   2  12   5    0.73    0.36
   3 -12   5   14.39    0.99
   3  12   5   14.43    0.97
  -3  12  -5   13.46    0.98
   4 -12   5  189.88    4.69
   4  12   5  179.64    4.49
  -4  12  -5  185.84    4.72
   5 -12   5   30.09    1.46
  -5  12  -5   29.17    1.50
   6 -12   5   15.86    1.12
  -6  12  -5   17.83    1.21
   7 -12   5   68.60    2.43
  -7  12  -5   67.26    2.54
  -8  12  -5   12.20    1.22
  -9  12  -5   -0.01    0.41
 -10  12  -5   16.66    1.32
 -11  12  -5   30.75    1.83
 -12  12  -5    2.81    0.76
 -13  12  -5    0.67    0.60
 -14 -12  -5    0.65    0.45
 -14  12  -5    0.00    0.54
 -15 -12  -5   35.34    1.70
 -15  12  -5   34.55    2.14
 -16 -12  -5   12.12    1.10
 -16  12  -5   12.34    1.51
 -17  12  -5    2.16    0.83
 -18  12  -5   -0.38    0.65
 -19  13   5    0.64    0.68
 -18  13   5    3.08    0.90
 -17  13   5    6.20    1.10
 -16  13   5    1.13    0.67
 -15  13   5    8.74    1.21
 -14  13   5   10.93    1.31
 -13  13   5    0.62    0.55
 -12  13   5   26.99    1.69
 -11  13   5   41.95    2.09
 -10 -13   5   10.14    0.66
 -10  13   5    7.13    0.98
  -9 -13   5   10.29    0.70
  -9  13   5   11.10    1.15
  -8 -13   5    1.29    0.34
  -8  13   5    1.60    0.54
  -7 -13   5    6.99    0.66
  -7  13   5    6.20    0.90
  -6 -13   5   20.25    1.02
  -6  13   5   22.19    1.35
  -5 -13   5    6.81    0.68
  -5  13   5    7.31    0.90
  -4 -13   5   50.67    1.76
  -4  13   5   50.85    2.03
  -3 -13   5   29.77    1.30
   3  13  -5   28.34    1.18
  -3  13   5   29.45    1.48
  -2 -13   5   44.66    1.67
   2  13  -5   44.14    1.58
  -2  13   5   44.63    1.82
  -1 -13   5   29.15    1.32
   1  13  -5   27.74    1.25
  -1  13   5   29.44    1.42
   0 -13   5   53.99    1.93
   0  13  -5   51.95    1.85
   0  13   5   55.10    2.02
   1 -13   5   31.13    1.43
   1  13   5   29.32    1.45
  -1  13  -5   30.61    1.39
   2 -13   5   19.65    1.16
  -2  13  -5   17.49    1.10
   2  13   5   18.33    1.12
   3 -13   5   50.48    1.95
   3  13   5   48.19    1.87
  -3  13  -5   54.50    2.04
   4 -13   5   46.60    1.89
   4  13   5   49.28    1.84
  -4  13  -5   51.94    2.03
   5 -13   5    7.95    0.90
  -5  13  -5    7.08    0.85
   6 -13   5   34.17    1.64
  -6  13  -5   36.75    1.76
   7 -13   5   34.66    1.71
  -7  13  -5   38.10    1.85
  -8  13  -5    0.02    0.40
  -9  13  -5   34.61    1.90
 -10  13  -5    0.87    0.53
 -11  13  -5   20.69    1.56
 -12  13  -5   -0.05    0.47
 -13  13  -5    4.15    0.97
 -14 -13  -5    4.73    0.79
 -14  13  -5    4.13    0.95
 -15 -13  -5    9.48    1.04
 -15  13  -5   12.63    1.52
 -16 -13  -5    7.52    0.92
 -16  13  -5    6.63    1.18
 -17  13  -5   10.10    1.43
 -18  13  -5    2.68    0.92
 -19  14   5    0.61    0.71
 -18  14   5    0.16    0.62
 -17  14   5    1.35    0.72
 -16  14   5   22.14    1.74
 -15  14   5    6.10    1.07
 -13  14   5   -0.41    0.41
 -12  14   5    1.04    0.55
 -11 -14   5    2.33    0.39
 -11  14   5    2.60    0.72
 -10 -14   5   24.79    1.08
 -10  14   5   25.43    1.66
  -9 -14   5   29.51    1.20
  -9  14   5   27.78    1.70
  -8 -14   5    1.61    0.38
  -8  14   5    1.62    0.57
  -7 -14   5   25.66    1.17
  -7  14   5   28.49    1.59
  -6  14   5    6.25    0.89
  -5 -14   5   20.91    1.10
  -5  14   5   21.82    1.35
  -4 -14   5   45.54    1.69
  -4  14   5   43.29    1.92
  -3 -14   5   11.28    0.83
  -3  14   5   10.36    1.07
  -2 -14   5   20.25    1.14
  -2  14   5   19.83    1.24
   2  14  -5   21.12    1.07
  -1 -14   5   20.24    1.16
  -1  14   5   22.83    1.29
   1  14  -5   21.36    1.12
   0 -14   5  101.43    2.98
   0  14   5  100.90    3.06
   0  14  -5   97.09    2.87
   1 -14   5    0.43    0.36
  -1  14  -5    0.74    0.39
   1  14   5    1.31    0.44
   2 -14   5   26.61    1.41
   2  14   5   27.93    1.40
  -2  14  -5   26.16    1.40
   3 -14   5    0.82    0.42
   3  14   5    1.20    0.43
  -3  14  -5    1.64    0.49
   4 -14   5    2.14    0.50
  -4  14  -5    1.54    0.51
   5 -14   5    9.51    1.02
  -5  14  -5   10.56    1.11
   6 -14   5    0.50    0.39
  -6  14  -5    0.75    0.43
   7 -14   5    1.28    0.50
  -7  14  -5   -0.19    0.35
  -8  14  -5   63.98    2.65
  -9  14  -5   47.05    2.31
 -10  14  -5   14.97    1.50
 -11  14  -5    0.42    0.54
 -12  14  -5    5.12    0.99
 -13  14  -5   13.62    1.56
 -14 -14  -5    2.26    0.62
 -14  14  -5    2.28    0.75
 -15 -14  -5   24.64    1.49
 -15  14  -5   25.33    1.91
 -16 -14  -5   14.65    1.15
 -16  14  -5   15.80    1.75
 -17  14  -5    5.16    1.10
 -18  14  -5   -0.65    0.64
 -18  15   5    8.92    1.35
 -17  15   5    0.61    0.66
 -16  15   5   24.49    1.91
 -15  15   5   29.16    2.00
 -14  15   5   15.82    1.64
 -13  15   5   21.40    1.66
 -12  15   5    1.97    0.70
 -11 -15   5    0.31    0.29
 -11  15   5    0.10    0.48
 -10 -15   5   14.64    0.89
 -10  15   5   15.90    1.55
  -9 -15   5   54.96    1.81
  -9  15   5   53.78    2.46
  -8 -15   5   11.91    0.84
  -8  15   5   12.93    1.32
  -7 -15   5    6.79    0.71
  -7  15   5    4.93    0.84
  -6 -15   5    7.08    0.74
  -6  15   5    7.43    0.98
  -5 -15   5    1.36    0.39
  -5  15   5    0.70    0.45
  -4 -15   5    1.68    0.42
  -4  15   5    1.87    0.57
   3 -15  -5    4.56    0.70
  -3 -15   5    4.59    0.65
  -3  15   5    3.92    0.70
   2 -15  -5    6.82    0.84
  -2 -15   5    7.13    0.78
   2  15  -5    9.04    0.84
  -2  15   5    7.07    0.90
  -1 -15   5   19.76    1.18
   1  15  -5   20.97    1.16
  -1  15   5   18.84    1.25
   0 -15   5   12.28    0.98
   0  15   5    9.97    1.00
   0  15  -5   12.12    0.95
   1 -15   5   -0.33    0.31
   1  15   5    0.27    0.34
  -1  15  -5   -0.87    0.26
   2 -15   5   32.64    1.61
  -2  15  -5   32.52    1.62
   2  15   5   36.38    1.64
   3 -15   5   58.78    2.26
   3  15   5   57.50    2.16
  -3  15  -5   63.48    2.33
   4 -15   5    0.40    0.36
  -4  15  -5    0.34    0.37
   5 -15   5    0.20    0.37
  -5  15  -5    0.61    0.44
   6 -15   5    6.83    0.91
  -6  15  -5    6.06    0.89
   7 -15   5    0.71    0.44
  -7  15  -5    1.24    0.54
  -8  15  -5   61.38    2.65
  -9  15  -5   54.71    2.56
 -10  15  -5   33.63    2.02
 -11  15  -5    1.79    0.71
 -12  15  -5   15.21    1.61
 -13  15  -5    2.33    0.77
 -14  15  -5    1.05    0.66
 -15 -15  -5    6.96    0.95
 -15  15  -5    7.49    1.27
 -16 -15  -5    0.14    0.48
 -16  15  -5    0.49    0.66
 -17  15  -5    1.88    0.90
 -18  15  -5    0.64    0.76
 -18  16   5    5.16    1.12
 -17  16   5   25.95    1.99
 -16  16   5   16.12    1.75
 -15  16   5   23.36    1.86
 -14  16   5    1.27    0.73
 -13  16   5    6.07    1.08
 -12 -16   5    2.62    0.43
 -12  16   5    2.68    0.77
 -11 -16   5   13.97    0.88
 -11  16   5   13.44    1.44
 -10 -16   5   21.90    1.10
 -10  16   5   17.80    1.66
  -9 -16   5   10.14    0.83
  -9  16   5    8.15    1.16
  -8 -16   5   12.27    0.89
  -8  16   5   10.43    1.23
  -7 -16   5    2.71    0.52
  -7  16   5    2.43    0.66
  -6 -16   5   -0.14    0.26
  -6  16   5   -0.03    0.37
  -5 -16   5    8.11    0.84
  -5  16   5    5.98    0.89
  -4 -16   5    1.56    0.43
   4 -16  -5    2.01    0.55
  -4  16   5    1.71    0.57
  -3 -16   5    3.12    0.58
   3 -16  -5    2.25    0.55
  -3  16   5    1.34    0.53
   2 -16  -5   24.64    1.39
  -2 -16   5   24.93    1.33
  -2  16   5   19.97    1.35
  -1 -16   5    0.29    0.33
   1 -16  -5    1.52    0.46
  -1  16   5    0.09    0.35
   1  16  -5    0.83    0.37
   0 -16   5   12.40    1.02
   0  16   5   11.02    1.09
   0  16  -5   13.34    1.14
   1 -16   5    1.35    0.52
  -1  16  -5    1.67    0.53
   1  16   5    2.20    0.56
   2 -16   5  174.37    4.61
  -2  16  -5  166.32    4.51
   2  16   5  163.39    4.46
   3 -16   5    1.85    0.55
  -3  16  -5    1.61    0.52
   4 -16   5    2.58    0.60
  -4  16  -5    2.04    0.57
   5 -16   5    4.98    0.81
  -5  16  -5    6.07    0.88
   6 -16   5   48.61    2.12
  -6  16  -5   42.32    2.10
   7 -16   5   17.60    1.34
  -7  16  -5   17.72    1.40
  -8  16  -5   34.37    1.99
  -9  16  -5   52.06    2.51
 -10  16  -5    1.28    0.64
 -11  16  -5   45.00    2.43
 -12  16  -5    1.23    0.67
 -13  16  -5    0.33    0.56
 -14  16  -5   -0.41    0.55
 -15 -16  -5    0.63    0.52
 -15  16  -5    0.17    0.64
 -16 -16  -5    3.69    0.75
 -16  16  -5    4.45    1.09
 -17  16  -5    0.68    0.77
 -18  17   5   15.53    1.77
 -17  17   5    4.23    1.05
 -16  17   5   13.61    1.65
 -15  17   5   12.16    1.56
 -14  17   5    2.45    0.82
 -13  17   5    6.80    1.16
 -12 -17   5    4.68    0.60
 -12  17   5    4.19    0.92
 -11 -17   5    0.23    0.31
 -11  17   5   -0.29    0.47
 -10 -17   5    3.70    0.57
 -10  17   5    3.99    0.90
  -9 -17   5   34.27    1.48
  -9  17   5   34.60    2.05
  -8 -17   5    0.86    0.38
  -8  17   5    0.64    0.63
  -7 -17   5    0.17    0.31
  -7  17   5    0.43    0.51
  -6 -17   5    0.14    0.34
  -6  17   5    0.16    0.41
  -5 -17   5    5.78    0.78
  -5  17   5    5.23    0.90
  -4 -17   5   16.43    1.11
  -4  17   5   16.51    1.27
   3 -17  -5    5.68    0.84
  -3 -17   5    5.19    0.75
  -3  17   5    5.25    0.84
  -2 -17   5   46.09    1.93
  -2  17   5   43.50    2.02
   1 -17  -5    1.45    0.49
  -1 -17   5    0.92    0.44
   1  17  -5    2.03    0.49
  -1  17   5    2.27    0.59
   0 -17   5    5.61    0.81
   0  17  -5    7.44    0.89
   0  17   5    5.88    0.85
   1 -17   5   17.06    1.25
   1  17   5   19.86    1.33
  -1  17  -5   19.13    1.26
   2 -17   5    0.56    0.42
  -2  17  -5    0.20    0.42
   2  17   5    0.80    0.46
   3 -17   5   45.23    2.04
  -3  17  -5   44.47    2.02
   4 -17   5    2.91    0.65
  -4  17  -5    3.54    0.71
   5 -17   5    6.57    0.95
  -5  17  -5    5.36    0.84
   6 -17   5    2.31    0.65
  -6  17  -5    2.18    0.67
   7 -17   5   10.62    1.19
  -7  17  -5    8.96    1.17
  -8  17  -5   14.15    1.47
  -9  17  -5    7.74    1.15
 -10  17  -5   48.92    2.52
 -11  17  -5   24.93    1.89
 -12  17  -5    3.80    0.96
 -13  17  -5    4.79    1.07
 -14  17  -5    6.60    1.23
 -15 -17  -5    0.57    0.51
 -15  17  -5    1.20    0.72
 -16 -17  -5   -0.27    0.44
 -16  17  -5   -0.33    0.66
 -17  17  -5   -0.75    0.58
 -17  18   5   11.56    1.57
 -16  18   5    0.24    0.68
 -15  18   5    0.19    0.66
 -14  18   5    1.83    0.77
 -13  18   5    0.99    0.68
 -12 -18   5    0.17    0.29
 -12  18   5   -0.39    0.48
 -11 -18   5    4.71    0.64
 -11  18   5    3.72    0.91
 -10 -18   5    3.24    0.62
 -10  18   5    5.07    0.99
  -9 -18   5    9.14    0.91
  -9  18   5    6.46    1.09
  -8 -18   5    0.69    0.39
  -8  18   5    0.55    0.61
  -7 -18   5    3.52    0.64
  -7  18   5    5.22    0.95
  -6 -18   5    4.39    0.71
  -6  18   5    3.59    0.83
  -5 -18   5   78.69    2.69
  -5  18   5   83.17    3.10
   4 -18  -5    1.95    0.59
  -4 -18   5    2.77    0.59
  -4  18   5    2.16    0.64
  -3 -18   5   19.46    1.28
  -3  18   5   17.42    1.34
  -2 -18   5    6.14    0.89
   2 -18  -5    4.91    0.84
  -2  18   5    7.48    0.98
  -1 -18   5    2.66    0.63
   1 -18  -5    1.09    0.50
  -1  18   5    2.21    0.62
   0 -18   5   -0.28    0.29
   0  18   5    0.15    0.36
   0  18  -5   -0.09    0.32
   1 -18   5    0.70    0.41
   1  18   5    0.22    0.41
  -1  18  -5    0.36    0.38
   2 -18   5   29.10    1.63
  -2  18  -5   26.89    1.53
   3 -18   5   -0.23    0.35
  -3  18  -5   -0.04    0.33
   4 -18   5    5.74    0.87
  -4  18  -5    5.89    0.90
   5 -18   5    0.50    0.48
  -5  18  -5    0.24    0.49
   6 -18   5    2.41    0.67
  -6  18  -5    2.26    0.71
   7 -18   5    2.88    0.72
  -7  18  -5    3.76    0.82
  -8  18  -5    1.12    0.62
  -9  18  -5    5.78    1.07
 -10  18  -5   14.68    1.60
 -11  18  -5   44.68    2.52
 -12  18  -5   14.08    1.69
 -13  18  -5   24.99    2.00
 -14  18  -5   13.90    1.70
 -15 -18  -5   -0.18    0.43
 -15  18  -5   -1.11    0.58
 -16 -18  -5   -0.32    0.44
 -16  18  -5   -0.74    0.66
 -17  18  -5   12.02    1.70
 -17  19   5    2.52    0.96
 -16  19   5    0.45    0.72
 -15  19   5   -0.68    0.58
 -14  19   5    1.48    0.78
 -13  19   5    3.20    0.93
 -12 -19   5    5.37    0.68
 -12  19   5    5.67    1.12
 -11 -19   5   -0.23    0.33
 -11  19   5   -0.07    0.48
 -10 -19   5   -0.69    0.30
 -10  19   5   -0.21    0.48
  -9 -19   5    1.88    0.51
  -9  19   5    2.31    0.79
  -8 -19   5    5.14    0.73
  -8  19   5    2.86    0.83
  -7 -19   5    0.19    0.35
  -7  19   5    0.47    0.54
  -6 -19   5    3.32    0.66
  -6  19   5    3.76    0.86
  -5 -19   5    0.07    0.41
  -5  19   5   -0.63    0.46
  -4 -19   5   48.41    2.08
   4 -19  -5   47.07    2.20
  -4  19   5   52.10    2.40
  -3 -19   5   16.93    1.30
  -3  19   5   17.64    1.39
  -2 -19   5   56.76    2.35
  -2  19   5   54.74    2.41
  -1 -19   5    1.60    0.57
   1 -19  -5    0.69    0.50
  -1  19   5    2.59    0.68
   0 -19   5   12.22    1.23
   0  19  -5   10.89    1.12
   0  19   5   10.74    1.18
   1 -19   5    0.50    0.45
  -1  19  -5   -0.01    0.36
   1  19   5    0.74    0.47
   2 -19   5   13.78    1.33
  -2  19  -5   11.49    1.19
   3 -19   5   -0.25    0.34
  -3  19  -5    0.41    0.46
   4 -19   5   -0.35    0.38
  -4  19  -5   -0.24    0.40
   5 -19   5   -0.03    0.48
  -5  19  -5   -0.76    0.41
   6 -19   5    7.81    1.10
  -6  19  -5    8.06    1.14
   7 -19   5   13.21    1.38
  -7  19  -5   11.07    1.33
  -8  19  -5    0.27    0.51
  -9  19  -5    7.81    1.21
 -10  19  -5   13.62    1.58
 -11  19  -5    9.37    1.38
 -12  19  -5    1.36    0.74
 -13  19  -5   27.54    2.14
 -14  19  -5   15.08    1.82
 -15  19  -5    6.86    1.38
 -16  19  -5    2.09    0.98
 -17  20   5   -0.19    0.65
 -16  20   5    3.99    1.11
 -15  20   5   -0.09    0.67
 -14  20   5   14.65    1.77
 -13  20   5   11.75    1.59
 -12 -20   5    3.09    0.63
 -12  20   5    1.62    0.83
 -11 -20   5    0.76    0.43
 -11  20   5    0.96    0.68
 -10 -20   5    4.20    0.72
 -10  20   5    4.41    1.01
  -9 -20   5    7.83    0.91
  -9  20   5    5.72    1.07
  -8 -20   5   14.58    1.11
  -8  20   5   12.08    1.53
  -7 -20   5    0.20    0.36
  -7  20   5    0.00    0.50
  -6 -20   5    1.49    0.49
  -6  20   5   -0.20    0.51
  -5 -20   5   45.14    2.01
  -5  20   5   43.56    2.32
  -4 -20   5   27.75    1.58
  -4  20   5   25.06    1.75
  -3 -20   5    4.33    0.80
   3 -20  -5    5.74    0.96
  -3  20   5    4.16    0.84
   2 -20  -5   10.48    1.26
  -2 -20   5   11.28    1.20
  -2  20   5   11.59    1.29
   1 -20  -5    0.30    0.46
  -1 -20   5    0.02    0.42
  -1  20   5    0.65    0.52
   0 -20   5   -0.05    0.35
   0  20   5   -0.17    0.41
   1 -20   5    4.88    0.85
  -1  20  -5    5.22    0.87
   2 -20   5   39.79    2.03
  -2  20  -5   40.01    1.99
   3 -20   5    0.08    0.42
  -3  20  -5   -0.24    0.40
   4 -20   5   -0.17    0.44
  -4  20  -5    0.23    0.50
   5 -20   5   24.62    1.73
  -5  20  -5   27.85    1.84
   6 -20   5   70.71    2.90
  -6  20  -5   65.37    2.88
   7 -20   5    4.54    0.91
  -7  20  -5    4.81    1.01
  -8  20  -5   -0.15    0.47
  -9  20  -5   -0.31    0.48
 -10  20  -5    2.33    0.80
 -11  20  -5    6.19    1.19
 -12  20  -5    7.94    1.36
 -13  20  -5   14.81    1.78
 -14  20  -5   12.55    1.73
 -15  20  -5    0.23    0.76
 -16  20  -5    0.86    0.79
 -16  21   5    0.16    0.77
 -15  21   5   -0.03    0.68
 -14  21   5    1.32    0.83
 -13  21   5   32.34    2.33
 -12 -21   5   21.55    1.37
 -12  21   5   20.12    2.08
 -11 -21   5    0.50    0.42
 -11  21   5    0.32    0.59
 -10 -21   5    1.61    0.53
 -10  21   5    1.68    0.77
  -9 -21   5   29.64    1.58
  -9  21   5   31.54    2.13
  -8 -21   5    3.75    0.71
  -8  21   5    4.13    0.96
  -7 -21   5    0.17    0.39
  -7  21   5    0.10    0.54
  -6 -21   5    6.93    0.96
  -6  21   5    4.64    0.99
  -5 -21   5   15.45    1.23
  -5  21   5   18.49    1.79
   4 -21  -5    0.92    0.52
  -4 -21   5    0.05    0.37
  -4  21   5    0.62    0.60
  -3 -21   5   15.96    1.31
  -3  21   5   16.82    1.62
   2 -21  -5    1.67    0.69
  -2 -21   5    1.81    0.66
  -2  21   5    2.55    0.74
  -1 -21   5    2.79    0.72
   1 -21  -5    0.85    0.54
  -1  21   5    1.39    0.61
   0 -21   5    2.10    0.63
   0  21   5    2.58    0.72
   1 -21   5    7.95    1.08
   2 -21   5    0.44    0.49
  -2  21  -5   -0.14    0.41
   3 -21   5   22.11    1.60
  -3  21  -5   22.16    1.58
   4 -21   5    0.59    0.56
  -4  21  -5    0.35    0.55
   5 -21   5   18.40    1.68
  -5  21  -5   15.13    1.59
   6 -21   5   41.14    2.28
  -6  21  -5   40.26    2.32
   7 -21   5   65.20    2.88
  -7  21  -5   68.87    3.09
  -8  21  -5   -0.64    0.48
  -9  21  -5    1.89    0.80
 -10  21  -5   -0.15    0.58
 -11  21  -5   -0.34    0.63
 -12  21  -5    0.73    0.75
 -13  21  -5   14.85    1.84
 -14  21  -5    0.77    0.78
 -15  21  -5    0.18    0.76
 -16  22   5    1.62    0.94
 -15  22   5   -0.75    0.65
 -14  22   5    9.07    1.50
 -13  22   5   10.53    1.60
 -12 -22   5    2.71    0.66
 -12  22   5    2.42    1.00
 -11 -22   5    4.72    0.77
 -11  22   5    4.64    1.15
 -10 -22   5    3.71    0.74
 -10  22   5    4.51    1.07
  -9 -22   5   10.16    1.09
  -9  22   5    8.58    1.34
  -8 -22   5    0.53    0.43
  -8  22   5   -0.38    0.54
  -7 -22   5    8.04    1.04
  -7  22   5    5.99    1.12
  -6 -22   5    3.55    0.77
  -6  22   5    3.17    0.89
  -5 -22   5    2.25    0.64
  -5  22   5    1.89    0.79
  -4 -22   5    1.09    0.51
  -4  22   5    0.18    0.54
  -3 -22   5   -0.29    0.38
   3 -22  -5    0.14    0.46
  -3  22   5    0.29    0.51
  -2 -22   5    9.45    1.17
   2 -22  -5   12.09    1.37
  -2  22   5    9.46    1.23
  -1 -22   5    3.09    0.76
  -1  22   5    2.50    0.76
   0 -22   5    9.08    1.20
   1 -22   5    0.58    0.49
   2 -22   5   14.33    1.45
   3 -22   5    5.35    0.98
  -3  22  -5    5.92    1.01
   4 -22   5    0.74    0.57
  -4  22  -5    1.60    0.68
   5 -22   5   35.80    2.14
  -5  22  -5   36.97    2.16
   6 -22   5   71.49    3.03
  -6  22  -5   65.08    3.03
  -7  22  -5    6.80    1.21
  -8  22  -5   -0.73    0.51
  -9  22  -5    0.54    0.67
 -10  22  -5    5.76    1.21
 -11  22  -5   -0.13    0.69
 -12  22  -5    9.65    1.56
 -13  22  -5    0.78    0.80
 -14  22  -5    0.04    0.73
 -15  22  -5   -0.39    0.74
 -15  23   5   -0.49    0.76
 -14  23   5    2.92    0.99
 -13  23   5    7.95    1.48
 -12 -23   5    6.22    0.86
 -12  23   5    5.99    1.29
 -11 -23   5   -0.20    0.41
 -11  23   5   -1.27    0.60
 -10 -23   5    5.47    0.89
 -10  23   5    5.85    1.21
  -9 -23   5    0.73    0.54
  -9  23   5    0.76    0.71
  -8 -23   5    5.17    0.91
  -8  23   5    4.83    1.09
  -7 -23   5    9.66    1.20
  -7  23   5   10.53    1.43
  -6 -23   5    0.25    0.52
  -6  23   5    0.06    0.60
  -5 -23   5    0.90    0.53
  -5  23   5    1.26    0.72
  -4 -23   5   11.88    1.30
  -4  23   5   17.79    1.79
  -3 -23   5    4.10    0.84
  -3  23   5    4.65    0.98
  -2 -23   5   -0.03    0.41
  -2  23   5   -0.04    0.52
  -1 -23   5    0.37    0.49
   0 -23   5   10.45    1.32
   1 -23   5   16.54    1.60
   2 -23   5   14.01    1.52
   3 -23   5    0.50    0.53
  -3  23  -5    0.10    0.56
   4 -23   5    2.97    0.79
  -4  23  -5    4.44    0.95
   5 -23   5    8.94    1.25
  -5  23  -5    8.40    1.31
   6 -23   5   28.16    1.93
  -6  23  -5   30.43    2.08
  -7  23  -5    8.15    1.32
  -8  23  -5    0.43    0.61
  -9  23  -5   -0.11    0.65
 -10  23  -5   -1.61    0.56
 -11  23  -5   -1.01    0.66
 -12  23  -5    1.63    0.95
 -13  23  -5    2.01    0.94
 -14  23  -5   -0.36    0.75
 -15  24   5    0.52    0.88
 -14  24   5   -0.30    0.73
 -13  24   5    0.68    0.83
 -12 -24   5    0.63    0.49
 -12  24   5   -0.26    0.68
 -11 -24   5    0.90    0.51
 -11  24   5   -0.13    0.73
 -10 -24   5   -0.13    0.42
 -10  24   5   -0.68    0.57
  -9 -24   5   30.64    1.80
  -9  24   5   31.95    2.32
  -8 -24   5   37.02    1.99
  -8  24   5   35.24    2.40
  -7 -24   5   -0.63    0.48
  -7  24   5    0.22    0.71
  -6 -24   5    0.37    0.53
  -6  24   5    0.78    0.71
  -5 -24   5    7.40    1.08
  -5  24   5    7.31    1.23
  -4 -24   5    8.57    1.13
  -4  24   5    7.54    1.24
  -3 -24   5    0.14    0.47
  -3  24   5    0.50    0.62
  -2 -24   5    1.35    0.61
  -2  24   5    0.98    0.67
  -1 -24   5    5.48    1.00
   0 -24   5   31.17    1.97
   1 -24   5   20.02    1.89
   2 -24   5   29.33    1.96
   3 -24   5    2.74    0.82
   4 -24   5   -0.30    0.43
  -4  24  -5    0.29    0.57
   5 -24   5    1.58    0.73
  -5  24  -5    1.88    0.76
   6 -24   5    2.58    0.79
  -6  24  -5    2.95    0.91
  -7  24  -5   10.06    1.44
  -8  24  -5    0.05    0.61
  -9  24  -5    1.24    0.79
 -10  24  -5    1.97    1.02
 -11  24  -5   -0.12    0.73
 -12  24  -5    6.19    1.39
 -13  24  -5    5.21    1.31
 -14  24  -5   -0.49    0.71
 -14  25   5    5.21    1.30
 -13  25   5    0.04    0.77
 -12 -25   5    0.63    0.51
 -12  25   5    1.13    0.87
 -11 -25   5   -0.15    0.44
 -11  25   5    0.89    0.82
 -10 -25   5    0.79    0.52
 -10  25   5    0.17    0.73
  -9 -25   5   30.83    1.90
  -9  25   5   29.54    2.30
  -8 -25   5   22.91    1.68
  -8  25   5   20.08    2.09
  -7 -25   5   30.59    1.89
  -7  25   5   40.10    2.52
  -6 -25   5    1.91    0.70
  -6  25   5    2.37    0.89
  -5 -25   5    2.14    0.71
  -5  25   5    1.58    0.81
  -4 -25   5    1.39    0.64
  -4  25   5    0.79    0.71
  -3 -25   5   22.25    1.64
  -3  25   5   20.11    1.92
  -2 -25   5    1.08    0.58
  -1 -25   5    6.85    1.11
   0 -25   5    1.26    0.69
   1 -25   5   75.87    3.24
   2 -25   5   21.75    1.78
   3 -25   5   10.63    1.40
   4 -25   5    0.72    0.65
   5 -25   5    0.46    0.56
  -5  25  -5   -0.52    0.53
   6 -25   5    0.17    0.60
  -6  25  -5    1.38    0.79
  -7  25  -5    3.41    1.06
  -8  25  -5    4.28    1.15
  -9  25  -5    3.76    1.11
 -10  25  -5    1.44    0.91
 -11  25  -5    3.13    1.13
 -12  25  -5    0.26    0.82
 -13  25  -5   -0.31    0.77
 -14  26   5    0.23    0.85
 -13  26   5    0.88    0.90
 -12  26   5   -0.69    0.73
 -11 -26   5    0.33    0.53
 -11  26   5    0.09    0.77
 -10 -26   5    3.21    0.78
 -10  26   5    2.74    1.04
  -9 -26   5    5.97    1.01
  -9  26   5    5.37    1.27
  -8 -26   5   32.62    1.97
  -8  26   5   30.48    2.35
  -7 -26   5    1.51    0.68
  -7  26   5    0.43    0.78
  -6 -26   5    2.63    0.75
  -6  26   5    5.06    1.17
  -5 -26   5   -0.25    0.44
  -5  26   5   -0.82    0.55
  -4 -26   5   -0.11    0.42
  -4  26   5    0.47    0.68
  -3 -26   5    0.94    0.59
  -2 -26   5    3.58    0.88
  -1 -26   5   -0.52    0.47
   0 -26   5   18.36    1.85
   1 -26   5   45.14    2.52
   2 -26   5   42.42    2.46
   3 -26   5    1.19    0.73
   4 -26   5   -0.01    0.57
   5 -26   5    4.70    1.05
   6 -26   5    3.90    1.02
  -6  26  -5    3.93    1.05
  -7  26  -5   21.68    2.17
  -8  26  -5    1.87    0.92
  -9  26  -5   -0.36    0.71
 -10  26  -5    0.07    0.79
 -11  26  -5    2.32    1.03
 -12  26  -5    0.74    0.83
 -13  26  -5    0.19    0.89
 -13  27   5   -0.06    0.83
 -12  27   5    3.03    1.15
 -11 -27   5    0.71    0.62
 -11  27   5   -0.18    0.78
 -10 -27   5    1.21    0.68
 -10  27   5    1.86    1.02
  -9 -27   5    8.06    1.19
  -9  27   5   10.22    1.66
  -8 -27   5    8.88    1.26
  -8  27   5    8.84    1.54
  -7 -27   5    3.04    0.80
  -7  27   5    4.64    1.16
  -6 -27   5    0.73    0.59
  -6  27   5   -0.39    0.66
  -5 -27   5    0.07    0.53
  -5  27   5    1.57    0.85
  -4 -27   5   -0.09    0.49
  -3 -27   5   21.95    1.73
  -2 -27   5    0.78    0.61
  -1 -27   5    3.36    0.91
   0 -27   5   14.55    1.66
   1 -27   5    8.38    1.32
   2 -27   5   12.16    1.58
   3 -27   5    4.31    1.03
   4 -27   5    1.90    0.82
   5 -27   5   -0.45    0.62
  -7  27  -5   -0.49    0.72
  -8  27  -5    9.28    1.58
  -9  27  -5    2.18    1.02
 -10  27  -5    0.66    0.87
 -11  27  -5   -1.02    0.70
 -12  27  -5    3.20    1.15
 -12  28   5    4.04    1.28
 -11 -28   5    1.63    0.67
 -11  28   5    0.04    0.87
 -10 -28   5    2.05    0.76
 -10  28   5    2.12    1.11
  -9 -28   5   -0.69    0.45
  -9  28   5   -1.03    0.70
  -8 -28   5    0.59    0.61
  -8  28   5    0.00    0.79
  -7 -28   5    2.23    0.80
  -7  28   5    2.88    1.09
  -6 -28   5    0.92    0.63
  -6  28   5    0.49    0.90
  -5 -28   5    1.22    0.69
  -4 -28   5   63.97    3.00
  -3 -28   5    0.82    0.71
  -2 -28   5   11.30    1.47
  -1 -28   5    0.08    0.56
   0 -28   5    0.60    0.65
   1 -28   5   16.12    1.82
   2 -28   5    3.21    0.92
   3 -28   5    1.49    0.77
   4 -28   5    1.77    0.84
   5 -28   5    5.50    1.26
  -9  28  -5    0.62    0.87
 -10  28  -5    0.58    0.90
 -11  28  -5    0.18    0.85
 -12  28  -5   13.44    2.01
 -11 -29   5    0.50    0.55
 -11  29   5   -0.42    0.84
 -10 -29   5    1.64    0.71
 -10  29   5    0.98    0.99
  -9 -29   5   -0.47    0.49
  -9  29   5   -0.82    0.76
  -8 -29   5    1.04    0.68
  -8  29   5    0.26    0.84
  -7 -29   5    1.12    0.74
  -7  29   5    3.01    1.13
  -6 -29   5    0.34    0.62
  -5 -29   5    9.79    1.39
  -4 -29   5    1.28    0.80
  -3 -29   5   97.50    3.93
  -2 -29   5    1.47    0.75
  -1 -29   5   -0.47    0.51
   0 -29   5    1.97    0.84
   1 -29   5    4.74    1.06
   2 -29   5    0.57    0.69
   3 -29   5   -0.19    0.60
   4 -29   5    4.52    1.13
   5 -29   5    2.13    0.95
 -10  29  -5   -0.50    0.86
 -11  29  -5    2.67    1.20
 -11  30   5    2.31    1.20
 -10 -30   5    0.37    0.61
 -10  30   5    1.67    1.11
  -9 -30   5   -0.67    0.55
  -9  30   5   -1.39    0.71
  -8 -30   5    1.41    0.70
  -7 -30   5   -0.62    0.54
  -6 -30   5   -0.29    0.55
  -5 -30   5    0.20    0.68
  -4 -30   5   65.78    3.17
  -3 -30   5    4.85    1.10
  -2 -30   5   16.87    1.86
  -1 -30   5    0.70    0.72
   0 -30   5    1.73    0.84
   1 -30   5    0.54    0.70
   2 -30   5   -0.26    0.68
   3 -30   5    3.51    1.10
   4 -30   5   -0.26    0.75
   5 -30   5   -0.98    0.60
 -10  31   5    4.96    1.42
  -9 -31   5    1.77    0.76
  -8 -31   5    2.07    0.83
  -7 -31   5    0.38    0.59
  -6 -31   5   -0.04    0.62
  -5 -31   5    7.15    1.34
  -4 -31   5    2.45    0.92
  -3 -31   5   34.81    2.38
  -2 -31   5   -0.29    0.66
  -1 -31   5   -0.31    0.68
   0 -31   5    1.70    0.88
   1 -31   5    0.53    0.76
   2 -31   5   -0.25    0.74
   3 -31   5    0.83    0.84
   4 -31   5    3.55    1.13
  -8 -32   5    7.09    1.25
  -7 -32   5    1.07    0.77
  -6 -32   5    0.01    0.66
  -5 -32   5    0.01    0.65
  -4 -32   5    5.23    1.16
  -3 -32   5    0.72    0.79
  -2 -32   5    2.08    0.99
  -1 -32   5   -0.75    0.65
   0 -32   5    5.84    1.31
   1 -32   5   15.70    1.99
   2 -32   5    9.16    1.66
   3 -32   5    0.25    0.89
   4 -32   5    0.56    0.93
  -6 -33   5   -0.65    0.68
  -5 -33   5    2.34    0.97
  -4 -33   5   -0.82    0.62
  -3 -33   5   -0.13    0.68
  -2 -33   5    0.66    0.85
  -1 -33   5    0.26    0.82
   0 -33   5    4.17    1.25
   1 -33   5   22.87    2.49
   2 -33   5    8.08    1.60
   3 -33   5    2.21    1.16
   4 -33   5    1.25    0.99
  -4 -34   5    0.27    0.71
  -3 -34   5   -0.11    0.77
  -2 -34   5    0.82    0.88
  -1 -34   5    2.50    1.07
   0 -34   5   13.10    1.87
   1 -34   5    6.94    1.50
   2 -34   5    4.28    1.27
   3 -34   5    2.41    1.21
 -15   0   6   -0.94    0.32
 -14   0   6    8.94    0.70
 -13   0   6    0.13    0.26
 -12   0   6   77.72    2.17
 -11   0   6   -0.05    0.19
 -10   0   6   21.06    0.93
  -9   0   6   -0.13    0.20
  -8   0   6  117.36    2.84
  -7   0   6    0.02    0.18
  -6   0   6    1.13    0.28
  -5   0   6    0.17    0.18
  -4   0   6    4.45    0.46
  -3   0   6    0.38    0.22
   3   0  -6   -0.07    0.14
   2   0  -6   19.25    0.82
  -2   0   6   19.41    0.89
  -1   0   6    0.24    0.20
   1   0  -6   -0.08    0.16
   0   0  -6    4.21    0.47
   0   0   6    4.39    0.48
  -1   0  -6   -0.12    0.17
   1   0   6    0.16    0.20
   2   0   6  614.55   12.27
  -2   0  -6  612.96   12.29
   3   0   6   -0.39    0.26
  -3   0  -6   -0.50    0.25
  -4   0  -6  504.49   10.43
   4   0   6  513.28   10.33
  -5   0  -6    0.07    0.21
   5   0   6    0.25    0.22
   6   0   6   29.17    1.17
  -6   0  -6   29.65    1.28
   7   0   6    0.14    0.23
  -7   0  -6    0.20    0.28
  -8   0  -6   22.08    1.17
  -9   0  -6    0.00    0.27
 -10   0  -6   25.67    1.35
 -11   0  -6    0.13    0.33
 -12   0  -6   11.20    1.09
 -13   0  -6    0.21    0.38
 -14   0  -6   12.58    1.21
 -15   0  -6   -0.23    0.37
 -16   0  -6   -0.09    0.42
 -17   0  -6   -0.58    0.40
 -18   0  -6    3.04    0.76
 -19   0  -6   -0.91    0.42
 -20   0  -6    5.67    0.95
 -16   1   6   -0.38    0.37
 -15   1   6   16.89    1.04
 -14  -1   6    1.29    0.34
 -14   1   6    1.30    0.39
 -13  -1   6   28.55    1.13
 -13   1   6   30.92    1.26
 -12  -1   6    0.60    0.26
 -12   1   6    0.43    0.28
 -11  -1   6    0.62    0.25
 -11   1   6    0.75    0.29
 -10  -1   6    1.66    0.31
 -10   1   6    1.64    0.34
  -9  -1   6   12.80    0.70
  -9   1   6   13.53    0.76
  -8  -1   6   39.75    1.27
  -8   1   6   37.51    1.31
  -7  -1   6   19.91    0.83
  -7   1   6   19.58    0.87
  -6  -1   6   40.20    1.30
  -6   1   6   43.51    1.38
  -5  -1   6    0.32    0.20
  -5   1   6    0.03    0.17
  -4  -1   6    9.31    0.59
  -4   1   6   10.22    0.64
  -3  -1   6   69.00    1.91
  -3   1   6   73.82    1.97
   3   1  -6   67.72    1.77
  -2  -1   6  185.83    4.09
  -2   1   6  179.57    4.12
   2   1  -6  181.97    3.98
  -1  -1   6    2.21    0.36
   1   1  -6    2.60    0.36
  -1   1   6    1.79    0.34
   0  -1   6   19.55    0.88
   0   1  -6   18.11    0.84
   0   1   6   19.15    0.90
   1  -1   6    0.19    0.21
  -1   1  -6    0.07    0.20
   1   1   6    0.60    0.25
   2  -1   6   58.18    1.74
  -2   1  -6   60.83    1.79
   2   1   6   53.33    1.73
  -3  -1  -6  989.01   19.42
   3  -1   6  985.78   19.33
   3   1   6 1000.00   19.35
  -3   1  -6  988.97   19.42
  -4  -1  -6   70.57    2.11
   4  -1   6   70.73    2.02
  -4   1  -6   69.08    2.09
   4   1   6   70.02    2.02
   5  -1   6   22.86    1.00
  -5  -1  -6   20.18    1.02
   5   1   6   19.07    0.92
  -5   1  -6   22.09    1.06
  -6  -1  -6    9.40    0.72
   6  -1   6    7.68    0.67
   6   1   6    7.76    0.62
  -6   1  -6    7.09    0.71
   7  -1   6   65.46    1.92
  -7  -1  -6   62.02    2.07
   7   1   6   62.89    1.88
  -7   1  -6   63.24    2.10
  -8  -1  -6   -0.14    0.22
  -8   1  -6    0.56    0.32
  -9  -1  -6   24.29    1.27
  -9   1  -6   24.81    1.30
 -10  -1  -6    1.14    0.40
 -10   1  -6    1.02    0.41
 -11  -1  -6   13.23    1.01
 -11   1  -6   14.25    1.06
 -12  -1  -6    0.48    0.40
 -12   1  -6    1.29    0.47
 -13  -1  -6    3.82    0.69
 -13   1  -6    4.25    0.75
 -14  -1  -6   16.44    1.22
 -14   1  -6   17.67    1.29
 -15  -1  -6   -0.23    0.39
 -15   1  -6   -0.23    0.37
 -16  -1  -6    3.37    0.77
 -16   1  -6    3.55    0.79
 -17  -1  -6    0.91    0.52
 -17   1  -6    0.72    0.55
 -18  -1  -6    3.65    0.77
 -18   1  -6    5.60    0.94
 -19  -1  -6    0.72    0.55
 -19   1  -6    0.34    0.55
 -20  -1  -6   -0.15    0.56
 -20   1  -6    0.83    0.58
 -17   2   6    2.97    0.54
 -16   2   6    0.50    0.43
 -15   2   6    7.50    0.80
 -14   2   6    4.65    0.64
 -13  -2   6    0.53    0.22
 -13   2   6   -0.01    0.27
 -12  -2   6    5.53    0.50
 -12   2   6    4.83    0.60
 -11  -2   6    5.42    0.49
 -11   2   6    4.94    0.58
 -10  -2   6    5.62    0.49
 -10   2   6    5.39    0.58
  -9  -2   6   12.21    0.65
  -9   2   6   10.81    0.73
  -8  -2   6   14.84    0.72
  -8   2   6   15.09    0.82
  -7  -2   6    2.28    0.33
  -7   2   6    1.86    0.34
  -6  -2   6    4.22    0.43
  -6   2   6    3.79    0.46
  -5  -2   6    4.17    0.43
  -5   2   6    3.68    0.45
  -4  -2   6    3.05    0.38
  -4   2   6    2.90    0.40
  -3  -2   6    7.99    0.57
  -3   2   6   12.22    0.71
   3   2  -6    8.31    0.51
  -2  -2   6  163.10    3.65
  -2   2   6  157.31    3.71
   2   2  -6  159.22    3.54
  -1  -2   6  457.62    9.10
   1   2  -6  447.97    9.03
  -1   2   6  441.04    9.17
   0  -2   6    4.01    0.45
   0   2  -6    4.41    0.46
   0   2   6    4.04    0.48
   1  -2   6    3.66    0.44
   1   2   6    3.04    0.42
  -1   2  -6    3.44    0.43
   2  -2   6  190.89    4.28
   2   2   6  187.30    4.29
  -2   2  -6  187.82    4.30
   3  -2   6  295.47    6.35
   3   2   6  293.29    6.35
  -3   2  -6  302.91    6.43
   4  -2   6  135.59    3.34
   4   2   6  136.53    3.33
  -4   2  -6  142.08    3.47
  -5  -2  -6    9.94    0.72
   5  -2   6    9.31    0.68
   5   2   6    8.57    0.63
  -5   2  -6    9.59    0.72
   6  -2   6    0.28    0.21
  -6  -2  -6    0.18    0.24
   6   2   6    0.11    0.19
  -6   2  -6    0.11    0.22
  -7  -2  -6    0.31    0.29
   7  -2   6    0.29    0.26
   7   2   6    0.47    0.27
  -7   2  -6    0.27    0.27
  -8  -2  -6    5.45    0.66
  -8   2  -6    5.01    0.66
  -9  -2  -6    2.44    0.49
  -9   2  -6    2.75    0.54
 -10  -2  -6    3.47    0.59
 -10   2  -6    3.32    0.60
 -11  -2  -6    1.68    0.48
 -11   2  -6    1.71    0.52
 -12  -2  -6   -0.10    0.31
 -12   2  -6   -0.37    0.32
 -13  -2  -6   19.86    1.28
 -13   2  -6   20.23    1.33
 -14  -2  -6    0.56    0.46
 -14   2  -6    0.24    0.43
 -15  -2  -6    0.42    0.44
 -15   2  -6    0.33    0.43
 -16  -2  -6    0.33    0.49
 -16   2  -6    1.02    0.65
 -17  -2  -6   -0.21    0.41
 -17   2  -6    0.29    0.54
 -18  -2  -6    3.13    0.72
 -18   2  -6    2.94    0.76
 -19  -2  -6    2.31    0.67
 -19   2  -6    2.74    0.78
 -20   2  -6    0.42    0.58
 -17   3   6    6.48    0.79
 -16   3   6   -0.31    0.38
 -15   3   6   -0.12    0.36
 -14   3   6    1.79    0.47
 -13   3   6    2.29    0.46
 -12   3   6    0.12    0.27
 -11  -3   6    1.41    0.28
 -11   3   6    1.44    0.40
 -10  -3   6    8.09    0.53
 -10   3   6    8.18    0.74
  -9  -3   6    1.21    0.25
  -9   3   6    0.89    0.32
  -8  -3   6   71.12    1.85
  -8   3   6   72.95    2.11
  -7  -3   6    6.66    0.50
  -7   3   6    7.71    0.61
  -6  -3   6   39.89    1.24
  -6   3   6   39.69    1.38
  -5  -3   6    1.60    0.29
  -5   3   6    1.82    0.36
  -4  -3   6   15.74    0.74
  -4   3   6   17.32    0.86
  -3  -3   6  182.17    4.04
  -3   3   6  183.74    4.19
  -2  -3   6  470.67    9.52
  -2   3   6  478.59    9.68
   2   3  -6  470.92    9.41
  -1  -3   6  201.84    4.51
  -1   3   6  202.83    4.63
   1   3  -6  211.60    4.48
   0  -3   6   78.35    2.10
   0   3  -6   76.85    2.07
   0   3   6   76.93    2.17
   1  -3   6    3.26    0.43
  -1   3  -6    2.63    0.40
   1   3   6    2.19    0.38
   2  -3   6  111.59    2.83
   2   3   6  116.06    2.89
  -2   3  -6  110.07    2.86
   3  -3   6   35.33    1.31
  -3   3  -6   38.95    1.40
   3   3   6   35.79    1.34
   4  -3   6   27.46    1.16
   4   3   6   30.00    1.18
  -4   3  -6   29.13    1.24
   5  -3   6    1.96    0.39
  -5   3  -6    1.62    0.39
   5   3   6    2.61    0.40
   6  -3   6    2.26    0.39
  -6   3  -6    2.37    0.46
   6   3   6    2.68    0.41
  -7  -3  -6   54.39    1.90
   7  -3   6   55.45    1.80
  -7   3  -6   53.88    1.94
  -8  -3  -6   26.72    1.29
  -8   3  -6   25.87    1.34
  -9  -3  -6   18.57    1.11
  -9   3  -6   18.00    1.15
 -10  -3  -6    4.24    0.64
 -10   3  -6    4.56    0.69
 -11  -3  -6   -0.08    0.29
 -11   3  -6    0.33    0.35
 -12  -3  -6    2.63    0.56
 -12   3  -6    2.57    0.63
 -13  -3  -6    1.61    0.52
 -13   3  -6    0.80    0.46
 -14  -3  -6   40.77    1.87
 -14   3  -6   39.92    1.97
 -15  -3  -6    2.90    0.65
 -15   3  -6    2.44    0.69
 -16  -3  -6   18.35    1.32
 -16   3  -6   17.66    1.42
 -17  -3  -6    0.74    0.49
 -17   3  -6   -0.18    0.52
 -18  -3  -6    8.27    1.03
 -18   3  -6    6.00    0.99
 -19  -3  -6    1.62    0.60
 -19   3  -6    1.92    0.74
 -18   4   6    1.40    0.51
 -17   4   6    4.68    0.73
 -16   4   6    2.70    0.61
 -15   4   6    0.23    0.40
 -14   4   6    0.94    0.43
 -13   4   6    7.05    0.80
 -12   4   6   20.27    1.14
 -11   4   6    2.46    0.49
 -10  -4   6    4.32    0.40
 -10   4   6    4.27    0.57
  -9  -4   6    0.05    0.17
  -9   4   6   -0.13    0.21
  -8  -4   6   46.53    1.35
  -8   4   6   49.93    1.68
  -7  -4   6   63.79    1.67
  -7   4   6   61.95    1.93
  -6  -4   6   15.10    0.70
  -6   4   6   16.10    0.85
  -5  -4   6   16.53    0.74
  -5   4   6   16.02    0.86
  -4  -4   6   45.19    1.37
  -4   4   6   44.85    1.52
  -3  -4   6   15.10    0.73
  -3   4   6   12.05    0.77
  -2  -4   6  403.98    8.29
  -2   4   6  410.53    8.47
   2   4  -6  405.72    8.18
  -1  -4   6  335.63    6.79
  -1   4   6  327.41    6.93
   1   4  -6  309.33    6.68
   0  -4   6  109.53    2.73
   0   4  -6  105.49    2.68
   0   4   6  110.74    2.83
   1  -4   6    0.18    0.20
  -1   4  -6    0.78    0.25
   1   4   6   -0.15    0.19
   2  -4   6   40.35    1.40
  -2   4  -6   39.31    1.40
   2   4   6   39.87    1.44
   3  -4   6   40.33    1.43
  -3   4  -6   41.75    1.48
   3   4   6   38.20    1.41
   4  -4   6    5.02    0.56
  -4   4  -6    4.54    0.56
   4   4   6    3.83    0.49
   5  -4   6    2.02    0.40
  -5   4  -6    1.98    0.43
   5   4   6    2.05    0.38
   6  -4   6   30.56    1.27
  -6   4  -6   34.31    1.44
   6   4   6   31.38    1.21
   7  -4   6   32.80    1.36
  -7   4  -6   32.86    1.49
  -8  -4  -6  115.07    3.19
  -8   4  -6  112.06    3.26
  -9  -4  -6   42.55    1.74
  -9   4  -6   44.53    1.84
 -10  -4  -6    1.82    0.47
 -10   4  -6    2.06    0.51
 -11  -4  -6    3.85    0.63
 -11   4  -6    2.86    0.66
 -12  -4  -6    7.56    0.87
 -12   4  -6    7.11    0.94
 -13  -4  -6    0.83    0.44
 -13   4  -6    1.12    0.52
 -14  -4  -6    2.29    0.61
 -14   4  -6    1.69    0.59
 -15  -4  -6   -0.15    0.33
 -15   4  -6    0.16    0.43
 -16  -4  -6    1.53    0.59
 -16   4  -6    1.92    0.68
 -17  -4  -6    1.45    0.56
 -17   4  -6    1.84    0.68
 -18  -4  -6    0.48    0.50
 -18   4  -6   -0.43    0.48
 -19  -4  -6    0.09    0.46
 -19   4  -6    0.56    0.58
 -18   5   6   11.67    1.12
 -17   5   6    4.27    0.74
 -16   5   6    0.89    0.47
 -15   5   6    7.47    0.90
 -14   5   6   11.28    1.05
 -13   5   6   14.51    1.06
 -12   5   6    1.46    0.47
 -11   5   6    6.35    0.76
 -10   5   6   13.60    0.94
  -9  -5   6    8.81    0.49
  -9   5   6    7.57    0.75
  -8  -5   6   28.82    0.97
  -8   5   6   31.84    1.33
  -7  -5   6    8.88    0.58
  -7   5   6   12.26    0.81
  -6  -5   6   31.96    1.07
  -6  -5   6   31.33    1.05
  -6   5   6   33.41    1.31
  -5  -5   6   25.75    0.96
  -5   5   6   29.03    1.19
  -4  -5   6    0.39    0.20
  -4   5   6    0.23    0.23
  -3  -5   6   67.14    1.82
  -3   5   6   62.05    1.95
  -2  -5   6   80.24    2.11
   2   5  -6   79.55    2.01
  -2   5   6   75.31    2.23
  -1  -5   6  214.85    4.73
   1   5  -6  211.56    4.66
  -1   5   6  216.78    4.89
   0  -5   6    2.50    0.40
   0   5  -6    2.95    0.42
   0   5   6    2.12    0.39
   1  -5   6    0.47    0.22
   1   5   6    0.39    0.25
  -1   5  -6    0.04    0.18
   2  -5   6   17.03    0.89
  -2   5  -6   17.34    0.90
   2   5   6   18.77    0.95
   3  -5   6   67.25    2.03
   3   5   6   68.48    2.04
  -3   5  -6   66.76    2.06
   4  -5   6   30.72    1.26
   4   5   6   30.81    1.22
  -4   5  -6   29.58    1.29
   5  -5   6   33.90    1.35
  -5   5  -6   35.17    1.45
   5   5   6   33.96    1.29
   6  -5   6    8.78    0.78
   6   5   6    8.74    0.65
  -6   5  -6    9.77    0.80
   7  -5   6  280.36    6.27
  -7   5  -6  282.66    6.50
  -8   5  -6  204.23    5.09
  -9  -5  -6    1.09    0.43
  -9   5  -6    1.10    0.45
 -10  -5  -6   18.78    1.15
 -10   5  -6   19.77    1.26
 -11  -5  -6   10.23    1.01
 -11   5  -6    8.94    1.03
 -12  -5  -6    2.24    0.54
 -12   5  -6    1.86    0.61
 -13  -5  -6    0.21    0.40
 -13   5  -6    0.69    0.47
 -14  -5  -6    1.44    0.53
 -14   5  -6    1.00    0.52
 -15  -5  -6    0.79    0.44
 -15   5  -6   -0.36    0.38
 -16  -5  -6    7.47    0.98
 -16   5  -6    8.83    1.19
 -17  -5  -6    0.64    0.44
 -17   5  -6    0.43    0.56
 -18  -5  -6   -0.04    0.42
 -18   5  -6    0.15    0.54
 -19   5  -6    0.08    0.57
 -19   6   6   13.68    1.28
 -18   6   6   12.93    1.23
 -17   6   6    5.18    0.82
 -16   6   6   -0.57    0.37
 -15   6   6   -0.46    0.39
 -14   6   6   15.36    1.16
 -13   6   6   16.65    1.16
 -12   6   6   11.04    1.02
 -11   6   6    0.40    0.38
 -10   6   6   27.26    1.35
  -9  -6   6    0.76    0.20
  -9   6   6    0.38    0.32
  -8  -6   6    0.01    0.17
  -8  -6   6    0.07    0.16
  -8   6   6   -0.09    0.22
  -7  -6   6  120.77    2.83
  -7  -6   6  126.54    2.84
  -7   6   6  126.09    3.30
  -6  -6   6  196.71    4.22
  -6  -6   6  196.62    4.20
  -6   6   6  192.02    4.61
  -5  -6   6   52.29    1.50
  -5   6   6   50.05    1.73
  -4  -6   6    1.91    0.32
  -4   6   6    2.32    0.43
  -3  -6   6   15.72    0.77
  -3   6   6   16.24    0.91
  -2  -6   6    6.72    0.54
   2   6  -6    7.10    0.52
  -2   6   6    6.30    0.65
  -1  -6   6   27.72    1.10
   1   6  -6   25.59    1.03
  -1   6   6   30.57    1.25
   0  -6   6   36.29    1.31
   0   6   6   34.97    1.37
   0   6  -6   34.06    1.25
   1  -6   6   11.67    0.74
   1   6   6   12.35    0.80
  -1   6  -6   10.99    0.71
   2  -6   6    0.82    0.29
  -2   6  -6   -0.09    0.18
   3  -6   6   20.87    1.02
  -3   6  -6   20.85    1.04
   3   6   6   18.51    0.98
   4  -6   6    0.20    0.22
   4   6   6    0.70    0.30
  -4   6  -6    0.41    0.28
   5  -6   6    9.62    0.74
  -5   6  -6   11.32    0.83
   5   6   6    9.11    0.69
   6  -6   6   23.79    1.15
   6   6   6   23.63    1.05
  -6   6  -6   23.45    1.22
   7  -6   6   49.74    1.79
  -7   6  -6   46.89    1.89
  -8   6  -6   63.04    2.30
  -9   6  -6  159.87    4.34
 -10  -6  -6    0.99    0.42
 -10   6  -6    1.46    0.48
 -11  -6  -6    2.52    0.56
 -11   6  -6    3.12    0.69
 -12  -6  -6    0.46    0.37
 -12   6  -6   -0.06    0.46
 -13  -6  -6    0.42    0.38
 -13   6  -6    0.08    0.43
 -14  -6  -6    2.08    0.58
 -14   6  -6    2.32    0.69
 -15  -6  -6    0.07    0.42
 -15   6  -6   -0.05    0.43
 -16  -6  -6   -0.08    0.41
 -16   6  -6   -0.24    0.48
 -17  -6  -6    1.63    0.56
 -17   6  -6    0.37    0.59
 -18  -6  -6    1.02    0.51
 -18   6  -6    0.48    0.59
 -19   6  -6    1.17    0.66
 -19   7   6   14.61    1.37
 -18   7   6   18.12    1.41
 -17   7   6    6.61    0.95
 -16   7   6    0.47    0.46
 -15   7   6    7.02    0.93
 -14   7   6    2.92    0.68
 -13   7   6   -0.28    0.34
 -12   7   6    2.48    0.59
 -11   7   6    5.55    0.77
 -10   7   6   -0.26    0.30
  -9  -7   6    0.38    0.17
  -9   7   6    0.38    0.32
  -8  -7   6    5.07    0.43
  -8  -7   6    5.59    0.45
  -8   7   6    5.49    0.70
  -7  -7   6  203.35    4.32
  -7  -7   6  202.22    4.31
  -7   7   6  199.01    4.85
  -6  -7   6  273.90    5.77
  -6  -7   6  282.51    5.78
  -6   7   6  274.63    6.25
  -5  -7   6   42.78    1.34
  -5   7   6   41.67    1.59
  -4  -7   6   18.32    0.84
  -4   7   6   19.32    1.02
  -3  -7   6  156.01    3.62
  -3   7   6  158.34    3.89
  -2  -7   6   38.79    1.34
  -2   7   6   39.24    1.50
   2   7  -6   39.36    1.28
  -1  -7   6   22.39    0.99
   1   7  -6   19.62    0.89
  -1   7   6   21.10    1.07
   0  -7   6    1.16    0.32
   0   7  -6    1.23    0.32
   0   7   6    1.12    0.33
   1  -7   6   47.42    1.63
  -1   7  -6   50.22    1.64
   1   7   6   48.02    1.70
   2  -7   6    1.95    0.40
  -2   7  -6    1.94    0.38
   2   7   6    2.43    0.45
   3  -7   6    2.83    0.45
   3   7   6    3.43    0.51
  -3   7  -6    3.62    0.53
   4  -7   6   10.19    0.76
  -4   7  -6    9.90    0.78
   4   7   6    9.13    0.72
   5  -7   6    0.05    0.23
   5   7   6    0.05    0.22
  -5   7  -6   -0.21    0.22
   6  -7   6    0.56    0.30
   6   7   6    0.42    0.27
  -6   7  -6    0.45    0.33
   7  -7   6   81.38    2.49
  -7   7  -6   80.63    2.64
  -8   7  -6   59.69    2.25
  -9   7  -6    1.15    0.49
 -10   7  -6    8.53    0.99
 -11  -7  -6    4.85    0.72
 -11   7  -6    4.75    0.81
 -12  -7  -6   18.25    1.21
 -12   7  -6   19.04    1.42
 -13  -7  -6   21.95    1.36
 -13   7  -6   22.58    1.55
 -14  -7  -6    0.27    0.39
 -14   7  -6    0.57    0.52
 -15  -7  -6    3.33    0.69
 -15   7  -6    4.29    0.89
 -16  -7  -6    3.79    0.73
 -16   7  -6    3.46    0.86
 -17  -7  -6    2.00    0.62
 -17   7  -6    2.59    0.79
 -18  -7  -6    2.20    0.60
 -18   7  -6    2.12    0.75
 -19   7  -6    9.25    1.27
 -20   8   6    0.82    0.62
 -19   8   6   21.48    1.54
 -18   8   6   29.97    1.79
 -17   8   6    1.35    0.62
 -16   8   6   -0.20    0.43
 -15   8   6    0.72    0.51
 -14   8   6    0.55    0.50
 -13   8   6    0.48    0.42
 -12   8   6    0.33    0.39
 -11   8   6    4.98    0.74
 -10   8   6   -0.35    0.28
  -9  -8   6    1.99    0.28
  -9   8   6    1.59    0.46
  -8  -8   6   39.54    1.20
  -8   8   6   40.29    1.68
  -7  -8   6   37.78    1.22
  -7   8   6   36.84    1.59
  -6  -8   6  144.04    3.31
  -6  -8   6  146.68    3.33
  -6   8   6  142.83    3.77
  -5  -8   6   48.49    1.50
  -5   8   6   51.29    1.83
  -4  -8   6   62.23    1.79
  -4   8   6   60.55    2.02
  -3  -8   6    9.10    0.64
  -3   8   6    9.49    0.77
  -2  -8   6  120.42    2.98
  -2   8   6  114.61    3.14
   2   8  -6  117.45    2.85
  -1  -8   6   35.16    1.30
  -1   8   6   30.14    1.33
   1   8  -6   31.30    1.20
   0  -8   6   26.57    1.16
   0   8   6   26.38    1.23
   0   8  -6   26.17    1.11
   1  -8   6    1.47    0.36
   1   8   6    1.49    0.38
  -1   8  -6    1.47    0.36
   2  -8   6  101.95    2.84
   2   8   6  105.77    2.90
  -2   8  -6  107.63    2.89
   3  -8   6   16.97    0.98
   3   8   6   18.71    1.02
  -3   8  -6   17.36    1.00
   4  -8   6    1.67    0.43
  -4   8  -6    1.67    0.45
   4   8   6    2.65    0.46
   5  -8   6   10.73    0.85
   5   8   6   10.10    0.76
  -5   8  -6    9.25    0.90
   6  -8   6    9.66    0.90
  -6   8  -6    9.95    0.95
   7  -8   6    0.55    0.37
  -7   8  -6    0.59    0.41
  -8   8  -6    0.38    0.38
  -9   8  -6    9.08    1.01
 -10   8  -6    1.77    0.55
 -11  -8  -6   30.18    1.55
 -11   8  -6   33.37    1.80
 -12  -8  -6   26.36    1.47
 -12   8  -6   22.26    1.56
 -13  -8  -6   12.14    1.15
 -13   8  -6   12.26    1.31
 -14  -8  -6    1.98    0.55
 -14   8  -6    0.41    0.51
 -15  -8  -6    2.57    0.65
 -15   8  -6    4.08    0.89
 -16  -8  -6   -0.07    0.43
 -16   8  -6   -0.04    0.53
 -17  -8  -6    0.43    0.47
 -17   8  -6    0.21    0.55
 -18  -8  -6    0.85    0.51
 -18   8  -6    0.05    0.59
 -19   8  -6    0.90    0.67
 -20   9   6    3.79    0.86
 -19   9   6    4.50    0.90
 -18   9   6    0.06    0.57
 -17   9   6    8.58    1.16
 -16   9   6    0.90    0.58
 -15   9   6    7.68    1.04
 -14   9   6   19.96    1.42
 -13   9   6    3.01    0.68
 -12   9   6    7.81    0.96
 -11   9   6   15.52    1.18
 -10  -9   6   -0.11    0.17
 -10   9   6    0.40    0.37
  -9  -9   6    4.96    0.43
  -9   9   6    5.55    0.76
  -8  -9   6    0.62    0.22
  -8   9   6   -0.23    0.26
  -7  -9   6  103.43    2.54
  -7   9   6  103.53    3.07
  -6  -9   6  102.44    2.55
  -6   9   6   98.88    2.96
  -5  -9   6    3.05    0.42
  -5   9   6    3.28    0.57
  -4  -9   6   18.41    0.88
  -4   9   6   16.45    1.01
  -3  -9   6  162.33    3.83
  -3   9   6  163.06    4.11
   3   9  -6  160.79    3.67
  -2  -9   6   33.38    1.32
   2   9  -6   37.71    1.28
  -2   9   6   35.51    1.49
  -1  -9   6   12.56    0.80
  -1   9   6   12.86    0.89
   1   9  -6   13.55    0.78
   0  -9   6    9.56    0.73
   0   9  -6    8.75    0.67
   0   9   6    7.00    0.73
   1  -9   6    4.89    0.59
   1   9   6    4.06    0.58
  -1   9  -6    4.43    0.57
   2  -9   6   41.11    1.56
  -2   9  -6   39.73    1.54
   2   9   6   40.58    1.59
   3  -9   6   38.91    1.56
   3   9   6   37.77    1.53
  -3   9  -6   39.79    1.58
   4  -9   6   80.31    2.51
   4   9   6   80.19    2.43
  -4   9  -6   86.65    2.61
   5  -9   6    6.44    0.74
  -5   9  -6    4.29    0.66
   5   9   6    5.68    0.65
   6  -9   6    0.69    0.35
  -6   9  -6    0.39    0.34
   7  -9   6    1.32    0.49
  -7   9  -6    0.88    0.47
  -8   9  -6   12.13    1.14
  -9   9  -6    0.22    0.37
 -10   9  -6    1.14    0.51
 -11   9  -6    3.46    0.73
 -12  -9  -6   79.51    2.72
 -12   9  -6   75.06    2.97
 -13  -9  -6   32.25    1.67
 -13   9  -6   32.67    1.92
 -14  -9  -6    2.27    0.59
 -14   9  -6    0.75    0.58
 -15  -9  -6    1.74    0.58
 -15   9  -6    1.60    0.70
 -16  -9  -6    6.21    0.86
 -16   9  -6    4.49    0.96
 -17  -9  -6    3.39    0.69
 -17   9  -6    2.45    0.81
 -18   9  -6    0.85    0.68
 -19   9  -6   11.07    1.49
 -20  10   6    0.28    0.60
 -19  10   6    1.41    0.70
 -18  10   6    2.17    0.77
 -17  10   6    5.61    1.03
 -16  10   6   -0.36    0.47
 -15  10   6    7.42    1.04
 -14  10   6   37.50    2.00
 -13  10   6   24.22    1.55
 -12  10   6   19.42    1.37
 -11  10   6   53.80    2.26
 -10 -10   6   70.70    1.80
 -10  10   6   70.44    2.58
  -9 -10   6    9.37    0.58
  -9  10   6    9.37    1.02
  -8 -10   6    0.27    0.20
  -8  10   6   -0.05    0.29
  -7 -10   6    3.95    0.45
  -7  10   6    2.85    0.58
  -6 -10   6    4.80    0.52
  -6  10   6    2.77    0.56
  -5 -10   6   22.50    0.99
  -5  10   6   19.87    1.17
  -4 -10   6    1.64    0.36
  -4  10   6    1.39    0.40
  -3 -10   6   12.60    0.79
   3  10  -6   11.48    0.68
  -3  10   6   10.09    0.83
  -2 -10   6   13.52    0.82
   2  10  -6   11.33    0.72
  -2  10   6   13.68    0.93
  -1 -10   6    0.81    0.30
   1  10  -6    1.29    0.32
  -1  10   6    1.00    0.37
   0 -10   6   26.25    1.20
   0  10  -6   28.35    1.20
   0  10   6   25.35    1.27
   1 -10   6   12.01    0.84
  -1  10  -6   11.87    0.82
   1  10   6   12.24    0.90
   2 -10   6   10.63    0.82
  -2  10  -6    8.60    0.81
   2  10   6   10.19    0.84
   3 -10   6    6.53    0.73
  -3  10  -6    7.77    0.82
   3  10   6    8.64    0.85
   4 -10   6    3.47    0.60
  -4  10  -6    4.89    0.72
   4  10   6    4.19    0.62
   5 -10   6   74.77    2.45
   5  10   6   75.67    2.32
  -5  10  -6   77.83    2.57
   6 -10   6    4.94    0.72
  -6  10  -6    3.32    0.65
   7 -10   6   -0.37    0.27
  -7  10  -6   -0.41    0.35
  -8  10  -6   11.86    1.20
  -9  10  -6   24.59    1.50
 -10  10  -6    3.96    0.76
 -11  10  -6   14.81    1.46
 -12 -10  -6   35.24    1.78
 -12  10  -6   36.19    2.02
 -13 -10  -6   41.15    1.91
 -13  10  -6   39.57    2.16
 -14 -10  -6    1.03    0.47
 -14  10  -6    1.36    0.67
 -15 -10  -6   -0.49    0.36
 -15  10  -6   -0.39    0.50
 -16 -10  -6    0.59    0.47
 -16  10  -6    0.47    0.63
 -17 -10  -6    0.23    0.43
 -17  10  -6    0.57    0.62
 -18  10  -6    0.00    0.60
 -19  11   6    1.30    0.68
 -18  11   6    0.71    0.60
 -17  11   6    1.50    0.70
 -16  11   6    0.18    0.55
 -15  11   6   32.83    1.93
 -14  11   6   46.86    2.29
 -13  11   6   32.83    1.86
 -12  11   6   19.38    1.41
 -11  11   6   92.56    3.20
 -10 -11   6    5.34    0.50
 -10  11   6    5.86    0.90
  -9 -11   6   10.82    0.65
  -9  11   6   12.33    1.17
  -8 -11   6    1.87    0.34
  -8  11   6    2.18    0.55
  -7 -11   6   14.89    0.79
  -7  11   6   14.45    1.11
  -6 -11   6    0.26    0.24
  -6  11   6   -0.32    0.31
  -5 -11   6   10.45    0.72
  -5  11   6    7.43    0.84
  -4 -11   6    2.19    0.42
  -4  11   6    2.57    0.53
  -3 -11   6   34.41    1.35
  -3  11   6   32.82    1.51
   3  11  -6   33.87    1.24
  -2 -11   6    0.67    0.31
  -2  11   6    1.23    0.42
   2  11  -6    0.99    0.30
  -1 -11   6    0.29    0.25
   1  11  -6    0.50    0.26
  -1  11   6    0.72    0.33
   0 -11   6    2.81    0.47
   0  11   6    4.03    0.60
   0  11  -6    2.89    0.47
   1 -11   6   19.67    1.09
  -1  11  -6   21.52    1.11
   1  11   6   20.09    1.18
   2 -11   6   44.51    1.75
  -2  11  -6   47.43    1.78
   2  11   6   46.74    1.80
   3 -11   6   11.61    0.89
  -3  11  -6   11.24    0.89
   3  11   6   11.31    0.88
   4 -11   6  166.74    4.26
  -4  11  -6  161.82    4.29
   4  11   6  160.10    4.12
   5 -11   6    6.28    0.79
  -5  11  -6    4.31    0.68
   6 -11   6    7.75    0.88
  -6  11  -6    6.01    0.82
   7 -11   6   14.10    1.08
  -7  11  -6   11.71    1.17
  -8  11  -6   37.81    1.88
  -9  11  -6    4.13    0.78
 -10  11  -6    0.04    0.42
 -11  11  -6   23.20    1.59
 -12  11  -6   28.40    1.81
 -13 -11  -6    1.55    0.60
 -13  11  -6    3.78    0.92
 -14 -11  -6    0.43    0.42
 -14  11  -6   -0.11    0.51
 -15 -11  -6   10.55    1.10
 -15  11  -6   11.69    1.50
 -16 -11  -6    9.84    1.07
 -16  11  -6   10.69    1.43
 -17 -11  -6    0.76    0.49
 -17  11  -6    0.90    0.68
 -18  11  -6    0.67    0.69
 -19  12   6    0.95    0.66
 -18  12   6    3.26    0.88
 -17  12   6    3.25    0.85
 -16  12   6    0.03    0.52
 -15  12   6   15.47    1.54
 -14  12   6   41.79    2.20
 -13  12   6   14.92    1.47
 -12  12   6   38.58    2.03
 -11 -12   6   51.89    1.52
 -11  12   6   53.26    2.35
 -10 -12   6   25.80    1.03
 -10  12   6   25.38    1.59
  -9 -12   6    1.14    0.30
  -9  12   6    0.62    0.44
  -8 -12   6    2.46    0.40
  -8  12   6    3.99    0.72
  -7 -12   6   16.83    0.90
  -7  12   6   18.33    1.27
  -6 -12   6   23.23    1.07
  -6  12   6   24.30    1.40
  -5 -12   6    0.84    0.32
  -5  12   6    0.87    0.42
  -4 -12   6    6.40    0.68
  -4  12   6    4.76    0.70
  -3 -12   6    0.40    0.29
   3  12  -6    1.06    0.32
  -3  12   6    0.35    0.34
  -2 -12   6   68.10    2.17
  -2  12   6   65.86    2.34
   2  12  -6   69.46    2.07
  -1 -12   6    0.33    0.28
   1  12  -6    0.59    0.28
  -1  12   6    0.60    0.35
   0 -12   6    6.35    0.71
   0  12  -6    7.76    0.76
   0  12   6    8.01    0.86
   1 -12   6   65.22    2.17
   1  12   6   60.33    2.18
  -1  12  -6   60.29    2.07
   2 -12   6   13.41    0.98
   2  12   6   13.70    1.00
  -2  12  -6   13.12    0.95
   3 -12   6    4.68    0.67
  -3  12  -6    4.87    0.68
   3  12   6    4.12    0.64
   4 -12   6    6.64    0.79
  -4  12  -6    8.99    0.94
   4  12   6    9.17    0.90
   5 -12   6    1.56    0.46
  -5  12  -6    1.88    0.51
   6 -12   6   -0.31    0.29
  -6  12  -6   -0.41    0.30
   7 -12   6    0.56    0.40
  -7  12  -6    0.61    0.44
  -8  12  -6    1.11    0.52
  -9  12  -6    1.78    0.63
 -10  12  -6   -0.58    0.35
 -11  12  -6    0.69    0.55
 -12  12  -6    1.50    0.65
 -13 -12  -6    3.25    0.70
 -13  12  -6    4.52    0.96
 -14 -12  -6   10.04    1.08
 -14  12  -6   10.48    1.36
 -15 -12  -6   17.84    1.31
 -15  12  -6   15.75    1.69
 -16 -12  -6    3.39    0.74
 -16  12  -6    6.65    1.17
 -17 -12  -6   19.79    1.32
 -17  12  -6   18.77    1.90
 -18  12  -6    1.23    0.79
 -19  13   6    0.36    0.61
 -18  13   6    0.10    0.62
 -17  13   6   -0.31    0.52
 -16  13   6    9.93    1.34
 -15  13   6    1.54    0.69
 -14  13   6   15.73    1.55
 -13  13   6   14.13    1.44
 -12  13   6    5.10    0.90
 -11  13   6   11.16    1.26
 -10 -13   6   36.12    1.30
 -10  13   6   33.10    1.86
  -9 -13   6   11.02    0.76
  -9  13   6   12.71    1.29
  -8 -13   6    8.63    0.67
  -8  13   6    7.33    0.94
  -7 -13   6   37.33    1.42
  -7  13   6   37.06    1.83
  -6 -13   6   14.53    0.90
  -6  13   6   16.51    1.21
  -5 -13   6    9.23    0.76
  -5  13   6    8.48    0.97
  -4 -13   6    0.00    0.27
  -4  13   6    0.50    0.39
  -3 -13   6  133.23    3.47
  -3  13   6  126.59    3.70
  -2 -13   6    7.37    0.78
  -2  13   6    5.66    0.79
   2  13  -6    7.98    0.76
  -1 -13   6    2.40    0.49
   1  13  -6    3.23    0.52
  -1  13   6    2.30    0.53
   0 -13   6   20.76    1.17
   0  13   6   17.77    1.17
   0  13  -6   17.56    1.07
   1 -13   6   14.37    1.02
  -1  13  -6   13.80    0.99
   1  13   6   12.85    1.01
   2 -13   6   15.26    1.06
  -2  13  -6   14.93    1.05
   2  13   6   14.74    1.06
   3 -13   6    0.14    0.33
  -3  13  -6    0.41    0.35
   3  13   6    0.30    0.34
   4 -13   6    0.06    0.29
  -4  13  -6    2.08    0.54
   4  13   6    0.23    0.34
   5 -13   6    1.86    0.51
  -5  13  -6    2.46    0.59
   6 -13   6    1.37    0.47
  -6  13  -6    0.53    0.39
   7 -13   6    0.46    0.38
  -7  13  -6    0.23    0.39
  -8  13  -6    5.40    0.88
  -9  13  -6   15.52    1.53
 -10  13  -6    1.42    0.64
 -11  13  -6    2.10    0.72
 -12  13  -6    0.06    0.47
 -13  13  -6    3.08    0.83
 -14 -13  -6    7.62    0.99
 -14  13  -6    8.15    1.20
 -15 -13  -6   34.43    1.82
 -15  13  -6   34.74    2.22
 -16 -13  -6   46.35    2.05
 -16  13  -6   43.68    2.54
 -17 -13  -6    7.04    0.92
 -17  13  -6    7.58    1.31
 -18  13  -6    8.46    1.37
 -19  14   6   -0.17    0.67
 -18  14   6    1.01    0.71
 -17  14   6    0.56    0.68
 -16  14   6    5.88    1.09
 -15  14   6   16.23    1.64
 -14  14   6    0.73    0.60
 -13  14   6    2.53    0.77
 -12  14   6    0.29    0.50
 -11 -14   6   11.45    0.73
 -11  14   6    8.93    1.14
 -10 -14   6   23.36    1.10
 -10  14   6   26.54    1.70
  -9 -14   6   87.33    2.46
  -9  14   6   89.04    3.20
  -8 -14   6   11.43    0.79
  -8  14   6    9.10    1.09
  -7 -14   6    1.50    0.38
  -7  14   6    1.41    0.54
  -6 -14   6    0.01    0.24
  -6  14   6   -0.08    0.33
  -5 -14   6   21.18    1.12
  -5  14   6   20.90    1.37
  -4 -14   6    0.30    0.27
  -4  14   6    0.12    0.37
  -3 -14   6   10.54    0.86
  -3  14   6   10.22    1.07
  -2 -14   6   31.00    1.45
   2  14  -6   33.66    1.39
  -2  14   6   31.15    1.62
  -1 -14   6    2.34    0.51
  -1  14   6    1.37    0.49
   1  14  -6    1.95    0.46
   0 -14   6   46.29    1.88
   0  14  -6   46.64    1.83
   0  14   6   51.63    2.05
   1 -14   6   18.93    1.19
   1  14   6   18.13    1.20
  -1  14  -6   18.89    1.19
   2 -14   6    9.32    0.99
   2  14   6    9.42    0.96
  -2  14  -6    8.42    0.94
   3 -14   6    5.63    0.79
   3  14   6    4.51    0.70
  -3  14  -6    5.20    0.78
   4 -14   6   32.55    1.61
  -4  14  -6   29.90    1.58
   5 -14   6    3.08    0.65
  -5  14  -6    2.63    0.61
   6 -14   6    3.41    0.69
  -6  14  -6    2.86    0.67
   7 -14   6    4.46    0.77
  -7  14  -6    5.22    0.88
  -8  14  -6    2.00    0.69
  -9  14  -6   25.48    1.73
 -10  14  -6    1.28    0.65
 -11  14  -6   -0.31    0.47
 -12  14  -6    7.33    1.14
 -13  14  -6    6.73    1.16
 -14 -14  -6    5.73    0.90
 -14  14  -6    5.02    1.03
 -15 -14  -6   29.17    1.70
 -15  14  -6   31.80    2.15
 -16 -14  -6    2.20    0.68
 -16  14  -6    3.19    0.92
 -17 -14  -6   26.03    1.52
 -17  14  -6   25.75    2.05
 -18  14  -6    2.12    0.89
 -18  15   6    0.24    0.66
 -17  15   6    4.71    1.05
 -16  15   6   31.54    2.13
 -15  15   6    5.09    1.08
 -14  15   6    0.62    0.62
 -13  15   6    0.35    0.53
 -12  15   6    0.96    0.62
 -11 -15   6   23.91    1.07
 -11  15   6   22.51    1.63
 -10 -15   6   56.90    1.87
 -10  15   6   56.62    2.58
  -9 -15   6   92.66    2.65
  -9  15   6   93.01    3.39
  -8 -15   6    8.84    0.83
  -8  15   6   10.55    1.23
  -7 -15   6   14.64    0.94
  -7  15   6   13.78    1.33
  -6 -15   6    2.43    0.47
  -6  15   6    1.98    0.61
  -5 -15   6   12.46    0.92
  -5  15   6   12.96    1.27
  -4 -15   6    7.88    0.81
  -4  15   6    7.64    0.96
  -3 -15   6   14.26    0.99
  -3  15   6   12.51    1.23
  -2 -15   6   10.27    0.98
  -2  15   6   12.26    1.22
  -1 -15   6   25.69    1.36
   1  15  -6   24.58    1.27
  -1  15   6   26.22    1.50
   0 -15   6   27.62    1.44
   0  15  -6   26.15    1.36
   0  15   6   23.53    1.43
   1 -15   6   11.28    1.07
  -1  15  -6   10.59    1.02
   1  15   6   13.44    1.07
   2 -15   6   18.55    1.28
   2  15   6   21.68    1.31
  -2  15  -6   21.39    1.33
   3 -15   6   15.16    1.15
   3  15   6   13.03    1.16
  -3  15  -6   11.49    1.15
   4 -15   6   38.51    1.82
  -4  15  -6   41.32    1.93
   5 -15   6   27.04    1.54
  -5  15  -6   28.53    1.63
   6 -15   6   31.55    1.70
  -6  15  -6   33.44    1.83
   7 -15   6    2.69    0.69
  -7  15  -6    3.58    0.80
  -8  15  -6   67.75    2.84
  -9  15  -6    8.81    1.21
 -10  15  -6    6.90    1.12
 -11  15  -6   17.14    1.71
 -12  15  -6    0.02    0.53
 -13  15  -6    3.40    0.88
 -14 -15  -6    3.89    0.81
 -14  15  -6    3.74    0.98
 -15 -15  -6    7.43    1.03
 -15  15  -6    8.70    1.37
 -16 -15  -6   13.23    1.26
 -16  15  -6   17.36    1.87
 -17  15  -6    4.62    1.10
 -18  16   6    3.98    1.03
 -17  16   6    0.43    0.71
 -16  16   6    7.80    1.29
 -15  16   6   33.00    2.18
 -14  16   6    3.93    0.95
 -13  16   6    4.90    1.03
 -12 -16   6   11.53    0.82
 -12  16   6   11.73    1.44
 -11 -16   6    3.07    0.50
 -11  16   6    4.46    0.94
 -10 -16   6   48.17    1.74
 -10  16   6   49.18    2.43
  -9 -16   6   56.79    1.98
  -9  16   6   57.93    2.64
  -8 -16   6   63.52    2.16
  -8  16   6   66.26    2.76
  -7 -16   6   19.77    1.15
  -7  16   6   18.86    1.46
  -6 -16   6    5.70    0.72
  -6  16   6    7.81    1.06
  -5 -16   6    0.11    0.29
  -5  16   6    0.06    0.40
  -4 -16   6   18.95    1.15
  -4  16   6   19.05    1.35
  -3 -16   6    4.36    0.67
  -3  16   6    4.45    0.82
  -2 -16   6    1.47    0.48
  -2  16   6    1.05    0.53
  -1 -16   6   -0.24    0.26
   1  16  -6    0.20    0.31
  -1  16   6   -0.28    0.35
   0 -16   6    4.01    0.70
   0  16   6    3.59    0.71
   0  16  -6    3.95    0.67
   1 -16   6   14.30    1.13
  -1  16  -6   15.47    1.13
   1  16   6   12.86    1.19
   2 -16   6    3.26    0.67
  -2  16  -6    4.53    0.75
   2  16   6    4.23    0.73
   3 -16   6    3.48    0.69
  -3  16  -6    3.01    0.66
   4 -16   6   15.00    1.19
  -4  16  -6   13.89    1.32
   5 -16   6    2.43    0.62
  -5  16  -6    1.51    0.56
   6 -16   6    5.81    0.90
  -6  16  -6    5.29    0.90
   7 -16   6    8.63    1.11
  -7  16  -6    9.19    1.19
  -8  16  -6    1.60    0.67
  -9  16  -6    5.90    1.05
 -10  16  -6   41.01    2.30
 -11  16  -6   41.42    2.38
 -12  16  -6   18.83    1.88
 -13  16  -6   -0.07    0.60
 -14  16  -6   -0.42    0.58
 -15 -16  -6    0.01    0.48
 -15  16  -6   -0.19    0.57
 -16 -16  -6   -0.33    0.46
 -16  16  -6   -0.51    0.58
 -17  16  -6    1.96    0.87
 -18  17   6    0.45    0.74
 -17  17   6    4.35    1.06
 -16  17   6   12.76    1.61
 -15  17   6    0.78    0.71
 -14  17   6   -0.24    0.58
 -13  17   6    4.83    1.05
 -12 -17   6    0.37    0.33
 -12  17   6    1.34    0.67
 -11 -17   6   23.45    1.17
 -11  17   6   26.03    1.83
 -10 -17   6    5.64    0.70
 -10  17   6    6.62    1.11
  -9 -17   6   23.12    1.26
  -9  17   6   22.78    1.72
  -8 -17   6    1.75    0.49
  -8  17   6    0.24    0.60
  -7 -17   6   37.32    1.65
  -7  17   6   37.28    2.08
  -6 -17   6    7.48    0.86
  -6  17   6   14.39    1.43
  -5 -17   6   61.29    2.24
  -5  17   6   65.12    2.66
  -4 -17   6    1.06    0.41
  -4  17   6    2.22    0.62
  -3 -17   6    0.44    0.37
  -3  17   6    1.21    0.53
  -2 -17   6    8.85    0.99
  -2  17   6    9.28    1.09
  -1 -17   6    9.09    1.00
  -1  17   6    8.85    1.08
   0 -17   6    0.08    0.34
   0  17   6    0.49    0.40
   0  17  -6    0.01    0.32
   1 -17   6    5.19    0.80
  -1  17  -6    5.82    0.81
   1  17   6    8.37    1.02
   2 -17   6   59.20    2.37
  -2  17  -6   61.54    2.37
   2  17   6   58.13    2.35
   3 -17   6    0.32    0.42
  -3  17  -6   -0.02    0.38
   4 -17   6    7.54    0.99
  -4  17  -6    7.84    1.05
   5 -17   6    1.65    0.60
  -5  17  -6    1.25    0.55
   6 -17   6   36.61    1.94
  -6  17  -6   37.60    2.02
   7 -17   6    0.93    0.51
  -7  17  -6    0.94    0.61
  -8  17  -6    8.19    1.21
  -9  17  -6   16.95    1.68
 -10  17  -6   35.73    2.20
 -11  17  -6   53.21    2.75
 -12  17  -6   10.49    1.47
 -13  17  -6    1.10    0.75
 -14  17  -6    6.90    1.25
 -15 -17  -6    1.60    0.67
 -15  17  -6    0.57    0.75
 -16 -17  -6    0.00    0.49
 -16  17  -6    0.04    0.71
 -17  17  -6    4.73    1.22
 -17  18   6    0.80    0.73
 -16  18   6    0.10    0.68
 -15  18   6    6.08    1.22
 -14  18   6   -0.38    0.56
 -13  18   6    0.51    0.69
 -12 -18   6    0.94    0.41
 -12  18   6    0.57    0.60
 -11 -18   6    0.05    0.31
 -11  18   6   -0.20    0.49
 -10 -18   6    9.02    0.88
 -10  18   6    7.46    1.17
  -9 -18   6   -0.30    0.29
  -9  18   6   -0.19    0.52
  -8 -18   6   14.66    1.09
  -8  18   6   15.65    1.60
  -7 -18   6   26.37    1.45
  -7  18   6   29.39    1.89
  -6 -18   6    6.66    0.87
  -6  18   6    7.83    1.12
  -5 -18   6    4.99    0.76
  -5  18   6    6.42    1.02
  -4 -18   6   66.18    2.48
  -4  18   6   75.23    2.89
  -3 -18   6    3.56    0.69
  -3  18   6    4.10    0.80
  -2 -18   6   -0.23    0.37
  -2  18   6    0.57    0.46
  -1 -18   6    6.24    0.90
  -1  18   6    5.92    0.92
   0 -18   6   44.86    2.04
   0  18   6   40.46    2.02
   0  18  -6   45.14    1.95
   1 -18   6    7.34    0.99
  -1  18  -6    7.20    0.90
   1  18   6    8.47    1.04
   2 -18   6    9.45    1.10
  -2  18  -6    8.58    1.04
   3 -18   6    4.60    0.81
  -3  18  -6    2.82    0.66
   4 -18   6    6.00    0.97
  -4  18  -6    8.60    1.12
   5 -18   6    0.31    0.52
  -5  18  -6   -0.13    0.45
   6 -18   6    4.99    0.90
  -6  18  -6    7.33    1.12
   7 -18   6    0.26    0.48
  -7  18  -6    0.25    0.49
  -8  18  -6    0.90    0.59
  -9  18  -6    2.19    0.78
 -10  18  -6   52.09    2.70
 -11  18  -6   25.45    1.93
 -12  18  -6    1.18    0.76
 -13  18  -6   17.84    1.93
 -14  18  -6   -0.68    0.62
 -15 -18  -6    3.24    0.81
 -15  18  -6    3.13    1.04
 -16 -18  -6    0.87    0.55
 -16  18  -6    1.38    0.91
 -17  19   6    0.47    0.77
 -16  19   6   -0.02    0.68
 -15  19   6   -0.87    0.60
 -14  19   6    1.98    0.85
 -13 -19   6   10.43    0.85
 -13  19   6    8.29    1.33
 -12 -19   6    3.96    0.62
 -12  19   6    4.92    1.09
 -11 -19   6    0.32    0.34
 -11  19   6    0.77    0.62
 -10 -19   6   -0.04    0.31
 -10  19   6    0.61    0.58
  -9 -19   6    1.30    0.45
  -9  19   6    0.69    0.59
  -8 -19   6   19.13    1.23
  -8  19   6   18.48    1.78
  -7 -19   6    5.28    0.78
  -7  19   6    4.65    0.94
  -6 -19   6   19.70    1.32
  -6  19   6   19.72    1.59
  -5 -19   6  144.43    4.13
  -5  19   6  143.32    4.56
  -4 -19   6   33.21    1.73
  -4  19   6   30.96    1.90
  -3 -19   6    0.37    0.44
  -3  19   6    1.00    0.56
  -2 -19   6   -0.14    0.44
  -2  19   6    1.16    0.56
  -1 -19   6   47.18    2.16
  -1  19   6   50.71    2.32
   0 -19   6    1.19    0.53
   0  19   6    1.35    0.58
   1 -19   6   -0.65    0.30
   1  19   6   -0.16    0.38
  -1  19  -6   -0.25    0.38
   2 -19   6    0.68    0.49
  -2  19  -6    0.36    0.40
   3 -19   6    7.59    1.05
  -3  19  -6    8.16    1.05
   4 -19   6   -0.23    0.46
  -4  19  -6    0.77    0.54
   5 -19   6    3.11    0.82
  -5  19  -6    3.57    0.88
   6 -19   6   19.93    1.56
  -6  19  -6   17.89    1.67
   7 -19   6    0.29    0.51
  -7  19  -6    0.19    0.51
  -8  19  -6    2.02    0.72
  -9  19  -6    2.30    0.79
 -10  19  -6    3.73    0.96
 -11  19  -6   31.08    2.17
 -12  19  -6   12.92    1.68
 -13  19  -6    6.28    1.27
 -14  19  -6   13.39    1.79
 -15 -19  -6    1.57    0.62
 -15  19  -6   -0.44    0.67
 -16 -19  -6    0.58    0.55
 -16  19  -6   -0.43    0.65
 -16  20   6    1.01    0.83
 -15  20   6    0.47    0.72
 -14  20   6    2.40    0.91
 -13 -20   6   -0.20    0.37
 -13  20   6    1.17    0.78
 -12 -20   6   16.04    1.21
 -12  20   6   18.22    1.92
 -11 -20   6   12.66    1.03
 -11  20   6   14.60    1.72
 -10 -20   6    1.11    0.46
 -10  20   6    0.72    0.63
  -9 -20   6   13.80    1.08
  -9  20   6   11.74    1.48
  -8 -20   6    2.70    0.62
  -8  20   6    1.60    0.72
  -7 -20   6    7.11    0.92
  -7  20   6    5.09    1.02
  -6 -20   6    9.91    1.06
  -6  20   6   13.41    1.49
  -5 -20   6   44.27    2.05
  -5  20   6   42.21    2.32
  -4 -20   6   58.20    2.44
  -4  20   6   65.16    2.80
  -3 -20   6   12.49    1.26
  -3  20   6   14.42    1.50
  -2 -20   6    1.13    0.57
  -2  20   6    0.61    0.52
  -1 -20   6    5.75    0.92
  -1  20   6    6.87    1.04
   0 -20   6    6.97    1.00
   0  20   6    9.90    1.22
   1 -20   6    0.37    0.47
   2 -20   6    0.31    0.45
  -2  20  -6    0.05    0.46
   3 -20   6   -0.48    0.41
  -3  20  -6    0.12    0.47
   4 -20   6    2.81    0.78
  -4  20  -6    3.92    0.86
   5 -20   6   13.79    1.50
  -5  20  -6   12.98    1.44
   6 -20   6   17.87    1.69
  -6  20  -6   18.86    1.77
   7 -20   6   53.44    2.56
  -7  20  -6   52.84    2.65
  -8  20  -6    0.58    0.61
  -9  20  -6    0.58    0.59
 -10  20  -6    6.97    1.23
 -11  20  -6    2.62    0.94
 -12  20  -6    0.85    0.75
 -13  20  -6   13.89    1.84
 -14  20  -6    0.08    0.76
 -15  20  -6   -0.04    0.70
 -16 -20  -6    0.59    0.54
 -16  20  -6   -0.02    0.72
 -16  21   6   11.31    1.65
 -15  21   6   -0.64    0.64
 -14  21   6   -0.08    0.71
 -13 -21   6   14.03    1.08
 -13  21   6   15.38    1.83
 -12 -21   6   13.07    1.16
 -12  21   6   11.34    1.62
 -11 -21   6    0.93    0.47
 -11  21   6    0.80    0.76
 -10 -21   6    2.38    0.60
 -10  21   6    1.56    0.75
  -9 -21   6   -0.41    0.31
  -9  21   6   -0.47    0.52
  -8  21   6    1.91    0.81
  -7 -21   6    1.43    0.54
[truncated: 4,946,251 more chars]
